# Supplementary material for: A multi-proxy assessment of terrace formation in the lower Trinity River valley, Texas
Source: Copernicus journal article supplement (doi:10.5194/esurf-10-635-2022), 2022-06-28
Supplement: Supplementary file 1 [file esurf-10-635-2022-supplement.zip]

Archive with 11 entries (11 files):
- PaleochannelTransectsforFigure7.zip
- Terrace_5m_elevation_detrended_elevation.csv
- Paleochannel_summary.csv
- Terrace_10m_valley_plane_elevation.csv
- TrinityTerraces_characteristics.csv
- Paleochannel_bends_on_terraces.csv
- esurf-10-635-2022-supplement-title-page.pdf
- Supplementary dataset overview.pdf
- Trinity_Terraces_Plane_Fitting_Output.csv
- PaleochannelWidthsMeasurements.zip
- TerraceAndPaleochannelShapefiles.zip
