# Supplementary material for: A multi-proxy assessment of terrace formation in the lower Trinity River valley, Texas
Source: Copernicus journal article supplement (doi:10.5194/esurf-10-635-2022), 2022-06-28
Supplement: Supplementary file 1 [file esurf-10-635-2022-supplement.zip › esurf-10-635-2022-supplement-title-page.pdf]

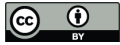

## *Supplement of*

# **A multi-proxy assessment of terrace formation in the lower Trinity River valley, Texas**

**Hima J. Hassenruck-Gudipati et al.**

*Correspondence to:* Hima J. Hassenruck-Gudipati ([himahg@utexas.edu](mailto:himahg@utexas.edu))

- [esurf-10-635-2022-supplement-title-page.pdf](#)
- [PaleochannelTransectsforFigure7.zip](#)
- [PaleochannelWidthsMeasurements.zip](#)
- [Paleochannel\\_bends\\_on\\_terraces.csv](#)
- [Paleochannel\\_summary.csv](#)
- [Supplementary dataset overview.pdf](#)
- [TerraceAndPaleochannelShapefiles.zip](#)
- [Terrace\\_10m\\_valley\\_plane\\_elevation.csv](#)
- [Terrace\\_5m\\_elevation\\_detrended\\_elevation.csv](#)
- [TrinityTerraces\\_characteristics.csv](#)
- [Trinity\\_Terraces\\_Plane\\_Fitting\\_Output.csv](#)

The copyright of individual parts of the supplement might differ from the article licence.
