# Supplementary material for: A multi-proxy assessment of terrace formation in the lower Trinity River valley, Texas
Source: Copernicus journal article supplement (doi:10.5194/esurf-10-635-2022), 2022-06-28
Supplement: Supplementary file 1 [file esurf-10-635-2022-supplement.zip › Paleochannel_bends_on_terraces.csv]

Terrace ID	Gavin classification	Sum of bends on terrace	Max number of bends from one generation of channel	Max number of bends from one channel segment
0	0	1	1	1
1	2	4	1	1
2	3	1	1	1
3	2	0	0	0
4	1	0	0	0
5	3	13	6	6
6	2	3	2	2
7	3	0	0	0
8	0	0	0	0
9	3	0	0	0
10	1	1	1	1
11	1	0	0	0
12	1	0	0	0
13	2	4	3	2
14	2	0	0	0
15	3	0	0	0
16	2	5	1	1
17	3	1	1	1
18	2	4	1	1
19	3	2	2	1
20	3	4	2	2
21	2	1	1	1
22	3	0	0	0
23	1	1	1	1
24	3	0	0	0
25	0	0	0	0
26	2	1	1	1
27	2	0	0	0
28	2	0	0	0
29	3	0	0	0
30	2	1	1	1
31	2	4	2	2
32	3	0	0	0
33	3	6	2	1
34	3	0	0	0
35	1	1	1	1
36	3	0	0	0
37	3	3	1	1
38	3	2	1	1
39	3	0	0	0
40	2	4	1	1
41	3	2	1	1
42	3	4	1	1
43	2	1	1	1
44	2	3	1	1
45	2	0	0	0
46	3	10	2	1
47	2	0	0	0
48	1	0	0	0
49	2	0	0	0
50	3	2	1	1
51	0	1	1	1
