# Supplementary material for: A multi-proxy assessment of terrace formation in the lower Trinity River valley, Texas
Source: Copernicus journal article supplement (doi:10.5194/esurf-10-635-2022), 2022-06-28
Supplement: Supplementary file 1 [file esurf-10-635-2022-supplement.zip › Paleochannel_summary.csv]

Paleochannel ID	mean width (m)	std width (m)	channel length (m)	Radius (m)	Terrace Number	Terrace level	Gavin Classification	grain size (Gavin Upper Bar High) (mm)	grain size (Gavin Upper Bar Low) (mm)	grain size(Gavin Lower Bar High) (mm)	grain size (Gavin Lower Bar Low) (mm)	number of bends	chut or neck cut off (0 = no; 1= yes)
1	349.2	19.4	6570	1921	1	MD	2	1	0.125	2	0.5	1	1
2	334.6	55.5	1990		2	HD	3	2	0.125	2	0.25	1	0
3	334.6	55.5	1990	983.4	1	MD	2	1	0.125	2	0.5	1	0
4	324.5	48.8	6420	1005	1	MD	2	1	0.125	2	0.5	1	0
5	412.3	55.1	3360		13	MD	2	1	0.125	2	0.5	1	0
6	364.3	49.1	4010	926	13	MD	2	1	0.125	2	0.5	1	1
7	325.4	63.9	8190	1105	13	MD	2	1	0.125	2	0.5	2	0
8	377.4	56.6	11950	1244	6	MD	2	1	0.125	2	0.5	2	0
9	347.4	35.5	4890	1235	6	MD	2	1	0.125	2	0.5	1	1
10	386.7	42.6	7680	1371	10	LD Veneer	1	1	0.25	4	0.25	1	1
11	310.3	46	4170	983	16	MD	2	1	0.125	2	0.5	1	0
12	531	63.8	4950	1117	16	MD	2	1	0.125	2	0.5	1	0
13	386.4	143	6910	1634	23	LD Veneer	1	1	0.25	4	0.25	1	1
14	388.8	84.6	2610	1056	18	MD	2	1	0.125	2	0.5	1	0
15	342.6	114.1	2420	727		Post-Deweyville						1	0
16	376.7	48.6	1030		18	MD	2	1	0.125	2	0.5	1	0
17	377.9	79.9	2340		18	MD	2	1	0.125	2	0.5	1	1
18	308.7	33.3	2420		26	MD	2	1	0.125	2	0.5	1	0
19	248.5	32.5	3270	1143		Post-Deweyville						1	1
20	319.6	51.3	1870	667	21	MD	2	1	0.125	2	0.5	1	1
21	252.5	32.8	3410	1443	30	MD	2	1	0.125	2	0.5	1	0
22	317.3	58	9180	1001	31	MD	2	1	0.125	2	0.5	2	1
23	392.6	69.6	9810	2000	31	MD	2	1	0.125	2	0.5	1	1
24	345.6	31	2000		31	MD	2	1	0.125	2	0.5	1	0
25	374.5	29.6	2620	1321		Post-Deweyville						1	0
26	522	41.1	2290	980		Post-Deweyville						1	0
27	215.8	28.2	4650	740	20	HD	3	2	0.125	2	0.25	2	1
28	183.1	25.4	11530	540	5	HD	3	2	0.125	2	0.25	6	0
29	211.5	23.1	2330	610	5	HD	3	2	0.125	2	0.25	1	0
30	191.9	17.1	2290	550	37	HD	3	2	0.125	2	0.25	1	0
31	202.8	23.7	2610	710	19	HD	3	2	0.125	2	0.25	1	1
32	172.8	21	2450	550	19	HD	3	2	0.125	2	0.25	1	1
33	250.3	36.8	3330	740	33	HD	3	2	0.125	2	0.25	1	1
34	132.5	14.5	1320		33	HD	3	2	0.125	2	0.25	1	0
35	155.3	18.2	4030	775	20	HD	3	2	0.125	2	0.25	1	0
36	188.4	11.9	1080		16	HD	2	1	0.125	2	0.5	1	0
37	175.6	10.8	710	480	33	HD	3	2	0.125	2	0.25	1	0
38	195.5	7	640		5	HD	3	2	0.125	2	0.25	1	0
39	163.5	24.5	3650		5	HD	3	2	0.125	2	0.25	2	0
40	217.6	25.2	1480		5	HD	3	2	0.125	2	0.25	1	0
41	200.6	57	1600		5	HD	3	2	0.125	2	0.25	1	0
42	159.6	25.3	2110		5	HD	3	2	0.125	2	0.25	1	1
43	264.4	3.9	10000		16	MD	2	1	0.125	2	0.5	1	0
44	168.8	12.3	1360		16	MD	2	1	0.125	2	0.5	1	0
45	184.2	19.1	1100		17	HD	3	2	0.125	2	0.25	1	0
46	147.6	23.7	1740		18	MD	2	1	0.125	2	0.5	1	0
47	138.2	24.3	2450		37	HD	3	2	0.125	2	0.25	1	0
48	188	11.7	1310		37	HD	3	2	0.125	2	0.25	1	0
49	82.8	18	1180		38	HD	3	2	0.125	2	0.25	1	1
50	122.8	13.5	1130		38	HD	3	2	0.125	2	0.25	1	0
51	413.1	80.3	2050		20	HD	3	2	0.125	2	0.25	1	0
52	137.6	13.4	1400		33	HD	3	2	0.125	2	0.25	1	0
53	126.8	8.9	660		33	HD	3	2	0.125	2	0.25	1	0
54	182.2	53.1	1360		33	HD	3	2	0.125	2	0.25	1	1
55	208.4	35.9	1580		40	MD	2	1	0.125	2	0.5	1	1
56	143.9	23.2	1190		40	MD	2	1	0.125	2	0.5	1	0
57	175.3	26.6	2480		40	MD	2	1	0.125	2	0.5	1	0
58	145	24.8	830		40	MD	2	1	0.125	2	0.5	1	0
59	126.1	21.4	2410		42	HD	3	2	0.125	2	0.25	1	0
60	159.5	29.4	1270		42	HD	3	2	0.125	2	0.25	1	0
61	163.6	22.7	1000		41	HD	3	2	0.125	2	0.25	1	0
62	145.2	14.1	1140		42	HD	3	2	0.125	2	0.25	1	0
63	172	6	580		43	MD	2	1	0.125	2	0.5	1	0
64	196.6	29	1650		42	HD	3	2	0.125	2	0.25	1	1
65	174.8	25.5	1280		41	HD	3	2	0.125	2	0.25	1	0
66	165.1	12.4	1000		35	LD Veneer	1	1	0.25	4	0.25	1	0
67	227.6	14.9	1580		1	MD	2	1	0.125	2	0.5	1	0
68	257.9	44.7	2460		0	LD Veneer	1	1	0.25	4	0.25	1	1
69	542.9	39.7	2090		44	MD	2	1	0.125	2	0.5	1	1
70	397.7	48.4	3700		44	MD	2	1	0.125	2	0.5	1	1
71	245.7	21.6	1730		44	MD	2	1	0.125	2	0.5	1	0
72	158.2	12.1	640		46	HD	3	2	0.125	2	0.25	1	1
73	191.6	15	1020		46	HD	3	2	0.125	2	0.25	1	0
74	177.7	10.1	1000		46	HD	3	2	0.125	2	0.25	1	0
75	182	16.6	500		46	HD	3	2	0.125	2	0.25	1	0
76	238.6	21.9	1050		46	HD	3	2	0.125	2	0.25	1	0
77	236.2	34	1930		46	HD	3	2	0.125	2	0.25	1	0
78	305.6	60.6	2050		46	HD	3	2	0.125	2	0.25	1	1
79	206.8	19.9	1340		46	HD	3	2	0.125	2	0.25	1	0
80	201.4	17.8	960		46	HD	3	2	0.125	2	0.25	1	0
81	191.7	20.3	3250		50	HD	3	2	0.125	2	0.25	1	1
82	193.6	16.1	1990		50	HD	3	2	0.125	2	0.25	1	0
83	215.3	35.5	940		46	HD	3	2	0.125	2	0.25	1	0
84	208.5	27.5	2000		51	Post-Deweyville						1	0
