# Supplementary material for: A multi-proxy assessment of terrace formation in the lower Trinity River valley, Texas
Source: Copernicus journal article supplement (doi:10.5194/esurf-10-635-2022), 2022-06-28
Supplement: Supplementary file 1 [file esurf-10-635-2022-supplement.zip › Supplementary dataset overview.pdf]

## Supplementary dataset overview

This datasets contains analysis outputs used to plot the figures in the manuscript.

**S1: TrinityTerraces\_characteristics.csv** include all terrace specific data including terrace id, classification, median and interquartile range of UTM northing, easting, elevation, and detrended elevation as well as terrace ids of adjacent lower and higher terraces. The minimum bounding box width and length are also included.

**S2: Terrace\_5m\_elevation\_detrended\_elevation.csv** includes all elevation and detrended elevations at the 5m DEM resolution and including their coordinates, corresponding terrace and terrace classification.

**S3: Terrace\_10m\_valley\_plane\_elevation.csv** includes the corresponding elevations on terraces from the best-fit plane to the modern valley data.

**S4: Trinity\_Terraces\_Plane\_Fitting\_output.csv** includes the RMSE of a best-fit plane fitted to the high, intermediate and low Deweyville terraces as well as the RMSE of randomly classified terrace sets.

**S5: Paleochannel\_summary.csv** includes all paleochannel specific data including paleochannel id, mean and standard deviation of width, length of paleochannel, corresponding terrace id and terrace classification, assigned representative grain size, number of channel bends preserved, and channel bend appear to preserve bend cut-off.

**S6: Paleochannel\_bends\_on\_terraces.csv** includes a closer look at the paleochannel bends preserved on each terrace and aggregates the total number of bends on each terraces, the maximum number of bends related to on generation of channel, and the maximum number of bends for one continuous channel segment.

**S7: PaleochannelWidthsMeasurements.zip** includes text files for width measurements for each paleo-channel. These were used to find the mean and standard deviation of width as well as the length of the paleo-channel in S5. Paleo-channel widths were found using the River Planform Statistics Toolbox, a part of the National Center for Earth Surface Dynamics stream reservation toolbox (Lauer, 2006). Each text file has: 1) the distance along the channel, m (m), 2) the paleo-channel width, width (m), 3) channel center angle to previous channel center, theta (-), 4) theta to previous transect theta dtheta (-), 5) curvature of channel, r\_curve (°), 6) the UTM x coordinate of the channel center, cl\_x (m), 7) the UTM y coordinate of the channel center, cl\_y (m), 8) the UTM x coordinate of left bank, left\_x (m), 9) the UTM y coordinate of left bank, left\_y (m), 10) the UTM x coordinate of the right bank, right\_x (m), 11) the UTM y coordinate of the right bank, right\_y (m).

**S8: PaleochannelTransectsForFigure7.zip** includes text files for paleo-channel transects plotted in Figures 7. Each text file has an x (m) variable, which denotes the distance along the transect, and an elevation (m) variable.

**S9: TerraceAndPaleochannelShapefiles.zip** includes .shp files for terrace outlines and paleo-channel banks. Each paleochannel bank is a separate polyline and left (L) and right (R) paleo-channel banks are denoted with their ID.
