# Supplementary material for: A multi-proxy assessment of terrace formation in the lower Trinity River valley, Texas
Source: Copernicus journal article supplement (doi:10.5194/esurf-10-635-2022), 2022-06-28
Supplement: Supplementary file 1 [file esurf-10-635-2022-supplement.zip › Terrace_5m_elevation_detrended_elevation.csv]

FID	Elevation_m	Terrace_ID	GarMS_Clas	pointid	detrendedelev_m	POINT_X	POINT_Y
0	30.78249931	50	3	1	5.8837299	308707.1192	3389700.619
1	29.88999939	50	3	2	5.2589598	308757.1193	3389700.619
2	30.76000023	50	3	3	6.1817598	308807.1194	3389700.619
3	30.44249916	50	3	4	5.0707402	308857.1195	3389700.619
4	30.77666664	50	3	5	5.55757	308907.1196	3389700.619
5	31.47714233	50	3	6	6.52913	308957.1197	3389700.619
6	31.31222153	50	3	7	6.3597598	309007.1199	3389700.619
7	31.39249992	50	3	8	6.39891	309057.12	3389700.619
8	32.20999908	50	3	9	7.1083899	309107.1201	3389700.619
9	32.20999908	50	3	10	6.9786401	309157.1202	3389700.619
10	31.85499954	50	3	11	6.7497101	309207.1203	3389700.619
11	31.87400055	50	3	12	6.8699498	309257.1205	3389700.619
12	31.56749916	50	3	13	6.55653	309307.1206	3389700.619
13	31.29599953	50	3	14	6.4847102	309357.1207	3389700.619
14	30.80200005	50	3	15	6.21525	309407.1208	3389700.619
15	30.55249977	50	3	16	5.4678001	309457.1209	3389700.619
16	30.13249969	50	3	17	5.14644	309507.1211	3389700.619
17	29.78666687	50	3	18	4.8638802	309557.1212	3389700.619
18	28.73200035	50	3	19	3.8632901	309607.1213	3389700.619
19	29.01600075	50	3	20	3.9654	309657.1214	3389700.619
20	29.64999962	50	3	21	4.4974198	309707.1215	3389700.619
21	30.33749962	50	3	22	5.2933698	308707.1192	3389650.631
22	30.11499977	50	3	23	5.17168	308757.1193	3389650.631
23	30.19499969	50	3	24	5.3246999	308807.1194	3389650.631
24	30.44249916	50	3	25	5.31668	308857.1195	3389650.631
25	31.40600014	50	3	26	6.01335	308907.1196	3389650.631
26	31.14599991	50	3	27	6.3625202	308957.1197	3389650.631
27	31.32999992	50	3	28	6.3125701	309007.1199	3389650.631
28	31.48500061	50	3	29	6.5078802	309057.12	3389650.631
29	32.21285629	50	3	30	7.1865902	309107.1201	3389650.631
30	32.03499985	50	3	31	7.06813	309157.1202	3389650.631
31	31.69249916	50	3	32	6.6756802	309207.1203	3389650.631
32	31.90200043	50	3	33	6.8432298	309257.1205	3389650.631
33	31.54166603	50	3	34	6.5099401	309307.1206	3389650.631
34	31.40200043	50	3	35	6.2678099	309357.1207	3389650.631
35	30.88199997	50	3	36	5.9516501	309407.1208	3389650.631
36	30.13599968	50	3	37	5.5058699	309457.1209	3389650.631
37	29.86499977	50	3	38	4.95297	309507.1211	3389650.631
38	29.46666718	50	3	39	4.7920799	309557.1212	3389650.631
39	28.85000038	50	3	40	3.85572	309607.1213	3389650.631
40	29.0739994	50	3	41	4.0405698	309657.1214	3389650.631
41	29.91799927	50	3	42	4.7615099	309707.1215	3389650.631
42	28.56749916	50	3	43	4.6097002	308707.1192	3389600.644
43	30.90600014	50	3	44	4.9869499	308757.1193	3389600.644
44	30.06999969	50	3	45	5.2556901	308807.1194	3389600.644
45	30.13249969	50	3	46	5.1774998	308857.1195	3389600.644
46	31.41500092	50	3	47	6.3225799	308907.1196	3389600.644
47	31.14800072	50	3	48	6.1968598	308957.1197	3389600.644
48	31.03666687	50	3	49	6.2397299	309007.1199	3389600.644
49	31.59749985	50	3	50	6.4470501	309057.12	3389600.644
50	31.98999977	50	3	51	7.1354899	309107.1201	3389600.644
51	31.68600082	50	3	52	7.0500998	309157.1202	3389600.644
52	31.78750038	50	3	53	6.6146402	309207.1203	3389600.644
53	31.67000008	50	3	54	6.81812	309257.1205	3389600.644
54	31.33200073	50	3	55	6.3456302	309307.1206	3389600.644
55	31.49600029	50	3	56	6.57618	309357.1207	3389600.644
56	30.50799942	50	3	57	6.0289202	309407.1208	3389600.644
57	30.13249969	50	3	58	5.6020002	309457.1209	3389600.644
58	29.82166672	50	3	59	5.0616999	309507.1211	3389600.644
59	29.81333351	50	3	60	4.6511798	309557.1212	3389600.644
60	30.26799965	50	3	61	3.9369299	309607.1213	3389600.644
61	30.55249977	50	3	62	4.3980098	308707.1192	3389550.656
62	30.79750061	50	3	63	5.83215	308757.1193	3389550.656
63	30.08333397	50	3	64	5.15169	308807.1194	3389550.656
64	30.8516674	50	3	65	5.5511999	308857.1195	3389550.656
65	31.07500076	50	3	66	6.2209802	308907.1196	3389550.656
66	30.99600029	50	3	67	6.1666899	308957.1197	3389550.656
67	31.05999947	50	3	68	6.1265998	309007.1199	3389550.656
68	31.88800049	50	3	69	6.8512502	309057.12	3389550.656
69	32.10599899	50	3	70	7.0426302	309107.1201	3389550.656
70	31.44249916	50	3	71	6.7716398	309157.1202	3389550.656
71	32.34999847	50	3	72	6.9911098	309207.1203	3389550.656
72	31.41600037	50	3	73	6.6012902	309257.1205	3389550.656
73	31.75799942	50	3	74	6.4647999	309307.1206	3389550.656
74	31.40999985	50	3	75	6.7342401	309357.1207	3389550.656
75	31.04166603	50	3	76	6.0465899	309407.1208	3389550.656
76	30.48500061	50	3	77	5.40523	309457.1209	3389550.656
77	29.42749977	50	3	78	4.7242398	309507.1211	3389550.656
78	28.70999908	50	3	79	4.1133199	309557.1212	3389550.656
79	28.9640007	50	3	80	4.2167001	309607.1213	3389550.656
80	30.37666702	50	3	81	5.01297	308707.1192	3389500.668
81	30.1760006	50	3	82	5.70438	308757.1193	3389500.668
82	30.38500023	50	3	83	5.1108298	308807.1194	3389500.668
83	30.82999992	50	3	84	5.9665399	308857.1195	3389500.668
84	30.85750008	50	3	85	6.1107502	308907.1196	3389500.668
85	30.91500092	50	3	86	6.0191302	308957.1197	3389500.668
86	31.58833313	50	3	87	6.3047299	309007.1199	3389500.668
87	31.72714233	50	3	88	6.80268	309057.12	3389500.668
88	31.86000061	50	3	89	7.09199	309107.1201	3389500.668
89	31.52000046	50	3	90	6.6354299	309157.1202	3389500.668
90	32.22200012	50	3	91	7.2683101	309207.1203	3389500.668
91	31.10250092	50	3	92	6.3680902	309257.1205	3389500.668
92	31.80599976	50	3	93	6.8756299	309307.1206	3389500.668
93	31.27000046	50	3	94	6.4618101	309357.1207	3389500.668
94	31.19000053	50	3	95	6.0932498	309407.1208	3389500.668
95	30.14599991	50	3	96	5.4374599	309457.1209	3389500.668
96	29.34000015	50	3	97	4.4533401	309507.1211	3389500.668
97	28.54800034	50	3	98	3.70382	309557.1212	3389500.668
98	28.99833298	50	3	99	3.9895999	309607.1213	3389500.668
99	30.78199959	50	3	100	5.52001	308707.1192	3389450.68
100	30.09000015	50	3	101	5.19168	308757.1193	3389450.68
101	30.73800087	50	3	102	5.4661899	308807.1194	3389450.68
102	31.14249992	50	3	103	5.99791	308857.1195	3389450.68
103	30.83250046	50	3	104	5.88802	308907.1196	3389450.68
104	31.19400024	50	3	105	6.0623999	308957.1197	3389450.68
105	31.2183342	50	3	106	6.48348	309007.1199	3389450.68
106	31.86000061	50	3	107	6.8554201	309057.12	3389450.68
107	31.30750084	50	3	108	6.6329899	309107.1201	3389450.68
108	32.13199997	50	3	109	6.8069701	309157.1202	3389450.68
109	31.94199944	50	3	110	7.08781	309207.1203	3389450.68
110	31.1420002	50	3	111	6.2858901	309257.1205	3389450.68
111	31.8220005	50	3	112	6.8751001	309307.1206	3389450.68
112	31.55999947	50	3	113	6.5387402	309357.1207	3389450.68
113	31.0739994	50	3	114	6.08459	309407.1208	3389450.68
114	30.25799942	50	3	115	5.2716599	309457.1209	3389450.68
115	28.70800018	50	3	116	4.3991399	309507.1211	3389450.68
116	28.45000076	50	3	117	3.57885	309557.1212	3389450.68
117	29.21750069	50	3	118	4.1961999	309607.1213	3389450.68
118	30.27799988	50	3	119	5.48704	308707.1192	3389400.693
119	30.37199974	50	3	120	5.2697802	308757.1193	3389400.693
120	30.61750031	50	3	121	5.87713	308807.1194	3389400.693
121	30.94400024	50	3	122	6.0457702	308857.1195	3389400.693
122	31.17250061	50	3	123	6.0713501	308907.1196	3389400.693
123	30.94199944	50	3	124	6.3059602	308957.1197	3389400.693
124	31.72166634	50	3	125	6.4052701	309007.1199	3389400.693
125	31.38249969	50	3	126	6.73561	309057.12	3389400.693
126	31.29000092	50	3	127	6.38519	309107.1201	3389400.693
127	32.22800064	50	3	128	7.12359	309157.1202	3389400.693
128	31.07799911	50	3	129	6.7059102	309207.1203	3389400.693
129	31.78000069	50	3	130	6.5486202	309257.1205	3389400.693
130	31.34499931	50	3	131	6.7520399	309307.1206	3389400.693
131	31.50749969	50	3	132	6.6842399	309357.1207	3389400.693
132	30.54999924	50	3	133	6.0014901	309407.1208	3389400.693
133	29.61000061	50	3	134	5.0004301	309457.1209	3389400.693
134	28.09749985	50	3	135	3.48931	309507.1211	3389400.693
135	28.48500061	50	3	136	3.5824499	309557.1212	3389400.693
136	29.39999962	50	3	137	4.2933302	309607.1213	3389400.693
137	30.48999977	50	3	138	5.3105402	308707.1192	3389350.705
138	30.43000031	50	3	139	5.60361	308757.1193	3389350.705
139	30.62333298	50	3	140	5.91113	308807.1194	3389350.705
140	30.70499992	50	3	141	5.8505001	308857.1195	3389350.705
141	30.86000061	50	3	142	6.03265	308907.1196	3389350.705
142	31.60250092	50	3	143	6.1978898	308957.1197	3389350.705
143	31.47400093	50	3	144	6.69244	309007.1199	3389350.705
144	31.32500076	50	3	145	6.3864498	309057.12	3389350.705
145	31.59250069	50	3	146	6.58776	309107.1201	3389350.705
146	31.18571472	50	3	147	6.8358402	309157.1202	3389350.705
147	31.43000031	50	3	148	6.3734102	309207.1203	3389350.705
148	31.78874969	50	3	149	6.9027901	309257.1205	3389350.705
149	31.6420002	50	3	150	6.5193701	309307.1206	3389350.705
150	31.47777748	50	3	151	6.69555	309357.1207	3389350.705
151	30.31428528	50	3	152	5.7246499	309407.1208	3389350.705
152	28.68666649	50	3	153	4.3618302	309457.1209	3389350.705
153	28.24250031	50	3	154	3.38377	309507.1211	3389350.705
154	28.36833382	50	3	155	3.49418	309557.1212	3389350.705
155	29.07999992	50	3	156	4.3069301	309607.1213	3389350.705
156	29.15500069	50	3	157	3.48733	308657.119	3389300.717
157	30.40500069	50	3	158	5.6661401	308707.1192	3389300.717
158	30.13777733	50	3	159	5.5938501	308757.1193	3389300.717
159	30.38444519	50	3	160	5.5608602	308807.1194	3389300.717
160	31.14374924	50	3	161	5.76123	308857.1195	3389300.717
161	31.33699989	50	3	162	6.44416	308907.1196	3389300.717
162	31.47777748	50	3	163	6.6423302	308957.1197	3389300.717
163	31.50428581	50	3	164	6.5237298	309007.1199	3389300.717
164	31.05285645	50	3	165	6.4250998	309057.12	3389300.717
165	30.86499977	50	3	166	6.3048201	309107.1201	3389300.717
166	31.37249947	50	3	167	6.3214598	309157.1202	3389300.717
167	31.87142944	50	3	168	6.7431002	309207.1203	3389300.717
168	31.33749962	50	3	169	6.7000699	309257.1205	3389300.717
169	31.77000046	50	3	170	6.80685	309307.1206	3389300.717
170	30.82500076	50	3	171	6.4053102	309357.1207	3389300.717
171	29.81857109	50	3	172	5.3761501	309407.1208	3389300.717
172	27.19166756	50	3	173	3.4261999	309457.1209	3389300.717
173	28.10499954	50	3	174	3.24985	309507.1211	3389300.717
174	28.25499916	50	3	175	3.358	309557.1212	3389300.717
175	29.05374908	50	3	176	4.0527601	309607.1213	3389300.717
176	30.06857109	50	3	177	4.7174101	308657.119	3389250.73
177	30.52874947	50	3	178	5.6373801	308707.1192	3389250.73
178	29.84799957	50	3	179	4.99582	308757.1193	3389250.73
179	30.56624985	50	3	180	5.6047301	308807.1194	3389250.73
180	30.99777794	50	3	181	6.3264699	308857.1195	3389250.73
181	31.37874985	50	3	182	6.4393501	308907.1196	3389250.73
182	31.36000061	50	3	183	6.6170702	308957.1197	3389250.73
183	30.62999916	50	3	184	6.3277402	309007.1199	3389250.73
184	30.75	50	3	185	5.8692098	309057.12	3389250.73
185	31.36857224	50	3	186	6.2473898	309107.1201	3389250.73
186	31.75111198	50	3	187	6.5518899	309157.1202	3389250.73
187	31.70065689	50	3	188	6.8519802	309207.1203	3389250.73
188	31.69625092	50	3	189	6.6721501	309257.1205	3389250.73
189	31.48999977	50	3	190	6.7322102	309307.1206	3389250.73
190	30.64500046	50	3	191	5.8775301	309357.1207	3389250.73
191	28.68666649	50	3	192	4.6554899	309407.1208	3389250.73
192	27.91428566	50	3	193	3.17659	309457.1209	3389250.73
193	27.98125076	50	3	194	3.1572101	309507.1211	3389250.73
194	28.44000053	50	3	195	3.4254701	309557.1212	3389250.73
195	29.30714226	50	3	196	4.2199001	309607.1213	3389250.73
196	30.86285782	50	3	197	5.92941	309657.1214	3389250.73
197	30.48428535	50	3	198	5.5900602	308657.119	3389200.742
198	30.01857185	50	3	199	5.4945898	308707.1192	3389200.742
199	30.20666695	50	3	200	5.0132298	308757.1193	3389200.742
200	30.36777687	50	3	201	5.7088799	308807.1194	3389200.742
201	30.64999962	50	3	202	6.0608802	308857.1195	3389200.742
202	30.68000031	50	3	203	6.47401	308907.1196	3389200.742
203	30.30428505	50	3	204	5.9850602	308957.1197	3389200.742
204	30.98888969	50	3	205	5.7680898	309007.1199	3389200.742
205	31.22555542	50	3	206	6.3049002	309057.12	3389200.742
206	31.69333267	50	3	207	6.46316	309107.1201	3389200.742
207	31.57888794	50	3	208	6.7312698	309157.1202	3389200.742
208	31.57777786	50	3	209	6.78725	309207.1203	3389200.742
209	31.10124969	50	3	210	6.84516	309257.1205	3389200.742
210	31.09428596	50	3	211	6.5939102	309307.1206	3389200.742
211	29.76000023	50	3	212	5.4865098	309357.1207	3389200.742
212	27.84111023	50	3	213	3.49702	309407.1208	3389200.742
213	27.80374908	50	3	214	3.0454299	309457.1209	3389200.742
214	27.97857094	50	3	215	3.04444	309507.1211	3389200.742
215	28.32999992	50	3	216	3.5384099	309557.1212	3389200.742
216	29.43833351	50	3	217	4.4122	309607.1213	3389200.742
217	30.78000069	50	3	218	5.86903	309657.1214	3389200.742
218	29.38599968	50	3	219	3.99299	308607.1189	3389150.754
219	30.40800095	50	3	220	5.5201602	308657.119	3389150.754
220	30.41600037	50	3	221	5.3919201	308707.1192	3389150.754
221	30.61750031	50	3	222	5.5378399	308757.1193	3389150.754
222	30.98399925	50	3	223	5.5711799	308807.1194	3389150.754
223	30.54750061	50	3	224	5.6774602	308857.1195	3389150.754
224	30.61333275	50	3	225	5.7202101	308907.1196	3389150.754
225	31.25399971	50	3	226	5.9967899	308957.1197	3389150.754
226	31.01600075	50	3	227	6.31777	309007.1199	3389150.754
227	31.73285675	50	3	228	6.4215698	309057.12	3389150.754
228	31.38999939	50	3	229	6.7697902	309107.1201	3389150.754
229	31.51250076	50	3	230	6.7266998	309157.1202	3389150.754
230	31.79750061	50	3	231	6.8954802	309207.1203	3389150.754
231	31.55111122	50	3	232	6.6838398	309257.1205	3389150.754
232	29.9279995	50	3	233	5.9619999	309307.1206	3389150.754
233	28.6779995	50	3	234	4.3210702	309357.1207	3389150.754
234	27.64249992	50	3	235	2.9167399	309407.1208	3389150.754
235	27.64249992	50	3	236	2.8864999	309457.1209	3389150.754
236	27.77499962	50	3	237	3.0078001	309507.1211	3389150.754
237	28.32333374	50	3	238	3.3248301	309557.1212	3389150.754
238	30.08499908	50	3	239	4.7533598	309607.1213	3389150.754
239	31.39999962	50	3	240	6.1692901	309657.1214	3389150.754
240	30.26000023	50	3	241	5.0643201	308607.1189	3389100.766
241	30.44499969	50	3	242	5.5836301	308657.119	3389100.766
242	30.48500061	50	3	243	5.6901398	308707.1192	3389100.766
243	30.95599937	50	3	244	5.9804902	308757.1193	3389100.766
244	30.36000061	50	3	245	5.9783902	308807.1194	3389100.766
245	30.68600082	50	3	246	5.6733699	308857.1195	3389100.766
246	31.125	50	3	247	6.1294799	308907.1196	3389100.766
247	31.02000046	50	3	248	6.20892	308957.1197	3389100.766
248	31.60499954	50	3	249	6.5482402	309007.1199	3389100.766
249	31.23250008	50	3	250	6.65488	309057.12	3389100.766
250	31.74200058	50	3	251	6.7635002	309107.1201	3389100.766
251	31.88599968	50	3	252	7.0075002	309157.1202	3389100.766
252	31.38400078	50	3	253	6.8249402	309207.1203	3389100.766
253	30.79999924	50	3	254	6.3378601	309257.1205	3389100.766
254	29.16250038	50	3	255	5.3990402	309307.1206	3389100.766
255	27.37000084	50	3	256	3.0829401	309357.1207	3389100.766
256	27.41399956	50	3	257	2.69435	309407.1208	3389100.766
257	27.42499924	50	3	258	2.7937	309457.1209	3389100.766
258	27.65500069	50	3	259	2.89821	309507.1211	3389100.766
259	29.21249962	50	3	260	3.77702	309557.1212	3389100.766
260	31.25250053	50	3	261	5.8105302	309607.1213	3389100.766
261	31.79500008	50	3	262	6.8425999	309657.1214	3389100.766
262	32.16999817	50	3	263	7.3758502	309707.1215	3389100.766
263	32.49833298	50	3	264	7.9278798	309757.1216	3389100.766
264	33.10333252	50	3	265	8.7089996	309807.1218	3389100.766
265	33.52199936	50	3	266	9.3458204	309857.1219	3389100.766
266	34.09624863	50	3	267	9.71667	309907.122	3389100.766
267	34.5233345	50	3	268	9.9345903	309957.1221	3389100.766
268	33.94124985	50	3	269	9.7922001	310007.1222	3389100.766
269	33.66333389	50	3	270	9.43081	310057.1224	3389100.766
270	33.61199951	50	3	271	9.2185802	310107.1225	3389100.766
271	33.49000168	50	3	272	9.1147804	310157.1226	3389100.766
272	33.60666656	50	3	273	9.2063904	310207.1227	3389100.766
273	33.89199829	50	3	274	9.4610004	310257.1228	3389100.766
274	33.875	50	3	275	9.4105101	310307.123	3389100.766
275	33.95333481	50	3	276	9.4549198	310357.1231	3389100.766
276	34.17499924	50	3	277	9.5647297	310407.1232	3389100.766
277	34.06000137	50	3	278	9.5741396	310457.1233	3389100.766
278	33.875	50	3	279	9.4863195	310507.1234	3389100.766
279	33.59999847	50	3	280	9.1682596	310557.1235	3389100.766
280	33.67333221	50	3	281	9.0646896	310607.1237	3389100.766
281	33.58750153	50	3	282	8.9883499	310657.1238	3389100.766
282	33.22000122	50	3	283	8.8281603	310707.1239	3389100.766
283	33.20249939	50	3	284	8.6845303	310757.124	3389100.766
284	33.49000168	50	3	285	8.8306103	310807.1241	3389100.766
285	33.37400055	50	3	286	8.7320995	310857.1243	3389100.766
286	33.33428574	50	3	287	8.8009396	310907.1244	3389100.766
287	33.52999878	50	3	288	9.2086296	310957.1245	3389100.766
288	30.17399979	50	3	289	5.7774801	308607.1189	3389050.779
289	30.40749931	50	3	290	5.7279601	308657.119	3389050.779
290	30.46750069	50	3	291	5.7670698	308707.1192	3389050.779
291	30.72200012	50	3	292	5.8606601	308757.1193	3389050.779
292	30.97200012	50	3	293	5.89609	308807.1194	3389050.779
293	31.12999916	50	3	294	6.1536398	308857.1195	3389050.779
294	31.33799934	50	3	295	6.27351	308907.1196	3389050.779
295	31.19499969	50	3	296	6.4826498	308957.1197	3389050.779
296	31.17499924	50	3	297	6.2476702	309007.1199	3389050.779
297	31.50749969	50	3	298	6.6565499	309057.12	3389050.779
298	31.98600006	50	3	299	7.01443	309107.1201	3389050.779
299	31.20999908	50	3	300	7.05194	309157.1202	3389050.779
300	30.74166679	50	3	301	6.50735	309207.1203	3389050.779
301	29.79199982	50	3	302	5.7360902	309257.1205	3389050.779
302	27.79599953	50	3	303	3.6041999	309307.1206	3389050.779
303	27.17499924	50	3	304	2.5160401	309357.1207	3389050.779
304	27.27857208	50	3	305	2.6107199	309407.1208	3389050.779
305	27.45000076	50	3	306	2.6521599	309457.1209	3389050.779
306	28.07600021	50	3	307	3.0085101	309507.1211	3389050.779
307	30.59799957	50	3	308	4.99018	309557.1212	3389050.779
308	31.83749962	50	3	309	6.7117901	309607.1213	3389050.779
309	32.02750015	50	3	310	7.1869402	309657.1214	3389050.779
310	31.96750069	50	3	311	7.26862	309707.1215	3389050.779
311	32.14500046	50	3	312	7.4485602	309757.1216	3389050.779
312	32.45000076	50	3	313	7.8095698	309807.1218	3389050.779
313	32.69499969	50	3	314	8.1696501	309857.1219	3389050.779
314	33.0359993	50	3	315	8.5899296	309907.122	3389050.779
315	33.27600098	50	3	316	8.9699097	309957.1221	3389050.779
316	33.36750031	50	3	317	8.8218403	310007.1222	3389050.779
317	32.95000076	50	3	318	8.4738503	310057.1224	3389050.779
318	33.01499939	50	3	319	8.4267998	310107.1225	3389050.779
319	33.15000153	50	3	320	8.3256798	310157.1226	3389050.779
320	32.81666565	50	3	321	8.3817501	310207.1227	3389050.779
321	33.27999878	50	3	322	8.5845003	310257.1228	3389050.779
322	33.34999847	50	3	323	8.7996101	310307.123	3389050.779
323	33.31833267	50	3	324	8.8441401	310357.1231	3389050.779
324	33.47249985	50	3	325	8.8908596	310407.1232	3389050.779
325	33.4679985	50	3	326	8.8965101	310457.1233	3389050.779
326	33.43500137	50	3	327	8.8112202	310507.1234	3389050.779
327	33.4366684	50	3	328	8.7008305	310557.1235	3389050.779
328	33.45999908	50	3	329	8.6982698	310607.1237	3389050.779
329	33.43399811	50	3	330	8.7084904	310657.1238	3389050.779
330	33.13999939	50	3	331	8.4470596	310707.1239	3389050.779
331	33.1780014	50	3	332	8.3795004	310757.124	3389050.779
332	33.36999893	50	3	333	8.3970499	310807.1241	3389050.779
333	33.14799881	50	3	334	8.3811598	310857.1243	3389050.779
334	33.20000076	50	3	335	8.3875303	310907.1244	3389050.779
335	33.28666687	50	3	336	8.4903803	310957.1245	3389050.779
336	33.38199997	50	3	337	8.7289801	311007.1246	3389050.779
337	33.64666748	50	3	338	9.0362701	311057.1247	3389050.779
338	33.27399826	50	3	339	8.4968204	311107.1249	3389050.779
339	32.99333191	50	3	340	8.5471601	311157.125	3389050.779
340	30.19333267	50	3	341	4.5001101	308557.1188	3389000.791
341	30.78800011	50	3	342	5.1626101	308607.1189	3389000.791
342	30.84600067	50	3	343	5.552	308657.119	3389000.791
343	30.52199936	50	3	344	5.93648	308707.1192	3389000.791
344	30.61000061	50	3	345	6.2448502	308757.1193	3389000.791
345	30.83833313	50	3	346	6.0665998	308807.1194	3389000.791
346	31.3239994	50	3	347	6.2390699	308857.1195	3389000.791
347	30.56399918	50	3	348	6.4246802	308907.1196	3389000.791
348	31.21500015	50	3	349	6.2692499	308957.1197	3389000.791
349	31.58250046	50	3	350	6.67031	309007.1199	3389000.791
350	31.76833344	50	3	351	6.87608	309057.12	3389000.791
351	31.15800095	50	3	352	7.0268602	309107.1201	3389000.791
352	30.75200081	50	3	353	6.3670001	309157.1202	3389000.791
353	29.93400002	50	3	354	5.7621498	309207.1203	3389000.791
354	28.03000069	50	3	355	4.12012	309257.1205	3389000.791
355	25.40600014	50	3	356	2.6678901	309307.1206	3389000.791
356	27.15833282	50	3	357	2.32284	309357.1207	3389000.791
357	27.33799934	50	3	358	2.5176899	309407.1208	3389000.791
358	27.94400024	50	3	359	2.6772299	309457.1209	3389000.791
359	29.48399925	50	3	360	3.86481	309507.1211	3389000.791
360	30.98999977	50	3	361	5.79005	309557.1212	3389000.791
361	31.55500031	50	3	362	7.2027898	309607.1213	3389000.791
362	31.87249947	50	3	363	7.1844702	309657.1214	3389000.791
363	31.88599968	50	3	364	7.1824899	309707.1215	3389000.791
364	31.84000015	50	3	365	7.1791601	309757.1216	3389000.791
365	31.94400024	50	3	366	7.3519001	309807.1218	3389000.791
366	32.09400177	50	3	367	7.56709	309857.1219	3389000.791
367	32.27399826	50	3	368	7.79986	309907.122	3389000.791
368	32.52166748	50	3	369	8.0259399	309957.1221	3389000.791
369	32.58599854	50	3	370	8.1435499	310007.1222	3389000.791
370	32.68249893	50	3	371	8.0314198	310057.1224	3389000.791
371	32.75799942	50	3	372	8.0446596	310107.1225	3389000.791
372	32.82249832	50	3	373	8.2204399	310157.1226	3389000.791
373	32.9375	50	3	374	8.1474504	310207.1227	3389000.791
374	33.01200104	50	3	375	8.2591496	310257.1228	3389000.791
375	33.09999847	50	3	376	8.3667097	310307.123	3389000.791
376	33.19400024	50	3	377	8.4821196	310357.1231	3389000.791
377	33.12749863	50	3	378	8.52526	310407.1232	3389000.791
378	33.22193527	50	3	379	8.5274096	310457.1233	3389000.791
379	33.23400116	50	3	380	8.63025	310507.1234	3389000.791
380	33.17200089	50	3	381	8.5880604	310557.1235	3389000.791
381	33.1875	50	3	382	8.6125498	310607.1237	3389000.791
382	33.52399826	50	3	383	8.5652905	310657.1238	3389000.791
383	33.22333145	50	3	384	8.3670301	310707.1239	3389000.791
384	32.98400116	50	3	385	8.3364	310757.124	3389000.791
385	33.26599884	50	3	386	8.4848804	310807.1241	3389000.791
386	33.13000107	50	3	387	8.3323603	310857.1243	3389000.791
387	33.11666489	50	3	388	8.3517704	310907.1244	3389000.791
388	33.12666702	50	3	389	8.3616104	310957.1245	3389000.791
389	33.11249924	50	3	390	8.44349	311007.1246	3389000.791
390	33.25500107	50	3	391	8.6064301	311057.1247	3389000.791
391	32.99000168	50	3	392	8.3572798	311107.1249	3389000.791
392	34.4640007	50	3	393	8.5135202	311157.125	3389000.791
393	33.09000015	50	3	394	8.4900599	311207.1251	3389000.791
394	30.375	50	3	395	4.3536	308507.1187	3388950.803
395	30.69400024	50	3	396	5.5359802	308557.1188	3388950.803
396	30.55142784	50	3	397	5.60462	308607.1189	3388950.803
397	30.72166634	50	3	398	5.5799999	308657.119	3388950.803
398	30.75	50	3	399	5.5715799	308707.1192	3388950.803
399	30.94249916	50	3	400	5.88028	308757.1193	3388950.803
400	30.76399994	50	3	401	6.1426301	308807.1194	3388950.803
401	30.82999992	50	3	402	6.1293402	308857.1195	3388950.803
402	31.39500046	50	3	403	6.0706201	308907.1196	3388950.803
403	31.65749931	50	3	404	6.60746	308957.1197	3388950.803
404	31.51250076	50	3	405	6.8545799	309007.1199	3388950.803
405	31.46999931	50	3	406	6.8839798	309057.12	3388950.803
406	30.37199974	50	3	407	6.3601198	309107.1201	3388950.803
407	30.27499962	50	3	408	5.6403999	309157.1202	3388950.803
408	28.08166695	50	3	409	4.4495201	309207.1203	3388950.803
409	26.53000069	50	3	410	2.75316	309257.1205	3388950.803
410	26.95666695	50	3	411	2.1443701	309307.1206	3388950.803
411	27.1566658	50	3	412	2.3891799	309357.1207	3388950.803
412	27.44499969	50	3	413	2.5438199	309407.1208	3388950.803
413	29.3125	50	3	414	3.5913301	309457.1209	3388950.803
414	30.66250038	50	3	415	5.19484	309507.1211	3388950.803
415	31.05400085	50	3	416	6.1038899	309557.1212	3388950.803
416	31.44249916	50	3	417	6.7288299	309607.1213	3388950.803
417	31.62000084	50	3	418	6.9414701	309657.1214	3388950.803
418	31.87666702	50	3	419	6.9619498	309707.1215	3388950.803
419	31.57999992	50	3	420	6.9335299	309757.1216	3388950.803
420	31.63800049	50	3	421	7.0026698	309807.1218	3388950.803
421	31.65999985	50	3	422	7.09551	309857.1219	3388950.803
422	31.81166649	50	3	423	7.22159	309907.122	3388950.803
423	32.11500168	50	3	424	7.48527	309957.1221	3388950.803
424	32.35142899	50	3	425	7.6547899	310007.1222	3388950.803
425	32.55799866	50	3	426	7.7975898	310057.1224	3388950.803
426	32.73500061	50	3	427	7.9667101	310107.1225	3388950.803
427	32.72999954	50	3	428	8.00105	310157.1226	3388950.803
428	32.9375	50	3	429	8.1070499	310207.1227	3388950.803
429	32.90599823	50	3	430	8.2230301	310257.1228	3388950.803
430	32.97499847	50	3	431	8.2870798	310307.123	3388950.803
431	33.18333435	50	3	432	8.4106197	310357.1231	3388950.803
432	33.17424393	50	3	433	8.4138603	310407.1232	3388950.803
433	33.13999939	50	3	434	8.4155102	310457.1233	3388950.803
434	33.14199829	50	3	435	8.4368896	310507.1234	3388950.803
435	33.20750046	50	3	436	8.4091902	310557.1235	3388950.803
436	33.05799866	50	3	437	8.3702698	310607.1237	3388950.803
437	33.20000076	50	3	438	8.3817101	310657.1238	3388950.803
438	33.16999817	50	3	439	8.3339596	310707.1239	3388950.803
439	33.04249954	50	3	440	8.2368097	310757.124	3388950.803
440	33.0019989	50	3	441	8.2550497	310807.1241	3388950.803
441	33.11500168	50	3	442	8.3065901	310857.1243	3388950.803
442	32.96250153	50	3	443	8.26723	310907.1244	3388950.803
443	32.99000168	50	3	444	8.2708797	310957.1245	3388950.803
444	32.91400146	50	3	445	8.2893801	311007.1246	3388950.803
445	32.97999954	50	3	446	8.3177004	311057.1247	3388950.803
446	33.24599838	50	3	447	8.5596104	311107.1249	3388950.803
447	34.53499985	50	3	448	8.4137497	311157.125	3388950.803
448	34.40200043	50	3	449	8.6420002	311207.1251	3388950.803
449	32.30250168	50	3	450	8.0077105	311257.1252	3388950.803
450	30.30249977	50	3	451	5.6610699	308507.1187	3388900.816
451	30.29400063	50	3	452	5.8758101	308557.1188	3388900.816
452	30.57250023	50	3	453	5.7653599	308607.1189	3388900.816
453	30.67000008	50	3	454	5.7644	308657.119	3388900.816
454	30.7266674	50	3	455	5.7313099	308707.1192	3388900.816
455	30.8239994	50	3	456	5.9103899	308757.1193	3388900.816
456	31.25600052	50	3	457	5.98209	308807.1194	3388900.816
457	31.56200027	50	3	458	6.4415998	308857.1195	3388900.816
458	31.33799934	50	3	459	6.8133202	308907.1196	3388900.816
459	31.72400093	50	3	460	6.8852	308957.1197	3388900.816
460	31.21999931	50	3	461	6.8305302	309007.1199	3388900.816
461	30.18000031	50	3	462	6.1501899	309057.12	3388900.816
462	30.28000069	50	3	463	5.6130199	309107.1201	3388900.816
463	28.03750038	50	3	464	4.45857	309157.1202	3388900.816
464	26.92000008	50	3	465	2.7500801	309207.1203	3388900.816
465	25.42749977	50	3	466	1.9255199	309257.1205	3388900.816
466	26.95000076	50	3	467	2.18384	309307.1206	3388900.816
467	27.05857086	50	3	468	2.37608	309357.1207	3388900.816
468	29.20000076	50	3	469	3.2049899	309407.1208	3388900.816
469	30.35199928	50	3	470	4.9822302	309457.1209	3388900.816
470	31.12599945	50	3	471	6.1100101	309507.1211	3388900.816
471	31.05599976	50	3	472	6.3755202	309557.1212	3388900.816
472	31.28333282	50	3	473	6.5861001	309607.1213	3388900.816
473	31.40749931	50	3	474	6.80264	309657.1214	3388900.816
474	31.53000069	50	3	475	6.7802801	309707.1215	3388900.816
475	31.52499962	50	3	476	6.80126	309757.1216	3388900.816
476	31.44000053	50	3	477	6.7931399	309807.1218	3388900.816
477	31.51600075	50	3	478	6.8045502	309857.1219	3388900.816
478	31.62166595	50	3	479	6.9372201	309907.122	3388900.816
479	31.91749954	50	3	480	7.2074699	309957.1221	3388900.816
480	32.10250092	50	3	481	7.4261799	310007.1222	3388900.816
481	32.27600098	50	3	482	7.6636901	310057.1224	3388900.816
482	32.56999969	50	3	483	7.8281002	310107.1225	3388900.816
483	32.73749924	50	3	484	7.9797101	310157.1226	3388900.816
484	32.93999863	50	3	485	8.0789299	310207.1227	3388900.816
485	32.88499832	50	3	486	8.1138401	310257.1228	3388900.816
486	33.04800034	50	3	487	8.2431402	310307.123	3388900.816
487	33.10499954	50	3	488	8.3669205	310357.1231	3388900.816
488	33.21749878	50	3	489	8.4171	310407.1232	3388900.816
489	33.15499878	50	3	490	8.3869696	310457.1233	3388900.816
490	33.02799988	50	3	491	8.4179497	310507.1234	3388900.816
491	33.97399902	50	3	492	8.5017595	310557.1235	3388900.816
492	33.17750168	50	3	493	8.3997698	310607.1237	3388900.816
493	33.01800156	50	3	494	8.30338	310657.1238	3388900.816
494	33.07799911	50	3	495	8.2669201	310707.1239	3388900.816
495	33.04000092	50	3	496	8.26196	310757.124	3388900.816
496	33.17200089	50	3	497	8.2875404	310807.1241	3388900.816
497	33.00400162	50	3	498	8.2289896	310857.1243	3388900.816
498	32.89599991	50	3	499	8.2175303	310907.1244	3388900.816
499	32.88600159	50	3	500	8.1753502	310957.1245	3388900.816
500	32.84799957	50	3	501	8.1610899	311007.1246	3388900.816
501	33.16833496	50	3	502	8.19767	311057.1247	3388900.816
502	32.75	50	3	503	8.1551199	311107.1249	3388900.816
503	33.11750031	50	3	504	8.5917902	311157.125	3388900.816
504	32.71749878	50	3	505	8.3795605	311207.1251	3388900.816
505	31.25	50	3	506	7.2030401	311257.1252	3388900.816
506	30.99500084	50	3	507	6.0089598	308457.1186	3388850.828
507	30.76499939	50	3	508	5.6194	308507.1187	3388850.828
508	31.1760006	50	3	509	5.86025	308557.1188	3388850.828
509	31.24600029	50	3	510	6.0560899	308607.1189	3388850.828
510	31.02249908	50	3	511	6.2593999	308657.119	3388850.828
511	30.79400063	50	3	512	6.3147001	308707.1192	3388850.828
512	30.65500069	50	3	513	6.3687801	308757.1193	3388850.828
513	30.75399971	50	3	514	6.3824601	308807.1194	3388850.828
514	31.45599937	50	3	515	6.44034	308857.1195	3388850.828
515	30.875	50	3	516	6.7102799	308907.1196	3388850.828
516	30.11333275	50	3	517	6.2744598	308957.1197	3388850.828
517	30.58333397	50	3	518	5.7276402	309007.1199	3388850.828
518	29.27000046	50	3	519	5.4309802	309057.12	3388850.828
519	27.95999908	50	3	520	4.2799602	309107.1201	3388850.828
520	26.64500046	50	3	521	2.6050999	309157.1202	3388850.828
521	25.94249916	50	3	522	1.84858	309207.1203	3388850.828
522	26.96199989	50	3	523	2.0253601	309257.1205	3388850.828
523	27.70499992	50	3	524	2.3580999	309307.1206	3388850.828
524	28.23999977	50	3	525	2.7635	309357.1207	3388850.828
525	30.36199951	50	3	526	4.6821599	309407.1208	3388850.828
526	31.28000069	50	3	527	6.2716599	309457.1209	3388850.828
527	31.125	50	3	528	6.4071102	309507.1211	3388850.828
528	31.14666748	50	3	529	6.3727198	309557.1212	3388850.828
529	31.20499992	50	3	530	6.4833899	309607.1213	3388850.828
530	31.29249954	50	3	531	6.6587501	309657.1214	3388850.828
531	31.2966671	50	3	532	6.6591201	309707.1215	3388850.828
532	31.40999985	50	3	533	6.6287298	309757.1216	3388850.828
533	31.38333321	50	3	534	6.6444998	309807.1218	3388850.828
534	31.38800049	50	3	535	6.7156501	309857.1219	3388850.828
535	31.50600052	50	3	536	6.7955599	309907.122	3388850.828
536	31.58250046	50	3	537	6.96277	309957.1221	3388850.828
537	31.73666573	50	3	538	7.2076101	310007.1222	3388850.828
538	32.09749985	50	3	539	7.4767299	310057.1224	3388850.828
539	32.40000153	50	3	540	7.6641402	310107.1225	3388850.828
540	32.59500122	50	3	541	7.86938	310157.1226	3388850.828
541	32.66500092	50	3	542	7.93929	310207.1227	3388850.828
542	32.75	50	3	543	8.0159597	310257.1228	3388850.828
543	32.75	50	3	544	8.1353703	310307.123	3388850.828
544	33.01200104	50	3	545	8.2878199	310357.1231	3388850.828
545	33.0019989	50	3	546	8.3704596	310407.1232	3388850.828
546	32.90750122	50	3	547	8.3859997	310457.1233	3388850.828
547	33.00999832	50	3	548	8.3071203	310507.1234	3388850.828
548	33.04000092	50	3	549	8.2520304	310557.1235	3388850.828
549	33.01499939	50	3	550	8.3634396	310607.1237	3388850.828
550	33.08499908	50	3	551	8.28442	310657.1238	3388850.828
551	32.87877655	50	3	552	8.3124304	310707.1239	3388850.828
552	32.93199921	50	3	553	8.2470398	310757.124	3388850.828
553	33.14400101	50	3	554	8.2865496	310807.1241	3388850.828
554	33.21500015	50	3	555	8.2751198	310857.1243	3388850.828
555	33.0719986	50	3	556	8.2478399	310907.1244	3388850.828
556	32.84000015	50	3	557	8.1610498	310957.1245	3388850.828
557	33.00999832	50	3	558	8.1663599	311007.1246	3388850.828
558	32.62833405	50	3	559	8.0958595	311057.1247	3388850.828
559	33.29800034	50	3	560	8.24895	311107.1249	3388850.828
560	32.54333496	50	3	561	7.77915	311157.125	3388850.828
561	31.95000076	50	3	562	7.1543002	311207.1251	3388850.828
562	32.90000153	50	3	563	7.9500399	311257.1252	3388850.828
563	32.25500107	50	3	564	8.0504198	311307.1253	3388850.828
564	30.16857147	50	3	565	5.9651098	308407.1184	3388800.84
565	30.36142921	50	3	566	6.2897201	308457.1186	3388800.84
566	30.45571518	50	3	567	6.3884001	308507.1187	3388800.84
567	30.72999954	50	3	568	6.2923799	308557.1188	3388800.84
568	30.79400063	50	3	569	6.1217198	308607.1189	3388800.84
569	30.79500008	50	3	570	5.9808602	308657.119	3388800.84
570	30.97750092	50	3	571	6.1196699	308707.1192	3388800.84
571	30.82857132	50	3	572	6.2122302	308757.1193	3388800.84
572	30.36166573	50	3	573	6.23913	308807.1194	3388800.84
573	30.20800018	50	3	574	5.9973698	308857.1195	3388800.84
574	30.74749947	50	3	575	5.73241	308907.1196	3388800.84
575	29.82749939	50	3	576	5.67099	308957.1197	3388800.84
576	28.22999954	50	3	577	5.1194401	309007.1199	3388800.84
577	27.26399994	50	3	578	3.48562	309057.12	3388800.84
578	26.40500069	50	3	579	2.2120199	309107.1201	3388800.84
579	26.05999947	50	3	580	1.77596	309157.1202	3388800.84
580	26.88999939	50	3	581	1.76978	309207.1203	3388800.84
581	27.11000061	50	3	582	2.23332	309257.1205	3388800.84
582	28.66399956	50	3	583	3.12343	309307.1206	3388800.84
583	28.69333267	50	3	584	3.5796499	309357.1207	3388800.84
584	30.72249985	50	3	585	5.5683599	309407.1208	3388800.84
585	31.23250008	50	3	586	6.5483699	309457.1209	3388800.84
586	31.12274361	50	3	587	6.4568801	309507.1211	3388800.84
587	31.04999924	50	3	588	6.3639202	309557.1212	3388800.84
588	31.23500061	50	3	589	6.4570999	309607.1213	3388800.84
589	31.34499931	50	3	590	6.4899101	309657.1214	3388800.84
590	31.27199936	50	3	591	6.5620799	309707.1215	3388800.84
591	31.38599968	50	3	592	6.6005602	309757.1216	3388800.84
592	31.31833267	50	3	593	6.6176701	309807.1218	3388800.84
593	31.41399956	50	3	594	6.6367898	309857.1219	3388800.84
594	31.36249924	50	3	595	6.6882601	309907.122	3388800.84
595	31.49749947	50	3	596	6.6961002	309957.1221	3388800.84
596	31.45999908	50	3	597	6.8665099	310007.1222	3388800.84
597	31.83166695	50	3	598	7.2417898	310057.1224	3388800.84
598	32.19200134	50	3	599	7.5434999	310107.1225	3388800.84
599	32.49333191	50	3	600	7.7238498	310157.1226	3388800.84
600	32.56999969	50	3	601	7.8387499	310207.1227	3388800.84
601	32.64749908	50	3	602	7.95082	310257.1228	3388800.84
602	32.74599838	50	3	603	8.0639095	310307.123	3388800.84
603	32.73749924	50	3	604	8.1212502	310357.1231	3388800.84
604	32.81999969	50	3	605	8.1436996	310407.1232	3388800.84
605	32.93000031	50	3	606	8.1202803	310457.1233	3388800.84
606	32.88999939	50	3	607	8.1451797	310507.1234	3388800.84
607	32.86500168	50	3	608	8.1938696	310557.1235	3388800.84
608	32.88750076	50	3	609	8.2012701	310607.1237	3388800.84
609	32.96749878	50	3	610	8.2264605	310657.1238	3388800.84
610	32.92200089	50	3	611	8.2209597	310707.1239	3388800.84
611	32.94666672	50	3	612	8.2028799	310757.124	3388800.84
612	32.93199921	50	3	613	8.1977797	310807.1241	3388800.84
613	32.91799927	50	3	614	8.2446604	310857.1243	3388800.84
614	32.89500046	50	3	615	8.1765404	310907.1244	3388800.84
615	32.86666489	50	3	616	8.1601496	310957.1245	3388800.84
616	33.22999954	50	3	617	8.1318302	311007.1246	3388800.84
617	32.65499878	50	3	618	7.9622998	311057.1247	3388800.84
618	33.08499908	50	3	619	8.0892096	311107.1249	3388800.84
619	33.00166702	50	3	620	7.8544502	311157.125	3388800.84
620	32.45750046	50	3	621	7.6265302	311207.1251	3388800.84
621	32.85800171	50	3	622	8.1483402	311257.1252	3388800.84
622	32.04199982	50	3	623	7.3867898	311307.1253	3388800.84
623	31.13333321	50	3	624	6.4163299	311357.1254	3388800.84
624	28.51874924	50	3	625	5.1454301	308357.1183	3388750.852
625	29.09166718	50	3	626	5.5770702	308407.1184	3388750.852
626	29.36124992	50	3	627	5.6811399	308457.1186	3388750.852
627	30.05500031	50	3	628	5.6024199	308507.1187	3388750.852
628	30.43000031	50	3	629	5.5461102	308557.1188	3388750.852
629	29.64624977	50	3	630	5.6835599	308607.1189	3388750.852
630	30.45857048	50	3	631	5.8880301	308657.119	3388750.852
631	30.48624992	50	3	632	5.86831	308707.1192	3388750.852
632	30.21375084	50	3	633	5.6849699	308757.1193	3388750.852
633	29.13166618	50	3	634	5.3915601	308807.1194	3388750.852
634	29.11666679	50	3	635	5.5857801	308857.1195	3388750.852
635	28.09714317	50	3	636	4.9828801	308907.1196	3388750.852
636	27.50600052	50	3	637	3.5523	308957.1197	3388750.852
637	26.87375069	50	3	638	2.8527	309007.1199	3388750.852
638	26.12571335	50	3	639	2.07392	309057.12	3388750.852
639	25.96142769	50	3	640	1.32999	309107.1201	3388750.852
640	26.59142876	50	3	641	1.53424	309157.1202	3388750.852
641	26.98749924	50	3	642	2.0437801	309207.1203	3388750.852
642	28.5783329	50	3	643	2.6988299	309257.1205	3388750.852
643	30.27571487	50	3	644	4.5214701	309307.1206	3388750.852
644	30.5783329	50	3	645	5.29421	309357.1207	3388750.852
645	29.61249924	50	3	646	5.0637202	309407.1208	3388750.852
646	30.92250061	50	3	647	6.2995	309457.1209	3388750.852
647	30.91888809	50	3	648	6.3657498	309507.1211	3388750.852
648	30.97333336	50	3	649	6.3365598	309557.1212	3388750.852
649	31.04375076	50	3	650	6.37006	309607.1213	3388750.852
650	31.05333328	50	3	651	6.4383001	309657.1214	3388750.852
651	31.29571342	50	3	652	6.59058	309707.1215	3388750.852
652	31.31399918	50	3	653	6.6282301	309757.1216	3388750.852
653	31.36333275	50	3	654	6.6248002	309807.1218	3388750.852
654	31.44499969	50	3	655	6.6545501	309857.1219	3388750.852
655	31.33749962	50	3	656	6.6553302	309907.122	3388750.852
656	31.37000084	50	3	657	6.6522398	309957.1221	3388750.852
657	31.34749985	50	3	658	6.6644201	310007.1222	3388750.852
658	31.90999985	50	3	659	6.9672599	310057.1224	3388750.852
659	32.04999924	50	3	660	7.3902001	310107.1225	3388750.852
660	32.45000076	50	3	661	7.7176099	310157.1226	3388750.852
661	32.45999908	50	3	662	7.8206301	310207.1227	3388750.852
662	32.66749954	50	3	663	7.9359698	310257.1228	3388750.852
663	32.68500137	50	3	664	8.0295095	310307.123	3388750.852
664	33.15000153	50	3	665	8.0704603	310357.1231	3388750.852
665	32.82249832	50	3	666	8.1008997	310407.1232	3388750.852
666	32.85333252	50	3	667	8.1132402	310457.1233	3388750.852
667	33.01750183	50	3	668	8.11658	310507.1234	3388750.852
668	32.81000137	50	3	669	8.1533604	310557.1235	3388750.852
669	32.94400024	50	3	670	8.1949997	310607.1237	3388750.852
670	32.87599945	50	3	671	8.14958	310657.1238	3388750.852
671	32.79750061	50	3	672	8.1408901	310707.1239	3388750.852
672	32.85400009	50	3	673	8.14433	310757.124	3388750.852
673	32.81750107	50	3	674	8.17591	310807.1241	3388750.852
674	32.81499863	50	3	675	8.1700296	310857.1243	3388750.852
675	32.81499863	50	3	676	8.16677	310907.1244	3388750.852
676	33.01750183	50	3	677	8.1611795	310957.1245	3388750.852
677	32.88807678	50	3	678	8.1036596	311007.1246	3388750.852
678	33.19749832	50	3	679	7.9784598	311057.1247	3388750.852
679	32.99750137	50	3	680	8.2125101	311107.1249	3388750.852
680	33.13119888	50	3	681	8.3361301	311157.125	3388750.852
681	32.26750183	50	3	682	7.8886099	311207.1251	3388750.852
682	32.61399841	50	3	683	7.9195399	311257.1252	3388750.852
683	32.84928894	50	3	684	7.6169901	311307.1253	3388750.852
684	32.13850021	50	3	685	6.8571901	311357.1254	3388750.852
685	31.87199974	50	3	686	6.53374	311407.1256	3388750.852
686	26.76625061	50	3	687	2.62309	308307.1182	3388700.865
687	27.05142784	50	3	688	2.8859301	308357.1183	3388700.865
688	27.08833313	50	3	689	3.1154499	308407.1184	3388700.865
689	27.36874962	50	3	690	3.3517201	308457.1186	3388700.865
690	27.44000053	50	3	691	3.5230401	308507.1187	3388700.865
691	27.41666603	50	3	692	4.15628	308557.1188	3388700.865
692	28.07250023	50	3	693	3.9958899	308607.1189	3388700.865
693	27.73125076	50	3	694	4.3016701	308657.119	3388700.865
694	27.80125046	50	3	695	4.3562598	308707.1192	3388700.865
695	27.67499924	50	3	696	3.8299201	308757.1193	3388700.865
696	27.44375038	50	3	697	3.17365	308807.1194	3388700.865
697	26.88999939	50	3	698	2.75457	308857.1195	3388700.865
698	26.82666588	50	3	699	2.51368	308907.1196	3388700.865
699	26.37125015	50	3	700	2.28058	308957.1197	3388700.865
700	25.66222191	50	3	701	1.6962399	309007.1199	3388700.865
701	26.16749954	50	3	702	1.15775	309057.12	3388700.865
702	26.54000092	50	3	703	1.68672	309107.1201	3388700.865
703	27.34000015	50	3	704	1.98037	309157.1202	3388700.865
704	29.30125046	50	3	705	3.14886	309207.1203	3388700.865
705	30.46624947	50	3	706	4.8905301	309257.1205	3388700.865
706	31.0342865	50	3	707	6.0409198	309307.1206	3388700.865
707	30.88500023	50	3	708	6.0948901	309357.1207	3388700.865
708	30.4766674	50	3	709	5.6248398	309407.1208	3388700.865
709	29.52571487	50	3	710	5.2020502	309457.1209	3388700.865
710	30.81714249	50	3	711	6.1778898	309507.1211	3388700.865
711	31.01000023	50	3	712	6.28157	309557.1212	3388700.865
712	31.06714249	50	3	713	6.3650298	309607.1213	3388700.865
713	31.05166626	50	3	714	6.37359	309657.1214	3388700.865
714	31.73500061	50	3	715	6.65488	309707.1215	3388700.865
715	31.98999977	50	3	716	7.21983	309757.1216	3388700.865
716	32.1771431	50	3	717	7.5362	309807.1218	3388700.865
717	32.13499832	50	3	718	6.9812498	309857.1219	3388700.865
718	31.35857201	50	3	719	6.6380601	309907.122	3388700.865
719	31.29000092	50	3	720	6.6688199	309957.1221	3388700.865
720	31.37000084	50	3	721	6.64289	310007.1222	3388700.865
721	31.32999992	50	3	722	6.65556	310057.1224	3388700.865
722	31.67499924	50	3	723	7.2242599	310107.1225	3388700.865
723	32.54750061	50	3	724	7.5917201	310157.1226	3388700.865
724	32.45999908	50	3	725	7.7863202	310207.1227	3388700.865
725	32.67856979	50	3	726	7.95223	310257.1228	3388700.865
726	32.76499939	50	3	727	8.0370398	310307.123	3388700.865
727	32.88624954	50	3	728	8.1697598	310357.1231	3388700.865
728	32.86500168	50	3	729	8.1171303	310407.1232	3388700.865
729	32.81000137	50	3	730	8.1375904	310457.1233	3388700.865
730	32.83000183	50	3	731	8.1046305	310507.1234	3388700.865
731	32.78625107	50	3	732	8.1016998	310557.1235	3388700.865
732	32.80333328	50	3	733	8.1648703	310607.1237	3388700.865
733	32.80428696	50	3	734	8.1289501	310657.1238	3388700.865
734	32.83142853	50	3	735	8.1364603	310707.1239	3388700.865
735	32.94200134	50	3	736	8.0921698	310757.124	3388700.865
736	32.82333374	50	3	737	8.1141701	310807.1241	3388700.865
737	32.84666824	50	3	738	8.1343002	310857.1243	3388700.865
738	32.81222153	50	3	739	8.1297102	310907.1244	3388700.865
739	32.84833145	50	3	740	8.1451998	310957.1245	3388700.865
740	32.89333344	50	3	741	8.1314201	311007.1246	3388700.865
741	32.88874817	50	3	742	8.3065701	311057.1247	3388700.865
742	33.06800079	50	3	743	8.21698	311107.1249	3388700.865
743	32.86999893	50	3	744	8.2228899	311157.125	3388700.865
744	32.99837112	50	3	745	8.2280302	311207.1251	3388700.865
745	32.88499832	50	3	746	8.0680799	311257.1252	3388700.865
746	32.83499908	50	3	747	8.2310801	311307.1253	3388700.865
747	32.58833313	50	3	748	8.1043997	311357.1254	3388700.865
748	32.3443718	50	3	749	7.4465899	311407.1256	3388700.865
749	24.06333351	50	3	750	-0.629189	308257.1181	3388650.877
750	23.30999947	50	3	751	0.474449	308307.1182	3388650.877
751	25.71500015	50	3	752	1.8349299	308357.1183	3388650.877
752	26.15875053	50	3	753	1.89061	308407.1184	3388650.877
753	26.0625	50	3	754	1.9258699	308457.1186	3388650.877
754	26.04000092	50	3	755	1.92249	308507.1187	3388650.877
755	26.1442852	50	3	756	2.02198	308557.1188	3388650.877
756	26.39599991	50	3	757	2.37865	308607.1189	3388650.877
757	26.28142929	50	3	758	2.33112	308657.119	3388650.877
758	26.42399979	50	3	759	2.34623	308707.1192	3388650.877
759	26.16500092	50	3	760	2.25209	308757.1193	3388650.877
760	26.05374908	50	3	761	1.92222	308807.1194	3388650.877
761	25.90999985	50	3	762	1.6851	308857.1195	3388650.877
762	25.50875092	50	3	763	1.50286	308907.1196	3388650.877
763	25.64777756	50	3	764	0.957098	308957.1197	3388650.877
764	26.41714287	50	3	765	1.21162	309007.1199	3388650.877
765	27.02714348	50	3	766	1.75718	309057.12	3388650.877
766	28.2183342	50	3	767	2.56376	309107.1201	3388650.877
767	30.38999939	50	3	768	3.8382699	309157.1202	3388650.877
768	31.02599907	50	3	769	5.7547002	309207.1203	3388650.877
769	31.69000053	50	3	770	6.6340599	309257.1205	3388650.877
770	31.19249916	50	3	771	6.4876699	309307.1206	3388650.877
771	30.88249969	50	3	772	6.3255601	309357.1207	3388650.877
772	30.78199959	50	3	773	6.0212002	309407.1208	3388650.877
773	30.4533329	50	3	774	5.6093602	309457.1209	3388650.877
774	30.49571419	50	3	775	5.9945998	309507.1211	3388650.877
775	30.81444359	50	3	776	6.2511201	309557.1212	3388650.877
776	31.26250076	50	3	777	6.32096	309607.1213	3388650.877
777	31.12285805	50	3	778	6.3842402	309657.1214	3388650.877
778	31.18000031	50	3	779	6.4065499	309707.1215	3388650.877
779	31.02799988	50	3	780	7.0405598	309757.1216	3388650.877
780	32.44200134	50	3	781	7.8123398	309807.1218	3388650.877
781	32.6483345	50	3	782	7.7494402	309857.1219	3388650.877
782	32.27500153	50	3	783	7.2459302	309907.122	3388650.877
783	31.34250069	50	3	784	6.6543999	309957.1221	3388650.877
784	31.43499947	50	3	785	6.7112999	310007.1222	3388650.877
785	31.36666679	50	3	786	6.6607199	310057.1224	3388650.877
786	31.64714241	50	3	787	6.8667002	310107.1225	3388650.877
787	32.15999985	50	3	788	7.4022298	310157.1226	3388650.877
788	32.41400146	50	3	789	7.7565598	310207.1227	3388650.877
789	32.58124924	50	3	790	7.9632301	310257.1228	3388650.877
790	32.86285782	50	3	791	8.0717497	310307.123	3388650.877
791	32.79000092	50	3	792	8.1249304	310357.1231	3388650.877
792	32.82749939	50	3	793	8.1441698	310407.1232	3388650.877
793	32.79624939	50	3	794	8.13659	310457.1233	3388650.877
794	32.80199814	50	3	795	8.1933603	310507.1234	3388650.877
795	32.84500122	50	3	796	8.1182203	310557.1235	3388650.877
796	32.72857285	50	3	797	8.0922003	310607.1237	3388650.877
797	32.75333405	50	3	798	8.1205502	310657.1238	3388650.877
798	32.75	50	3	799	8.1406002	310707.1239	3388650.877
799	32.82374954	50	3	800	8.1051197	310757.124	3388650.877
800	32.72999954	50	3	801	8.1588202	310807.1241	3388650.877
801	32.87428665	50	3	802	8.1054602	310857.1243	3388650.877
802	32.81375122	50	3	803	8.0911503	310907.1244	3388650.877
803	32.84999847	50	3	804	8.1351099	310957.1245	3388650.877
804	32.72750092	50	3	805	8.1186304	311007.1246	3388650.877
805	32.61857224	50	3	806	8.1003904	311057.1247	3388650.877
806	32.6414299	50	3	807	7.9085598	311107.1249	3388650.877
807	32.32333374	50	3	808	7.97331	311157.125	3388650.877
808	32.61500168	50	3	809	8.0810404	311207.1251	3388650.877
809	32.70399857	50	3	810	7.99681	311257.1252	3388650.877
810	32.84428406	50	3	811	7.99367	311307.1253	3388650.877
811	32.72000122	50	3	812	8.0533504	311357.1254	3388650.877
812	32.86875153	50	3	813	7.9624	311407.1256	3388650.877
813	33.09125137	50	3	814	8.19135	311457.1257	3388650.877
814	27.79750061	50	3	815	2.23914	308157.1178	3388600.889
815	26.53499985	50	3	816	1.21504	308207.118	3388600.889
816	27.23999977	50	3	817	1.30494	308257.1181	3388600.889
817	27.04000092	50	3	818	-0.328857	308307.1182	3388600.889
818	25.87375069	50	3	819	-0.434568	308357.1183	3388600.889
819	24.76111031	50	3	820	-0.0647526	308407.1184	3388600.889
820	24.85750008	50	3	821	-0.1506	308457.1186	3388600.889
821	24.49777794	50	3	822	-0.0117683	308507.1187	3388600.889
822	24.60124969	50	3	823	0.257547	308557.1188	3388600.889
823	24.41666603	50	3	824	0.156654	308607.1189	3388600.889
824	24.02499962	50	3	825	0.806986	308657.119	3388600.889
825	24.19000053	50	3	826	0.398712	308707.1192	3388600.889
826	25.05400085	50	3	827	1.20485	308757.1193	3388600.889
827	25.17749977	50	3	828	1.02676	308807.1194	3388600.889
828	25.96999931	50	3	829	0.695309	308857.1195	3388600.889
829	26.45874977	50	3	830	1.03061	308907.1196	3388600.889
830	27.08833313	50	3	831	1.48217	308957.1197	3388600.889
831	27.95666695	50	3	832	2.1489999	309007.1199	3388600.889
832	29.91500092	50	3	833	3.3021901	309057.12	3388600.889
833	31.45599937	50	3	834	4.7895498	309107.1201	3388600.889
834	31.51799965	50	3	835	6.70227	309157.1202	3388600.889
835	31.48857117	50	3	836	6.6793699	309207.1203	3388600.889
836	31.28833389	50	3	837	6.6578102	309257.1205	3388600.889
837	31.43428612	50	3	838	6.7396498	309307.1206	3388600.889
838	30.93000031	50	3	839	6.3177299	309357.1207	3388600.889
839	30.96999931	50	3	840	6.1958899	309407.1208	3388600.889
840	30.75857162	50	3	841	6.0610399	309457.1209	3388600.889
841	30.14333344	50	3	842	5.7707	309507.1211	3388600.889
842	30.79428482	50	3	843	6.1200199	309557.1212	3388600.889
843	30.91875076	50	3	844	6.2558999	309607.1213	3388600.889
844	30.97750092	50	3	845	6.3535399	309657.1214	3388600.889
845	31.12714195	50	3	846	6.4108901	309707.1215	3388600.889
846	31.18333244	50	3	847	6.42766	309757.1216	3388600.889
847	31.08142853	50	3	848	6.9521198	309807.1218	3388600.889
848	31.66374969	50	3	849	7.49827	309857.1219	3388600.889
849	32.27999878	50	3	850	7.5770602	309907.122	3388600.889
850	31.22374916	50	3	851	6.6816602	309957.1221	3388600.889
851	31.44199944	50	3	852	6.7220898	310007.1222	3388600.889
852	31.39749908	50	3	853	6.7038298	310057.1224	3388600.889
853	31.33142853	50	3	854	6.7153902	310107.1225	3388600.889
854	31.93499947	50	3	855	7.2787499	310157.1226	3388600.889
855	32.49000168	50	3	856	7.7279601	310207.1227	3388600.889
856	32.63999939	50	3	857	7.9397898	310257.1228	3388600.889
857	32.19285583	50	3	858	8.1068201	310307.123	3388600.889
858	32.86750031	50	3	859	8.1491899	310357.1231	3388600.889
859	32.8125	50	3	860	8.1833601	310407.1232	3388600.889
860	32.88375092	50	3	861	8.1862297	310457.1233	3388600.889
861	32.87714386	50	3	862	8.1700201	310507.1234	3388600.889
862	32.7733345	50	3	863	8.1872702	310557.1235	3388600.889
863	32.97142792	50	3	864	8.1554098	310607.1237	3388600.889
864	32.90499878	50	3	865	8.13239	310657.1238	3388600.889
865	32.67571259	50	3	866	8.0845203	310707.1239	3388600.889
866	32.70571518	50	3	867	8.0356503	310757.124	3388600.889
867	32.61375046	50	3	868	8.0284405	310807.1241	3388600.889
868	32.61285782	50	3	869	8.00492	310857.1243	3388600.889
869	32.74571609	50	3	870	8.07024	310907.1244	3388600.889
870	32.81375122	50	3	871	8.1571503	310957.1245	3388600.889
871	32.72999954	50	3	872	8.1206198	311007.1246	3388600.889
872	32.65375137	50	3	873	8.0066996	311057.1247	3388600.889
873	32.81499863	50	3	874	7.9090099	311107.1249	3388600.889
874	32.59999847	50	3	875	7.7825198	311157.125	3388600.889
875	32.51124954	50	3	876	7.88627	311207.1251	3388600.889
876	32.58000183	50	3	877	8.0829697	311257.1252	3388600.889
877	32.72124863	50	3	878	8.1749802	311307.1253	3388600.889
878	32.625	50	3	879	8.1087599	311357.1254	3388600.889
879	32.68624878	50	3	880	7.9661498	311407.1256	3388600.889
880	32.7733345	50	3	881	7.9730802	311457.1257	3388600.889
881	30.82333374	50	3	882	6.2097101	308057.1176	3388550.901
882	30.29599953	50	3	883	5.4596901	308107.1177	3388550.901
883	30.18000031	50	3	884	4.7980599	308157.1178	3388550.901
884	29.59799957	50	3	885	3.7356	308207.118	3388550.901
885	30.7266674	50	3	886	4.1374102	308257.1181	3388550.901
886	29.97249985	50	3	887	3.7699299	308307.1182	3388550.901
887	29.50250053	50	3	888	3.05144	308357.1183	3388550.901
888	28.79400063	50	3	889	2.22595	308407.1184	3388550.901
889	28.2840004	50	3	890	1.60796	308457.1186	3388550.901
890	27.53000069	50	3	891	1.3785	308507.1187	3388550.901
891	27.12999916	50	3	892	1.00761	308557.1188	3388550.901
892	27.09666634	50	3	893	0.714802	308607.1189	3388550.901
893	26.75875092	50	3	894	0.612413	308657.119	3388550.901
894	26.81888962	50	3	895	0.974873	308707.1192	3388550.901
895	26.92142868	50	3	896	1.09171	308757.1193	3388550.901
896	27.13999939	50	3	897	1.27588	308807.1194	3388550.901
897	27.70800018	50	3	898	1.87541	308857.1195	3388550.901
898	28.54750061	50	3	899	2.6843801	308907.1196	3388550.901
899	30.03000069	50	3	900	3.2769899	308957.1197	3388550.901
900	30.09874916	50	3	901	4.8533001	309007.1199	3388550.901
901	31.61874962	50	3	902	6.41887	309057.12	3388550.901
902	31.95499992	50	3	903	7.1939902	309107.1201	3388550.901
903	32.03666687	50	3	904	7.1149502	309157.1202	3388550.901
904	31.57999992	50	3	905	6.8842802	309207.1203	3388550.901
905	31.49500084	50	3	906	6.6824298	309257.1205	3388550.901
906	31.19499969	50	3	907	6.6729002	309307.1206	3388550.901
907	30.93199921	50	3	908	6.4051199	309357.1207	3388550.901
908	30.90999985	50	3	909	6.2012401	309407.1208	3388550.901
909	30.99749947	50	3	910	6.1436	309457.1209	3388550.901
910	30.61499977	50	3	911	5.9911098	309507.1211	3388550.901
911	30.64966774	50	3	912	6.0606599	309557.1212	3388550.901
912	30.79999924	50	3	913	6.2165599	309607.1213	3388550.901
913	31.00499916	50	3	914	6.3556399	309657.1214	3388550.901
914	31.10750008	50	3	915	6.41536	309707.1215	3388550.901
915	31.22999954	50	3	916	6.4349599	309757.1216	3388550.901
916	31.10666656	50	3	917	6.43258	309807.1218	3388550.901
917	31.13277245	50	3	918	6.54989	309857.1219	3388550.901
918	31.64249992	50	3	919	7.22616	309907.122	3388550.901
919	31.62999916	50	3	920	6.9857702	309957.1221	3388550.901
920	31.41749954	50	3	921	6.6761498	310007.1222	3388550.901
921	31.36249924	50	3	922	6.7186198	310057.1224	3388550.901
922	31.29000092	50	3	923	6.7142	310107.1225	3388550.901
923	31.91166687	50	3	924	7.2105999	310157.1226	3388550.901
924	32.36833191	50	3	925	7.6778798	310207.1227	3388550.901
925	32.58285904	50	3	926	7.9323101	310257.1228	3388550.901
926	32.79750061	50	3	927	8.0655603	310307.123	3388550.901
927	32.79499817	50	3	928	8.1757202	310357.1231	3388550.901
928	33.22249985	50	3	929	8.1738701	310407.1232	3388550.901
929	32.80166626	50	3	930	8.2059603	310457.1233	3388550.901
930	32.79000092	50	3	931	8.1690598	310507.1234	3388550.901
931	32.90000153	50	3	932	8.1824903	310557.1235	3388550.901
932	32.81000137	50	3	933	8.2176199	310607.1237	3388550.901
933	32.80250168	50	3	934	8.1641102	310657.1238	3388550.901
934	32.95500183	50	3	935	7.9964499	310707.1239	3388550.901
935	32.64749908	50	3	936	8.0704699	310757.124	3388550.901
936	32.67499924	50	3	937	8.0184202	310807.1241	3388550.901
937	32.80500031	50	3	938	8.04533	310857.1243	3388550.901
938	32.65599823	50	3	939	8.0148001	310907.1244	3388550.901
939	33.09000015	50	3	940	8.0640001	310957.1245	3388550.901
940	32.79999924	50	3	941	8.1789598	311007.1246	3388550.901
941	32.7626152	50	3	942	8.1180296	311057.1247	3388550.901
942	32.79999924	50	3	943	8.01159	311107.1249	3388550.901
943	32.44499969	50	3	944	7.8027601	311157.125	3388550.901
944	32.50166702	50	3	945	7.8339701	311207.1251	3388550.901
945	32.375	50	3	946	7.8601699	311257.1252	3388550.901
946	32.70000076	50	3	947	7.9066801	311307.1253	3388550.901
947	32.25258255	50	3	948	7.65342	311357.1254	3388550.901
948	31.4642849	50	3	949	7.4528399	311407.1256	3388550.901
949	30.52750015	50	3	950	7.1011801	311457.1257	3388550.901
950	30.80750084	50	3	951	6.0106301	308007.1175	3388500.914
951	30.76000023	50	3	952	6.2090101	308057.1176	3388500.914
952	29.93666649	50	3	953	5.8018198	308107.1177	3388500.914
953	30.5783329	50	3	954	5.4872298	308157.1178	3388500.914
954	32.00500107	50	3	955	6.24651	308207.118	3388500.914
955	32.15999985	50	3	956	7.4520502	308257.1181	3388500.914
956	32.08666611	50	3	957	7.1517501	308307.1182	3388500.914
957	32.00999832	50	3	958	6.93401	308357.1183	3388500.914
958	31.76250076	50	3	959	6.2414498	308407.1184	3388500.914
959	31.95249939	50	3	960	6.0037198	308457.1186	3388500.914
960	31.33250046	50	3	961	5.2326398	308507.1187	3388500.914
961	31.16399956	50	3	962	4.4498401	308557.1188	3388500.914
962	30.78499985	50	3	963	4.11415	308607.1189	3388500.914
963	30.47750092	50	3	964	3.65136	308657.119	3388500.914
964	30.03333282	50	3	965	3.6180799	308707.1192	3388500.914
965	30.53903198	50	3	966	3.8806901	308757.1193	3388500.914
966	29.93400002	50	3	967	4.0172	308807.1194	3388500.914
967	29.95400047	50	3	968	3.81868	308857.1195	3388500.914
968	31.29500008	50	3	969	6.0641499	308907.1196	3388500.914
969	31.49833298	50	3	970	6.6768899	308957.1197	3388500.914
970	31.58250046	50	3	971	6.8583102	309007.1199	3388500.914
971	31.12999916	50	3	972	6.6097498	309057.12	3388500.914
972	31.42333412	50	3	973	7.0610299	309107.1201	3388500.914
973	31.80249977	50	3	974	7.3136702	309157.1202	3388500.914
974	31.61499977	50	3	975	6.7784801	309207.1203	3388500.914
975	31.84000015	50	3	976	7.13519	309257.1205	3388500.914
976	31.19000053	50	3	977	6.6034999	309307.1206	3388500.914
977	31.34000015	50	3	978	6.6130099	309357.1207	3388500.914
978	31.20000076	50	3	979	6.2221899	309407.1208	3388500.914
979	30.82666588	50	3	980	6.2121	309457.1209	3388500.914
980	30.6875	50	3	981	6.1075101	309507.1211	3388500.914
981	30.61000061	50	3	982	6.02952	309557.1212	3388500.914
982	30.69000053	50	3	983	6.11976	309607.1213	3388500.914
983	30.93250084	50	3	984	6.35781	309657.1214	3388500.914
984	30.99399948	50	3	985	6.4125199	309707.1215	3388500.914
985	31.17000008	50	3	986	6.4455299	309757.1216	3388500.914
986	31.17000008	50	3	987	6.4727101	309807.1218	3388500.914
987	31.12249947	50	3	988	6.46702	309857.1219	3388500.914
988	31.06999969	50	3	989	6.5026898	309907.122	3388500.914
989	31.50200081	50	3	990	6.9689698	309957.1221	3388500.914
990	31.24666595	50	3	991	6.6458802	310007.1222	3388500.914
991	31.30999947	50	3	992	6.6489902	310057.1224	3388500.914
992	31.30999947	50	3	993	6.6914001	310107.1225	3388500.914
993	31.87333298	50	3	994	7.17734	310157.1226	3388500.914
994	32.38249969	50	3	995	7.6854601	310207.1227	3388500.914
995	32.63499832	50	3	996	7.9526601	310257.1228	3388500.914
996	32.8125	50	3	997	8.1843796	310307.123	3388500.914
997	32.88000107	50	3	998	8.2039099	310357.1231	3388500.914
998	32.75999832	50	3	999	8.1095695	310407.1232	3388500.914
999	32.75999832	50	3	1000	8.2051697	310457.1233	3388500.914
1000	33.00500107	50	3	1001	8.1357498	310507.1234	3388500.914
1001	32.93333435	50	3	1002	8.2320299	310557.1235	3388500.914
1002	32.88499832	50	3	1003	8.1735096	310607.1237	3388500.914
1003	32.88750076	50	3	1004	8.1862803	310657.1238	3388500.914
1004	32.70999908	50	3	1005	8.0156603	310707.1239	3388500.914
1005	32.63000107	50	3	1006	8.0349398	310757.124	3388500.914
1006	32.54499817	50	3	1007	8.0526505	310807.1241	3388500.914
1007	32.53250122	50	3	1008	8.0858698	310857.1243	3388500.914
1008	32.62599945	50	3	1009	8.0316401	310907.1244	3388500.914
1009	32.5320015	50	3	1010	8.1175804	310957.1245	3388500.914
1010	32.66333389	50	3	1011	8.1467199	311007.1246	3388500.914
1011	32.66333389	50	3	1012	8.04457	311057.1247	3388500.914
1012	32.5	50	3	1013	8.0548801	311107.1249	3388500.914
1013	32.41999817	50	3	1014	7.78866	311157.125	3388500.914
1014	32.36600113	50	3	1015	7.7449398	311207.1251	3388500.914
1015	32.49499893	50	3	1016	7.7631798	311257.1252	3388500.914
1016	32.72999954	50	3	1017	8.0718603	311307.1253	3388500.914
1017	32.75799942	50	3	1018	8.0254898	311357.1254	3388500.914
1018	32.61500168	50	3	1019	7.6830101	311407.1256	3388500.914
1019	31.50749969	50	3	1020	6.2287202	311457.1257	3388500.914
1020	30.45999908	50	3	1021	6.36976	308007.1175	3388450.926
1021	30.44160652	50	3	1022	5.79001	308057.1176	3388450.926
1022	31.70400047	50	3	1023	5.7717199	308107.1177	3388450.926
1023	31.90999985	50	3	1024	6.9732299	308157.1178	3388450.926
1024	32.22333145	50	3	1025	7.4317799	308207.118	3388450.926
1025	31.18499947	50	3	1026	7.1089101	308257.1181	3388450.926
1026	32.13999939	50	3	1027	7.5061898	308307.1182	3388450.926
1027	31.63500023	50	3	1028	7.4699998	308357.1183	3388450.926
1028	31.67749977	50	3	1029	7.2442198	308407.1184	3388450.926
1029	31.83333397	50	3	1030	7.1676302	308457.1186	3388450.926
1030	31.64999962	50	3	1031	7.1012702	308507.1187	3388450.926
1031	32.08333206	50	3	1032	7.3667798	308557.1188	3388450.926
1032	31.95199966	50	3	1033	7.3237901	308607.1189	3388450.926
1033	31.76000023	50	3	1034	7.0774002	308657.119	3388450.926
1034	31.86750031	50	3	1035	6.9783401	308707.1192	3388450.926
1035	32.01800156	50	3	1036	7.23001	308757.1193	3388450.926
1036	32.18500137	50	3	1037	6.73703	308807.1194	3388450.926
1037	30.80249977	50	3	1038	6.1101098	308857.1195	3388450.926
1038	31.3283329	50	3	1039	6.5465698	308907.1196	3388450.926
1039	31.26199913	50	3	1040	6.7957001	308957.1197	3388450.926
1040	31.40961075	50	3	1041	7.1883402	309007.1199	3388450.926
1041	31.93250084	50	3	1042	6.9142199	309057.12	3388450.926
1042	31.0466671	50	3	1043	6.4889898	309107.1201	3388450.926
1043	31.12800026	50	3	1044	7.07727	309157.1202	3388450.926
1044	32.11333466	50	3	1045	7.3603201	309207.1203	3388450.926
1045	31.26000023	50	3	1046	6.6218901	309257.1205	3388450.926
1046	32.22000122	50	3	1047	6.6337299	309307.1206	3388450.926
1047	31.43600082	50	3	1048	6.6524701	309357.1207	3388450.926
1048	31.39599991	50	3	1049	6.4082398	309407.1208	3388450.926
1049	30.84000015	50	3	1050	6.2410002	309457.1209	3388450.926
1050	30.82666588	50	3	1051	6.1823802	309507.1211	3388450.926
1051	30.6079998	50	3	1052	6.02806	309557.1212	3388450.926
1052	30.69000053	50	3	1053	6.0414	309607.1213	3388450.926
1053	30.88199997	50	3	1054	6.2715402	309657.1214	3388450.926
1054	30.95499992	50	3	1055	6.3787599	309707.1215	3388450.926
1055	31.01666641	50	3	1056	6.4510999	309757.1216	3388450.926
1056	31.13500023	50	3	1057	6.4616098	309807.1218	3388450.926
1057	31.15749931	50	3	1058	6.49505	309857.1219	3388450.926
1058	31.12000084	50	3	1059	6.5233598	309907.122	3388450.926
1059	31.16600037	50	3	1060	6.5529699	309957.1221	3388450.926
1060	31.21999931	50	3	1061	6.6110501	310007.1222	3388450.926
1061	31.23200035	50	3	1062	6.6557598	310057.1224	3388450.926
1062	31.28000069	50	3	1063	6.66957	310107.1225	3388450.926
1063	31.84799957	50	3	1064	7.28128	310157.1226	3388450.926
1064	32.375	50	3	1065	7.7122202	310207.1227	3388450.926
1065	32.65499878	50	3	1066	8.1239405	310257.1228	3388450.926
1066	32.89799881	50	3	1067	8.2878103	310307.123	3388450.926
1067	32.93999863	50	3	1068	8.2100897	310357.1231	3388450.926
1068	32.7842865	50	3	1069	8.15767	310407.1232	3388450.926
1069	32.79249954	50	3	1070	8.0846796	310457.1233	3388450.926
1070	32.72200012	50	3	1071	8.0641499	310507.1234	3388450.926
1071	32.61000061	50	3	1072	8.06458	310557.1235	3388450.926
1072	32.60333252	50	3	1073	8.0412102	310607.1237	3388450.926
1073	32.59799957	50	3	1074	8.0522099	310657.1238	3388450.926
1074	32.90499878	50	3	1075	8.1456299	310707.1239	3388450.926
1075	32.80796432	50	3	1076	8.0614996	310757.124	3388450.926
1076	32.56750107	50	3	1077	7.9717202	310807.1241	3388450.926
1077	32.65000153	50	3	1078	8.0164099	310857.1243	3388450.926
1078	32.70043945	50	3	1079	8.0588703	310907.1244	3388450.926
1079	32.69200134	50	3	1080	8.1222801	310957.1245	3388450.926
1080	32.625	50	3	1081	8.0673599	311007.1246	3388450.926
1081	32.56999969	50	3	1082	8.0193701	311057.1247	3388450.926
1082	32.67750168	50	3	1083	7.8927798	311107.1249	3388450.926
1083	32.5	50	3	1084	7.7758899	311157.125	3388450.926
1084	32.33499908	50	3	1085	7.68083	311207.1251	3388450.926
1085	32.28333282	50	3	1086	7.6852498	311257.1252	3388450.926
1086	32.34500122	50	3	1087	8.0983896	311307.1253	3388450.926
1087	33.08000183	50	3	1088	8.2946596	311357.1254	3388450.926
1088	32.65200043	50	3	1089	7.9278402	311407.1256	3388450.926
1089	32.84500122	50	3	1090	7.4672899	311457.1257	3388450.926
1090	31.55249977	50	3	1091	5.78439	308007.1175	3388400.938
1091	32.16333389	50	3	1092	6.80551	308057.1176	3388400.938
1092	31.94799995	50	3	1093	7.26999	308107.1177	3388400.938
1093	31.33600044	50	3	1094	7.1522298	308157.1178	3388400.938
1094	32.02999878	50	3	1095	7.2734098	308207.118	3388400.938
1095	31.12000084	50	3	1096	6.8508501	308257.1181	3388400.938
1096	31.19249916	50	3	1097	7.3226199	308307.1182	3388400.938
1097	31.92200089	50	3	1098	7.32407	308357.1183	3388400.938
1098	31.79333305	50	3	1099	7.4535799	308407.1184	3388400.938
1099	31.40999985	50	3	1100	6.9759598	308457.1186	3388400.938
1100	31.375	50	3	1101	6.9686999	308507.1187	3388400.938
1101	31.65399933	50	3	1102	7.1996398	308557.1188	3388400.938
1102	31.32600021	50	3	1103	7.12075	308607.1189	3388400.938
1103	31.77000046	50	3	1104	7.1821299	308657.119	3388400.938
1104	31.66833305	50	3	1105	7.3015399	308707.1192	3388400.938
1105	31.46500015	50	3	1106	7.3892899	308757.1193	3388400.938
1106	31.85000038	50	3	1107	7.3010001	308807.1194	3388400.938
1107	31.69249916	50	3	1108	6.7427402	308857.1195	3388400.938
1108	31.04000092	50	3	1109	6.4451199	308907.1196	3388400.938
1109	30.9659996	50	3	1110	6.40906	308957.1197	3388400.938
1110	30.90833282	50	3	1111	6.9174399	309007.1199	3388400.938
1111	31.62000084	50	3	1112	7.2848902	309057.12	3388400.938
1112	31.6079998	50	3	1113	6.4488602	309107.1201	3388400.938
1113	31.75333405	50	3	1114	6.4472299	309157.1202	3388400.938
1114	31.62750053	50	3	1115	7.3748798	309207.1203	3388400.938
1115	31.66749954	50	3	1116	6.9983201	309257.1205	3388400.938
1116	31.44000053	50	3	1117	6.9380698	309307.1206	3388400.938
1117	31.02000046	50	3	1118	6.6261802	309357.1207	3388400.938
1118	31.32749939	50	3	1119	6.6157899	309407.1208	3388400.938
1119	31.13750076	50	3	1120	6.3283601	309457.1209	3388400.938
1120	31.17833328	50	3	1121	6.2719402	309507.1211	3388400.938
1121	30.7266674	50	3	1122	6.1716499	309557.1212	3388400.938
1122	30.75600052	50	3	1123	6.0615001	309607.1213	3388400.938
1123	30.69750023	50	3	1124	6.1542101	309657.1214	3388400.938
1124	31.30500031	50	3	1125	6.36726	309707.1215	3388400.938
1125	31.10199928	50	3	1126	6.4991002	309757.1216	3388400.938
1126	31.14333344	50	3	1127	6.4977398	309807.1218	3388400.938
1127	31.17333412	50	3	1128	6.4894099	309857.1219	3388400.938
1128	31.17250061	50	3	1129	6.5106001	309907.122	3388400.938
1129	31.27000046	50	3	1130	6.5472398	309957.1221	3388400.938
1130	31.29999924	50	3	1131	6.6048102	310007.1222	3388400.938
1131	31.23500061	50	3	1132	6.61619	310057.1224	3388400.938
1132	31.47999954	50	3	1133	6.7137098	310107.1225	3388400.938
1133	32.40999985	50	3	1134	7.26931	310157.1226	3388400.938
1134	32.34249878	50	3	1135	7.7287598	310207.1227	3388400.938
1135	32.89444733	50	3	1136	8.1857004	310257.1228	3388400.938
1136	32.92499924	50	3	1137	8.3121204	310307.123	3388400.938
1137	32.80500031	50	3	1138	8.2805796	310357.1231	3388400.938
1138	32.72833252	50	3	1139	8.1417398	310407.1232	3388400.938
1139	32.84199905	50	3	1140	8.0766401	310457.1233	3388400.938
1140	32.62200165	50	3	1141	8.0260897	310507.1234	3388400.938
1141	32.62749863	50	3	1142	8.0595303	310557.1235	3388400.938
1142	32.94800186	50	3	1143	8.0820704	310607.1237	3388400.938
1143	32.63000107	50	3	1144	8.0099096	310657.1238	3388400.938
1144	32.56000137	50	3	1145	8.1735201	310707.1239	3388400.938
1145	32.57666779	50	3	1146	8.0335398	310757.124	3388400.938
1146	32.62400055	50	3	1147	7.9690199	310807.1241	3388400.938
1147	32.55749893	50	3	1148	7.9992299	310857.1243	3388400.938
1148	32.65000153	50	3	1149	8.0086002	310907.1244	3388400.938
1149	32.66999817	50	3	1150	8.0431099	310957.1245	3388400.938
1150	32.60499954	50	3	1151	8.0248299	311007.1246	3388400.938
1151	32.72000122	50	3	1152	7.9941301	311057.1247	3388400.938
1152	32.45000076	50	3	1153	7.8860798	311107.1249	3388400.938
1153	32.35666656	50	3	1154	7.84659	311157.125	3388400.938
1154	32.29333496	50	3	1155	7.6715298	311207.1251	3388400.938
1155	32.40999985	50	3	1156	7.69561	311257.1252	3388400.938
1156	32.45999908	50	3	1157	7.8555498	311307.1253	3388400.938
1157	32.96250153	50	3	1158	8.3156996	311357.1254	3388400.938
1158	32.77000046	50	3	1159	8.2033396	311407.1256	3388400.938
1159	31.38999939	50	3	1160	7.25736	308007.1175	3388350.951
1160	31.87750053	50	3	1161	7.1581998	308057.1176	3388350.951
1161	31.40500069	50	3	1162	7.1445498	308107.1177	3388350.951
1162	31.68000031	50	3	1163	7.0620899	308157.1178	3388350.951
1163	31.04800034	50	3	1164	7.1668	308207.118	3388350.951
1164	32.00400162	50	3	1165	7.0819201	308257.1181	3388350.951
1165	31.86199951	50	3	1166	7.0474	308307.1182	3388350.951
1166	31.82500076	50	3	1167	7.17837	308357.1183	3388350.951
1167	31.31999969	50	3	1168	7.04108	308407.1184	3388350.951
1168	30.74500084	50	3	1169	6.8910599	308457.1186	3388350.951
1169	31.35000038	50	3	1170	6.7669702	308507.1187	3388350.951
1170	31.55200005	50	3	1171	6.9556799	308557.1188	3388350.951
1171	31.50749969	50	3	1172	6.79599	308607.1189	3388350.951
1172	31.48600006	50	3	1173	7.1961298	308657.119	3388350.951
1173	31.87400055	50	3	1174	7.2425799	308707.1192	3388350.951
1174	31.56599998	50	3	1175	6.9541602	308757.1193	3388350.951
1175	31.53666687	50	3	1176	7.4201999	308807.1194	3388350.951
1176	32.11000061	50	3	1177	7.3612399	308857.1195	3388350.951
1177	32.26666641	50	3	1178	6.99156	308907.1196	3388350.951
1178	30.91857147	50	3	1179	6.3873	308957.1197	3388350.951
1179	30.78000069	50	3	1180	6.2656698	309007.1199	3388350.951
1180	30.57904434	50	3	1181	6.49192	309057.12	3388350.951
1181	31.48800087	50	3	1182	7.2677002	309107.1201	3388350.951
1182	30.94599915	50	3	1183	6.4380002	309157.1202	3388350.951
1183	31.73500061	50	3	1184	6.7488799	309207.1203	3388350.951
1184	31.50833321	50	3	1185	7.2733898	309257.1205	3388350.951
1185	31.15250015	50	3	1186	6.57201	309307.1206	3388350.951
1186	32.52000046	50	3	1187	6.6192799	309357.1207	3388350.951
1187	31.29249954	50	3	1188	6.6076899	309407.1208	3388350.951
1188	31.84666634	50	3	1189	6.5595598	309457.1209	3388350.951
1189	30.6060009	50	3	1190	6.1378102	309507.1211	3388350.951
1190	30.63999939	50	3	1191	6.0573201	309557.1212	3388350.951
1191	30.61249924	50	3	1192	6.0296698	309607.1213	3388350.951
1192	30.59499931	50	3	1193	6.0426002	309657.1214	3388350.951
1193	30.6566658	50	3	1194	6.2150602	309707.1215	3388350.951
1194	30.97750092	50	3	1195	6.3643699	309757.1216	3388350.951
1195	30.96750069	50	3	1196	6.4377398	309807.1218	3388350.951
1196	31.03249931	50	3	1197	6.4977698	309857.1219	3388350.951
1197	31.10499954	50	3	1198	6.5030298	309907.122	3388350.951
1198	31.13999939	50	3	1199	6.4987402	309957.1221	3388350.951
1199	31.12249947	50	3	1200	6.5468202	310007.1222	3388350.951
1200	31.17000008	50	3	1201	6.5746598	310057.1224	3388350.951
1201	31.47800064	50	3	1202	6.8014002	310107.1225	3388350.951
1202	32.13446808	50	3	1203	7.4685102	310157.1226	3388350.951
1203	32.5	50	3	1204	7.8334899	310207.1227	3388350.951
1204	32.61600113	50	3	1205	8.1025295	310257.1228	3388350.951
1205	32.86000061	50	3	1206	8.3197803	310307.123	3388350.951
1206	32.79499817	50	3	1207	8.2720203	310357.1231	3388350.951
1207	32.90333176	50	3	1208	8.1690998	310407.1232	3388350.951
1208	32.55749893	50	3	1209	8.0736599	310457.1233	3388350.951
1209	32.63999939	50	3	1210	7.9902802	310507.1234	3388350.951
1210	32.57500076	50	3	1211	7.9728699	310557.1235	3388350.951
1211	32.58000183	50	3	1212	8.0012999	310607.1237	3388350.951
1212	32.58200073	50	3	1213	8.0026197	310657.1238	3388350.951
1213	32.63499832	50	3	1214	7.93929	310707.1239	3388350.951
1214	32.75	50	3	1215	7.9626999	310757.124	3388350.951
1215	32.53333282	50	3	1216	7.97615	310807.1241	3388350.951
1216	32.49599838	50	3	1217	7.9903202	310857.1243	3388350.951
1217	32.55199814	50	3	1218	7.99121	310907.1244	3388350.951
1218	32.58000183	50	3	1219	7.9773402	310957.1245	3388350.951
1219	32.58000183	50	3	1220	7.97856	311007.1246	3388350.951
1220	32.55341339	50	3	1221	7.9998002	311057.1247	3388350.951
1221	32.51666641	50	3	1222	7.9160199	311107.1249	3388350.951
1222	32.36000061	50	3	1223	7.7821898	311157.125	3388350.951
1223	32.29000092	50	3	1224	7.67097	311207.1251	3388350.951
1224	32.20800018	50	3	1225	7.6568699	311257.1252	3388350.951
1225	32.55400085	50	3	1226	7.7747502	311307.1253	3388350.951
1226	32.65000153	50	3	1227	8.0064697	311357.1254	3388350.951
1227	32.375	50	3	1228	7.91644	311407.1256	3388350.951
1228	31.32600021	50	3	1229	6.83676	308007.1175	3388300.963
1229	31.46999931	50	3	1230	6.9464798	308057.1176	3388300.963
1230	31.50333405	50	3	1231	6.9362502	308107.1177	3388300.963
1231	31.91749954	50	3	1232	7.2026601	308157.1178	3388300.963
1232	30.89999962	50	3	1233	6.3887401	308207.118	3388300.963
1233	31.58600044	50	3	1234	7.0918198	308257.1181	3388300.963
1234	31.6566658	50	3	1235	7.0267901	308307.1182	3388300.963
1235	31.51000023	50	3	1236	7.0107002	308357.1183	3388300.963
1236	31.19249916	50	3	1237	6.7681198	308407.1184	3388300.963
1237	30.65749931	50	3	1238	6.2532601	308457.1186	3388300.963
1238	31.29199982	50	3	1239	6.6171398	308507.1187	3388300.963
1239	30.95999908	50	3	1240	6.71031	308557.1188	3388300.963
1240	31.48333359	50	3	1241	6.9207902	308607.1189	3388300.963
1241	31.45249939	50	3	1242	6.9380698	308657.119	3388300.963
1242	31.69000053	50	3	1243	7.2277799	308707.1192	3388300.963
1243	31.83749962	50	3	1244	7.2234502	308757.1193	3388300.963
1244	31.48250008	50	3	1245	7.2108002	308807.1194	3388300.963
1245	32.06800079	50	3	1246	7.27104	308857.1195	3388300.963
1246	31.34000015	50	3	1247	7.1286602	308907.1196	3388300.963
1247	31.94499969	50	3	1248	6.6764898	308957.1197	3388300.963
1248	30.76499939	50	3	1249	6.3060002	309007.1199	3388300.963
1249	30.57500076	50	3	1250	6.0272899	309057.12	3388300.963
1250	30.56999969	50	3	1251	6.0858002	309107.1201	3388300.963
1251	31.28750038	50	3	1252	6.8255	309157.1202	3388300.963
1252	31	50	3	1253	6.4669199	309207.1203	3388300.963
1253	31.81999969	50	3	1254	7.27563	309257.1205	3388300.963
1254	32.05599976	50	3	1255	7.2641702	309307.1206	3388300.963
1255	31.25	50	3	1256	6.8267798	309357.1207	3388300.963
1256	31.18499947	50	3	1257	6.60743	309407.1208	3388300.963
1257	31.11333275	50	3	1258	6.5864	309457.1209	3388300.963
1258	30.76000023	50	3	1259	6.1230798	309507.1211	3388300.963
1259	30.60499954	50	3	1260	6.1159601	309557.1212	3388300.963
1260	30.68000031	50	3	1261	6.0177302	309607.1213	3388300.963
1261	30.57749939	50	3	1262	6.0107799	309657.1214	3388300.963
1262	30.61000061	50	3	1263	6.1218901	309707.1215	3388300.963
1263	30.83499908	50	3	1264	6.27563	309757.1216	3388300.963
1264	30.96999931	50	3	1265	6.3875399	309807.1218	3388300.963
1265	31.0625	50	3	1266	6.4867101	309857.1219	3388300.963
1266	31.1016674	50	3	1267	6.4951301	309907.122	3388300.963
1267	31.06333351	50	3	1268	6.4956398	309957.1221	3388300.963
1268	31.10250092	50	3	1269	6.51121	310007.1222	3388300.963
1269	31.08499908	50	3	1270	6.54776	310057.1224	3388300.963
1270	31.71999931	50	3	1271	6.91997	310107.1225	3388300.963
1271	32.40750122	50	3	1272	7.71171	310157.1226	3388300.963
1272	32.56000137	50	3	1273	7.9670901	310207.1227	3388300.963
1273	32.66500092	50	3	1274	8.1286697	310257.1228	3388300.963
1274	32.6566658	50	3	1275	8.1971502	310307.123	3388300.963
1275	32.84999847	50	3	1276	8.1570597	310357.1231	3388300.963
1276	32.61142731	50	3	1277	8.1246004	310407.1232	3388300.963
1277	32.60499954	50	3	1278	8.0870504	310457.1233	3388300.963
1278	32.52999878	50	3	1279	8.0132799	310507.1234	3388300.963
1279	32.47249985	50	3	1280	7.92313	310557.1235	3388300.963
1280	32.4620018	50	3	1281	7.92347	310607.1237	3388300.963
1281	32.52249908	50	3	1282	7.9766202	310657.1238	3388300.963
1282	32.56000137	50	3	1283	7.9596	310707.1239	3388300.963
1283	32.47249985	50	3	1284	7.9591098	310757.124	3388300.963
1284	32.51333237	50	3	1285	7.99368	310807.1241	3388300.963
1285	32.59999847	50	3	1286	7.9937601	310857.1243	3388300.963
1286	32.4980011	50	3	1287	7.9791698	310907.1244	3388300.963
1287	32.55766678	50	3	1288	7.9500799	310957.1245	3388300.963
1288	32.61666489	50	3	1289	7.9401598	311007.1246	3388300.963
1289	32.51645279	50	3	1290	7.92487	311057.1247	3388300.963
1290	32.50833511	50	3	1291	7.8670101	311107.1249	3388300.963
1291	32.26200104	50	3	1292	7.79492	311157.125	3388300.963
1292	32.29600143	50	3	1293	7.6609001	311207.1251	3388300.963
1293	32.00400162	50	3	1294	7.58565	311257.1252	3388300.963
1294	32.28499985	50	3	1295	7.6493602	311307.1253	3388300.963
1295	32.65999985	50	3	1296	7.8470302	311357.1254	3388300.963
1296	32.77799988	50	3	1297	7.7904701	311407.1256	3388300.963
1297	30.87750053	50	3	1298	6.4695301	308007.1175	3388250.975
1298	31.36199951	50	3	1299	6.7885098	308057.1176	3388250.975
1299	31.41749954	50	3	1300	6.8898501	308107.1177	3388250.975
1300	31.55500031	50	3	1301	7.0904598	308157.1178	3388250.975
1301	31.26600075	50	3	1302	6.4528298	308207.118	3388250.975
1302	31.80333328	50	3	1303	7.0836101	308257.1181	3388250.975
1303	31.45199966	50	3	1304	6.9162598	308307.1182	3388250.975
1304	31.05999947	50	3	1305	6.8787699	308357.1183	3388250.975
1305	31.25499916	50	3	1306	6.6030102	308407.1184	3388250.975
1306	30.45750046	50	3	1307	5.9314599	308457.1186	3388250.975
1307	31.23999977	50	3	1308	6.7094402	308507.1187	3388250.975
1308	31.43000031	50	3	1309	6.40411	308557.1188	3388250.975
1309	31.17749977	50	3	1310	6.93645	308607.1189	3388250.975
1310	31.55999947	50	3	1311	6.8790598	308657.119	3388250.975
1311	31.50166702	50	3	1312	7.08214	308707.1192	3388250.975
1312	31.20000076	50	3	1313	7.1493902	308757.1193	3388250.975
1313	31.56599998	50	3	1314	7.0142002	308807.1194	3388250.975
1314	30.95000076	50	3	1315	7.3442101	308857.1195	3388250.975
1315	31.55833244	50	3	1316	6.59196	308907.1196	3388250.975
1316	31.82799911	50	3	1317	7.57476	308957.1197	3388250.975
1317	31.24500084	50	3	1318	6.3733802	309007.1199	3388250.975
1318	30.71856499	50	3	1319	6.1585202	309057.12	3388250.975
1319	30.66200066	50	3	1320	6.0797801	309107.1201	3388250.975
1320	30.84250069	50	3	1321	6.6115699	309157.1202	3388250.975
1321	31.62999916	50	3	1322	6.55758	309207.1203	3388250.975
1322	31.65250015	50	3	1323	6.6438198	309257.1205	3388250.975
1323	31.88599968	50	3	1324	7.10711	309307.1206	3388250.975
1324	31.89599991	50	3	1325	7.0366802	309357.1207	3388250.975
1325	32.11800003	50	3	1326	7.0373502	309407.1208	3388250.975
1326	31.17000008	50	3	1327	6.56673	309457.1209	3388250.975
1327	31.28000069	50	3	1328	6.2736802	309507.1211	3388250.975
1328	30.69499969	50	3	1329	6.07862	309557.1212	3388250.975
1329	30.60333252	50	3	1330	6.05023	309607.1213	3388250.975
1330	30.55999947	50	3	1331	6.0047102	309657.1214	3388250.975
1331	30.61249924	50	3	1332	6.0268202	309707.1215	3388250.975
1332	30.7033329	50	3	1333	6.1936998	309757.1216	3388250.975
1333	30.98189163	50	3	1334	6.3510098	309807.1218	3388250.975
1334	30.93600082	50	3	1335	6.4773202	309857.1219	3388250.975
1335	31.01333427	50	3	1336	6.4802999	309907.122	3388250.975
1336	31.07999992	50	3	1337	6.50667	309957.1221	3388250.975
1337	31.11499977	50	3	1338	6.5015101	310007.1222	3388250.975
1338	31.09799957	50	3	1339	6.53163	310057.1224	3388250.975
1339	31.96589279	50	3	1340	7.2052999	310107.1225	3388250.975
1340	32.65000153	50	3	1341	7.9587102	310157.1226	3388250.975
1341	32.54333496	50	3	1342	8.0341196	310207.1227	3388250.975
1342	32.61333466	50	3	1343	8.0503702	310257.1228	3388250.975
1343	32.63750076	50	3	1344	8.1296597	310307.123	3388250.975
1344	32.625	50	3	1345	8.1024599	310357.1231	3388250.975
1345	32.70750046	50	3	1346	8.0844297	310407.1232	3388250.975
1346	32.61833191	50	3	1347	8.0559101	310457.1233	3388250.975
1347	32.54166794	50	3	1348	7.9643202	310507.1234	3388250.975
1348	32.40250015	50	3	1349	7.9082599	310557.1235	3388250.975
1349	32.45399857	50	3	1350	7.8765998	310607.1237	3388250.975
1350	32.45249939	50	3	1351	7.9317899	310657.1238	3388250.975
1351	32.38666534	50	3	1352	7.8921299	310707.1239	3388250.975
1352	32.47750092	50	3	1353	7.9361	310757.124	3388250.975
1353	32.53666687	50	3	1354	8.0022802	310807.1241	3388250.975
1354	32.47999954	50	3	1355	7.9818001	310857.1243	3388250.975
1355	32.47800064	50	3	1356	7.9835	310907.1244	3388250.975
1356	32.45500183	50	3	1357	7.9295201	310957.1245	3388250.975
1357	32.43500137	50	3	1358	7.9044299	311007.1246	3388250.975
1358	32.39749908	50	3	1359	7.8591299	311057.1247	3388250.975
1359	32.34749985	50	3	1360	7.8096399	311107.1249	3388250.975
1360	32.45333481	50	3	1361	7.7691498	311157.125	3388250.975
1361	32.13999939	50	3	1362	7.6979098	311207.1251	3388250.975
1362	31.99200058	50	3	1363	7.4806099	311257.1252	3388250.975
1363	32.0359993	50	3	1364	7.4717498	311307.1253	3388250.975
1364	31.94000053	50	3	1365	7.46913	311357.1254	3388250.975
1365	32.22000122	50	3	1366	7.5995102	311407.1256	3388250.975
1366	30.95428658	50	3	1367	6.6732402	308057.1176	3388200.987
1367	31.03249931	50	3	1368	6.5950499	308107.1177	3388200.987
1368	31.29166603	50	3	1369	6.8676901	308157.1178	3388200.987
1369	31.18000031	50	3	1370	6.7209501	308207.118	3388200.987
1370	31.35888863	50	3	1371	6.8511801	308257.1181	3388200.987
1371	31.50666618	50	3	1372	6.9484301	308307.1182	3388200.987
1372	30.72500038	50	3	1373	6.5376	308357.1183	3388200.987
1373	31.23999977	50	3	1374	6.6001801	308407.1184	3388200.987
1374	30.47599983	50	3	1375	5.9284	308457.1186	3388200.987
1375	31.11000061	50	3	1376	6.71807	308507.1187	3388200.987
1376	31.19333267	50	3	1377	6.6816101	308557.1188	3388200.987
1377	31.36000061	50	3	1378	6.8938799	308607.1189	3388200.987
1378	31.1566658	50	3	1379	6.8309302	308657.119	3388200.987
1379	31.21624947	50	3	1380	6.9285498	308707.1192	3388200.987
1380	31.10888863	50	3	1381	6.6182499	308757.1193	3388200.987
1381	30.98999977	50	3	1382	6.79036	308807.1194	3388200.987
1382	31.04400063	50	3	1383	6.4674802	308857.1195	3388200.987
1383	32.16166687	50	3	1384	7.4026499	308907.1196	3388200.987
1384	31.60666656	50	3	1385	7.2592301	308957.1197	3388200.987
1385	31.68666649	50	3	1386	7.3243699	309007.1199	3388200.987
1386	30.72624969	50	3	1387	6.2172799	309057.12	3388200.987
1387	30.67499924	50	3	1388	6.11092	309107.1201	3388200.987
1388	30.51000023	50	3	1389	6.0364599	309157.1202	3388200.987
1389	31.7159996	50	3	1390	6.8261499	309207.1203	3388200.987
1390	31.1060009	50	3	1391	6.95506	309257.1205	3388200.987
1391	31.45000076	50	3	1392	7.1458998	309307.1206	3388200.987
1392	31.68625069	50	3	1393	7.1329098	309357.1207	3388200.987
1393	31.17399979	50	3	1394	6.7982898	309407.1208	3388200.987
1394	31.10000038	50	3	1395	6.6286402	309457.1209	3388200.987
1395	31.35333252	50	3	1396	6.7034101	309507.1211	3388200.987
1396	30.63714218	50	3	1397	6.1119199	309557.1212	3388200.987
1397	30.45874977	50	3	1398	6.0695	309607.1213	3388200.987
1398	30.5	50	3	1399	5.9902101	309657.1214	3388200.987
1399	30.40368271	50	3	1400	5.9442801	309707.1215	3388200.987
1400	30.62999916	50	3	1401	6.1870298	309757.1216	3388200.987
1401	30.8220005	50	3	1402	6.3135099	309807.1218	3388200.987
1402	30.95400047	50	3	1403	6.39498	309857.1219	3388200.987
1403	30.94750023	50	3	1404	6.43959	309907.122	3388200.987
1404	31.11249924	50	3	1405	6.5069699	309957.1221	3388200.987
1405	31.04999924	50	3	1406	6.4997101	310007.1222	3388200.987
1406	31.36666679	50	3	1407	6.6942902	310057.1224	3388200.987
1407	31.98399925	50	3	1408	7.4035101	310107.1225	3388200.987
1408	32.36399841	50	3	1409	7.8956099	310157.1226	3388200.987
1409	32.39500046	50	3	1410	7.9844599	310207.1227	3388200.987
1410	32.59500122	50	3	1411	8.0223703	310257.1228	3388200.987
1411	32.65200043	50	3	1412	8.0720396	310307.123	3388200.987
1412	32.54999924	50	3	1413	8.1011801	310357.1231	3388200.987
1413	32.65000153	50	3	1414	8.0473299	310407.1232	3388200.987
1414	32.58333206	50	3	1415	7.9841099	310457.1233	3388200.987
1415	32.42750168	50	3	1416	7.9084201	310507.1234	3388200.987
1416	32.3219986	50	3	1417	7.8859701	310557.1235	3388200.987
1417	32.31499863	50	3	1418	7.8435102	310607.1237	3388200.987
1418	32.34999847	50	3	1419	7.7929201	310657.1238	3388200.987
1419	32.40499878	50	3	1420	7.8192601	310707.1239	3388200.987
1420	32.49333191	50	3	1421	7.9001698	310757.124	3388200.987
1421	32.41666794	50	3	1422	7.9279799	310807.1241	3388200.987
1422	32.56999969	50	3	1423	7.9781299	310857.1243	3388200.987
1423	32.45000076	50	3	1424	7.9338002	310907.1244	3388200.987
1424	32.35250092	50	3	1425	7.8998899	310957.1245	3388200.987
1425	32.29999924	50	3	1426	7.8397598	311007.1246	3388200.987
1426	32.30666733	50	3	1427	7.7954302	311057.1247	3388200.987
1427	32.39500046	50	3	1428	7.8214502	311107.1249	3388200.987
1428	32.29000092	50	3	1429	7.76966	311157.125	3388200.987
1429	31.99250031	50	3	1430	7.5575399	311207.1251	3388200.987
1430	32.00666809	50	3	1431	7.4652801	311257.1252	3388200.987
1431	32.09666824	50	3	1432	7.4054899	311307.1253	3388200.987
1432	31.93400002	50	3	1433	7.4084301	311357.1254	3388200.987
1433	31.75749969	50	3	1434	7.39187	311407.1256	3388200.987
1434	30.70249939	50	3	1435	6.3194499	308057.1176	3388151
1435	30.98125076	50	3	1436	6.4423599	308107.1177	3388151
1436	30.67374992	50	3	1437	6.4485602	308157.1178	3388151
1437	30.78249931	50	3	1438	6.5880799	308207.118	3388151
1438	31.33499908	50	3	1439	6.83919	308257.1181	3388151
1439	31.35124969	50	3	1440	6.89433	308307.1182	3388151
1440	30.62874985	50	3	1441	6.4178801	308357.1183	3388151
1441	31.03249931	50	3	1442	6.6191602	308407.1184	3388151
1442	30.71800041	50	3	1443	5.9826999	308457.1186	3388151
1443	30.76285744	50	3	1444	6.3291101	308507.1187	3388151
1444	31.23999977	50	3	1445	6.7026901	308557.1188	3388151
1445	31.27625084	50	3	1446	6.5184398	308607.1189	3388151
1446	30.51285744	50	3	1447	6.5137701	308657.119	3388151
1447	31.01874924	50	3	1448	6.6024599	308707.1192	3388151
1448	31.55875015	50	3	1449	6.5907202	308757.1193	3388151
1449	30.93000031	50	3	1450	6.4176302	308807.1194	3388151
1450	31.50124931	50	3	1451	6.8457098	308857.1195	3388151
1451	31.44000053	50	3	1452	7.16291	308907.1196	3388151
1452	31.53375053	50	3	1453	7.0221801	308957.1197	3388151
1453	31.97624969	50	3	1454	7.47752	309007.1199	3388151
1454	31.49374962	50	3	1455	6.5928898	309057.12	3388151
1455	30.60833359	50	3	1456	6.1875901	309107.1201	3388151
1456	30.57500076	50	3	1457	6.0261698	309157.1202	3388151
1457	30.59166718	50	3	1458	6.8301601	309207.1203	3388151
1458	31.12999916	50	3	1459	6.8308301	309257.1205	3388151
1459	31.60750008	50	3	1460	7.0271201	309307.1206	3388151
1460	31.31666756	50	3	1461	6.7543101	309357.1207	3388151
1461	31.19000053	50	3	1462	6.72156	309407.1208	3388151
1462	32.05333328	50	3	1463	6.6989698	309457.1209	3388151
1463	31.07166672	50	3	1464	6.6557498	309507.1211	3388151
1464	30.64714241	50	3	1465	6.1464801	309557.1212	3388151
1465	30.50857162	50	3	1466	6.0101399	309607.1213	3388151
1466	30.46857071	50	3	1467	5.95298	309657.1214	3388151
1467	30.4260006	50	3	1468	5.9537001	309707.1215	3388151
1468	30.57125092	50	3	1469	6.0462999	309757.1216	3388151
1469	30.59714317	50	3	1470	6.2151999	309807.1218	3388151
1470	30.83285713	50	3	1471	6.3123899	309857.1219	3388151
1471	30.91374969	50	3	1472	6.37887	309907.122	3388151
1472	30.86333275	50	3	1473	6.4370098	309957.1221	3388151
1473	31.11000061	50	3	1474	6.42699	310007.1222	3388151
1474	31.48333359	50	3	1475	6.8991599	310057.1224	3388151
1475	32.2159996	50	3	1476	7.54175	310107.1225	3388151
1476	32.35571289	50	3	1477	7.8192401	310157.1226	3388151
1477	32.29999924	50	3	1478	7.8232298	310207.1227	3388151
1478	32.41714096	50	3	1479	7.8483801	310257.1228	3388151
1479	32.47600174	50	3	1480	7.9776502	310307.123	3388151
1480	32.56666565	50	3	1481	7.9906998	310357.1231	3388151
1481	32.43999863	50	3	1482	7.9555402	310407.1232	3388151
1482	32.34000015	50	3	1483	7.8933702	310457.1233	3388151
1483	32.04999924	50	3	1484	7.7806501	310507.1234	3388151
1484	32.16875076	50	3	1485	7.76123	310557.1235	3388151
1485	32.16999817	50	3	1486	7.7129102	310607.1237	3388151
1486	32.26124954	50	3	1487	7.7371202	310657.1238	3388151
1487	32.37200165	50	3	1488	7.8201699	310707.1239	3388151
1488	32.43857193	50	3	1489	7.8783898	310757.124	3388151
1489	32.52899933	50	3	1490	7.95818	310807.1241	3388151
1490	32.54249954	50	3	1491	7.9774899	310857.1243	3388151
1491	32.65000153	50	3	1492	7.9707398	310907.1244	3388151
1492	32.3144455	50	3	1493	7.8383799	310957.1245	3388151
1493	32.30166626	50	3	1494	7.7545199	311007.1246	3388151
1494	32.12200165	50	3	1495	7.7575998	311057.1247	3388151
1495	31.88500023	50	3	1496	7.5978799	311107.1249	3388151
1496	32.04142761	50	3	1497	7.7617202	311157.125	3388151
1497	32.18428421	50	3	1498	7.8964901	311207.1251	3388151
1498	32.0633316	50	3	1499	7.4695401	311257.1252	3388151
1499	31.95833397	50	3	1500	7.4467301	311307.1253	3388151
1500	32.02142715	50	3	1501	7.4921598	311357.1254	3388151
1501	31.02777863	50	3	1502	6.4098701	308107.1177	3388101.012
1502	30.49749947	50	3	1503	6.0798202	308157.1178	3388101.012
1503	30.77555466	50	3	1504	6.2783499	308207.118	3388101.012
1504	31.28874969	50	3	1505	6.8117499	308257.1181	3388101.012
1505	31.23875046	50	3	1506	6.8586102	308307.1182	3388101.012
1506	30.47249985	50	3	1507	6.19554	308357.1183	3388101.012
1507	30.37750053	50	3	1508	6.4017301	308407.1184	3388101.012
1508	30.99124908	50	3	1509	6.4832902	308457.1186	3388101.012
1509	30.82875061	50	3	1510	6.2774501	308507.1187	3388101.012
1510	30.86000061	50	3	1511	6.6760802	308557.1188	3388101.012
1511	30.54624939	50	3	1512	6.3962798	308607.1189	3388101.012
1512	30.51142883	50	3	1513	6.0187302	308657.119	3388101.012
1513	31.01625061	50	3	1514	6.4804702	308707.1192	3388101.012
1514	30.95000076	50	3	1515	6.51266	308757.1193	3388101.012
1515	31.51375008	50	3	1516	6.4247799	308807.1194	3388101.012
1516	31.47999954	50	3	1517	7.0114498	308857.1195	3388101.012
1517	31.76888847	50	3	1518	6.9983702	308907.1196	3388101.012
1518	31.91799927	50	3	1519	7.1774001	308957.1197	3388101.012
1519	31.82888794	50	3	1520	7.1265702	309007.1199	3388101.012
1520	32.11299896	50	3	1521	7.3097501	309057.12	3388101.012
1521	30.49500084	50	3	1522	6.1160002	309107.1201	3388101.012
1522	31.70999908	50	3	1523	6.0922699	309157.1202	3388101.012
1523	30.52375031	50	3	1524	6.0278502	309207.1203	3388101.012
1524	31.21999931	50	3	1525	6.6359901	309257.1205	3388101.012
1525	31.75124931	50	3	1526	7.05265	309307.1206	3388101.012
1526	31.81749916	50	3	1527	7.1782498	309357.1207	3388101.012
1527	31.87000084	50	3	1528	6.8882599	309407.1208	3388101.012
1528	31.07428551	50	3	1529	6.69558	309457.1209	3388101.012
1529	31.29750061	50	3	1530	6.63624	309507.1211	3388101.012
1530	30.82999992	50	3	1531	6.25776	309557.1212	3388101.012
1531	30.54999924	50	3	1532	6.0294399	309607.1213	3388101.012
1532	30.4683342	50	3	1533	5.9629402	309657.1214	3388101.012
1533	30.52000046	50	3	1534	5.9320898	309707.1215	3388101.012
1534	30.53142929	50	3	1535	5.9811101	309757.1216	3388101.012
1535	30.58571434	50	3	1536	6.1789398	309807.1218	3388101.012
1536	30.78800011	50	3	1537	6.26441	309857.1219	3388101.012
1537	30.83374977	50	3	1538	6.3223801	309907.122	3388101.012
1538	30.8516674	50	3	1539	6.3891602	309957.1221	3388101.012
1539	31.03666687	50	3	1540	6.4148202	310007.1222	3388101.012
1540	31.90285683	50	3	1541	7.12679	310057.1224	3388101.012
1541	32.20142746	50	3	1542	7.6250901	310107.1225	3388101.012
1542	32.31000137	50	3	1543	7.7667799	310157.1226	3388101.012
1543	32.31000137	50	3	1544	7.7959499	310207.1227	3388101.012
1544	32.29999924	50	3	1545	7.8913298	310257.1228	3388101.012
1545	32.36000061	50	3	1546	7.90345	310307.123	3388101.012
1546	32.36666489	50	3	1547	7.86408	310357.1231	3388101.012
1547	32.34000015	50	3	1548	7.81493	310407.1232	3388101.012
1548	32.33800125	50	3	1549	7.74647	310457.1233	3388101.012
1549	32.14333344	50	3	1550	7.6686502	310507.1234	3388101.012
1550	32.09999847	50	3	1551	7.6213102	310557.1235	3388101.012
1551	31.99428558	50	3	1552	7.5602798	310607.1237	3388101.012
1552	32.17499924	50	3	1553	7.6603899	310657.1238	3388101.012
1553	32.27999878	50	3	1554	7.7719898	310707.1239	3388101.012
1554	32.53749847	50	3	1555	7.91257	310757.124	3388101.012
1555	32.52799988	50	3	1556	7.9907198	310807.1241	3388101.012
1556	32.52000046	50	3	1557	8.0014801	310857.1243	3388101.012
1557	32.4271431	50	3	1558	7.9548402	310907.1244	3388101.012
1558	32.30125046	50	3	1559	7.8023901	310957.1245	3388101.012
1559	32.05625153	50	3	1560	7.6805501	311007.1246	3388101.012
1560	32.02999878	50	3	1561	7.5357099	311057.1247	3388101.012
1561	31.63571358	50	3	1562	7.4024601	311107.1249	3388101.012
1562	31.60499954	50	3	1563	7.4428301	311157.125	3388101.012
1563	25.12333298	50	3	1564	2.60268	308107.1177	3388051.024
1564	30.02142906	50	3	1565	4.1641302	308157.1178	3388051.024
1565	25.96750069	50	3	1566	5.5342698	308207.118	3388051.024
1566	30.11666679	50	3	1567	6.4499998	308257.1181	3388051.024
1567	30.91374969	50	3	1568	6.7256598	308307.1182	3388051.024
1568	30.78833389	50	3	1569	6.08111	308357.1183	3388051.024
1569	30.60700035	50	3	1570	6.0950999	308407.1184	3388051.024
1570	30.68000031	50	3	1571	6.3765898	308457.1186	3388051.024
1571	31.14500046	50	3	1572	6.53789	308507.1187	3388051.024
1572	30.78125	50	3	1573	6.3472099	308557.1188	3388051.024
1573	30.53499985	50	3	1574	6.1104598	308607.1189	3388051.024
1574	30.50714302	50	3	1575	6.1263299	308657.119	3388051.024
1575	31.10625076	50	3	1576	6.5377798	308707.1192	3388051.024
1576	31.07250023	50	3	1577	6.4640899	308757.1193	3388051.024
1577	31.43714333	50	3	1578	7.10639	308807.1194	3388051.024
1578	31.61624908	50	3	1579	6.8656101	308857.1195	3388051.024
1579	31.67000008	50	3	1580	7.2943101	308907.1196	3388051.024
1580	31.29750061	50	3	1581	7.0397701	308957.1197	3388051.024
1581	31.61499977	50	3	1582	7.0902901	309007.1199	3388051.024
1582	31.83749962	50	3	1583	7.5373201	309057.12	3388051.024
1583	31.63125038	50	3	1584	6.9216499	309107.1201	3388051.024
1584	30.5342865	50	3	1585	6.0774698	309157.1202	3388051.024
1585	30.5466671	50	3	1586	6.0065498	309207.1203	3388051.024
1586	31.22200012	50	3	1587	6.6950202	309257.1205	3388051.024
1587	31.06428528	50	3	1588	6.9456801	309307.1206	3388051.024
1588	31.85000038	50	3	1589	7.29	309357.1207	3388051.024
1589	32.01777649	50	3	1590	7.1423898	309407.1208	3388051.024
1590	31.05897713	50	3	1591	6.5749202	309457.1209	3388051.024
1591	31.1511116	50	3	1592	6.7016501	309507.1211	3388051.024
1592	30.93799973	50	3	1593	6.6142302	309557.1212	3388051.024
1593	30.45888901	50	3	1594	6.02596	309607.1213	3388051.024
1594	30.55833244	50	3	1595	5.9823499	309657.1214	3388051.024
1595	30.51571465	50	3	1596	5.94835	309707.1215	3388051.024
1596	30.45750046	50	3	1597	5.9662399	309757.1216	3388051.024
1597	30.46999931	50	3	1598	6.0515399	309807.1218	3388051.024
1598	30.76399994	50	3	1599	6.2024298	309857.1219	3388051.024
1599	30.8983326	50	3	1600	6.2816701	309907.122	3388051.024
1600	30.84749985	50	3	1601	6.36341	309957.1221	3388051.024
1601	30.83124924	50	3	1602	6.3972502	310007.1222	3388051.024
1602	31.91666603	50	3	1603	7.2543602	310057.1224	3388051.024
1603	31.93857193	50	3	1604	7.5771399	310107.1225	3388051.024
1604	32.10666656	50	3	1605	7.6268301	310157.1226	3388051.024
1605	32.0933342	50	3	1606	7.7104301	310207.1227	3388051.024
1606	32.23500061	50	3	1607	7.78197	310257.1228	3388051.024
1607	32.25500107	50	3	1608	7.85361	310307.123	3388051.024
1608	32.20000076	50	3	1609	7.75489	310357.1231	3388051.024
1609	32.23166656	50	3	1610	7.7183199	310407.1232	3388051.024
1610	32.09428406	50	3	1611	7.69941	310457.1233	3388051.024
1611	32.04166794	50	3	1612	7.6251898	310507.1234	3388051.024
1612	31.96999931	50	3	1613	7.5580001	310557.1235	3388051.024
1613	31.78142929	50	3	1614	7.39785	310607.1237	3388051.024
1614	31.82857132	50	3	1615	7.4326501	310657.1238	3388051.024
1615	31.89500046	50	3	1616	7.6584101	310707.1239	3388051.024
1616	32.00666809	50	3	1617	7.8690701	310757.124	3388051.024
1617	32.12333298	50	3	1618	8.0107498	310807.1241	3388051.024
1618	32.22000122	50	3	1619	7.9155002	310857.1243	3388051.024
1619	32.09500122	50	3	1620	7.8204398	310907.1244	3388051.024
1620	32.28374863	50	3	1621	7.8461199	310957.1245	3388051.024
1621	32.15000153	50	3	1622	7.5736899	311007.1246	3388051.024
1622	31.63428497	50	3	1623	7.2828398	311057.1247	3388051.024
1623	31.06999969	50	3	1624	6.90798	311107.1249	3388051.024
1624	29.6566658	50	3	1625	1.53148	308157.1178	3388001.037
1625	25.44799995	50	3	1626	5.3780599	308207.118	3388001.037
1626	30.74875069	50	3	1627	5.4245901	308257.1181	3388001.037
1627	27.79125023	50	3	1628	5.2442002	308307.1182	3388001.037
1628	30.33124924	50	3	1629	5.6810398	308357.1183	3388001.037
1629	30.26749992	50	3	1630	6.0029702	308407.1184	3388001.037
1630	30.49500084	50	3	1631	6.1258602	308457.1186	3388001.037
1631	30.71857071	50	3	1632	6.39046	308507.1187	3388001.037
1632	30.67666626	50	3	1633	6.2806001	308557.1188	3388001.037
1633	30.44499969	50	3	1634	6.0745802	308607.1189	3388001.037
1634	31.12833405	50	3	1635	6.6456099	308657.119	3388001.037
1635	30.48250008	50	3	1636	6.4285798	308707.1192	3388001.037
1636	30.99200058	50	3	1637	6.5127301	308757.1193	3388001.037
1637	31.39749908	50	3	1638	6.8722801	308807.1194	3388001.037
1638	31.08499908	50	3	1639	6.76197	308857.1195	3388001.037
1639	30.82500076	50	3	1640	6.8916202	308907.1196	3388001.037
1640	31.30875015	50	3	1641	6.6412301	308957.1197	3388001.037
1641	31.44833374	50	3	1642	7.1991301	309007.1199	3388001.037
1642	31.61000061	50	3	1643	7.2140098	309057.12	3388001.037
1643	31.96125031	50	3	1644	7.2911201	309107.1201	3388001.037
1644	30.43375015	50	3	1645	6.0622201	309157.1202	3388001.037
1645	30.42571449	50	3	1646	6.0379801	309207.1203	3388001.037
1646	31.19874954	50	3	1647	6.6319699	309257.1205	3388001.037
1647	30.8433342	50	3	1648	6.4057498	309307.1206	3388001.037
1648	31.69571495	50	3	1649	7.2698898	309357.1207	3388001.037
1649	31.89999962	50	3	1650	7.2480001	309407.1208	3388001.037
1650	31.18499947	50	3	1651	6.6739302	309457.1209	3388001.037
1651	31.20599937	50	3	1652	6.6975498	309507.1211	3388001.037
1652	31.12857056	50	3	1653	6.59659	309557.1212	3388001.037
1653	30.47500038	50	3	1654	6.0513301	309607.1213	3388001.037
1654	30.45499992	50	3	1655	5.9868102	309657.1214	3388001.037
1655	30.62249947	50	3	1656	5.9899502	309707.1215	3388001.037
1656	30.51600075	50	3	1657	5.97259	309757.1216	3388001.037
1657	30.5	50	3	1658	6.0253401	309807.1218	3388001.037
1658	30.67000008	50	3	1659	6.20542	309857.1219	3388001.037
1659	30.74500084	50	3	1660	6.2975402	309907.122	3388001.037
1660	30.80999947	50	3	1661	6.3464499	309957.1221	3388001.037
1661	31.59499931	50	3	1662	6.6051502	310007.1222	3388001.037
1662	31.78333282	50	3	1663	7.30516	310057.1224	3388001.037
1663	31.94499969	50	3	1664	7.4851599	310107.1225	3388001.037
1664	31.97400093	50	3	1665	7.5117998	310157.1226	3388001.037
1665	32.01499939	50	3	1666	7.5873199	310207.1227	3388001.037
1666	31.95833397	50	3	1667	7.6784101	310257.1228	3388001.037
1667	32.09222412	50	3	1668	7.7174902	310307.123	3388001.037
1668	32.07500076	50	3	1669	7.72369	310357.1231	3388001.037
1669	32.05400085	50	3	1670	7.6326699	310407.1232	3388001.037
1670	31.9985714	50	3	1671	7.5746799	310457.1233	3388001.037
1671	31.87999916	50	3	1672	7.5060601	310507.1234	3388001.037
1672	31.88199997	50	3	1673	7.4077101	310557.1235	3388001.037
1673	31.74875069	50	3	1674	7.2950902	310607.1237	3388001.037
1674	31.60499954	50	3	1675	7.1932602	310657.1238	3388001.037
1675	31.46857071	50	3	1676	7.0971498	310707.1239	3388001.037
1676	31.26571465	50	3	1677	6.9383001	310757.124	3388001.037
1677	31.11833382	50	3	1678	6.9043798	310807.1241	3388001.037
1678	30.65749931	50	3	1679	7.0504599	310857.1243	3388001.037
1679	31.26499939	50	3	1680	7.2466402	310907.1244	3388001.037
1680	31.34833336	50	3	1681	7.2028899	310957.1245	3388001.037
1681	31.22249985	50	3	1682	7.1490998	311007.1246	3388001.037
1682	23.71999931	50	3	1683	1.88877	308157.1178	3387951.049
1683	29.33600044	50	3	1684	3.4086699	308207.118	3387951.049
1684	30.55750084	50	3	1685	5.9732499	308257.1181	3387951.049
1685	30.86249924	50	3	1686	6.1730599	308307.1182	3387951.049
1686	30.71500015	50	3	1687	5.6353102	308357.1183	3387951.049
1687	29.64500046	50	3	1688	5.7353501	308407.1184	3387951.049
1688	30.58499908	50	3	1689	5.7918301	308457.1186	3387951.049
1689	30.21750069	50	3	1690	5.95927	308507.1187	3387951.049
1690	30.20999908	50	3	1691	6.1549201	308557.1188	3387951.049
1691	30.2859993	50	3	1692	5.9999199	308607.1189	3387951.049
1692	30.37999916	50	3	1693	6.0113702	308657.119	3387951.049
1693	30.875	50	3	1694	6.1308799	308707.1192	3387951.049
1694	30.62599945	50	3	1695	6.42978	308757.1193	3387951.049
1695	31.01399994	50	3	1696	6.7544699	308807.1194	3387951.049
1696	31.15333366	50	3	1697	6.7622099	308857.1195	3387951.049
1697	30.44000053	50	3	1698	6.15449	308907.1196	3387951.049
1698	30.95000076	50	3	1699	6.6344299	308957.1197	3387951.049
1699	31.25600052	50	3	1700	6.8372698	309007.1199	3387951.049
1700	31.81749916	50	3	1701	7.19907	309057.12	3387951.049
1701	31.52000046	50	3	1702	7.4008999	309107.1201	3387951.049
1702	31.06999969	50	3	1703	6.3331099	309157.1202	3387951.049
1703	30.37249947	50	3	1704	6.0468898	309207.1203	3387951.049
1704	31.11800003	50	3	1705	6.6901302	309257.1205	3387951.049
1705	30.86000061	50	3	1706	6.39851	309307.1206	3387951.049
1706	31.75399971	50	3	1707	7.2673898	309357.1207	3387951.049
1707	32.0625	50	3	1708	7.4187899	309407.1208	3387951.049
1708	31.13999939	50	3	1709	6.67944	309457.1209	3387951.049
1709	31.16500092	50	3	1710	6.6970801	309507.1211	3387951.049
1710	31.13333321	50	3	1711	6.6905198	309557.1212	3387951.049
1711	30.42616081	50	3	1712	6.0825701	309607.1213	3387951.049
1712	30.45199966	50	3	1713	5.99897	309657.1214	3387951.049
1713	30.375	50	3	1714	5.9721699	309707.1215	3387951.049
1714	30.44857216	50	3	1715	5.9913402	309757.1216	3387951.049
1715	30.46500015	50	3	1716	6.0201802	309807.1218	3387951.049
1716	30.66285706	50	3	1717	6.17732	309857.1219	3387951.049
1717	30.76857185	50	3	1718	6.29316	309907.122	3387951.049
1718	30.98999977	50	3	1719	6.3443999	309957.1221	3387951.049
1719	32.27666855	50	3	1720	7.4436202	310007.1222	3387951.049
1720	32.25500107	50	3	1721	7.5948901	310057.1224	3387951.049
1721	31.84000015	50	3	1722	7.4362998	310107.1225	3387951.049
1722	31.91749954	50	3	1723	7.4499402	310157.1226	3387951.049
1723	32.02666855	50	3	1724	7.4869299	310207.1227	3387951.049
1724	31.95400047	50	3	1725	7.5056701	310257.1228	3387951.049
1725	32.02500153	50	3	1726	7.5803099	310307.123	3387951.049
1726	32.04000092	50	3	1727	7.6052899	310357.1231	3387951.049
1727	32.27000046	50	3	1728	7.6262002	310407.1232	3387951.049
1728	32.08499908	50	3	1729	7.5966101	310457.1233	3387951.049
1729	32.04333496	50	3	1730	7.53866	310507.1234	3387951.049
1730	32.0385704	50	3	1731	7.5036702	310557.1235	3387951.049
1731	31.90999985	50	3	1732	7.3594398	310607.1237	3387951.049
1732	31.88800049	50	3	1733	7.2962999	310657.1238	3387951.049
1733	31.86000061	50	3	1734	7.17453	310707.1239	3387951.049
1734	31.89699936	50	3	1735	7.0560398	310757.124	3387951.049
1735	31.43333244	50	3	1736	6.8223901	310807.1241	3387951.049
1736	31.26124954	50	3	1737	6.4688601	310857.1243	3387951.049
1737	30.63666725	50	3	1738	6.2216001	310907.1244	3387951.049
1738	30.14875031	50	3	1739	6.3552899	310957.1245	3387951.049
1739	29.54166603	50	3	1740	5.85918	308107.1177	3387901.061
1740	23.75	50	3	1741	0.577866	308157.1178	3387901.061
1741	25.59000015	50	3	1742	3.2267399	308207.118	3387901.061
1742	29.72999954	50	3	1743	5.9835801	308257.1181	3387901.061
1743	30.92399979	50	3	1744	6.3278699	308307.1182	3387901.061
1744	30.2840004	50	3	1745	6.3541398	308357.1183	3387901.061
1745	30.72750092	50	3	1746	5.8506498	308407.1184	3387901.061
1746	30.16333389	50	3	1747	5.7410598	308457.1186	3387901.061
1747	30.12000084	50	3	1748	5.7690101	308507.1187	3387901.061
1748	30.16749954	50	3	1749	5.7645502	308557.1188	3387901.061
1749	30.20999908	50	3	1750	5.7895298	308607.1189	3387901.061
1750	30.82999992	50	3	1751	6.3555398	308657.119	3387901.061
1751	30.38249969	50	3	1752	6.1892099	308707.1192	3387901.061
1752	30.41500092	50	3	1753	6.1065302	308757.1193	3387901.061
1753	30.46500015	50	3	1754	6.0527701	308807.1194	3387901.061
1754	30.5	50	3	1755	6.02881	308857.1195	3387901.061
1755	30.875	50	3	1756	6.0021501	308907.1196	3387901.061
1756	31.25	50	3	1757	6.63836	308957.1197	3387901.061
1757	31.31599998	50	3	1758	7.0650802	309007.1199	3387901.061
1758	31.37249947	50	3	1759	6.8705101	309057.12	3387901.061
1759	31.99799919	50	3	1760	7.1043901	309107.1201	3387901.061
1760	31.67000008	50	3	1761	7.3657699	309157.1202	3387901.061
1761	31.14249992	50	3	1762	6.09235	309207.1203	3387901.061
1762	31.43666649	50	3	1763	6.7912302	309257.1205	3387901.061
1763	30.8214283	50	3	1764	6.4003701	309307.1206	3387901.061
1764	31.54750061	50	3	1765	7.3399801	309357.1207	3387901.061
1765	31.50166702	50	3	1766	7.4864602	309407.1208	3387901.061
1766	31.14333344	50	3	1767	6.7799501	309457.1209	3387901.061
1767	31.11000061	50	3	1768	6.7472801	309507.1211	3387901.061
1768	31.12999916	50	3	1769	6.73489	309557.1212	3387901.061
1769	30.47999954	50	3	1770	6.25387	309607.1213	3387901.061
1770	30.4533329	50	3	1771	6.01194	309657.1214	3387901.061
1771	30.44499969	50	3	1772	5.9843202	309707.1215	3387901.061
1772	30.46666718	50	3	1773	6.0199499	309757.1216	3387901.061
1773	30.46666718	50	3	1774	6.0123401	309807.1218	3387901.061
1774	30.67000008	50	3	1775	6.1922998	309857.1219	3387901.061
1775	30.77499962	50	3	1776	6.29496	309907.122	3387901.061
1776	31.5	50	3	1777	6.64428	309957.1221	3387901.061
1777	32.22249985	50	3	1778	7.7344499	310007.1222	3387901.061
1778	32.12833405	50	3	1779	7.7460899	310057.1224	3387901.061
1779	31.79999924	50	3	1780	7.3685398	310107.1225	3387901.061
1780	31.82500076	50	3	1781	7.3564401	310157.1226	3387901.061
1781	31.89500046	50	3	1782	7.4507899	310207.1227	3387901.061
1782	31.95249939	50	3	1783	7.5005002	310257.1228	3387901.061
1783	32.11000061	50	3	1784	7.5948501	310307.123	3387901.061
1784	32.14666748	50	3	1785	7.6372399	310357.1231	3387901.061
1785	32.16999817	50	3	1786	7.6781301	310407.1232	3387901.061
1786	32.18999863	50	3	1787	7.63241	310457.1233	3387901.061
1787	32.14500046	50	3	1788	7.6304898	310507.1234	3387901.061
1788	32.04499817	50	3	1789	7.5709	310557.1235	3387901.061
1789	32.04999924	50	3	1790	7.5471101	310607.1237	3387901.061
1790	31.90500069	50	3	1791	7.5074401	310657.1238	3387901.061
1791	31.99600029	50	3	1792	7.5314698	310707.1239	3387901.061
1792	31.74799919	50	3	1793	7.3836699	310757.124	3387901.061
1793	31.6875	50	3	1794	7.2328501	310807.1241	3387901.061
1794	31.51000023	50	3	1795	6.9108	310857.1243	3387901.061
1795	31.09000015	50	3	1796	6.4460001	310907.1244	3387901.061
1796	28.00499916	50	3	1797	2.48915	308107.1177	3387851.073
1797	24.37999916	50	3	1798	-0.480532	308157.1178	3387851.073
1798	30.10750008	50	3	1799	1.18111	308207.118	3387851.073
1799	27.9533329	50	3	1800	5.4184899	308257.1181	3387851.073
1800	30.26199913	50	3	1801	5.8295999	308307.1182	3387851.073
1801	30.50499916	50	3	1802	6.19484	308357.1183	3387851.073
1802	30.35499954	50	3	1803	6.0921202	308407.1184	3387851.073
1803	30.97249985	50	3	1804	5.9229202	308457.1186	3387851.073
1804	30.30200005	50	3	1805	5.7698998	308507.1187	3387851.073
1805	31.07749939	50	3	1806	5.8856802	308557.1188	3387851.073
1806	30.23999977	50	3	1807	5.8031602	308607.1189	3387851.073
1807	30.48500061	50	3	1808	5.8168402	308657.119	3387851.073
1808	30.23600006	50	3	1809	6.2904401	308707.1192	3387851.073
1809	31.41500092	50	3	1810	6.6406298	308757.1193	3387851.073
1810	30.97750092	50	3	1811	6.4285698	308807.1194	3387851.073
1811	30.59499931	50	3	1812	6.4351401	308857.1195	3387851.073
1812	31.13800049	50	3	1813	6.6462202	308907.1196	3387851.073
1813	31.62000084	50	3	1814	6.8625598	308957.1197	3387851.073
1814	31.37999916	50	3	1815	7.0195398	309007.1199	3387851.073
1815	31.56999969	50	3	1816	7.2781501	309057.12	3387851.073
1816	31.54000092	50	3	1817	7.4384599	309107.1201	3387851.073
1817	31.29000092	50	3	1818	7.1354098	309157.1202	3387851.073
1818	31.43000031	50	3	1819	6.3513799	309207.1203	3387851.073
1819	30.94799995	50	3	1820	6.6221199	309257.1205	3387851.073
1820	31.4640007	50	3	1821	6.4180398	309307.1206	3387851.073
1821	31.71999931	50	3	1822	6.9625502	309357.1207	3387851.073
1822	32.06999969	50	3	1823	7.5935898	309407.1208	3387851.073
1823	31.10000038	50	3	1824	6.8466401	309457.1209	3387851.073
1824	31.23749924	50	3	1825	6.7663498	309507.1211	3387851.073
1825	31.6060009	50	3	1826	6.7161899	309557.1212	3387851.073
1826	30.45999908	50	3	1827	6.2975998	309607.1213	3387851.073
1827	30.45999908	50	3	1828	6.0048099	309657.1214	3387851.073
1828	30.43250084	50	3	1829	5.9986901	309707.1215	3387851.073
1829	30.49333382	50	3	1830	6.0369	309757.1216	3387851.073
1830	30.42333412	50	3	1831	6.0234098	309807.1218	3387851.073
1831	30.72249985	50	3	1832	6.24792	309857.1219	3387851.073
1832	31	50	3	1833	6.3280902	309907.122	3387851.073
1833	31.4659996	50	3	1834	6.9330101	309957.1221	3387851.073
1834	31.89999962	50	3	1835	7.4876199	310007.1222	3387851.073
1835	31.65500069	50	3	1836	7.5158701	310057.1224	3387851.073
1836	31.64999962	50	3	1837	7.3135099	310107.1225	3387851.073
1837	31.64749908	50	3	1838	7.3182101	310157.1226	3387851.073
1838	31.73800087	50	3	1839	7.3829298	310207.1227	3387851.073
1839	31.71199989	50	3	1840	7.5222301	310257.1228	3387851.073
1840	32.02500153	50	3	1841	7.6088099	310307.123	3387851.073
1841	32.20000076	50	3	1842	7.6730299	310357.1231	3387851.073
1842	32.20000076	50	3	1843	7.7967601	310407.1232	3387851.073
1843	32.16199875	50	3	1844	7.7242398	310457.1233	3387851.073
1844	32.15333176	50	3	1845	7.72646	310507.1234	3387851.073
1845	32.06999969	50	3	1846	7.6480999	310557.1235	3387851.073
1846	32.22571564	50	3	1847	7.6265502	310607.1237	3387851.073
1847	31.94333267	50	3	1848	7.54145	310657.1238	3387851.073
1848	31.72500038	50	3	1849	7.4170299	310707.1239	3387851.073
1849	31.70999908	50	3	1850	7.3165398	310757.124	3387851.073
1850	31.65250015	50	3	1851	7.2167501	310807.1241	3387851.073
1851	31.13666725	50	3	1852	6.8961601	310857.1243	3387851.073
1852	30.20000076	50	3	1853	3.2676001	308057.1176	3387801.086
1853	25.92000008	50	3	1854	1.73129	308107.1177	3387801.086
1854	27.54800034	50	3	1855	0.722929	308157.1178	3387801.086
1855	30.61666679	50	3	1856	5.8562799	308207.118	3387801.086
1856	29.98800087	50	3	1857	3.57335	308257.1181	3387801.086
1857	28.01499939	50	3	1858	5.8213601	308307.1182	3387801.086
1858	30.2733326	50	3	1859	5.9179101	308357.1183	3387801.086
1859	30.21999931	50	3	1860	6.22855	308407.1184	3387801.086
1860	30.68000031	50	3	1861	6.16119	308457.1186	3387801.086
1861	31.18000031	50	3	1862	6.2044101	308507.1187	3387801.086
1862	30.31999969	50	3	1863	6.20472	308557.1188	3387801.086
1863	30.95800018	50	3	1864	6.26756	308607.1189	3387801.086
1864	30.21999931	50	3	1865	5.8537402	308657.119	3387801.086
1865	30.27199936	50	3	1866	5.8470402	308707.1192	3387801.086
1866	30.54999924	50	3	1867	6.70502	308757.1193	3387801.086
1867	31.30249977	50	3	1868	7.1456599	308807.1194	3387801.086
1868	31.58749962	50	3	1869	6.4909801	308857.1195	3387801.086
1869	30.5466671	50	3	1870	6.7223201	308907.1196	3387801.086
1870	31.4279995	50	3	1871	6.9720001	308957.1197	3387801.086
1871	31.21999931	50	3	1872	7.11307	309007.1199	3387801.086
1872	31.50200081	50	3	1873	7.1609602	309057.12	3387801.086
1873	31.94199944	50	3	1874	7.2336898	309107.1201	3387801.086
1874	30.41250038	50	3	1875	6.7091398	309157.1202	3387801.086
1875	31.57999992	50	3	1876	6.5964899	309207.1203	3387801.086
1876	30.85750008	50	3	1877	6.5281601	309257.1205	3387801.086
1877	31.51199913	50	3	1878	7.0696001	309307.1206	3387801.086
1878	31.80500031	50	3	1879	7.3792801	309357.1207	3387801.086
1879	32.16500092	50	3	1880	7.5126901	309407.1208	3387801.086
1880	31.00600052	50	3	1881	6.8447299	309457.1209	3387801.086
1881	31.16666603	50	3	1882	6.7705498	309507.1211	3387801.086
1882	30.86000061	50	3	1883	6.6538601	309557.1212	3387801.086
1883	30.44499969	50	3	1884	6.1286998	309607.1213	3387801.086
1884	30.45000076	50	3	1885	6.0338101	309657.1214	3387801.086
1885	30.50333405	50	3	1886	6.0176902	309707.1215	3387801.086
1886	30.46166611	50	3	1887	6.0328302	309757.1216	3387801.086
1887	30.4683342	50	3	1888	6.03369	309807.1218	3387801.086
1888	31.15600014	50	3	1889	6.4194498	309857.1219	3387801.086
1889	31.69599915	50	3	1890	6.8751302	309907.122	3387801.086
1890	31.65399933	50	3	1891	7.0690799	309957.1221	3387801.086
1891	31.45999908	50	3	1892	7.1203799	310007.1222	3387801.086
1892	31.45499992	50	3	1893	7.1160998	310057.1224	3387801.086
1893	31.40999985	50	3	1894	7.1159	310107.1225	3387801.086
1894	31.51749992	50	3	1895	7.1568499	310157.1226	3387801.086
1895	31.68000031	50	3	1896	7.32342	310207.1227	3387801.086
1896	31.94750023	50	3	1897	7.4923701	310257.1228	3387801.086
1897	32.25249863	50	3	1898	7.6689801	310307.123	3387801.086
1898	32.51599884	50	3	1899	7.8558202	310357.1231	3387801.086
1899	32.44599915	50	3	1900	7.9948301	310407.1232	3387801.086
1900	32.34000015	50	3	1901	7.95818	310457.1233	3387801.086
1901	32.27000046	50	3	1902	7.8106198	310507.1234	3387801.086
1902	32.02500153	50	3	1903	7.7604299	310557.1235	3387801.086
1903	31.88333321	50	3	1904	7.63024	310607.1237	3387801.086
1904	31.71500015	50	3	1905	7.4376798	310657.1238	3387801.086
1905	31.71500015	50	3	1906	7.3471899	310707.1239	3387801.086
1906	31.54500008	50	3	1907	7.2266698	310757.124	3387801.086
1907	31.33886909	50	3	1908	7.06005	310807.1241	3387801.086
1908	29.47166634	50	3	1909	4.9509201	308007.1175	3387751.098
1909	25.54500008	50	3	1910	1.7120399	308057.1176	3387751.098
1910	30.67250061	50	3	1911	1.56568	308107.1177	3387751.098
1911	29.48999977	50	3	1912	1.8719	308157.1178	3387751.098
1912	28.7033329	50	3	1913	5.8610101	308207.118	3387751.098
1913	31.02090073	50	3	1914	6.2988501	308257.1181	3387751.098
1914	30.76799965	50	3	1915	5.1217599	308307.1182	3387751.098
1915	29.95999908	50	3	1916	5.8902798	308357.1183	3387751.098
1916	30.18636703	50	3	1917	5.91571	308407.1184	3387751.098
1917	30.29000092	50	3	1918	6.0306301	308457.1186	3387751.098
1918	31.19199944	50	3	1919	6.7087002	308507.1187	3387751.098
1919	30.9985714	50	3	1920	6.4604101	308557.1188	3387751.098
1920	30.30833244	50	3	1921	6.5057902	308607.1189	3387751.098
1921	31.0466671	50	3	1922	6.3181	308657.119	3387751.098
1922	30.20199966	50	3	1923	5.9274502	308707.1192	3387751.098
1923	30.24749947	50	3	1924	5.8712502	308757.1193	3387751.098
1924	30.44000053	50	3	1925	6.7592001	308807.1194	3387751.098
1925	31.00499916	50	3	1926	6.99681	308857.1195	3387751.098
1926	30.26000023	50	3	1927	6.6010199	308907.1196	3387751.098
1927	30.44599915	50	3	1928	6.6062298	308957.1197	3387751.098
1928	31.17399979	50	3	1929	6.61871	309007.1199	3387751.098
1929	31.13500023	50	3	1930	6.8341198	309057.12	3387751.098
1930	31.80500031	50	3	1931	7.1884999	309107.1201	3387751.098
1931	30.40600014	50	3	1932	6.0538702	309157.1202	3387751.098
1932	30.90600014	50	3	1933	6.5275502	309207.1203	3387751.098
1933	30.71500015	50	3	1934	6.4974599	309257.1205	3387751.098
1934	31.46750069	50	3	1935	7.0857701	309307.1206	3387751.098
1935	31.96999931	50	3	1936	7.3684402	309357.1207	3387751.098
1936	31.81599998	50	3	1937	7.5229502	309407.1208	3387751.098
1937	31.75600052	50	3	1938	6.85747	309457.1209	3387751.098
1938	31.19599915	50	3	1939	6.7698102	309507.1211	3387751.098
1939	30.89166641	50	3	1940	6.5993199	309557.1212	3387751.098
1940	30.4216671	50	3	1941	6.0729399	309607.1213	3387751.098
1941	30.45499992	50	3	1942	6.0319099	309657.1214	3387751.098
1942	30.54999924	50	3	1943	6.0408702	309707.1215	3387751.098
1943	30.51000023	50	3	1944	6.0613699	309757.1216	3387751.098
1944	30.94499969	50	3	1945	6.2270398	309807.1218	3387751.098
1945	31.78199959	50	3	1946	6.9562898	309857.1219	3387751.098
1946	32.04399872	50	3	1947	7.4390302	309907.122	3387751.098
1947	31.91399956	50	3	1948	7.3965702	309957.1221	3387751.098
1948	31.50250053	50	3	1949	7.0669198	310007.1222	3387751.098
1949	31.45999908	50	3	1950	7.0097198	310057.1224	3387751.098
1950	31.33799934	50	3	1951	6.9993701	310107.1225	3387751.098
1951	31.32999992	50	3	1952	6.99334	310157.1226	3387751.098
1952	31.49799919	50	3	1953	7.0890598	310207.1227	3387751.098
1953	32.14250183	50	3	1954	7.49194	310257.1228	3387751.098
1954	32.79000092	50	3	1955	7.8586502	310307.123	3387751.098
1955	32.22249985	50	3	1956	7.97159	310357.1231	3387751.098
1956	32.48988724	50	3	1957	7.9992299	310407.1232	3387751.098
1957	32.26499939	50	3	1958	7.8696098	310457.1233	3387751.098
1958	32.47999954	50	3	1959	7.7638502	310507.1234	3387751.098
1959	32.51250076	50	3	1960	7.6395302	310557.1235	3387751.098
1960	31.79800034	50	3	1961	7.5040398	310607.1237	3387751.098
1961	31.70000076	50	3	1962	7.3310499	310657.1238	3387751.098
1962	31.58499908	50	3	1963	7.2600298	310707.1239	3387751.098
1963	31.48999977	50	3	1964	7.1374698	310757.124	3387751.098
1964	30.95999908	50	3	1965	6.8278499	310807.1241	3387751.098
1965	31.14999962	50	3	1966	6.7026601	307957.1174	3387701.11
1966	30.79500008	50	3	1967	6.41113	308007.1175	3387701.11
1967	29.01000023	50	3	1968	5.8762398	308057.1176	3387701.11
1968	29.84666634	50	3	1969	5.8910499	308107.1177	3387701.11
1969	30.70199966	50	3	1970	6.0086298	308157.1178	3387701.11
1970	29.94799995	50	3	1971	5.2887402	308207.118	3387701.11
1971	29.76499939	50	3	1972	5.9643798	308257.1181	3387701.11
1972	30.88249969	50	3	1973	6.1515002	308307.1182	3387701.11
1973	29.47999954	50	3	1974	5.5990701	308357.1183	3387701.11
1974	30.83250046	50	3	1975	5.72928	308407.1184	3387701.11
1975	27.96666718	50	3	1976	5.82829	308457.1186	3387701.11
1976	30.3939991	50	3	1977	5.9416099	308507.1187	3387701.11
1977	30.32999992	50	3	1978	6.4297199	308557.1188	3387701.11
1978	30.97599983	50	3	1979	6.1817899	308607.1189	3387701.11
1979	30.49250031	50	3	1980	6.4692998	308657.119	3387701.11
1980	30.87999916	50	3	1981	6.14994	308707.1192	3387701.11
1981	30.96199989	50	3	1982	6.4889202	308757.1193	3387701.11
1982	30.25	50	3	1983	5.86584	308807.1194	3387701.11
1983	30.74500084	50	3	1984	6.3694701	308857.1195	3387701.11
1984	30.45999908	50	3	1985	6.4612498	308907.1196	3387701.11
1985	30.31500053	50	3	1986	6.34723	308957.1197	3387701.11
1986	31.13750076	50	3	1987	6.6880398	309007.1199	3387701.11
1987	31.66399956	50	3	1988	6.9904499	309057.12	3387701.11
1988	30.56999969	50	3	1989	7.0825601	309107.1201	3387701.11
1989	30.62333298	50	3	1990	6.0946798	309157.1202	3387701.11
1990	31.05400085	50	3	1991	6.6670198	309207.1203	3387701.11
1991	30.63999939	50	3	1992	6.6685901	309257.1205	3387701.11
1992	31.3579998	50	3	1993	7.0959702	309307.1206	3387701.11
1993	31.21249962	50	3	1994	7.4876099	309357.1207	3387701.11
1994	31.09250069	50	3	1995	7.4520302	309407.1208	3387701.11
1995	32.12333298	50	3	1996	7.1649699	309457.1209	3387701.11
1996	31.26399994	50	3	1997	6.7930102	309507.1211	3387701.11
1997	30.87199974	50	3	1998	6.6055899	309557.1212	3387701.11
1998	30.45508003	50	3	1999	6.0749698	309607.1213	3387701.11
[truncated: 162,521 more rows]
