# Supplementary material for: A multi-proxy assessment of terrace formation in the lower Trinity River valley, Texas
Source: Copernicus journal article supplement (doi:10.5194/esurf-10-635-2022), 2022-06-28
Supplement: Supplementary file 1 [file esurf-10-635-2022-supplement.zip › Terrace_10m_valley_plane_elevation.csv]

FID	pointid	grid_code	POINT_X	POINT_Y
0	375	24.9904995	308677.1102	3389722.395
1	376	24.9906006	308687.1102	3389722.395
2	377	24.9906998	308697.1102	3389722.395
3	378	24.9908009	308707.1102	3389722.395
4	379	24.9909	308717.1102	3389722.395
5	380	24.9909992	308727.1102	3389722.395
6	381	24.9911003	308737.1102	3389722.395
7	382	24.9911995	308747.1102	3389722.395
8	383	24.9913006	308757.1102	3389722.395
9	384	24.9913998	308767.1102	3389722.395
10	385	24.9915009	308777.1102	3389722.395
11	386	24.9916	308787.1102	3389722.395
12	387	24.9916992	308797.1102	3389722.395
13	388	24.9918003	308807.1102	3389722.395
14	389	24.9918995	308817.1102	3389722.395
15	390	24.9920006	308827.1102	3389722.395
16	391	24.9920998	308837.1102	3389722.395
17	392	24.9922009	308847.1102	3389722.395
18	393	24.9923	308857.1102	3389722.395
19	394	24.9923992	308867.1102	3389722.395
20	395	24.9925003	308877.1102	3389722.395
21	396	24.9925995	308887.1102	3389722.395
22	3571	24.9876003	308687.1102	3389712.395
23	3572	24.9876995	308697.1102	3389712.395
24	3573	24.9878006	308707.1102	3389712.395
25	3574	24.9878998	308717.1102	3389712.395
26	3575	24.9880009	308727.1102	3389712.395
27	3576	24.9881001	308737.1102	3389712.395
28	3577	24.9881992	308747.1102	3389712.395
29	3578	24.9883003	308757.1102	3389712.395
30	3579	24.9883995	308767.1102	3389712.395
31	3580	24.9885006	308777.1102	3389712.395
32	3581	24.9885998	308787.1102	3389712.395
33	3582	24.9887009	308797.1102	3389712.395
34	3583	24.9888	308807.1102	3389712.395
35	3584	24.9888992	308817.1102	3389712.395
36	3585	24.9890003	308827.1102	3389712.395
37	3586	24.9890995	308837.1102	3389712.395
38	3587	24.9892006	308847.1102	3389712.395
39	3588	24.9892998	308857.1102	3389712.395
40	3589	24.9894009	308867.1102	3389712.395
41	3590	24.9895	308877.1102	3389712.395
42	3591	24.9895992	308887.1102	3389712.395
43	3592	24.9897003	308897.1102	3389712.395
44	3593	24.9897995	308907.1102	3389712.395
45	3594	24.9899006	308917.1102	3389712.395
46	3595	24.9899006	308927.1102	3389712.395
47	3596	24.9899998	308937.1102	3389712.395
48	3597	24.9901009	308947.1102	3389712.395
49	3598	24.9902	308957.1102	3389712.395
50	3599	24.9902992	308967.1102	3389712.395
51	3600	24.9904003	308977.1102	3389712.395
52	3601	24.9904995	308987.1102	3389712.395
53	3602	24.9906006	308997.1102	3389712.395
54	3603	24.9906998	309007.1102	3389712.395
55	3604	24.9908009	309017.1102	3389712.395
56	3605	24.9909	309027.1102	3389712.395
57	3606	24.9909992	309037.1102	3389712.395
58	3607	24.9911003	309047.1102	3389712.395
59	3608	24.9911995	309057.1102	3389712.395
60	3609	24.9913006	309067.1102	3389712.395
61	3610	24.9913998	309077.1102	3389712.395
62	3611	24.9915009	309087.1102	3389712.395
63	3612	24.9916	309097.1102	3389712.395
64	3613	24.9916992	309107.1102	3389712.395
65	3614	24.9918003	309117.1102	3389712.395
66	3615	24.9918995	309127.1102	3389712.395
67	3616	24.9920006	309137.1102	3389712.395
68	3617	24.9920998	309147.1102	3389712.395
69	3618	24.9922009	309157.1102	3389712.395
70	3619	24.9923	309167.1102	3389712.395
71	3620	24.9923992	309177.1102	3389712.395
72	3621	24.9925003	309187.1102	3389712.395
73	3622	24.9925995	309197.1102	3389712.395
74	3623	24.9927006	309207.1102	3389712.395
75	3624	24.9927998	309217.1102	3389712.395
76	3625	24.9929008	309227.1102	3389712.395
77	3626	24.993	309237.1102	3389712.395
78	3627	24.9930992	309247.1102	3389712.395
79	3628	24.9932003	309257.1102	3389712.395
80	3629	24.9932995	309267.1102	3389712.395
81	3630	24.9934006	309277.1102	3389712.395
82	3631	24.9934998	309287.1102	3389712.395
83	3632	24.9936008	309297.1102	3389712.395
84	3633	24.9937	309307.1102	3389712.395
85	3634	24.9937992	309317.1102	3389712.395
86	3635	24.9939003	309327.1102	3389712.395
87	3636	24.9939995	309337.1102	3389712.395
88	3637	24.9941006	309347.1102	3389712.395
89	3638	24.9941998	309357.1102	3389712.395
90	3639	24.9943008	309367.1102	3389712.395
91	3640	24.9944	309377.1102	3389712.395
92	3641	24.9944992	309387.1102	3389712.395
93	3642	24.9946003	309397.1102	3389712.395
94	3643	24.9946003	309407.1102	3389712.395
95	3644	24.9946995	309417.1102	3389712.395
96	3645	24.9948006	309427.1102	3389712.395
97	3646	24.9948997	309437.1102	3389712.395
98	3647	24.9950008	309447.1102	3389712.395
99	3648	24.9951	309457.1102	3389712.395
100	3649	24.9951992	309467.1102	3389712.395
101	3650	24.9953003	309477.1102	3389712.395
102	3651	24.9953995	309487.1102	3389712.395
103	3652	24.9955006	309497.1102	3389712.395
104	3653	24.9955997	309507.1102	3389712.395
105	3654	24.9957008	309517.1102	3389712.395
106	3655	24.9958	309527.1102	3389712.395
107	3656	24.9958992	309537.1102	3389712.395
108	3657	24.9960003	309547.1102	3389712.395
109	3658	24.9960995	309557.1102	3389712.395
110	3659	24.9962006	309567.1102	3389712.395
111	6766	24.9846001	308687.1102	3389702.395
112	6767	24.9846992	308697.1102	3389702.395
113	6768	24.9848003	308707.1102	3389702.395
114	6769	24.9848995	308717.1102	3389702.395
115	6770	24.9850006	308727.1102	3389702.395
116	6771	24.9850998	308737.1102	3389702.395
117	6772	24.9852009	308747.1102	3389702.395
118	6773	24.9853001	308757.1102	3389702.395
119	6774	24.9853001	308767.1102	3389702.395
120	6775	24.9853992	308777.1102	3389702.395
121	6776	24.9855003	308787.1102	3389702.395
122	6777	24.9855995	308797.1102	3389702.395
123	6778	24.9857006	308807.1102	3389702.395
124	6779	24.9857998	308817.1102	3389702.395
125	6780	24.9859009	308827.1102	3389702.395
126	6781	24.9860001	308837.1102	3389702.395
127	6782	24.9860992	308847.1102	3389702.395
128	6783	24.9862003	308857.1102	3389702.395
129	6784	24.9862995	308867.1102	3389702.395
130	6785	24.9864006	308877.1102	3389702.395
131	6786	24.9864998	308887.1102	3389702.395
132	6787	24.9866009	308897.1102	3389702.395
133	6788	24.9867001	308907.1102	3389702.395
134	6789	24.9867992	308917.1102	3389702.395
135	6790	24.9869003	308927.1102	3389702.395
136	6791	24.9869995	308937.1102	3389702.395
137	6792	24.9871006	308947.1102	3389702.395
138	6793	24.9871998	308957.1102	3389702.395
139	6794	24.9873009	308967.1102	3389702.395
140	6795	24.9874001	308977.1102	3389702.395
141	6796	24.9874992	308987.1102	3389702.395
142	6797	24.9876003	308997.1102	3389702.395
143	6798	24.9876995	309007.1102	3389702.395
144	6799	24.9878006	309017.1102	3389702.395
145	6800	24.9878998	309027.1102	3389702.395
146	6801	24.9880009	309037.1102	3389702.395
147	6802	24.9881001	309047.1102	3389702.395
148	6803	24.9881992	309057.1102	3389702.395
149	6804	24.9883003	309067.1102	3389702.395
150	6805	24.9883995	309077.1102	3389702.395
151	6806	24.9885006	309087.1102	3389702.395
152	6807	24.9885998	309097.1102	3389702.395
153	6808	24.9887009	309107.1102	3389702.395
154	6809	24.9888	309117.1102	3389702.395
155	6810	24.9888992	309127.1102	3389702.395
156	6811	24.9890003	309137.1102	3389702.395
157	6812	24.9890995	309147.1102	3389702.395
158	6813	24.9892006	309157.1102	3389702.395
159	6814	24.9892998	309167.1102	3389702.395
160	6815	24.9894009	309177.1102	3389702.395
161	6816	24.9895	309187.1102	3389702.395
162	6817	24.9895992	309197.1102	3389702.395
163	6818	24.9897003	309207.1102	3389702.395
164	6819	24.9897995	309217.1102	3389702.395
165	6820	24.9899006	309227.1102	3389702.395
166	6821	24.9899998	309237.1102	3389702.395
167	6822	24.9899998	309247.1102	3389702.395
168	6823	24.9901009	309257.1102	3389702.395
169	6824	24.9902	309267.1102	3389702.395
170	6825	24.9902992	309277.1102	3389702.395
171	6826	24.9904003	309287.1102	3389702.395
172	6827	24.9904995	309297.1102	3389702.395
173	6828	24.9906006	309307.1102	3389702.395
174	6829	24.9906998	309317.1102	3389702.395
175	6830	24.9908009	309327.1102	3389702.395
176	6831	24.9909	309337.1102	3389702.395
177	6832	24.9909992	309347.1102	3389702.395
178	6833	24.9911003	309357.1102	3389702.395
179	6834	24.9911995	309367.1102	3389702.395
180	6835	24.9913006	309377.1102	3389702.395
181	6836	24.9913998	309387.1102	3389702.395
182	6837	24.9915009	309397.1102	3389702.395
183	6838	24.9916	309407.1102	3389702.395
184	6839	24.9916992	309417.1102	3389702.395
185	6840	24.9918003	309427.1102	3389702.395
186	6841	24.9918995	309437.1102	3389702.395
187	6842	24.9920006	309447.1102	3389702.395
188	6843	24.9920998	309457.1102	3389702.395
189	6844	24.9922009	309467.1102	3389702.395
190	6845	24.9923	309477.1102	3389702.395
191	6846	24.9923992	309487.1102	3389702.395
192	6847	24.9925003	309497.1102	3389702.395
193	6848	24.9925995	309507.1102	3389702.395
194	6849	24.9927006	309517.1102	3389702.395
195	6850	24.9927998	309527.1102	3389702.395
196	6851	24.9929008	309537.1102	3389702.395
197	6852	24.993	309547.1102	3389702.395
198	6853	24.9930992	309557.1102	3389702.395
199	6854	24.9932003	309567.1102	3389702.395
200	6855	24.9932995	309577.1102	3389702.395
201	6856	24.9934006	309587.1102	3389702.395
202	6857	24.9934998	309597.1102	3389702.395
203	6858	24.9936008	309607.1102	3389702.395
204	6859	24.9937	309617.1102	3389702.395
205	6860	24.9937992	309627.1102	3389702.395
206	6861	24.9939003	309637.1102	3389702.395
207	6862	24.9939995	309647.1102	3389702.395
208	6863	24.9941006	309657.1102	3389702.395
209	6864	24.9941998	309667.1102	3389702.395
210	6865	24.9943008	309677.1102	3389702.395
211	6866	24.9944	309687.1102	3389702.395
212	6867	24.9944992	309697.1102	3389702.395
213	6868	24.9946003	309707.1102	3389702.395
214	6869	24.9946003	309717.1102	3389702.395
215	6870	24.9946995	309727.1102	3389702.395
216	6871	24.9948006	309737.1102	3389702.395
217	6872	24.9948997	309747.1102	3389702.395
218	9961	24.9815006	308687.1102	3389692.395
219	9962	24.9815998	308697.1102	3389692.395
220	9963	24.9817009	308707.1102	3389692.395
221	9964	24.9818001	308717.1102	3389692.395
222	9965	24.9818993	308727.1102	3389692.395
223	9966	24.9820004	308737.1102	3389692.395
224	9967	24.9820995	308747.1102	3389692.395
225	9968	24.9822006	308757.1102	3389692.395
226	9969	24.9822998	308767.1102	3389692.395
227	9970	24.9824009	308777.1102	3389692.395
228	9971	24.9825001	308787.1102	3389692.395
229	9972	24.9825993	308797.1102	3389692.395
230	9973	24.9827003	308807.1102	3389692.395
231	9974	24.9827995	308817.1102	3389692.395
232	9975	24.9829006	308827.1102	3389692.395
233	9976	24.9829998	308837.1102	3389692.395
234	9977	24.9831009	308847.1102	3389692.395
235	9978	24.9832001	308857.1102	3389692.395
236	9979	24.9832993	308867.1102	3389692.395
237	9980	24.9834003	308877.1102	3389692.395
238	9981	24.9834995	308887.1102	3389692.395
239	9982	24.9836006	308897.1102	3389692.395
240	9983	24.9836998	308907.1102	3389692.395
241	9984	24.9838009	308917.1102	3389692.395
242	9985	24.9839001	308927.1102	3389692.395
243	9986	24.9839993	308937.1102	3389692.395
244	9987	24.9841003	308947.1102	3389692.395
245	9988	24.9841995	308957.1102	3389692.395
246	9989	24.9843006	308967.1102	3389692.395
247	9990	24.9843998	308977.1102	3389692.395
248	9991	24.9845009	308987.1102	3389692.395
249	9992	24.9846001	308997.1102	3389692.395
250	9993	24.9846992	309007.1102	3389692.395
251	9994	24.9848003	309017.1102	3389692.395
252	9995	24.9848995	309027.1102	3389692.395
253	9996	24.9850006	309037.1102	3389692.395
254	9997	24.9850998	309047.1102	3389692.395
255	9998	24.9852009	309057.1102	3389692.395
256	9999	24.9853001	309067.1102	3389692.395
257	10000	24.9853001	309077.1102	3389692.395
258	10001	24.9853992	309087.1102	3389692.395
259	10002	24.9855003	309097.1102	3389692.395
260	10003	24.9855995	309107.1102	3389692.395
261	10004	24.9857006	309117.1102	3389692.395
262	10005	24.9857998	309127.1102	3389692.395
263	10006	24.9859009	309137.1102	3389692.395
264	10007	24.9860001	309147.1102	3389692.395
265	10008	24.9860992	309157.1102	3389692.395
266	10009	24.9862003	309167.1102	3389692.395
267	10010	24.9862995	309177.1102	3389692.395
268	10011	24.9864006	309187.1102	3389692.395
269	10012	24.9864998	309197.1102	3389692.395
270	10013	24.9866009	309207.1102	3389692.395
271	10014	24.9867001	309217.1102	3389692.395
272	10015	24.9867992	309227.1102	3389692.395
273	10016	24.9869003	309237.1102	3389692.395
274	10017	24.9869995	309247.1102	3389692.395
275	10018	24.9871006	309257.1102	3389692.395
276	10019	24.9871998	309267.1102	3389692.395
277	10020	24.9873009	309277.1102	3389692.395
278	10021	24.9874001	309287.1102	3389692.395
279	10022	24.9874992	309297.1102	3389692.395
280	10023	24.9876003	309307.1102	3389692.395
281	10024	24.9876995	309317.1102	3389692.395
282	10025	24.9878006	309327.1102	3389692.395
283	10026	24.9878998	309337.1102	3389692.395
284	10027	24.9880009	309347.1102	3389692.395
285	10028	24.9881001	309357.1102	3389692.395
286	10029	24.9881992	309367.1102	3389692.395
287	10030	24.9883003	309377.1102	3389692.395
288	10031	24.9883995	309387.1102	3389692.395
289	10032	24.9885006	309397.1102	3389692.395
290	10033	24.9885998	309407.1102	3389692.395
291	10034	24.9887009	309417.1102	3389692.395
292	10035	24.9888	309427.1102	3389692.395
293	10036	24.9888992	309437.1102	3389692.395
294	10037	24.9890003	309447.1102	3389692.395
295	10038	24.9890995	309457.1102	3389692.395
296	10039	24.9892006	309467.1102	3389692.395
297	10040	24.9892998	309477.1102	3389692.395
298	10041	24.9894009	309487.1102	3389692.395
299	10042	24.9895	309497.1102	3389692.395
300	10043	24.9895992	309507.1102	3389692.395
301	10044	24.9897003	309517.1102	3389692.395
302	10045	24.9897995	309527.1102	3389692.395
303	10046	24.9899006	309537.1102	3389692.395
304	10047	24.9899998	309547.1102	3389692.395
305	10048	24.9899998	309557.1102	3389692.395
306	10049	24.9901009	309567.1102	3389692.395
307	10050	24.9902	309577.1102	3389692.395
308	10051	24.9902992	309587.1102	3389692.395
309	10052	24.9904003	309597.1102	3389692.395
310	10053	24.9904995	309607.1102	3389692.395
311	10054	24.9906006	309617.1102	3389692.395
312	10055	24.9906998	309627.1102	3389692.395
313	10056	24.9908009	309637.1102	3389692.395
314	10057	24.9909	309647.1102	3389692.395
315	10058	24.9909992	309657.1102	3389692.395
316	10059	24.9911003	309667.1102	3389692.395
317	10060	24.9911995	309677.1102	3389692.395
318	10061	24.9913006	309687.1102	3389692.395
319	10062	24.9913998	309697.1102	3389692.395
320	10063	24.9915009	309707.1102	3389692.395
321	10064	24.9916	309717.1102	3389692.395
322	10065	24.9916992	309727.1102	3389692.395
323	10066	24.9918003	309737.1102	3389692.395
324	13156	24.9785004	308687.1102	3389682.395
325	13157	24.9785995	308697.1102	3389682.395
326	13158	24.9787006	308707.1102	3389682.395
327	13159	24.9787998	308717.1102	3389682.395
328	13160	24.9789009	308727.1102	3389682.395
329	13161	24.9790001	308737.1102	3389682.395
330	13162	24.9790993	308747.1102	3389682.395
331	13163	24.9792004	308757.1102	3389682.395
332	13164	24.9792995	308767.1102	3389682.395
333	13165	24.9794006	308777.1102	3389682.395
334	13166	24.9794998	308787.1102	3389682.395
335	13167	24.9796009	308797.1102	3389682.395
336	13168	24.9797001	308807.1102	3389682.395
337	13169	24.9797993	308817.1102	3389682.395
338	13170	24.9799004	308827.1102	3389682.395
339	13171	24.9799995	308837.1102	3389682.395
340	13172	24.9801006	308847.1102	3389682.395
341	13173	24.9801998	308857.1102	3389682.395
342	13174	24.9803009	308867.1102	3389682.395
343	13175	24.9804001	308877.1102	3389682.395
344	13176	24.9804993	308887.1102	3389682.395
345	13177	24.9806004	308897.1102	3389682.395
346	13178	24.9806995	308907.1102	3389682.395
347	13179	24.9808006	308917.1102	3389682.395
348	13180	24.9808006	308927.1102	3389682.395
349	13181	24.9808998	308937.1102	3389682.395
350	13182	24.9810009	308947.1102	3389682.395
351	13183	24.9811001	308957.1102	3389682.395
352	13184	24.9811993	308967.1102	3389682.395
353	13185	24.9813004	308977.1102	3389682.395
354	13186	24.9813995	308987.1102	3389682.395
355	13187	24.9815006	308997.1102	3389682.395
356	13188	24.9815998	309007.1102	3389682.395
357	13189	24.9817009	309017.1102	3389682.395
358	13190	24.9818001	309027.1102	3389682.395
359	13191	24.9818993	309037.1102	3389682.395
360	13192	24.9820004	309047.1102	3389682.395
361	13193	24.9820995	309057.1102	3389682.395
362	13194	24.9822006	309067.1102	3389682.395
363	13195	24.9822998	309077.1102	3389682.395
364	13196	24.9824009	309087.1102	3389682.395
365	13197	24.9825001	309097.1102	3389682.395
366	13198	24.9825993	309107.1102	3389682.395
367	13199	24.9827003	309117.1102	3389682.395
368	13200	24.9827995	309127.1102	3389682.395
369	13201	24.9829006	309137.1102	3389682.395
370	13202	24.9829998	309147.1102	3389682.395
371	13203	24.9831009	309157.1102	3389682.395
372	13204	24.9832001	309167.1102	3389682.395
373	13205	24.9832993	309177.1102	3389682.395
374	13206	24.9834003	309187.1102	3389682.395
375	13207	24.9834995	309197.1102	3389682.395
376	13208	24.9836006	309207.1102	3389682.395
377	13209	24.9836998	309217.1102	3389682.395
378	13210	24.9838009	309227.1102	3389682.395
379	13211	24.9839001	309237.1102	3389682.395
380	13212	24.9839993	309247.1102	3389682.395
381	13213	24.9841003	309257.1102	3389682.395
382	13214	24.9841995	309267.1102	3389682.395
383	13215	24.9843006	309277.1102	3389682.395
384	13216	24.9843998	309287.1102	3389682.395
385	13217	24.9845009	309297.1102	3389682.395
386	13218	24.9846001	309307.1102	3389682.395
387	13219	24.9846992	309317.1102	3389682.395
388	13220	24.9848003	309327.1102	3389682.395
389	13221	24.9848995	309337.1102	3389682.395
390	13222	24.9850006	309347.1102	3389682.395
391	13223	24.9850998	309357.1102	3389682.395
392	13224	24.9852009	309367.1102	3389682.395
393	13225	24.9853001	309377.1102	3389682.395
394	13226	24.9853992	309387.1102	3389682.395
395	13227	24.9853992	309397.1102	3389682.395
396	13228	24.9855003	309407.1102	3389682.395
397	13229	24.9855995	309417.1102	3389682.395
398	13230	24.9857006	309427.1102	3389682.395
399	13231	24.9857998	309437.1102	3389682.395
400	13232	24.9859009	309447.1102	3389682.395
401	13233	24.9860001	309457.1102	3389682.395
402	13234	24.9860992	309467.1102	3389682.395
403	13235	24.9862003	309477.1102	3389682.395
404	13236	24.9862995	309487.1102	3389682.395
405	13237	24.9864006	309497.1102	3389682.395
406	13238	24.9864998	309507.1102	3389682.395
407	13239	24.9866009	309517.1102	3389682.395
408	13240	24.9867001	309527.1102	3389682.395
409	13241	24.9867992	309537.1102	3389682.395
410	13242	24.9869003	309547.1102	3389682.395
411	13243	24.9869995	309557.1102	3389682.395
412	13244	24.9871006	309567.1102	3389682.395
413	13245	24.9871998	309577.1102	3389682.395
414	13246	24.9873009	309587.1102	3389682.395
415	13247	24.9874001	309597.1102	3389682.395
416	13248	24.9874992	309607.1102	3389682.395
417	13249	24.9876003	309617.1102	3389682.395
418	13250	24.9876995	309627.1102	3389682.395
419	13251	24.9878006	309637.1102	3389682.395
420	13252	24.9878998	309647.1102	3389682.395
421	13253	24.9880009	309657.1102	3389682.395
422	13254	24.9881001	309667.1102	3389682.395
423	13255	24.9881992	309677.1102	3389682.395
424	13256	24.9883003	309687.1102	3389682.395
425	13257	24.9883995	309697.1102	3389682.395
426	13258	24.9885006	309707.1102	3389682.395
427	13259	24.9885998	309717.1102	3389682.395
428	13260	24.9887009	309727.1102	3389682.395
429	16351	24.9755001	308687.1102	3389672.395
430	16352	24.9755993	308697.1102	3389672.395
431	16353	24.9757004	308707.1102	3389672.395
432	16354	24.9757996	308717.1102	3389672.395
433	16355	24.9759007	308727.1102	3389672.395
434	16356	24.9759998	308737.1102	3389672.395
435	16357	24.9761009	308747.1102	3389672.395
436	16358	24.9762001	308757.1102	3389672.395
437	16359	24.9762001	308767.1102	3389672.395
438	16360	24.9762993	308777.1102	3389672.395
439	16361	24.9764004	308787.1102	3389672.395
440	16362	24.9764996	308797.1102	3389672.395
441	16363	24.9766006	308807.1102	3389672.395
442	16364	24.9766998	308817.1102	3389672.395
443	16365	24.9768009	308827.1102	3389672.395
444	16366	24.9769001	308837.1102	3389672.395
445	16367	24.9769993	308847.1102	3389672.395
446	16368	24.9771004	308857.1102	3389672.395
447	16369	24.9771996	308867.1102	3389672.395
448	16370	24.9773006	308877.1102	3389672.395
449	16371	24.9773998	308887.1102	3389672.395
450	16372	24.9775009	308897.1102	3389672.395
451	16373	24.9776001	308907.1102	3389672.395
452	16374	24.9776993	308917.1102	3389672.395
453	16375	24.9778004	308927.1102	3389672.395
454	16376	24.9778996	308937.1102	3389672.395
455	16377	24.9780006	308947.1102	3389672.395
456	16378	24.9780998	308957.1102	3389672.395
457	16379	24.9782009	308967.1102	3389672.395
458	16380	24.9783001	308977.1102	3389672.395
459	16381	24.9783993	308987.1102	3389672.395
460	16382	24.9785004	308997.1102	3389672.395
461	16383	24.9785995	309007.1102	3389672.395
462	16384	24.9787006	309017.1102	3389672.395
463	16385	24.9787998	309027.1102	3389672.395
464	16386	24.9789009	309037.1102	3389672.395
465	16387	24.9790001	309047.1102	3389672.395
466	16388	24.9790993	309057.1102	3389672.395
467	16389	24.9792004	309067.1102	3389672.395
468	16390	24.9792995	309077.1102	3389672.395
469	16391	24.9794006	309087.1102	3389672.395
470	16392	24.9794998	309097.1102	3389672.395
471	16393	24.9796009	309107.1102	3389672.395
472	16394	24.9797001	309117.1102	3389672.395
473	16395	24.9797993	309127.1102	3389672.395
474	16396	24.9799004	309137.1102	3389672.395
475	16397	24.9799995	309147.1102	3389672.395
476	16398	24.9801006	309157.1102	3389672.395
477	16399	24.9801998	309167.1102	3389672.395
478	16400	24.9803009	309177.1102	3389672.395
479	16401	24.9804001	309187.1102	3389672.395
480	16402	24.9804993	309197.1102	3389672.395
481	16403	24.9806004	309207.1102	3389672.395
482	16404	24.9806995	309217.1102	3389672.395
483	16405	24.9808006	309227.1102	3389672.395
484	16406	24.9808998	309237.1102	3389672.395
485	16407	24.9808998	309247.1102	3389672.395
486	16408	24.9810009	309257.1102	3389672.395
487	16409	24.9811001	309267.1102	3389672.395
488	16410	24.9811993	309277.1102	3389672.395
489	16411	24.9813004	309287.1102	3389672.395
490	16412	24.9813995	309297.1102	3389672.395
491	16413	24.9815006	309307.1102	3389672.395
492	16414	24.9815998	309317.1102	3389672.395
493	16415	24.9817009	309327.1102	3389672.395
494	16416	24.9818001	309337.1102	3389672.395
495	16417	24.9818993	309347.1102	3389672.395
496	16418	24.9820004	309357.1102	3389672.395
497	16419	24.9820995	309367.1102	3389672.395
498	16420	24.9822006	309377.1102	3389672.395
499	16421	24.9822998	309387.1102	3389672.395
500	16422	24.9824009	309397.1102	3389672.395
501	16423	24.9825001	309407.1102	3389672.395
502	16424	24.9825993	309417.1102	3389672.395
503	16425	24.9827003	309427.1102	3389672.395
504	16426	24.9827995	309437.1102	3389672.395
505	16427	24.9829006	309447.1102	3389672.395
506	16428	24.9829998	309457.1102	3389672.395
507	16429	24.9831009	309467.1102	3389672.395
508	16430	24.9832001	309477.1102	3389672.395
509	16431	24.9832993	309487.1102	3389672.395
510	16432	24.9834003	309497.1102	3389672.395
511	16433	24.9834995	309507.1102	3389672.395
512	16434	24.9836006	309517.1102	3389672.395
513	16435	24.9836998	309527.1102	3389672.395
514	16436	24.9838009	309537.1102	3389672.395
515	16437	24.9839001	309547.1102	3389672.395
516	16438	24.9839993	309557.1102	3389672.395
517	16439	24.9841003	309567.1102	3389672.395
518	16440	24.9841995	309577.1102	3389672.395
519	16441	24.9843006	309587.1102	3389672.395
520	16442	24.9843998	309597.1102	3389672.395
521	16443	24.9845009	309607.1102	3389672.395
522	16444	24.9846001	309617.1102	3389672.395
523	16445	24.9846992	309627.1102	3389672.395
524	16446	24.9848003	309637.1102	3389672.395
525	16447	24.9848995	309647.1102	3389672.395
526	16448	24.9850006	309657.1102	3389672.395
527	16449	24.9850998	309667.1102	3389672.395
528	16450	24.9852009	309677.1102	3389672.395
529	16451	24.9853001	309687.1102	3389672.395
530	16452	24.9853992	309697.1102	3389672.395
531	16453	24.9855003	309707.1102	3389672.395
532	16454	24.9855003	309717.1102	3389672.395
533	19546	24.9724007	308687.1102	3389662.395
534	19547	24.9724998	308697.1102	3389662.395
535	19548	24.9726009	308707.1102	3389662.395
536	19549	24.9727001	308717.1102	3389662.395
537	19550	24.9727993	308727.1102	3389662.395
538	19551	24.9729004	308737.1102	3389662.395
539	19552	24.9729996	308747.1102	3389662.395
540	19553	24.9731007	308757.1102	3389662.395
541	19554	24.9731998	308767.1102	3389662.395
542	19555	24.9733009	308777.1102	3389662.395
543	19556	24.9734001	308787.1102	3389662.395
544	19557	24.9734993	308797.1102	3389662.395
545	19558	24.9736004	308807.1102	3389662.395
546	19559	24.9736996	308817.1102	3389662.395
547	19560	24.9738007	308827.1102	3389662.395
548	19561	24.9738998	308837.1102	3389662.395
549	19562	24.9740009	308847.1102	3389662.395
550	19563	24.9741001	308857.1102	3389662.395
551	19564	24.9741993	308867.1102	3389662.395
552	19565	24.9743004	308877.1102	3389662.395
553	19566	24.9743996	308887.1102	3389662.395
554	19567	24.9745007	308897.1102	3389662.395
555	19568	24.9745998	308907.1102	3389662.395
556	19569	24.9747009	308917.1102	3389662.395
557	19570	24.9748001	308927.1102	3389662.395
558	19571	24.9748993	308937.1102	3389662.395
559	19572	24.9750004	308947.1102	3389662.395
560	19573	24.9750996	308957.1102	3389662.395
561	19574	24.9752007	308967.1102	3389662.395
562	19575	24.9752998	308977.1102	3389662.395
563	19576	24.9754009	308987.1102	3389662.395
564	19577	24.9755001	308997.1102	3389662.395
565	19578	24.9755993	309007.1102	3389662.395
566	19579	24.9757004	309017.1102	3389662.395
567	19580	24.9757996	309027.1102	3389662.395
568	19581	24.9759007	309037.1102	3389662.395
569	19582	24.9759998	309047.1102	3389662.395
570	19583	24.9761009	309057.1102	3389662.395
571	19584	24.9762001	309067.1102	3389662.395
572	19585	24.9762001	309077.1102	3389662.395
573	19586	24.9762993	309087.1102	3389662.395
574	19587	24.9764004	309097.1102	3389662.395
575	19588	24.9764996	309107.1102	3389662.395
576	19589	24.9766006	309117.1102	3389662.395
577	19590	24.9766998	309127.1102	3389662.395
578	19591	24.9768009	309137.1102	3389662.395
579	19592	24.9769001	309147.1102	3389662.395
580	19593	24.9769993	309157.1102	3389662.395
581	19594	24.9771004	309167.1102	3389662.395
582	19595	24.9771996	309177.1102	3389662.395
583	19596	24.9773006	309187.1102	3389662.395
584	19597	24.9773998	309197.1102	3389662.395
585	19598	24.9775009	309207.1102	3389662.395
586	19599	24.9776001	309217.1102	3389662.395
587	19600	24.9776993	309227.1102	3389662.395
588	19601	24.9778004	309237.1102	3389662.395
589	19602	24.9778996	309247.1102	3389662.395
590	19603	24.9780006	309257.1102	3389662.395
591	19604	24.9780998	309267.1102	3389662.395
592	19605	24.9782009	309277.1102	3389662.395
593	19606	24.9783001	309287.1102	3389662.395
594	19607	24.9783993	309297.1102	3389662.395
595	19608	24.9785004	309307.1102	3389662.395
596	19609	24.9785995	309317.1102	3389662.395
597	19610	24.9787006	309327.1102	3389662.395
598	19611	24.9787998	309337.1102	3389662.395
599	19612	24.9789009	309347.1102	3389662.395
600	19613	24.9790001	309357.1102	3389662.395
601	19614	24.9790993	309367.1102	3389662.395
602	19615	24.9792004	309377.1102	3389662.395
603	19616	24.9792995	309387.1102	3389662.395
604	19617	24.9794006	309397.1102	3389662.395
605	19618	24.9794998	309407.1102	3389662.395
606	19619	24.9796009	309417.1102	3389662.395
607	19620	24.9797001	309427.1102	3389662.395
608	19621	24.9797993	309437.1102	3389662.395
609	19622	24.9799004	309447.1102	3389662.395
610	19623	24.9799995	309457.1102	3389662.395
611	19624	24.9801006	309467.1102	3389662.395
612	19625	24.9801998	309477.1102	3389662.395
613	19626	24.9803009	309487.1102	3389662.395
614	19627	24.9804001	309497.1102	3389662.395
615	19628	24.9804993	309507.1102	3389662.395
616	19629	24.9806004	309517.1102	3389662.395
617	19630	24.9806995	309527.1102	3389662.395
618	19631	24.9808006	309537.1102	3389662.395
619	19632	24.9808998	309547.1102	3389662.395
620	19633	24.9808998	309557.1102	3389662.395
621	19634	24.9810009	309567.1102	3389662.395
622	19635	24.9811001	309577.1102	3389662.395
623	19636	24.9811993	309587.1102	3389662.395
624	19637	24.9813004	309597.1102	3389662.395
625	19638	24.9813995	309607.1102	3389662.395
626	19639	24.9815006	309617.1102	3389662.395
627	19640	24.9815998	309627.1102	3389662.395
628	19641	24.9817009	309637.1102	3389662.395
629	19642	24.9818001	309647.1102	3389662.395
630	19643	24.9818993	309657.1102	3389662.395
631	19644	24.9820004	309667.1102	3389662.395
632	19645	24.9820995	309677.1102	3389662.395
633	19646	24.9822006	309687.1102	3389662.395
634	19647	24.9822998	309697.1102	3389662.395
635	19648	24.9824009	309707.1102	3389662.395
636	19649	24.9825001	309717.1102	3389662.395
637	22741	24.9694004	308687.1102	3389652.395
638	22742	24.9694996	308697.1102	3389652.395
639	22743	24.9696007	308707.1102	3389652.395
640	22744	24.9696999	308717.1102	3389652.395
641	22745	24.9698009	308727.1102	3389652.395
642	22746	24.9699001	308737.1102	3389652.395
643	22747	24.9699993	308747.1102	3389652.395
644	22748	24.9701004	308757.1102	3389652.395
645	22749	24.9701996	308767.1102	3389652.395
646	22750	24.9703007	308777.1102	3389652.395
647	22751	24.9703999	308787.1102	3389652.395
648	22752	24.9705009	308797.1102	3389652.395
649	22753	24.9706001	308807.1102	3389652.395
650	22754	24.9706993	308817.1102	3389652.395
651	22755	24.9708004	308827.1102	3389652.395
652	22756	24.9708996	308837.1102	3389652.395
653	22757	24.9710007	308847.1102	3389652.395
654	22758	24.9710999	308857.1102	3389652.395
655	22759	24.9712009	308867.1102	3389652.395
656	22760	24.9713001	308877.1102	3389652.395
657	22761	24.9713993	308887.1102	3389652.395
658	22762	24.9715004	308897.1102	3389652.395
659	22763	24.9715996	308907.1102	3389652.395
660	22764	24.9715996	308917.1102	3389652.395
661	22765	24.9717007	308927.1102	3389652.395
662	22766	24.9717999	308937.1102	3389652.395
663	22767	24.9719009	308947.1102	3389652.395
664	22768	24.9720001	308957.1102	3389652.395
665	22769	24.9720993	308967.1102	3389652.395
666	22770	24.9722004	308977.1102	3389652.395
667	22771	24.9722996	308987.1102	3389652.395
668	22772	24.9724007	308997.1102	3389652.395
669	22773	24.9724998	309007.1102	3389652.395
670	22774	24.9726009	309017.1102	3389652.395
671	22775	24.9727001	309027.1102	3389652.395
672	22776	24.9727993	309037.1102	3389652.395
673	22777	24.9729004	309047.1102	3389652.395
674	22778	24.9729996	309057.1102	3389652.395
675	22779	24.9731007	309067.1102	3389652.395
676	22780	24.9731998	309077.1102	3389652.395
677	22781	24.9733009	309087.1102	3389652.395
678	22782	24.9734001	309097.1102	3389652.395
679	22783	24.9734993	309107.1102	3389652.395
680	22784	24.9736004	309117.1102	3389652.395
681	22785	24.9736996	309127.1102	3389652.395
682	22786	24.9738007	309137.1102	3389652.395
683	22787	24.9738998	309147.1102	3389652.395
684	22788	24.9740009	309157.1102	3389652.395
685	22789	24.9741001	309167.1102	3389652.395
686	22790	24.9741993	309177.1102	3389652.395
687	22791	24.9743004	309187.1102	3389652.395
688	22792	24.9743996	309197.1102	3389652.395
689	22793	24.9745007	309207.1102	3389652.395
690	22794	24.9745998	309217.1102	3389652.395
691	22795	24.9747009	309227.1102	3389652.395
692	22796	24.9748001	309237.1102	3389652.395
693	22797	24.9748993	309247.1102	3389652.395
694	22798	24.9750004	309257.1102	3389652.395
695	22799	24.9750996	309267.1102	3389652.395
696	22800	24.9752007	309277.1102	3389652.395
697	22801	24.9752998	309287.1102	3389652.395
698	22802	24.9754009	309297.1102	3389652.395
699	22803	24.9755001	309307.1102	3389652.395
700	22804	24.9755993	309317.1102	3389652.395
701	22805	24.9757004	309327.1102	3389652.395
702	22806	24.9757996	309337.1102	3389652.395
703	22807	24.9759007	309347.1102	3389652.395
704	22808	24.9759998	309357.1102	3389652.395
705	22809	24.9761009	309367.1102	3389652.395
706	22810	24.9762001	309377.1102	3389652.395
707	22811	24.9762993	309387.1102	3389652.395
708	22812	24.9762993	309397.1102	3389652.395
709	22813	24.9764004	309407.1102	3389652.395
710	22814	24.9764996	309417.1102	3389652.395
711	22815	24.9766006	309427.1102	3389652.395
712	22816	24.9766998	309437.1102	3389652.395
713	22817	24.9768009	309447.1102	3389652.395
714	22818	24.9769001	309457.1102	3389652.395
715	22819	24.9769993	309467.1102	3389652.395
716	22820	24.9771004	309477.1102	3389652.395
717	22821	24.9771996	309487.1102	3389652.395
718	22822	24.9773006	309497.1102	3389652.395
719	22823	24.9773998	309507.1102	3389652.395
720	22824	24.9775009	309517.1102	3389652.395
721	22825	24.9776001	309527.1102	3389652.395
722	22826	24.9776993	309537.1102	3389652.395
723	22827	24.9778004	309547.1102	3389652.395
724	22828	24.9778996	309557.1102	3389652.395
725	22829	24.9780006	309567.1102	3389652.395
726	22830	24.9780998	309577.1102	3389652.395
727	22831	24.9782009	309587.1102	3389652.395
728	22832	24.9783001	309597.1102	3389652.395
729	22833	24.9783993	309607.1102	3389652.395
730	22834	24.9785004	309617.1102	3389652.395
731	22835	24.9785995	309627.1102	3389652.395
732	22836	24.9787006	309637.1102	3389652.395
733	22837	24.9787998	309647.1102	3389652.395
734	22838	24.9789009	309657.1102	3389652.395
735	22839	24.9790001	309667.1102	3389652.395
736	22840	24.9790993	309677.1102	3389652.395
737	22841	24.9792004	309687.1102	3389652.395
738	22842	24.9792995	309697.1102	3389652.395
739	22843	24.9794006	309707.1102	3389652.395
740	25936	24.9664001	308687.1102	3389642.395
741	25937	24.9664993	308697.1102	3389642.395
742	25938	24.9666004	308707.1102	3389642.395
743	25939	24.9666996	308717.1102	3389642.395
744	25940	24.9668007	308727.1102	3389642.395
745	25941	24.9668999	308737.1102	3389642.395
746	25942	24.9669991	308747.1102	3389642.395
747	25943	24.9671001	308757.1102	3389642.395
748	25944	24.9671001	308767.1102	3389642.395
749	25945	24.9671993	308777.1102	3389642.395
750	25946	24.9673004	308787.1102	3389642.395
751	25947	24.9673996	308797.1102	3389642.395
752	25948	24.9675007	308807.1102	3389642.395
753	25949	24.9675999	308817.1102	3389642.395
754	25950	24.9676991	308827.1102	3389642.395
755	25951	24.9678001	308837.1102	3389642.395
756	25952	24.9678993	308847.1102	3389642.395
757	25953	24.9680004	308857.1102	3389642.395
758	25954	24.9680996	308867.1102	3389642.395
759	25955	24.9682007	308877.1102	3389642.395
760	25956	24.9682999	308887.1102	3389642.395
761	25957	24.968399	308897.1102	3389642.395
762	25958	24.9685001	308907.1102	3389642.395
763	25959	24.9685993	308917.1102	3389642.395
764	25960	24.9687004	308927.1102	3389642.395
765	25961	24.9687996	308937.1102	3389642.395
766	25962	24.9689007	308947.1102	3389642.395
767	25963	24.9689999	308957.1102	3389642.395
768	25964	24.969101	308967.1102	3389642.395
769	25965	24.9692001	308977.1102	3389642.395
770	25966	24.9692993	308987.1102	3389642.395
771	25967	24.9694004	308997.1102	3389642.395
772	25968	24.9694996	309007.1102	3389642.395
773	25969	24.9696007	309017.1102	3389642.395
774	25970	24.9696999	309027.1102	3389642.395
775	25971	24.9698009	309037.1102	3389642.395
776	25972	24.9699001	309047.1102	3389642.395
777	25973	24.9699993	309057.1102	3389642.395
778	25974	24.9701004	309067.1102	3389642.395
779	25975	24.9701996	309077.1102	3389642.395
780	25976	24.9703007	309087.1102	3389642.395
781	25977	24.9703999	309097.1102	3389642.395
782	25978	24.9705009	309107.1102	3389642.395
783	25979	24.9706001	309117.1102	3389642.395
784	25980	24.9706993	309127.1102	3389642.395
785	25981	24.9708004	309137.1102	3389642.395
786	25982	24.9708996	309147.1102	3389642.395
787	25983	24.9710007	309157.1102	3389642.395
788	25984	24.9710999	309167.1102	3389642.395
789	25985	24.9712009	309177.1102	3389642.395
790	25986	24.9713001	309187.1102	3389642.395
791	25987	24.9713993	309197.1102	3389642.395
792	25988	24.9715004	309207.1102	3389642.395
793	25989	24.9715996	309217.1102	3389642.395
794	25990	24.9717007	309227.1102	3389642.395
795	25991	24.9717999	309237.1102	3389642.395
796	25992	24.9717999	309247.1102	3389642.395
797	25993	24.9719009	309257.1102	3389642.395
798	25994	24.9720001	309267.1102	3389642.395
799	25995	24.9720993	309277.1102	3389642.395
800	25996	24.9722004	309287.1102	3389642.395
801	25997	24.9722996	309297.1102	3389642.395
802	25998	24.9724007	309307.1102	3389642.395
803	25999	24.9724998	309317.1102	3389642.395
804	26000	24.9726009	309327.1102	3389642.395
805	26001	24.9727001	309337.1102	3389642.395
806	26002	24.9727993	309347.1102	3389642.395
807	26003	24.9729004	309357.1102	3389642.395
808	26004	24.9729996	309367.1102	3389642.395
809	26005	24.9731007	309377.1102	3389642.395
810	26006	24.9731998	309387.1102	3389642.395
811	26007	24.9733009	309397.1102	3389642.395
812	26008	24.9734001	309407.1102	3389642.395
813	26009	24.9734993	309417.1102	3389642.395
814	26010	24.9736004	309427.1102	3389642.395
815	26011	24.9736996	309437.1102	3389642.395
816	26012	24.9738007	309447.1102	3389642.395
817	26013	24.9738998	309457.1102	3389642.395
818	26014	24.9740009	309467.1102	3389642.395
819	26015	24.9741001	309477.1102	3389642.395
820	26016	24.9741993	309487.1102	3389642.395
821	26017	24.9743004	309497.1102	3389642.395
822	26018	24.9743996	309507.1102	3389642.395
823	26019	24.9745007	309517.1102	3389642.395
824	26020	24.9745998	309527.1102	3389642.395
825	26021	24.9747009	309537.1102	3389642.395
826	26022	24.9748001	309547.1102	3389642.395
827	26023	24.9748993	309557.1102	3389642.395
828	26024	24.9750004	309567.1102	3389642.395
829	26025	24.9750996	309577.1102	3389642.395
830	26026	24.9752007	309587.1102	3389642.395
831	26027	24.9752998	309597.1102	3389642.395
832	26028	24.9754009	309607.1102	3389642.395
833	26029	24.9755001	309617.1102	3389642.395
834	26030	24.9755993	309627.1102	3389642.395
835	26031	24.9757004	309637.1102	3389642.395
836	26032	24.9757996	309647.1102	3389642.395
837	26033	24.9759007	309657.1102	3389642.395
838	26034	24.9759998	309667.1102	3389642.395
839	26035	24.9761009	309677.1102	3389642.395
840	26036	24.9762001	309687.1102	3389642.395
841	26037	24.9762993	309697.1102	3389642.395
842	29131	24.9633007	308687.1102	3389632.395
843	29132	24.9633999	308697.1102	3389632.395
844	29133	24.9634991	308707.1102	3389632.395
845	29134	24.9636002	308717.1102	3389632.395
846	29135	24.9636993	308727.1102	3389632.395
847	29136	24.9638004	308737.1102	3389632.395
848	29137	24.9638996	308747.1102	3389632.395
849	29138	24.9640007	308757.1102	3389632.395
850	29139	24.9640999	308767.1102	3389632.395
851	29140	24.9641991	308777.1102	3389632.395
852	29141	24.9643002	308787.1102	3389632.395
853	29142	24.9643993	308797.1102	3389632.395
854	29143	24.9645004	308807.1102	3389632.395
855	29144	24.9645996	308817.1102	3389632.395
856	29145	24.9647007	308827.1102	3389632.395
857	29146	24.9647999	308837.1102	3389632.395
858	29147	24.9648991	308847.1102	3389632.395
859	29148	24.9650002	308857.1102	3389632.395
860	29149	24.9650993	308867.1102	3389632.395
861	29150	24.9652004	308877.1102	3389632.395
862	29151	24.9652996	308887.1102	3389632.395
863	29152	24.9654007	308897.1102	3389632.395
864	29153	24.9654999	308907.1102	3389632.395
865	29154	24.9655991	308917.1102	3389632.395
866	29155	24.9657001	308927.1102	3389632.395
867	29156	24.9657993	308937.1102	3389632.395
868	29157	24.9659004	308947.1102	3389632.395
869	29158	24.9659996	308957.1102	3389632.395
870	29159	24.9661007	308967.1102	3389632.395
871	29160	24.9661999	308977.1102	3389632.395
872	29161	24.9662991	308987.1102	3389632.395
873	29162	24.9664001	308997.1102	3389632.395
874	29163	24.9664993	309007.1102	3389632.395
875	29164	24.9666004	309017.1102	3389632.395
876	29165	24.9666996	309027.1102	3389632.395
877	29166	24.9668007	309037.1102	3389632.395
878	29167	24.9668999	309047.1102	3389632.395
879	29168	24.9669991	309057.1102	3389632.395
880	29169	24.9671001	309067.1102	3389632.395
881	29170	24.9671001	309077.1102	3389632.395
882	29171	24.9671993	309087.1102	3389632.395
883	29172	24.9673004	309097.1102	3389632.395
884	29173	24.9673996	309107.1102	3389632.395
885	29174	24.9675007	309117.1102	3389632.395
886	29175	24.9675999	309127.1102	3389632.395
887	29176	24.9676991	309137.1102	3389632.395
888	29177	24.9678001	309147.1102	3389632.395
889	29178	24.9678993	309157.1102	3389632.395
890	29179	24.9680004	309167.1102	3389632.395
891	29180	24.9680996	309177.1102	3389632.395
892	29181	24.9682007	309187.1102	3389632.395
893	29182	24.9682999	309197.1102	3389632.395
894	29183	24.968399	309207.1102	3389632.395
895	29184	24.9685001	309217.1102	3389632.395
896	29185	24.9685993	309227.1102	3389632.395
897	29186	24.9687004	309237.1102	3389632.395
898	29187	24.9687996	309247.1102	3389632.395
899	29188	24.9689007	309257.1102	3389632.395
900	29189	24.9689999	309267.1102	3389632.395
901	29190	24.969101	309277.1102	3389632.395
902	29191	24.9692001	309287.1102	3389632.395
903	29192	24.9692993	309297.1102	3389632.395
904	29193	24.9694004	309307.1102	3389632.395
905	29194	24.9694996	309317.1102	3389632.395
906	29195	24.9696007	309327.1102	3389632.395
907	29196	24.9696999	309337.1102	3389632.395
908	29197	24.9698009	309347.1102	3389632.395
909	29198	24.9699001	309357.1102	3389632.395
910	29199	24.9699993	309367.1102	3389632.395
911	29200	24.9701004	309377.1102	3389632.395
912	29201	24.9701996	309387.1102	3389632.395
913	29202	24.9703007	309397.1102	3389632.395
914	29203	24.9703999	309407.1102	3389632.395
915	29204	24.9705009	309417.1102	3389632.395
916	29205	24.9706001	309427.1102	3389632.395
917	29206	24.9706993	309437.1102	3389632.395
918	29207	24.9708004	309447.1102	3389632.395
919	29208	24.9708996	309457.1102	3389632.395
920	29209	24.9710007	309467.1102	3389632.395
921	29210	24.9710999	309477.1102	3389632.395
922	29211	24.9712009	309487.1102	3389632.395
923	29212	24.9713001	309497.1102	3389632.395
924	29213	24.9713993	309507.1102	3389632.395
925	29214	24.9715004	309517.1102	3389632.395
926	29215	24.9715996	309527.1102	3389632.395
927	29216	24.9717007	309537.1102	3389632.395
928	29217	24.9717999	309547.1102	3389632.395
929	29218	24.9717999	309557.1102	3389632.395
930	29219	24.9719009	309567.1102	3389632.395
931	29220	24.9720001	309577.1102	3389632.395
932	29221	24.9720993	309587.1102	3389632.395
933	29222	24.9722004	309597.1102	3389632.395
934	29223	24.9722996	309607.1102	3389632.395
935	29224	24.9724007	309617.1102	3389632.395
936	29225	24.9724998	309627.1102	3389632.395
937	29226	24.9726009	309637.1102	3389632.395
938	29227	24.9727001	309647.1102	3389632.395
939	29228	24.9727993	309657.1102	3389632.395
940	29229	24.9729004	309667.1102	3389632.395
941	29230	24.9729996	309677.1102	3389632.395
942	29231	24.9731007	309687.1102	3389632.395
943	32326	24.9603004	308687.1102	3389622.395
944	32327	24.9603996	308697.1102	3389622.395
945	32328	24.9605007	308707.1102	3389622.395
946	32329	24.9605999	308717.1102	3389622.395
947	32330	24.9606991	308727.1102	3389622.395
948	32331	24.9608002	308737.1102	3389622.395
949	32332	24.9608994	308747.1102	3389622.395
950	32333	24.9610004	308757.1102	3389622.395
951	32334	24.9610996	308767.1102	3389622.395
952	32335	24.9612007	308777.1102	3389622.395
953	32336	24.9612999	308787.1102	3389622.395
954	32337	24.9613991	308797.1102	3389622.395
955	32338	24.9615002	308807.1102	3389622.395
956	32339	24.9615993	308817.1102	3389622.395
957	32340	24.9617004	308827.1102	3389622.395
958	32341	24.9617996	308837.1102	3389622.395
959	32342	24.9619007	308847.1102	3389622.395
960	32343	24.9619999	308857.1102	3389622.395
961	32344	24.9620991	308867.1102	3389622.395
962	32345	24.9622002	308877.1102	3389622.395
963	32346	24.9622993	308887.1102	3389622.395
964	32347	24.9624004	308897.1102	3389622.395
965	32348	24.9624996	308907.1102	3389622.395
966	32349	24.9624996	308917.1102	3389622.395
967	32350	24.9626007	308927.1102	3389622.395
968	32351	24.9626999	308937.1102	3389622.395
969	32352	24.9627991	308947.1102	3389622.395
970	32353	24.9629002	308957.1102	3389622.395
971	32354	24.9629993	308967.1102	3389622.395
972	32355	24.9631004	308977.1102	3389622.395
973	32356	24.9631996	308987.1102	3389622.395
974	32357	24.9633007	308997.1102	3389622.395
975	32358	24.9633999	309007.1102	3389622.395
976	32359	24.9634991	309017.1102	3389622.395
977	32360	24.9636002	309027.1102	3389622.395
978	32361	24.9636993	309037.1102	3389622.395
979	32362	24.9638004	309047.1102	3389622.395
980	32363	24.9638996	309057.1102	3389622.395
981	32364	24.9640007	309067.1102	3389622.395
982	32365	24.9640999	309077.1102	3389622.395
983	32366	24.9641991	309087.1102	3389622.395
984	32367	24.9643002	309097.1102	3389622.395
985	32368	24.9643993	309107.1102	3389622.395
986	32369	24.9645004	309117.1102	3389622.395
987	32370	24.9645996	309127.1102	3389622.395
988	32371	24.9647007	309137.1102	3389622.395
989	32372	24.9647999	309147.1102	3389622.395
990	32373	24.9648991	309157.1102	3389622.395
991	32374	24.9650002	309167.1102	3389622.395
992	32375	24.9650993	309177.1102	3389622.395
993	32376	24.9652004	309187.1102	3389622.395
994	32377	24.9652996	309197.1102	3389622.395
995	32378	24.9654007	309207.1102	3389622.395
996	32379	24.9654999	309217.1102	3389622.395
997	32380	24.9655991	309227.1102	3389622.395
998	32381	24.9657001	309237.1102	3389622.395
999	32382	24.9657993	309247.1102	3389622.395
1000	32383	24.9659004	309257.1102	3389622.395
1001	32384	24.9659996	309267.1102	3389622.395
1002	32385	24.9661007	309277.1102	3389622.395
1003	32386	24.9661999	309287.1102	3389622.395
1004	32387	24.9662991	309297.1102	3389622.395
1005	32388	24.9664001	309307.1102	3389622.395
1006	32389	24.9664993	309317.1102	3389622.395
1007	32390	24.9666004	309327.1102	3389622.395
1008	32391	24.9666996	309337.1102	3389622.395
1009	32392	24.9668007	309347.1102	3389622.395
1010	32393	24.9668999	309357.1102	3389622.395
1011	32394	24.9669991	309367.1102	3389622.395
1012	32395	24.9671001	309377.1102	3389622.395
1013	32396	24.9671993	309387.1102	3389622.395
1014	32397	24.9671993	309397.1102	3389622.395
1015	32398	24.9673004	309407.1102	3389622.395
1016	32399	24.9673996	309417.1102	3389622.395
1017	32400	24.9675007	309427.1102	3389622.395
1018	32401	24.9675999	309437.1102	3389622.395
1019	32402	24.9676991	309447.1102	3389622.395
1020	32403	24.9678001	309457.1102	3389622.395
1021	32404	24.9678993	309467.1102	3389622.395
1022	32405	24.9680004	309477.1102	3389622.395
1023	32406	24.9680996	309487.1102	3389622.395
1024	32407	24.9682007	309497.1102	3389622.395
1025	32408	24.9682999	309507.1102	3389622.395
1026	32409	24.968399	309517.1102	3389622.395
1027	32410	24.9685001	309527.1102	3389622.395
1028	32411	24.9685993	309537.1102	3389622.395
1029	32412	24.9687004	309547.1102	3389622.395
1030	32413	24.9687996	309557.1102	3389622.395
1031	32414	24.9689007	309567.1102	3389622.395
1032	32415	24.9689999	309577.1102	3389622.395
1033	32416	24.969101	309587.1102	3389622.395
1034	32417	24.9692001	309597.1102	3389622.395
1035	32418	24.9692993	309607.1102	3389622.395
1036	32419	24.9694004	309617.1102	3389622.395
1037	32420	24.9694996	309627.1102	3389622.395
1038	32421	24.9696007	309637.1102	3389622.395
1039	32422	24.9696999	309647.1102	3389622.395
1040	32423	24.9698009	309657.1102	3389622.395
1041	32424	24.9699001	309667.1102	3389622.395
1042	32425	24.9699993	309677.1102	3389622.395
1043	35521	24.9573002	308687.1102	3389612.395
1044	35522	24.9573994	308697.1102	3389612.395
1045	35523	24.9575005	308707.1102	3389612.395
1046	35524	24.9575996	308717.1102	3389612.395
1047	35525	24.9577007	308727.1102	3389612.395
1048	35526	24.9577999	308737.1102	3389612.395
1049	35527	24.9578991	308747.1102	3389612.395
1050	35528	24.9580002	308757.1102	3389612.395
1051	35529	24.9580002	308767.1102	3389612.395
1052	35530	24.9580994	308777.1102	3389612.395
1053	35531	24.9582005	308787.1102	3389612.395
1054	35532	24.9582996	308797.1102	3389612.395
1055	35533	24.9584007	308807.1102	3389612.395
1056	35534	24.9584999	308817.1102	3389612.395
1057	35535	24.9585991	308827.1102	3389612.395
1058	35536	24.9587002	308837.1102	3389612.395
1059	35537	24.9587994	308847.1102	3389612.395
1060	35538	24.9589005	308857.1102	3389612.395
1061	35539	24.9589996	308867.1102	3389612.395
1062	35540	24.9591007	308877.1102	3389612.395
1063	35541	24.9591999	308887.1102	3389612.395
1064	35542	24.9592991	308897.1102	3389612.395
1065	35543	24.9594002	308907.1102	3389612.395
1066	35544	24.9594994	308917.1102	3389612.395
1067	35545	24.9596004	308927.1102	3389612.395
1068	35546	24.9596996	308937.1102	3389612.395
1069	35547	24.9598007	308947.1102	3389612.395
1070	35548	24.9598999	308957.1102	3389612.395
1071	35549	24.9599991	308967.1102	3389612.395
1072	35550	24.9601002	308977.1102	3389612.395
1073	35551	24.9601994	308987.1102	3389612.395
1074	35552	24.9603004	308997.1102	3389612.395
1075	35553	24.9603996	309007.1102	3389612.395
1076	35554	24.9605007	309017.1102	3389612.395
1077	35555	24.9605999	309027.1102	3389612.395
1078	35556	24.9606991	309037.1102	3389612.395
1079	35557	24.9608002	309047.1102	3389612.395
1080	35558	24.9608994	309057.1102	3389612.395
1081	35559	24.9610004	309067.1102	3389612.395
1082	35560	24.9610996	309077.1102	3389612.395
1083	35561	24.9612007	309087.1102	3389612.395
1084	35562	24.9612999	309097.1102	3389612.395
1085	35563	24.9613991	309107.1102	3389612.395
1086	35564	24.9615002	309117.1102	3389612.395
1087	35565	24.9615993	309127.1102	3389612.395
1088	35566	24.9617004	309137.1102	3389612.395
1089	35567	24.9617996	309147.1102	3389612.395
1090	35568	24.9619007	309157.1102	3389612.395
1091	35569	24.9619999	309167.1102	3389612.395
1092	35570	24.9620991	309177.1102	3389612.395
1093	35571	24.9622002	309187.1102	3389612.395
1094	35572	24.9622993	309197.1102	3389612.395
1095	35573	24.9624004	309207.1102	3389612.395
1096	35574	24.9624996	309217.1102	3389612.395
1097	35575	24.9626007	309227.1102	3389612.395
1098	35576	24.9626999	309237.1102	3389612.395
1099	35577	24.9626999	309247.1102	3389612.395
1100	35578	24.9627991	309257.1102	3389612.395
1101	35579	24.9629002	309267.1102	3389612.395
1102	35580	24.9629993	309277.1102	3389612.395
1103	35581	24.9631004	309287.1102	3389612.395
1104	35582	24.9631996	309297.1102	3389612.395
1105	35583	24.9633007	309307.1102	3389612.395
1106	35584	24.9633999	309317.1102	3389612.395
1107	35585	24.9634991	309327.1102	3389612.395
1108	35586	24.9636002	309337.1102	3389612.395
1109	35587	24.9636993	309347.1102	3389612.395
1110	35588	24.9638004	309357.1102	3389612.395
1111	35589	24.9638996	309367.1102	3389612.395
1112	35590	24.9640007	309377.1102	3389612.395
1113	35591	24.9640999	309387.1102	3389612.395
1114	35592	24.9641991	309397.1102	3389612.395
1115	35593	24.9643002	309407.1102	3389612.395
1116	35594	24.9643993	309417.1102	3389612.395
1117	35595	24.9645004	309427.1102	3389612.395
1118	35596	24.9645996	309437.1102	3389612.395
1119	35597	24.9647007	309447.1102	3389612.395
1120	35598	24.9647999	309457.1102	3389612.395
1121	35599	24.9648991	309467.1102	3389612.395
1122	35600	24.9650002	309477.1102	3389612.395
1123	35601	24.9650993	309487.1102	3389612.395
1124	35602	24.9652004	309497.1102	3389612.395
1125	35603	24.9652996	309507.1102	3389612.395
1126	35604	24.9654007	309517.1102	3389612.395
1127	35605	24.9654999	309527.1102	3389612.395
1128	35606	24.9655991	309537.1102	3389612.395
1129	35607	24.9657001	309547.1102	3389612.395
1130	35608	24.9657993	309557.1102	3389612.395
1131	35609	24.9659004	309567.1102	3389612.395
1132	35610	24.9659996	309577.1102	3389612.395
1133	35611	24.9661007	309587.1102	3389612.395
1134	35612	24.9661999	309597.1102	3389612.395
1135	35613	24.9662991	309607.1102	3389612.395
1136	35614	24.9664001	309617.1102	3389612.395
1137	35615	24.9664993	309627.1102	3389612.395
1138	35616	24.9666004	309637.1102	3389612.395
1139	35617	24.9666996	309647.1102	3389612.395
1140	35618	24.9668007	309657.1102	3389612.395
1141	35619	24.9668999	309667.1102	3389612.395
1142	38716	24.9542007	308687.1102	3389602.395
1143	38717	24.9542999	308697.1102	3389602.395
1144	38718	24.9543991	308707.1102	3389602.395
1145	38719	24.9545002	308717.1102	3389602.395
1146	38720	24.9545994	308727.1102	3389602.395
1147	38721	24.9547005	308737.1102	3389602.395
1148	38722	24.9547997	308747.1102	3389602.395
1149	38723	24.9549007	308757.1102	3389602.395
1150	38724	24.9549999	308767.1102	3389602.395
1151	38725	24.9550991	308777.1102	3389602.395
1152	38726	24.9552002	308787.1102	3389602.395
1153	38727	24.9552994	308797.1102	3389602.395
1154	38728	24.9554005	308807.1102	3389602.395
1155	38729	24.9554996	308817.1102	3389602.395
1156	38730	24.9556007	308827.1102	3389602.395
1157	38731	24.9556999	308837.1102	3389602.395
1158	38732	24.9557991	308847.1102	3389602.395
1159	38733	24.9559002	308857.1102	3389602.395
1160	38734	24.9559994	308867.1102	3389602.395
1161	38735	24.9561005	308877.1102	3389602.395
1162	38736	24.9561996	308887.1102	3389602.395
1163	38737	24.9563007	308897.1102	3389602.395
1164	38738	24.9563999	308907.1102	3389602.395
1165	38739	24.9564991	308917.1102	3389602.395
1166	38740	24.9566002	308927.1102	3389602.395
1167	38741	24.9566994	308937.1102	3389602.395
1168	38742	24.9568005	308947.1102	3389602.395
1169	38743	24.9568996	308957.1102	3389602.395
1170	38744	24.9570007	308967.1102	3389602.395
1171	38745	24.9570999	308977.1102	3389602.395
1172	38746	24.9571991	308987.1102	3389602.395
1173	38747	24.9573002	308997.1102	3389602.395
1174	38748	24.9573994	309007.1102	3389602.395
1175	38749	24.9575005	309017.1102	3389602.395
1176	38750	24.9575996	309027.1102	3389602.395
1177	38751	24.9577007	309037.1102	3389602.395
1178	38752	24.9577999	309047.1102	3389602.395
1179	38753	24.9578991	309057.1102	3389602.395
1180	38754	24.9580002	309067.1102	3389602.395
1181	38755	24.9580002	309077.1102	3389602.395
1182	38756	24.9580994	309087.1102	3389602.395
1183	38757	24.9582005	309097.1102	3389602.395
1184	38758	24.9582996	309107.1102	3389602.395
1185	38759	24.9584007	309117.1102	3389602.395
1186	38760	24.9584999	309127.1102	3389602.395
1187	38761	24.9585991	309137.1102	3389602.395
1188	38762	24.9587002	309147.1102	3389602.395
1189	38763	24.9587994	309157.1102	3389602.395
1190	38764	24.9589005	309167.1102	3389602.395
1191	38765	24.9589996	309177.1102	3389602.395
1192	38766	24.9591007	309187.1102	3389602.395
1193	38767	24.9591999	309197.1102	3389602.395
1194	38768	24.9592991	309207.1102	3389602.395
1195	38769	24.9594002	309217.1102	3389602.395
1196	38770	24.9594994	309227.1102	3389602.395
1197	38771	24.9596004	309237.1102	3389602.395
1198	38772	24.9596996	309247.1102	3389602.395
1199	38773	24.9598007	309257.1102	3389602.395
1200	38774	24.9598999	309267.1102	3389602.395
1201	38775	24.9599991	309277.1102	3389602.395
1202	38776	24.9601002	309287.1102	3389602.395
1203	38777	24.9601994	309297.1102	3389602.395
1204	38778	24.9603004	309307.1102	3389602.395
1205	38779	24.9603996	309317.1102	3389602.395
1206	38780	24.9605007	309327.1102	3389602.395
1207	38781	24.9605999	309337.1102	3389602.395
1208	38782	24.9606991	309347.1102	3389602.395
1209	38783	24.9608002	309357.1102	3389602.395
1210	38784	24.9608994	309367.1102	3389602.395
1211	38785	24.9610004	309377.1102	3389602.395
1212	38786	24.9610996	309387.1102	3389602.395
1213	38787	24.9612007	309397.1102	3389602.395
1214	38788	24.9612999	309407.1102	3389602.395
1215	38789	24.9613991	309417.1102	3389602.395
1216	38790	24.9615002	309427.1102	3389602.395
1217	38791	24.9615993	309437.1102	3389602.395
1218	38792	24.9617004	309447.1102	3389602.395
1219	38793	24.9617996	309457.1102	3389602.395
1220	38794	24.9619007	309467.1102	3389602.395
1221	38795	24.9619999	309477.1102	3389602.395
1222	38796	24.9620991	309487.1102	3389602.395
1223	38797	24.9622002	309497.1102	3389602.395
1224	38798	24.9622993	309507.1102	3389602.395
1225	38799	24.9624004	309517.1102	3389602.395
1226	38800	24.9624996	309527.1102	3389602.395
1227	38801	24.9626007	309537.1102	3389602.395
1228	38802	24.9626999	309547.1102	3389602.395
1229	38803	24.9626999	309557.1102	3389602.395
1230	38804	24.9627991	309567.1102	3389602.395
1231	38805	24.9629002	309577.1102	3389602.395
1232	38806	24.9629993	309587.1102	3389602.395
1233	38807	24.9631004	309597.1102	3389602.395
1234	38808	24.9631996	309607.1102	3389602.395
1235	38809	24.9633007	309617.1102	3389602.395
1236	38810	24.9633999	309627.1102	3389602.395
1237	38811	24.9634991	309637.1102	3389602.395
1238	38812	24.9636002	309647.1102	3389602.395
1239	41911	24.9512005	308687.1102	3389592.395
1240	41912	24.9512997	308697.1102	3389592.395
1241	41913	24.9514008	308707.1102	3389592.395
1242	41914	24.9514999	308717.1102	3389592.395
1243	41915	24.9515991	308727.1102	3389592.395
1244	41916	24.9517002	308737.1102	3389592.395
1245	41917	24.9517994	308747.1102	3389592.395
1246	41918	24.9519005	308757.1102	3389592.395
1247	41919	24.9519997	308767.1102	3389592.395
1248	41920	24.9521008	308777.1102	3389592.395
1249	41921	24.9521999	308787.1102	3389592.395
1250	41922	24.9522991	308797.1102	3389592.395
1251	41923	24.9524002	308807.1102	3389592.395
1252	41924	24.9524994	308817.1102	3389592.395
1253	41925	24.9526005	308827.1102	3389592.395
1254	41926	24.9526997	308837.1102	3389592.395
1255	41927	24.9528008	308847.1102	3389592.395
1256	41928	24.9528999	308857.1102	3389592.395
1257	41929	24.9529991	308867.1102	3389592.395
1258	41930	24.9531002	308877.1102	3389592.395
1259	41931	24.9531994	308887.1102	3389592.395
1260	41932	24.9533005	308897.1102	3389592.395
1261	41933	24.9533997	308907.1102	3389592.395
1262	41934	24.9533997	308917.1102	3389592.395
1263	41935	24.9535007	308927.1102	3389592.395
1264	41936	24.9535999	308937.1102	3389592.395
1265	41937	24.9536991	308947.1102	3389592.395
1266	41938	24.9538002	308957.1102	3389592.395
1267	41939	24.9538994	308967.1102	3389592.395
1268	41940	24.9540005	308977.1102	3389592.395
1269	41941	24.9540997	308987.1102	3389592.395
1270	41942	24.9542007	308997.1102	3389592.395
1271	41943	24.9542999	309007.1102	3389592.395
1272	41944	24.9543991	309017.1102	3389592.395
1273	41945	24.9545002	309027.1102	3389592.395
1274	41946	24.9545994	309037.1102	3389592.395
1275	41947	24.9547005	309047.1102	3389592.395
1276	41948	24.9547997	309057.1102	3389592.395
1277	41949	24.9549007	309067.1102	3389592.395
1278	41950	24.9549999	309077.1102	3389592.395
1279	41951	24.9550991	309087.1102	3389592.395
1280	41952	24.9552002	309097.1102	3389592.395
1281	41953	24.9552994	309107.1102	3389592.395
1282	41954	24.9554005	309117.1102	3389592.395
1283	41955	24.9554996	309127.1102	3389592.395
1284	41956	24.9556007	309137.1102	3389592.395
1285	41957	24.9556999	309147.1102	3389592.395
1286	41958	24.9557991	309157.1102	3389592.395
1287	41959	24.9559002	309167.1102	3389592.395
1288	41960	24.9559994	309177.1102	3389592.395
1289	41961	24.9561005	309187.1102	3389592.395
1290	41962	24.9561996	309197.1102	3389592.395
1291	41963	24.9563007	309207.1102	3389592.395
1292	41964	24.9563999	309217.1102	3389592.395
1293	41965	24.9564991	309227.1102	3389592.395
1294	41966	24.9566002	309237.1102	3389592.395
1295	41967	24.9566994	309247.1102	3389592.395
1296	41968	24.9568005	309257.1102	3389592.395
1297	41969	24.9568996	309267.1102	3389592.395
1298	41970	24.9570007	309277.1102	3389592.395
1299	41971	24.9570999	309287.1102	3389592.395
1300	41972	24.9571991	309297.1102	3389592.395
1301	41973	24.9573002	309307.1102	3389592.395
1302	41974	24.9573994	309317.1102	3389592.395
1303	41975	24.9575005	309327.1102	3389592.395
1304	41976	24.9575996	309337.1102	3389592.395
1305	41977	24.9577007	309347.1102	3389592.395
1306	41978	24.9577999	309357.1102	3389592.395
1307	41979	24.9578991	309367.1102	3389592.395
1308	41980	24.9580002	309377.1102	3389592.395
1309	41981	24.9580994	309387.1102	3389592.395
1310	41982	24.9580994	309397.1102	3389592.395
1311	41983	24.9582005	309407.1102	3389592.395
1312	41984	24.9582996	309417.1102	3389592.395
1313	41985	24.9584007	309427.1102	3389592.395
1314	41986	24.9584999	309437.1102	3389592.395
1315	41987	24.9585991	309447.1102	3389592.395
1316	41988	24.9587002	309457.1102	3389592.395
1317	41989	24.9587994	309467.1102	3389592.395
1318	41990	24.9589005	309477.1102	3389592.395
1319	41991	24.9589996	309487.1102	3389592.395
1320	41992	24.9591007	309497.1102	3389592.395
1321	41993	24.9591999	309507.1102	3389592.395
1322	41994	24.9592991	309517.1102	3389592.395
1323	41995	24.9594002	309527.1102	3389592.395
1324	41996	24.9594994	309537.1102	3389592.395
1325	41997	24.9596004	309547.1102	3389592.395
1326	41998	24.9596996	309557.1102	3389592.395
1327	41999	24.9598007	309567.1102	3389592.395
1328	42000	24.9598999	309577.1102	3389592.395
1329	42001	24.9599991	309587.1102	3389592.395
1330	42002	24.9601002	309597.1102	3389592.395
1331	42003	24.9601994	309607.1102	3389592.395
1332	42004	24.9603004	309617.1102	3389592.395
1333	42005	24.9603996	309627.1102	3389592.395
1334	42006	24.9605007	309637.1102	3389592.395
1335	42007	24.9605999	309647.1102	3389592.395
1336	45106	24.9482002	308687.1102	3389582.395
1337	45107	24.9482994	308697.1102	3389582.395
1338	45108	24.9484005	308707.1102	3389582.395
1339	45109	24.9484997	308717.1102	3389582.395
1340	45110	24.9486008	308727.1102	3389582.395
1341	45111	24.9487	308737.1102	3389582.395
1342	45112	24.9487991	308747.1102	3389582.395
1343	45113	24.9489002	308757.1102	3389582.395
1344	45114	24.9489002	308767.1102	3389582.395
1345	45115	24.9489994	308777.1102	3389582.395
1346	45116	24.9491005	308787.1102	3389582.395
1347	45117	24.9491997	308797.1102	3389582.395
1348	45118	24.9493008	308807.1102	3389582.395
1349	45119	24.9493999	308817.1102	3389582.395
1350	45120	24.9494991	308827.1102	3389582.395
1351	45121	24.9496002	308837.1102	3389582.395
1352	45122	24.9496994	308847.1102	3389582.395
1353	45123	24.9498005	308857.1102	3389582.395
1354	45124	24.9498997	308867.1102	3389582.395
1355	45125	24.9500008	308877.1102	3389582.395
1356	45126	24.9500999	308887.1102	3389582.395
1357	45127	24.9501991	308897.1102	3389582.395
1358	45128	24.9503002	308907.1102	3389582.395
1359	45129	24.9503994	308917.1102	3389582.395
1360	45130	24.9505005	308927.1102	3389582.395
1361	45131	24.9505997	308937.1102	3389582.395
1362	45132	24.9507008	308947.1102	3389582.395
1363	45133	24.9507999	308957.1102	3389582.395
1364	45134	24.9508991	308967.1102	3389582.395
1365	45135	24.9510002	308977.1102	3389582.395
1366	45136	24.9510994	308987.1102	3389582.395
1367	45137	24.9512005	308997.1102	3389582.395
1368	45138	24.9512997	309007.1102	3389582.395
1369	45139	24.9514008	309017.1102	3389582.395
1370	45140	24.9514999	309027.1102	3389582.395
1371	45141	24.9515991	309037.1102	3389582.395
1372	45142	24.9517002	309047.1102	3389582.395
1373	45143	24.9517994	309057.1102	3389582.395
1374	45144	24.9519005	309067.1102	3389582.395
1375	45145	24.9519997	309077.1102	3389582.395
1376	45146	24.9521008	309087.1102	3389582.395
1377	45147	24.9521999	309097.1102	3389582.395
1378	45148	24.9522991	309107.1102	3389582.395
1379	45149	24.9524002	309117.1102	3389582.395
1380	45150	24.9524994	309127.1102	3389582.395
1381	45151	24.9526005	309137.1102	3389582.395
1382	45152	24.9526997	309147.1102	3389582.395
1383	45153	24.9528008	309157.1102	3389582.395
1384	45154	24.9528999	309167.1102	3389582.395
1385	45155	24.9529991	309177.1102	3389582.395
1386	45156	24.9531002	309187.1102	3389582.395
1387	45157	24.9531994	309197.1102	3389582.395
1388	45158	24.9533005	309207.1102	3389582.395
1389	45159	24.9533997	309217.1102	3389582.395
1390	45160	24.9535007	309227.1102	3389582.395
1391	45161	24.9535999	309237.1102	3389582.395
1392	45162	24.9535999	309247.1102	3389582.395
1393	45163	24.9536991	309257.1102	3389582.395
1394	45164	24.9538002	309267.1102	3389582.395
1395	45165	24.9538994	309277.1102	3389582.395
1396	45166	24.9540005	309287.1102	3389582.395
1397	45167	24.9540997	309297.1102	3389582.395
1398	45168	24.9542007	309307.1102	3389582.395
1399	45169	24.9542999	309317.1102	3389582.395
1400	45170	24.9543991	309327.1102	3389582.395
1401	45171	24.9545002	309337.1102	3389582.395
1402	45172	24.9545994	309347.1102	3389582.395
1403	45173	24.9547005	309357.1102	3389582.395
1404	45174	24.9547997	309367.1102	3389582.395
1405	45175	24.9549007	309377.1102	3389582.395
1406	45176	24.9549999	309387.1102	3389582.395
1407	45177	24.9550991	309397.1102	3389582.395
1408	45178	24.9552002	309407.1102	3389582.395
1409	45179	24.9552994	309417.1102	3389582.395
1410	45180	24.9554005	309427.1102	3389582.395
1411	45181	24.9554996	309437.1102	3389582.395
1412	45182	24.9556007	309447.1102	3389582.395
1413	45183	24.9556999	309457.1102	3389582.395
1414	45184	24.9557991	309467.1102	3389582.395
1415	45185	24.9559002	309477.1102	3389582.395
1416	45186	24.9559994	309487.1102	3389582.395
1417	45187	24.9561005	309497.1102	3389582.395
1418	45188	24.9561996	309507.1102	3389582.395
1419	45189	24.9563007	309517.1102	3389582.395
1420	45190	24.9563999	309527.1102	3389582.395
1421	45191	24.9564991	309537.1102	3389582.395
1422	45192	24.9566002	309547.1102	3389582.395
1423	45193	24.9566994	309557.1102	3389582.395
1424	45194	24.9568005	309567.1102	3389582.395
1425	45195	24.9568996	309577.1102	3389582.395
1426	45196	24.9570007	309587.1102	3389582.395
1427	45197	24.9570999	309597.1102	3389582.395
1428	45198	24.9571991	309607.1102	3389582.395
1429	45199	24.9573002	309617.1102	3389582.395
1430	45200	24.9573994	309627.1102	3389582.395
1431	45201	24.9575005	309637.1102	3389582.395
1432	48300	24.9449997	308677.1102	3389572.395
1433	48301	24.9451008	308687.1102	3389572.395
1434	48302	24.9452	308697.1102	3389572.395
1435	48303	24.9452991	308707.1102	3389572.395
1436	48304	24.9454002	308717.1102	3389572.395
1437	48305	24.9454994	308727.1102	3389572.395
1438	48306	24.9456005	308737.1102	3389572.395
1439	48307	24.9456997	308747.1102	3389572.395
1440	48308	24.9458008	308757.1102	3389572.395
1441	48309	24.9459	308767.1102	3389572.395
1442	48310	24.9459991	308777.1102	3389572.395
1443	48311	24.9461002	308787.1102	3389572.395
1444	48312	24.9461994	308797.1102	3389572.395
1445	48313	24.9463005	308807.1102	3389572.395
1446	48314	24.9463997	308817.1102	3389572.395
1447	48315	24.9465008	308827.1102	3389572.395
1448	48316	24.9466	308837.1102	3389572.395
1449	48317	24.9466991	308847.1102	3389572.395
1450	48318	24.9468002	308857.1102	3389572.395
1451	48319	24.9468994	308867.1102	3389572.395
1452	48320	24.9470005	308877.1102	3389572.395
1453	48321	24.9470997	308887.1102	3389572.395
1454	48322	24.9472008	308897.1102	3389572.395
1455	48323	24.9473	308907.1102	3389572.395
1456	48324	24.9473991	308917.1102	3389572.395
1457	48325	24.9475002	308927.1102	3389572.395
1458	48326	24.9475994	308937.1102	3389572.395
1459	48327	24.9477005	308947.1102	3389572.395
1460	48328	24.9477997	308957.1102	3389572.395
1461	48329	24.9479008	308967.1102	3389572.395
1462	48330	24.948	308977.1102	3389572.395
1463	48331	24.9480991	308987.1102	3389572.395
1464	48332	24.9482002	308997.1102	3389572.395
1465	48333	24.9482994	309007.1102	3389572.395
1466	48334	24.9484005	309017.1102	3389572.395
1467	48335	24.9484997	309027.1102	3389572.395
1468	48336	24.9486008	309037.1102	3389572.395
1469	48337	24.9487	309047.1102	3389572.395
1470	48338	24.9487991	309057.1102	3389572.395
1471	48339	24.9489002	309067.1102	3389572.395
1472	48340	24.9489002	309077.1102	3389572.395
1473	48341	24.9489994	309087.1102	3389572.395
1474	48342	24.9491005	309097.1102	3389572.395
1475	48343	24.9491997	309107.1102	3389572.395
1476	48344	24.9493008	309117.1102	3389572.395
1477	48345	24.9493999	309127.1102	3389572.395
1478	48346	24.9494991	309137.1102	3389572.395
1479	48347	24.9496002	309147.1102	3389572.395
1480	48348	24.9496994	309157.1102	3389572.395
1481	48349	24.9498005	309167.1102	3389572.395
1482	48350	24.9498997	309177.1102	3389572.395
1483	48351	24.9500008	309187.1102	3389572.395
1484	48352	24.9500999	309197.1102	3389572.395
1485	48353	24.9501991	309207.1102	3389572.395
1486	48354	24.9503002	309217.1102	3389572.395
1487	48355	24.9503994	309227.1102	3389572.395
1488	48356	24.9505005	309237.1102	3389572.395
1489	48357	24.9505997	309247.1102	3389572.395
1490	48358	24.9507008	309257.1102	3389572.395
1491	48359	24.9507999	309267.1102	3389572.395
1492	48360	24.9508991	309277.1102	3389572.395
1493	48361	24.9510002	309287.1102	3389572.395
1494	48362	24.9510994	309297.1102	3389572.395
1495	48363	24.9512005	309307.1102	3389572.395
1496	48364	24.9512997	309317.1102	3389572.395
1497	48365	24.9514008	309327.1102	3389572.395
1498	48366	24.9514999	309337.1102	3389572.395
1499	48367	24.9515991	309347.1102	3389572.395
1500	48368	24.9517002	309357.1102	3389572.395
1501	48369	24.9517994	309367.1102	3389572.395
1502	48370	24.9519005	309377.1102	3389572.395
1503	48371	24.9519997	309387.1102	3389572.395
1504	48372	24.9521008	309397.1102	3389572.395
1505	48373	24.9521999	309407.1102	3389572.395
1506	48374	24.9522991	309417.1102	3389572.395
1507	48375	24.9524002	309427.1102	3389572.395
1508	48376	24.9524994	309437.1102	3389572.395
1509	48377	24.9526005	309447.1102	3389572.395
1510	48378	24.9526997	309457.1102	3389572.395
1511	48379	24.9528008	309467.1102	3389572.395
1512	48380	24.9528999	309477.1102	3389572.395
1513	48381	24.9529991	309487.1102	3389572.395
1514	48382	24.9531002	309497.1102	3389572.395
1515	48383	24.9531994	309507.1102	3389572.395
1516	48384	24.9533005	309517.1102	3389572.395
1517	48385	24.9533997	309527.1102	3389572.395
1518	48386	24.9535007	309537.1102	3389572.395
1519	48387	24.9535999	309547.1102	3389572.395
1520	48388	24.9535999	309557.1102	3389572.395
1521	48389	24.9536991	309567.1102	3389572.395
1522	48390	24.9538002	309577.1102	3389572.395
1523	48391	24.9538994	309587.1102	3389572.395
1524	48392	24.9540005	309597.1102	3389572.395
1525	48393	24.9540997	309607.1102	3389572.395
1526	48394	24.9542007	309617.1102	3389572.395
1527	48395	24.9542999	309627.1102	3389572.395
1528	51495	24.9419994	308677.1102	3389562.395
1529	51496	24.9421005	308687.1102	3389562.395
1530	51497	24.9421997	308697.1102	3389562.395
1531	51498	24.9423008	308707.1102	3389562.395
1532	51499	24.9424	308717.1102	3389562.395
1533	51500	24.9424992	308727.1102	3389562.395
1534	51501	24.9426003	308737.1102	3389562.395
1535	51502	24.9426994	308747.1102	3389562.395
1536	51503	24.9428005	308757.1102	3389562.395
1537	51504	24.9428997	308767.1102	3389562.395
1538	51505	24.9430008	308777.1102	3389562.395
1539	51506	24.9431	308787.1102	3389562.395
1540	51507	24.9431992	308797.1102	3389562.395
1541	51508	24.9433002	308807.1102	3389562.395
1542	51509	24.9433994	308817.1102	3389562.395
1543	51510	24.9435005	308827.1102	3389562.395
1544	51511	24.9435997	308837.1102	3389562.395
1545	51512	24.9437008	308847.1102	3389562.395
1546	51513	24.9438	308857.1102	3389562.395
1547	51514	24.9438992	308867.1102	3389562.395
1548	51515	24.9440002	308877.1102	3389562.395
1549	51516	24.9440994	308887.1102	3389562.395
1550	51517	24.9442005	308897.1102	3389562.395
1551	51518	24.9442997	308907.1102	3389562.395
1552	51519	24.9442997	308917.1102	3389562.395
1553	51520	24.9444008	308927.1102	3389562.395
1554	51521	24.9445	308937.1102	3389562.395
1555	51522	24.9445992	308947.1102	3389562.395
1556	51523	24.9447002	308957.1102	3389562.395
1557	51524	24.9447994	308967.1102	3389562.395
1558	51525	24.9449005	308977.1102	3389562.395
1559	51526	24.9449997	308987.1102	3389562.395
1560	51527	24.9451008	308997.1102	3389562.395
1561	51528	24.9452	309007.1102	3389562.395
1562	51529	24.9452991	309017.1102	3389562.395
1563	51530	24.9454002	309027.1102	3389562.395
1564	51531	24.9454994	309037.1102	3389562.395
1565	51532	24.9456005	309047.1102	3389562.395
1566	51533	24.9456997	309057.1102	3389562.395
1567	51534	24.9458008	309067.1102	3389562.395
1568	51535	24.9459	309077.1102	3389562.395
1569	51536	24.9459991	309087.1102	3389562.395
1570	51537	24.9461002	309097.1102	3389562.395
1571	51538	24.9461994	309107.1102	3389562.395
1572	51539	24.9463005	309117.1102	3389562.395
1573	51540	24.9463997	309127.1102	3389562.395
1574	51541	24.9465008	309137.1102	3389562.395
1575	51542	24.9466	309147.1102	3389562.395
1576	51543	24.9466991	309157.1102	3389562.395
1577	51544	24.9468002	309167.1102	3389562.395
1578	51545	24.9468994	309177.1102	3389562.395
1579	51546	24.9470005	309187.1102	3389562.395
1580	51547	24.9470997	309197.1102	3389562.395
1581	51548	24.9472008	309207.1102	3389562.395
1582	51549	24.9473	309217.1102	3389562.395
1583	51550	24.9473991	309227.1102	3389562.395
1584	51551	24.9475002	309237.1102	3389562.395
1585	51552	24.9475994	309247.1102	3389562.395
1586	51553	24.9477005	309257.1102	3389562.395
1587	51554	24.9477997	309267.1102	3389562.395
1588	51555	24.9479008	309277.1102	3389562.395
1589	51556	24.948	309287.1102	3389562.395
1590	51557	24.9480991	309297.1102	3389562.395
1591	51558	24.9482002	309307.1102	3389562.395
1592	51559	24.9482994	309317.1102	3389562.395
1593	51560	24.9484005	309327.1102	3389562.395
1594	51561	24.9484997	309337.1102	3389562.395
1595	51562	24.9486008	309347.1102	3389562.395
1596	51563	24.9487	309357.1102	3389562.395
1597	51564	24.9487991	309367.1102	3389562.395
1598	51565	24.9489002	309377.1102	3389562.395
1599	51566	24.9489994	309387.1102	3389562.395
1600	51567	24.9489994	309397.1102	3389562.395
1601	51568	24.9491005	309407.1102	3389562.395
1602	51569	24.9491997	309417.1102	3389562.395
1603	51570	24.9493008	309427.1102	3389562.395
1604	51571	24.9493999	309437.1102	3389562.395
1605	51572	24.9494991	309447.1102	3389562.395
1606	51573	24.9496002	309457.1102	3389562.395
1607	51574	24.9496994	309467.1102	3389562.395
1608	51575	24.9498005	309477.1102	3389562.395
1609	51576	24.9498997	309487.1102	3389562.395
1610	51577	24.9500008	309497.1102	3389562.395
1611	51578	24.9500999	309507.1102	3389562.395
1612	51579	24.9501991	309517.1102	3389562.395
1613	51580	24.9503002	309527.1102	3389562.395
1614	51581	24.9503994	309537.1102	3389562.395
1615	51582	24.9505005	309547.1102	3389562.395
1616	51583	24.9505997	309557.1102	3389562.395
1617	51584	24.9507008	309567.1102	3389562.395
1618	51585	24.9507999	309577.1102	3389562.395
1619	51586	24.9508991	309587.1102	3389562.395
1620	51587	24.9510002	309597.1102	3389562.395
1621	51588	24.9510994	309607.1102	3389562.395
1622	51589	24.9512005	309617.1102	3389562.395
1623	51590	24.9512997	309627.1102	3389562.395
1624	54690	24.9389992	308677.1102	3389552.395
1625	54691	24.9391003	308687.1102	3389552.395
1626	54692	24.9391994	308697.1102	3389552.395
1627	54693	24.9393005	308707.1102	3389552.395
1628	54694	24.9393997	308717.1102	3389552.395
1629	54695	24.9395008	308727.1102	3389552.395
1630	54696	24.9396	308737.1102	3389552.395
1631	54697	24.9396992	308747.1102	3389552.395
1632	54698	24.9398003	308757.1102	3389552.395
1633	54699	24.9398003	308767.1102	3389552.395
1634	54700	24.9398994	308777.1102	3389552.395
1635	54701	24.9400005	308787.1102	3389552.395
1636	54702	24.9400997	308797.1102	3389552.395
1637	54703	24.9402008	308807.1102	3389552.395
1638	54704	24.9403	308817.1102	3389552.395
1639	54705	24.9403992	308827.1102	3389552.395
1640	54706	24.9405003	308837.1102	3389552.395
1641	54707	24.9405994	308847.1102	3389552.395
1642	54708	24.9407005	308857.1102	3389552.395
1643	54709	24.9407997	308867.1102	3389552.395
1644	54710	24.9409008	308877.1102	3389552.395
1645	54711	24.941	308887.1102	3389552.395
1646	54712	24.9410992	308897.1102	3389552.395
1647	54713	24.9412003	308907.1102	3389552.395
1648	54714	24.9412994	308917.1102	3389552.395
1649	54715	24.9414005	308927.1102	3389552.395
1650	54716	24.9414997	308937.1102	3389552.395
1651	54717	24.9416008	308947.1102	3389552.395
1652	54718	24.9417	308957.1102	3389552.395
1653	54719	24.9417992	308967.1102	3389552.395
1654	54720	24.9419003	308977.1102	3389552.395
1655	54721	24.9419994	308987.1102	3389552.395
1656	54722	24.9421005	308997.1102	3389552.395
1657	54723	24.9421997	309007.1102	3389552.395
1658	54724	24.9423008	309017.1102	3389552.395
1659	54725	24.9424	309027.1102	3389552.395
1660	54726	24.9424992	309037.1102	3389552.395
1661	54727	24.9426003	309047.1102	3389552.395
1662	54728	24.9426994	309057.1102	3389552.395
1663	54729	24.9428005	309067.1102	3389552.395
1664	54730	24.9428997	309077.1102	3389552.395
1665	54731	24.9430008	309087.1102	3389552.395
1666	54732	24.9431	309097.1102	3389552.395
1667	54733	24.9431992	309107.1102	3389552.395
1668	54734	24.9433002	309117.1102	3389552.395
1669	54735	24.9433994	309127.1102	3389552.395
1670	54736	24.9435005	309137.1102	3389552.395
1671	54737	24.9435997	309147.1102	3389552.395
1672	54738	24.9437008	309157.1102	3389552.395
1673	54739	24.9438	309167.1102	3389552.395
1674	54740	24.9438992	309177.1102	3389552.395
1675	54741	24.9440002	309187.1102	3389552.395
1676	54742	24.9440994	309197.1102	3389552.395
1677	54743	24.9442005	309207.1102	3389552.395
1678	54744	24.9442997	309217.1102	3389552.395
1679	54745	24.9444008	309227.1102	3389552.395
1680	54746	24.9445	309237.1102	3389552.395
1681	54747	24.9445	309247.1102	3389552.395
1682	54748	24.9445992	309257.1102	3389552.395
1683	54749	24.9447002	309267.1102	3389552.395
1684	54750	24.9447994	309277.1102	3389552.395
1685	54751	24.9449005	309287.1102	3389552.395
1686	54752	24.9449997	309297.1102	3389552.395
1687	54753	24.9451008	309307.1102	3389552.395
1688	54754	24.9452	309317.1102	3389552.395
1689	54755	24.9452991	309327.1102	3389552.395
1690	54756	24.9454002	309337.1102	3389552.395
1691	54757	24.9454994	309347.1102	3389552.395
1692	54758	24.9456005	309357.1102	3389552.395
1693	54759	24.9456997	309367.1102	3389552.395
1694	54760	24.9458008	309377.1102	3389552.395
1695	54761	24.9459	309387.1102	3389552.395
1696	54762	24.9459991	309397.1102	3389552.395
1697	54763	24.9461002	309407.1102	3389552.395
1698	54764	24.9461994	309417.1102	3389552.395
1699	54765	24.9463005	309427.1102	3389552.395
1700	54766	24.9463997	309437.1102	3389552.395
1701	54767	24.9465008	309447.1102	3389552.395
1702	54768	24.9466	309457.1102	3389552.395
1703	54769	24.9466991	309467.1102	3389552.395
1704	54770	24.9468002	309477.1102	3389552.395
1705	54771	24.9468994	309487.1102	3389552.395
1706	54772	24.9470005	309497.1102	3389552.395
1707	54773	24.9470997	309507.1102	3389552.395
1708	54774	24.9472008	309517.1102	3389552.395
1709	54775	24.9473	309527.1102	3389552.395
1710	54776	24.9473991	309537.1102	3389552.395
1711	54777	24.9475002	309547.1102	3389552.395
1712	54778	24.9475994	309557.1102	3389552.395
1713	54779	24.9477005	309567.1102	3389552.395
1714	54780	24.9477997	309577.1102	3389552.395
1715	54781	24.9479008	309587.1102	3389552.395
1716	54782	24.948	309597.1102	3389552.395
1717	54783	24.9480991	309607.1102	3389552.395
1718	54784	24.9482002	309617.1102	3389552.395
1719	57885	24.9358997	308677.1102	3389542.395
1720	57886	24.9360008	308687.1102	3389542.395
1721	57887	24.9361	308697.1102	3389542.395
1722	57888	24.9361992	308707.1102	3389542.395
1723	57889	24.9363003	308717.1102	3389542.395
1724	57890	24.9363995	308727.1102	3389542.395
1725	57891	24.9365005	308737.1102	3389542.395
1726	57892	24.9365997	308747.1102	3389542.395
1727	57893	24.9367008	308757.1102	3389542.395
1728	57894	24.9368	308767.1102	3389542.395
1729	57895	24.9368992	308777.1102	3389542.395
1730	57896	24.9370003	308787.1102	3389542.395
1731	57897	24.9370995	308797.1102	3389542.395
1732	57898	24.9372005	308807.1102	3389542.395
1733	57899	24.9372997	308817.1102	3389542.395
1734	57900	24.9374008	308827.1102	3389542.395
1735	57901	24.9375	308837.1102	3389542.395
1736	57902	24.9375992	308847.1102	3389542.395
1737	57903	24.9377003	308857.1102	3389542.395
1738	57904	24.9377995	308867.1102	3389542.395
1739	57905	24.9379005	308877.1102	3389542.395
1740	57906	24.9379997	308887.1102	3389542.395
1741	57907	24.9381008	308897.1102	3389542.395
1742	57908	24.9382	308907.1102	3389542.395
1743	57909	24.9382992	308917.1102	3389542.395
1744	57910	24.9384003	308927.1102	3389542.395
1745	57911	24.9384995	308937.1102	3389542.395
1746	57912	24.9386005	308947.1102	3389542.395
1747	57913	24.9386997	308957.1102	3389542.395
1748	57914	24.9388008	308967.1102	3389542.395
1749	57915	24.9389	308977.1102	3389542.395
1750	57916	24.9389992	308987.1102	3389542.395
1751	57917	24.9391003	308997.1102	3389542.395
1752	57918	24.9391994	309007.1102	3389542.395
1753	57919	24.9393005	309017.1102	3389542.395
1754	57920	24.9393997	309027.1102	3389542.395
1755	57921	24.9395008	309037.1102	3389542.395
1756	57922	24.9396	309047.1102	3389542.395
1757	57923	24.9396992	309057.1102	3389542.395
1758	57924	24.9398003	309067.1102	3389542.395
1759	57925	24.9398003	309077.1102	3389542.395
1760	57926	24.9398994	309087.1102	3389542.395
1761	57927	24.9400005	309097.1102	3389542.395
1762	57928	24.9400997	309107.1102	3389542.395
1763	57929	24.9402008	309117.1102	3389542.395
1764	57930	24.9403	309127.1102	3389542.395
1765	57931	24.9403992	309137.1102	3389542.395
1766	57932	24.9405003	309147.1102	3389542.395
1767	57933	24.9405994	309157.1102	3389542.395
1768	57934	24.9407005	309167.1102	3389542.395
1769	57935	24.9407997	309177.1102	3389542.395
1770	57936	24.9409008	309187.1102	3389542.395
1771	57937	24.941	309197.1102	3389542.395
1772	57938	24.9410992	309207.1102	3389542.395
1773	57939	24.9412003	309217.1102	3389542.395
1774	57940	24.9412994	309227.1102	3389542.395
1775	57941	24.9414005	309237.1102	3389542.395
1776	57942	24.9414997	309247.1102	3389542.395
1777	57943	24.9416008	309257.1102	3389542.395
1778	57944	24.9417	309267.1102	3389542.395
1779	57945	24.9417992	309277.1102	3389542.395
1780	57946	24.9419003	309287.1102	3389542.395
1781	57947	24.9419994	309297.1102	3389542.395
1782	57948	24.9421005	309307.1102	3389542.395
1783	57949	24.9421997	309317.1102	3389542.395
1784	57950	24.9423008	309327.1102	3389542.395
1785	57951	24.9424	309337.1102	3389542.395
1786	57952	24.9424992	309347.1102	3389542.395
1787	57953	24.9426003	309357.1102	3389542.395
1788	57954	24.9426994	309367.1102	3389542.395
1789	57955	24.9428005	309377.1102	3389542.395
1790	57956	24.9428997	309387.1102	3389542.395
1791	57957	24.9430008	309397.1102	3389542.395
1792	57958	24.9431	309407.1102	3389542.395
1793	57959	24.9431992	309417.1102	3389542.395
1794	57960	24.9433002	309427.1102	3389542.395
1795	57961	24.9433994	309437.1102	3389542.395
1796	57962	24.9435005	309447.1102	3389542.395
1797	57963	24.9435997	309457.1102	3389542.395
1798	57964	24.9437008	309467.1102	3389542.395
1799	57965	24.9438	309477.1102	3389542.395
1800	57966	24.9438992	309487.1102	3389542.395
1801	57967	24.9440002	309497.1102	3389542.395
1802	57968	24.9440994	309507.1102	3389542.395
1803	57969	24.9442005	309517.1102	3389542.395
1804	57970	24.9442997	309527.1102	3389542.395
1805	57971	24.9444008	309537.1102	3389542.395
1806	57972	24.9445	309547.1102	3389542.395
1807	57973	24.9445	309557.1102	3389542.395
1808	57974	24.9445992	309567.1102	3389542.395
1809	57975	24.9447002	309577.1102	3389542.395
1810	57976	24.9447994	309587.1102	3389542.395
1811	57977	24.9449005	309597.1102	3389542.395
1812	57978	24.9449997	309607.1102	3389542.395
1813	57979	24.9451008	309617.1102	3389542.395
1814	61080	24.9328995	308677.1102	3389532.395
1815	61081	24.9330006	308687.1102	3389532.395
1816	61082	24.9330997	308697.1102	3389532.395
1817	61083	24.9332008	308707.1102	3389532.395
1818	61084	24.9333	308717.1102	3389532.395
1819	61085	24.9333992	308727.1102	3389532.395
1820	61086	24.9335003	308737.1102	3389532.395
1821	61087	24.9335995	308747.1102	3389532.395
1822	61088	24.9337006	308757.1102	3389532.395
1823	61089	24.9337997	308767.1102	3389532.395
1824	61090	24.9339008	308777.1102	3389532.395
1825	61091	24.934	308787.1102	3389532.395
1826	61092	24.9340992	308797.1102	3389532.395
1827	61093	24.9342003	308807.1102	3389532.395
1828	61094	24.9342995	308817.1102	3389532.395
1829	61095	24.9344006	308827.1102	3389532.395
1830	61096	24.9344997	308837.1102	3389532.395
1831	61097	24.9346008	308847.1102	3389532.395
1832	61098	24.9347	308857.1102	3389532.395
1833	61099	24.9347992	308867.1102	3389532.395
1834	61100	24.9349003	308877.1102	3389532.395
1835	61101	24.9349995	308887.1102	3389532.395
1836	61102	24.9351006	308897.1102	3389532.395
1837	61103	24.9351997	308907.1102	3389532.395
1838	61104	24.9351997	308917.1102	3389532.395
1839	61105	24.9353008	308927.1102	3389532.395
1840	61106	24.9354	308937.1102	3389532.395
1841	61107	24.9354992	308947.1102	3389532.395
1842	61108	24.9356003	308957.1102	3389532.395
1843	61109	24.9356995	308967.1102	3389532.395
1844	61110	24.9358006	308977.1102	3389532.395
1845	61111	24.9358997	308987.1102	3389532.395
1846	61112	24.9360008	308997.1102	3389532.395
1847	61113	24.9361	309007.1102	3389532.395
1848	61114	24.9361992	309017.1102	3389532.395
1849	61115	24.9363003	309027.1102	3389532.395
1850	61116	24.9363995	309037.1102	3389532.395
1851	61117	24.9365005	309047.1102	3389532.395
1852	61118	24.9365997	309057.1102	3389532.395
1853	61119	24.9367008	309067.1102	3389532.395
1854	61120	24.9368	309077.1102	3389532.395
1855	61121	24.9368992	309087.1102	3389532.395
1856	61122	24.9370003	309097.1102	3389532.395
1857	61123	24.9370995	309107.1102	3389532.395
1858	61124	24.9372005	309117.1102	3389532.395
1859	61125	24.9372997	309127.1102	3389532.395
1860	61126	24.9374008	309137.1102	3389532.395
1861	61127	24.9375	309147.1102	3389532.395
1862	61128	24.9375992	309157.1102	3389532.395
1863	61129	24.9377003	309167.1102	3389532.395
1864	61130	24.9377995	309177.1102	3389532.395
1865	61131	24.9379005	309187.1102	3389532.395
1866	61132	24.9379997	309197.1102	3389532.395
1867	61133	24.9381008	309207.1102	3389532.395
1868	61134	24.9382	309217.1102	3389532.395
1869	61135	24.9382992	309227.1102	3389532.395
1870	61136	24.9384003	309237.1102	3389532.395
1871	61137	24.9384995	309247.1102	3389532.395
1872	61138	24.9386005	309257.1102	3389532.395
1873	61139	24.9386997	309267.1102	3389532.395
1874	61140	24.9388008	309277.1102	3389532.395
1875	61141	24.9389	309287.1102	3389532.395
1876	61142	24.9389992	309297.1102	3389532.395
1877	61143	24.9391003	309307.1102	3389532.395
1878	61144	24.9391994	309317.1102	3389532.395
1879	61145	24.9393005	309327.1102	3389532.395
1880	61146	24.9393997	309337.1102	3389532.395
1881	61147	24.9395008	309347.1102	3389532.395
1882	61148	24.9396	309357.1102	3389532.395
1883	61149	24.9396992	309367.1102	3389532.395
1884	61150	24.9398003	309377.1102	3389532.395
1885	61151	24.9398994	309387.1102	3389532.395
1886	61152	24.9398994	309397.1102	3389532.395
1887	61153	24.9400005	309407.1102	3389532.395
1888	61154	24.9400997	309417.1102	3389532.395
1889	61155	24.9402008	309427.1102	3389532.395
1890	61156	24.9403	309437.1102	3389532.395
1891	61157	24.9403992	309447.1102	3389532.395
1892	61158	24.9405003	309457.1102	3389532.395
1893	61159	24.9405994	309467.1102	3389532.395
1894	61160	24.9407005	309477.1102	3389532.395
1895	61161	24.9407997	309487.1102	3389532.395
1896	61162	24.9409008	309497.1102	3389532.395
1897	61163	24.941	309507.1102	3389532.395
1898	61164	24.9410992	309517.1102	3389532.395
1899	61165	24.9412003	309527.1102	3389532.395
1900	61166	24.9412994	309537.1102	3389532.395
1901	61167	24.9414005	309547.1102	3389532.395
1902	61168	24.9414997	309557.1102	3389532.395
1903	61169	24.9416008	309567.1102	3389532.395
1904	61170	24.9417	309577.1102	3389532.395
1905	61171	24.9417992	309587.1102	3389532.395
1906	61172	24.9419003	309597.1102	3389532.395
1907	61173	24.9419994	309607.1102	3389532.395
1908	61174	24.9421005	309617.1102	3389532.395
1909	64275	24.9298992	308677.1102	3389522.395
1910	64276	24.9300003	308687.1102	3389522.395
1911	64277	24.9300995	308697.1102	3389522.395
1912	64278	24.9302006	308707.1102	3389522.395
1913	64279	24.9302998	308717.1102	3389522.395
1914	64280	24.9304008	308727.1102	3389522.395
1915	64281	24.9305	308737.1102	3389522.395
1916	64282	24.9305992	308747.1102	3389522.395
1917	64283	24.9307003	308757.1102	3389522.395
1918	64284	24.9307003	308767.1102	3389522.395
1919	64285	24.9307995	308777.1102	3389522.395
1920	64286	24.9309006	308787.1102	3389522.395
1921	64287	24.9309998	308797.1102	3389522.395
1922	64288	24.9311008	308807.1102	3389522.395
1923	64289	24.9312	308817.1102	3389522.395
1924	64290	24.9312992	308827.1102	3389522.395
1925	64291	24.9314003	308837.1102	3389522.395
1926	64292	24.9314995	308847.1102	3389522.395
1927	64293	24.9316006	308857.1102	3389522.395
1928	64294	24.9316998	308867.1102	3389522.395
1929	64295	24.9318008	308877.1102	3389522.395
1930	64296	24.9319	308887.1102	3389522.395
1931	64297	24.9319992	308897.1102	3389522.395
1932	64298	24.9321003	308907.1102	3389522.395
1933	64299	24.9321995	308917.1102	3389522.395
1934	64300	24.9323006	308927.1102	3389522.395
1935	64301	24.9323997	308937.1102	3389522.395
1936	64302	24.9325008	308947.1102	3389522.395
1937	64303	24.9326	308957.1102	3389522.395
1938	64304	24.9326992	308967.1102	3389522.395
1939	64305	24.9328003	308977.1102	3389522.395
1940	64306	24.9328995	308987.1102	3389522.395
1941	64307	24.9330006	308997.1102	3389522.395
1942	64308	24.9330997	309007.1102	3389522.395
1943	64309	24.9332008	309017.1102	3389522.395
1944	64310	24.9333	309027.1102	3389522.395
1945	64311	24.9333992	309037.1102	3389522.395
1946	64312	24.9335003	309047.1102	3389522.395
1947	64313	24.9335995	309057.1102	3389522.395
1948	64314	24.9337006	309067.1102	3389522.395
1949	64315	24.9337997	309077.1102	3389522.395
1950	64316	24.9339008	309087.1102	3389522.395
1951	64317	24.934	309097.1102	3389522.395
1952	64318	24.9340992	309107.1102	3389522.395
1953	64319	24.9342003	309117.1102	3389522.395
1954	64320	24.9342995	309127.1102	3389522.395
1955	64321	24.9344006	309137.1102	3389522.395
1956	64322	24.9344997	309147.1102	3389522.395
1957	64323	24.9346008	309157.1102	3389522.395
1958	64324	24.9347	309167.1102	3389522.395
1959	64325	24.9347992	309177.1102	3389522.395
1960	64326	24.9349003	309187.1102	3389522.395
1961	64327	24.9349995	309197.1102	3389522.395
1962	64328	24.9351006	309207.1102	3389522.395
1963	64329	24.9351997	309217.1102	3389522.395
1964	64330	24.9353008	309227.1102	3389522.395
1965	64331	24.9353008	309237.1102	3389522.395
1966	64332	24.9354	309247.1102	3389522.395
1967	64333	24.9354992	309257.1102	3389522.395
1968	64334	24.9356003	309267.1102	3389522.395
1969	64335	24.9356995	309277.1102	3389522.395
1970	64336	24.9358006	309287.1102	3389522.395
1971	64337	24.9358997	309297.1102	3389522.395
1972	64338	24.9360008	309307.1102	3389522.395
1973	64339	24.9361	309317.1102	3389522.395
1974	64340	24.9361992	309327.1102	3389522.395
1975	64341	24.9363003	309337.1102	3389522.395
1976	64342	24.9363995	309347.1102	3389522.395
1977	64343	24.9365005	309357.1102	3389522.395
1978	64344	24.9365997	309367.1102	3389522.395
1979	64345	24.9367008	309377.1102	3389522.395
1980	64346	24.9368	309387.1102	3389522.395
1981	64347	24.9368992	309397.1102	3389522.395
1982	64348	24.9370003	309407.1102	3389522.395
1983	64349	24.9370995	309417.1102	3389522.395
1984	64350	24.9372005	309427.1102	3389522.395
1985	64351	24.9372997	309437.1102	3389522.395
1986	64352	24.9374008	309447.1102	3389522.395
1987	64353	24.9375	309457.1102	3389522.395
1988	64354	24.9375992	309467.1102	3389522.395
1989	64355	24.9377003	309477.1102	3389522.395
1990	64356	24.9377995	309487.1102	3389522.395
1991	64357	24.9379005	309497.1102	3389522.395
1992	64358	24.9379997	309507.1102	3389522.395
1993	64359	24.9381008	309517.1102	3389522.395
1994	64360	24.9382	309527.1102	3389522.395
1995	64361	24.9382992	309537.1102	3389522.395
1996	64362	24.9384003	309547.1102	3389522.395
1997	64363	24.9384995	309557.1102	3389522.395
1998	64364	24.9386005	309567.1102	3389522.395
[truncated: 998,000+ more rows]
