# Supplementary material for: A multi-proxy assessment of terrace formation in the lower Trinity River valley, Texas
Source: Copernicus journal article supplement (doi:10.5194/esurf-10-635-2022), 2022-06-28
Supplement: Supplementary file 1 [file esurf-10-635-2022-supplement.zip › Trinity_Terraces_Plane_Fitting_Output.csv]

Model_Run	Terrace_Level	Param_A	Param_B	Param_C	Param_A_Error	Param_B_Error	Param_C_Error	Stirke_deg	Strike_Error_deg	Dip_deg	Dip_Error_deg	RMSE	Num_Terraces_in_Group
0	1	-4.89966420786354e-05	0.000285428632994412	-926.803009528646	5.08854574602577e-06	3.00554369712993e-06	11.4301037858817	80.2595478447035	0.997303160712873	0.0165930566735994	0.000176745047555951	1.42939000993596	8
0	2	-7.59509306069976e-05	0.00027673579173195	-887.250271621552	2.94166258391928e-06	8.06313099353913e-07	3.53172362597173	74.6528973557053	0.567983982017399	0.0164421156225387	6.30449344491608e-05	1.54354520097418	19
0	3	-0.000145260212537692	0.000261295577886832	-808.494230644988	2.13152612984041e-06	6.7296747585149e-07	2.83868146430208	60.9293122374295	0.362504468616687	0.0171290333363459	6.82422556091225e-05	1.40839611720852	22
1	1	-6.44876957444158e-05	0.000354652381583244	-1149.10827116688	8.07316569545145e-06	2.58756712425582e-06	11.1421195750976	79.6943020879509	1.26465754469173	0.0206532779197914	0.000167703320903357	2.3299126142227	8
2	1	0.000302843688730562	0.000292832403056099	-1062.4812519346	9.82165351912395e-06	2.41791147925184e-06	11.0243636397292	135.962856200942	0.958189740215513	0.0241367674218793	0.000415851045634095	1.50996907945846	8
3	1	-9.78058602136031e-05	0.000264777612575512	-839.63513785687	1.33051731630959e-05	4.47639727805303e-06	19.0251861293403	69.7263393942423	2.55293933429894	0.0161725562756772	0.000357293853347857	2.6790346484524	8
4	1	-0.000439834319745059	0.000227212853083829	-601.374483899462	4.2450377911461e-06	1.83905386142427e-06	7.32831512896816	27.3203049624007	0.294289287903586	0.0283645862349431	0.00022143777409621	1.94597812136357	8
5	1	0.000528852982913351	0.00036842922149377	-1388.59266350338	1.23177948553545e-05	3.26627510494012e-06	14.6886594796594	145.136725500459	0.669724183765392	0.0369291391294269	0.000588884833446664	1.74709514168689	8
6	1	-0.000468449639470269	0.000123918786313524	-246.438802666723	5.58089386298359e-06	2.0492351210432e-06	8.40980559293618	14.817039618896	0.288706972130534	0.0277633907210202	0.000310583510415729	2.71935089847891	8
7	1	0.000160914241614419	0.000311849609269583	-1080.45280813154	7.77675278344052e-06	3.21038176266729e-06	12.8292527279309	117.293711296941	1.15369340410449	0.0201061300880383	0.000261660922030504	2.22011910559049	8
8	1	-0.000457758493062052	0.000189407317778359	-468.428114375886	5.25184239183081e-06	1.98914859157465e-06	8.16018856791991	22.4783668142496	0.314836620258299	0.0283841423672015	0.000281440232291492	2.4300204052421	8
9	1	-0.000201113693698089	0.000159917396081454	-448.797548684348	7.89117191010987e-06	3.70978049918597e-06	14.6785379327474	38.4902867313615	1.27226148162276	0.0147218145284	0.000377806979623382	1.97003234479751	8
10	1	0.0002826412700056	0.00032606743838059	-1168.03155829938	1.16042503124765e-05	3.01852073664856e-06	13.7202708152346	130.919348994503	1.19349815911041	0.0247240443015642	0.000454676074645274	2.28065486994575	8
11	1	-6.11297045525592e-05	0.000320365514750243	-1036.44915435753	6.23257565763317e-06	1.84169732345157e-06	7.9658781711865	79.1971157383279	1.07721491306962	0.0186867614650907	0.000123383338493165	1.98199782561014	8
12	1	0.000164627890528956	0.000335202592781447	-1159.16353019748	3.69032528746315e-06	1.00903392693239e-06	4.12042439267801	116.157017695617	0.512762500290107	0.0213969711673201	0.00010668125805843	1.26789149765767	8
13	1	-5.18548326772e-05	0.00021451236856334	-685.271834826451	8.09809601786079e-06	2.627682122938e-06	11.2022651336235	76.4103891044986	2.04984438907495	0.0126446578356081	0.000182485640163982	2.34703969755515	8
14	1	0.000124316156318723	0.000277709325666274	-954.590723565987	5.42683490130124e-06	1.3835285455967e-06	6.23209814104653	114.115603185972	0.938786128290426	0.0174330796731681	0.000146199552642713	1.37750715169051	8
15	1	0.00014471994689686	0.000373490461681142	-1281.55313696564	4.43147228087187e-06	6.99351646788321e-07	3.49216741498056	111.180334881405	0.59217591515866	0.0229497292474719	9.90538137496394e-05	1.22440362528413	8
16	1	-0.000280003720569996	0.000191556275958602	-534.324270215983	8.52655536766898e-06	5.13407609643415e-06	19.5170425112697	34.3768299054282	1.08315505656613	0.0194380423552047	0.000436078310587633	2.35549996608065	8
17	1	0.000370156131400675	0.000313307485457327	-1152.99226229043	4.07877725780957e-06	1.051103751187e-06	4.49443882386883	139.754762151579	0.325445221693438	0.0277856238578522	0.000182571516063392	1.77712389951848	8
18	1	9.50305831211328e-05	0.000252377269022105	-859.177085994426	6.41871431450301e-06	2.06329181146795e-06	8.79725796802162	110.633451905533	1.28556734594125	0.0154512912619111	0.000170397126398846	1.24203468135822	8
19	1	-0.000116706068221144	0.000187438988875579	-574.087823272255	4.61152947763282e-06	1.4811797314373e-06	6.15059083005814	58.0921632897013	1.03594218044469	0.0126510429595896	0.000157142179648355	2.03677998991712	8
20	1	-7.72069842443611e-06	0.000262094827427874	-859.539842376341	6.91867163002001e-06	2.26342895427123e-06	9.61410258307949	88.3126887645188	1.51122931730059	0.0150234411762824	0.000130153133637837	1.94894448851707	8
21	1	0.000382030710076684	0.000306283875583352	-1135.3124101828	1.05987646774332e-05	2.45469715532161e-06	10.4021696880649	141.279949254936	0.807485881812773	0.028054885181291	0.000481893093178585	2.04317495143302	8
22	1	9.34010031207787e-05	0.00022515393594184	-768.330998927808	8.78310213351494e-06	3.39821710443796e-06	13.9230641486417	112.530226263766	1.93132208531512	0.0139663137368871	0.000263675928998502	1.61554228900341	8
23	1	-7.02728658476734e-05	0.000320025582662228	-1033.55501651547	8.26810115759517e-06	2.37708265414685e-06	10.5574854402962	77.6152552355013	1.41499848242216	0.0187729725790291	0.000167390015842467	1.59984880335877	8
24	1	-0.000207961720874388	0.000184909064882398	-536.520583827488	4.28027201491754e-06	1.10117517556306e-06	4.81674499562958	41.6418802653974	0.609604563626481	0.0159442362675577	0.000188005898410731	1.21656949330443	8
25	1	-0.000507089381913612	0.000146210253923851	-307.897021563067	5.79732853227994e-06	2.311457358672e-06	9.31772592381806	16.0839807583256	0.297567728933981	0.0302376828986723	0.000321262519283502	2.75151385402535	8
26	1	-0.000207741043735316	0.000166487598874116	-472.97587897508	5.74502485398964e-06	1.9471758937729e-06	8.11849184460042	38.7093453050471	0.839532150897452	0.0152534298573812	0.000266164317820048	2.20823599819755	8
27	1	0.000259695793502969	0.000342125928708995	-1213.7889199173	6.72866283467506e-06	2.20950010355985e-06	9.09502978962408	127.200858444307	0.736797553954133	0.0246099902362857	0.000253967909461254	1.88874374900944	8
28	1	5.25263690908725e-05	0.000277597334837389	-929.98592969246	5.90603306171772e-06	1.70377122322993e-06	7.27261608231242	100.714708059296	1.17861490899536	0.0161873806031565	0.000114708883234356	2.74652827013015	8
29	1	-0.000132762917503172	0.000214966882046695	-662.060453139827	5.03418095617199e-06	1.90797736396788e-06	7.51886259219153	58.3006434177854	0.997551151796661	0.0144763147087588	0.000177826480439331	1.6088133694075	8
30	1	-0.000104523051779722	0.000208647399403537	-648.410261363864	7.48546286445965e-06	2.2430858757999e-06	9.79867525320943	63.3911709779581	1.66159506513551	0.0133707780867667	0.000223840823911689	2.21150040338149	8
31	1	0.000298977819074689	0.000333506941193473	-1196.68328094816	8.12298469201425e-06	2.51195303802698e-06	10.7622276437927	131.875164165569	0.802894999507203	0.0256627910905536	0.000328631859648612	1.95128600536669	8
32	1	0.000641166279288043	0.000370935421905104	-1435.09822592087	9.29308371758199e-06	1.62737005345352e-06	6.88654185334156	149.949230648898	0.376090138004082	0.0424409406698203	0.000463241932791387	1.38848697284854	8
33	1	0.000288565695291499	0.000282553547954609	-1025.55939037021	8.26422598012476e-06	2.12946071448495e-06	9.41711512987849	135.603127890986	0.848190867536873	0.0231397395766919	0.000348926870604536	1.93055569100417	8
34	1	-0.000547547483419544	0.000120040189800683	-206.564777941076	9.13408823625583e-06	3.12575763925813e-06	13.3182220368514	12.3654659931032	0.370632236837336	0.0321172271688681	0.000512640375394948	2.12183877082952	8
35	1	0.000143198231743339	0.000234363187810883	-814.219248590616	7.64724622036866e-06	2.06397609373262e-06	9.29955994326507	121.42534392927	1.37971362257227	0.0157362035424455	0.000249743281588646	1.39577008838621	8
36	1	5.09089732482654e-05	0.000247064977294175	-826.632973400336	1.66706404618235e-05	4.7141145327957e-06	20.9167876200328	101.643123233731	3.71484666788706	0.0144531740023695	0.000327323180512991	1.6824330118307	8
37	1	0.000338921701021741	0.000361862819131163	-1306.33948419878	8.43970520922669e-06	1.14494972672702e-06	6.17383967592971	133.125015657352	0.71757527951283	0.0284069550441473	0.000334007124763581	1.96727698945793	8
38	1	-0.000355733557397787	0.000207594321078125	-564.252906756639	5.38949714869594e-06	1.73351980599719e-06	7.24122558556301	30.2664199427791	0.431477475655362	0.0235987500455792	0.000271361467272888	2.02660381156775	8
39	1	-0.000161714630122814	0.000274264049661613	-847.199451347299	7.46161980897896e-06	2.42143806104684e-06	10.4022268536757	59.475073741252	1.17764224763563	0.0182424204668337	0.000247858080860785	1.98275026077437	8
40	1	0.000148334963418714	0.000300666699486543	-1037.79443436463	7.40138497060965e-06	2.27221936346904e-06	9.92779836987334	116.259588059873	1.14726911748075	0.0192093632501269	0.000220984326700977	1.45749920434319	8
41	1	-0.000173976832902583	0.000188645875466038	-559.531080320591	5.58941920114288e-06	1.53343635110973e-06	6.78704351038602	47.3165019830022	0.946281912340834	0.0147033966881622	0.000226515808594188	1.75114175075766	8
42	1	-0.000354941232168545	0.000297588896816178	-867.698687963943	5.14007292401778e-06	2.19481807231779e-06	8.55770532181965	39.9770531670133	0.458431011309655	0.0265386727357111	0.000239705793572274	1.71247935474864	8
43	1	0.00051549044851435	0.000395262481815644	-1476.6631271467	1.35558247678805e-05	1.52441279029076e-06	8.34734848149655	142.520100844903	0.735328002296559	0.037218568944553	0.000618643486343029	1.44624878160621	8
44	1	-4.93910797012944e-05	0.000263776467937954	-852.613529149148	4.52325380681459e-06	1.78960258447269e-06	7.16974039135404	79.3944060909384	0.951831515885951	0.0153759392431994	0.000111502288505019	1.67521935073435	8
45	1	9.02013515347316e-05	0.000339577452947138	-1151.00437490392	9.06284975492854e-06	1.19749065562446e-06	6.33155346935172	104.875853886469	1.42924129488735	0.0201310594775066	0.000148890114029247	2.27028537044136	8
46	1	0.000355971890603482	0.000227998825487683	-864.841454550148	9.97046335056938e-06	1.5739703651064e-06	7.51233518168899	147.360571711773	0.750677465059277	0.02422056199336	0.000483504709317046	2.16029759000093	8
47	1	-0.000629776765242513	0.000213173752558443	-495.396555448055	9.75614525424921e-06	3.20870563690138e-06	13.5284032476114	18.7004961319741	0.375844965242776	0.0380946575130281	0.000532746398212105	2.55280304801714	8
48	1	-6.78094980782847e-06	0.000359365938653853	-1185.50267686902	9.14975942202492e-06	3.0134271956628e-06	12.7482113681255	88.9190024353594	1.45830773842963	0.020593815918005	0.000172908999493801	1.58994556804851	8
49	1	0.000154985118611755	0.000286368316087768	-993.427844605683	1.03629660066168e-05	2.56087597040532e-06	10.9625310300965	118.422652135602	1.61794658065735	0.0186565468343076	0.000310676924004757	1.85295748331802	8
50	1	-0.000531089384348782	0.000149914128734797	-313.199659568101	8.03139514074605e-06	2.61391855591861e-06	11.0307153070725	15.763133698744	0.345737831386362	0.0316182448357551	0.000444724459957866	2.54895800041604	8
51	1	-0.000188900046138906	0.000194675471616124	-575.367711692292	4.12121229121546e-06	1.89600246814886e-06	7.15741291118103	45.8626267485777	0.684146986032008	0.0155420294212831	0.000181981065753567	1.86827705860237	8
52	1	2.63705270682684e-05	0.000240654403659473	-797.964464507466	6.27327120104388e-06	1.94661034532746e-06	8.40436557092356	96.2534308914764	1.4766925885615	0.0138710164482347	0.000117578762964619	1.89146557691763	8
53	1	-8.86174606408497e-06	0.000270272757573909	-887.012046624141	4.48457324794003e-06	1.62812830898949e-06	6.54600112206986	88.1220496682711	0.949741916365155	0.0154938096286799	9.36142290762344e-05	1.25842258584132	8
54	1	0.0002311598533473	0.000245788074325214	-884.227382917357	6.43920852644286e-06	1.31942785894354e-06	5.95338098696744	133.243261752031	0.811173520765661	0.0193322656423334	0.000258688889203297	1.59990545588308	8
55	1	0.000248538753018091	0.000313047014495684	-1113.62308392518	4.47596100144198e-06	1.33144032562604e-06	5.5697336531904	128.447265265731	0.51630829552888	0.0229018281901574	0.000170286417504558	1.24497068831991	8
56	1	-0.000364260282229779	0.00023529151585204	-654.531064951878	5.18834446625263e-06	2.55110359829811e-06	9.98103377892612	32.8601708726173	0.467456905754445	0.0248460045943091	0.000261998256735815	2.41141180662109	8
57	1	-0.000299461440353787	0.000162832089821778	-431.84918108026	5.80450118229826e-06	2.17060223620298e-06	8.90351254273153	28.5351265024746	0.565653086997968	0.0195303348771461	0.000298152705815714	2.38445754869878	8
58	1	-0.000112101814003117	0.000209803193032114	-650.727165262436	7.90685902106377e-06	2.23526168785562e-06	9.5878466550956	61.8835668794205	1.69880073389934	0.0136291948492726	0.000241537508331087	2.48876112215887	8
59	1	0.000242889480882912	0.000329839247152843	-1166.65437725958	3.25675699585283e-06	8.32813300744709e-07	3.45317400664822	126.367464728815	0.373261226839861	0.0234695437846426	0.00011712725956747	1.42655190992748	8
60	1	-0.000229903195777188	0.000202039263894	-586.301222780802	5.05185698642008e-06	1.58706183368679e-06	6.64584594237248	41.3090530484964	0.662977347854151	0.017536190947709	0.000225557081194824	1.4973341383593	8
61	1	0.00039142295607065	0.000348542683686547	-1279.16090976289	8.10511895613673e-06	2.26559634406264e-06	10.0359757299493	138.316524326006	0.617586097637325	0.0300294326092967	0.000357401531563299	1.95984738298893	8
62	1	-3.86469345656532e-05	0.000184436947072266	-589.103157409116	8.66202686905717e-06	2.29562078330162e-06	10.2634245990859	78.16546109945	2.58167177232583	0.0107969593740336	0.00016411051834107	1.8067197408289	8
63	1	-0.000187292069035639	0.000130799329250889	-361.368420435627	3.48810414313585e-06	1.14755898800525e-06	4.66402938127983	34.9293272527544	0.553705286346311	0.0130888921855785	0.000168120953031358	1.48720101183519	8
64	1	-0.000364065355760743	0.000148092577254447	-361.029140434964	5.25596859951138e-06	1.99172078371719e-06	8.12229142537995	22.135248175548	0.394567423899003	0.0225191350037619	0.000282244062038549	1.62640137409801	8
65	1	0.000278082184702854	0.000325948232255638	-1166.51359193905	7.3864927286091e-06	1.3339649567078e-06	6.43180170264139	130.469096850111	0.760322467525758	0.0245485456876224	0.000280769054944205	2.64184974430702	8
66	1	-0.000138977290597983	0.000287204187333796	-899.261819506516	5.50286326419979e-06	1.6990186008871e-06	7.04544136491148	64.1777920352065	0.899381872179999	0.018280938849216	0.000162908381186697	2.46424313380443	8
67	1	-0.000540182126528688	0.000218314879264984	-539.762899203544	4.96163791897129e-06	4.16605610405953e-06	15.203117377145	22.0061211661411	0.421551345960708	0.0333822558804115	0.000278331567624625	1.89536181814363	8
68	1	0.000283668428645746	0.000320961666087194	-1150.94930302584	3.84905880894186e-06	1.04927521204823e-06	4.56491112239089	131.4705004706	0.396811619815655	0.0245426754939615	0.000152835143554712	1.67478138866956	8
69	1	0.000477479778429072	0.00035418785984517	-1325.79472982761	5.77629075232616e-06	1.37779367985848e-06	5.56305253440318	143.432489944664	0.348386023771156	0.034062612972491	0.000269938545052503	1.79553614029753	8
70	1	-0.000103894800787347	0.000277878921893498	-877.758592120652	7.34852081810389e-06	2.57435666063497e-06	10.8993275057362	69.4999766384477	1.3407130619695	0.0169977198054312	0.000202063693370073	1.90798073335294	8
71	1	-0.000471834974556918	0.000152896875431407	-341.592269271872	6.25147763997132e-06	1.95884253067207e-06	8.35296378776943	17.9547797431728	0.309670959000204	0.0284181092622759	0.000342491690636116	2.04237172096103	8
72	1	0.000541421106743737	0.000372782326138815	-1407.3680395309	1.97760565432058e-05	4.99937416621804e-06	22.1775410824901	145.451591268427	1.04133588510734	0.0376631335853119	0.000947293482171027	3.03978207473248	8
73	1	9.2281282799357e-05	0.000264169932884445	-900.931063470191	8.1870943538968e-06	1.95530666807842e-06	8.69442512939466	109.255608326566	1.58807651823761	0.0160327458180234	0.000187395143209074	2.41076727772279	8
74	1	-0.000530966764797509	0.000111514601337405	-183.327296117037	6.09173270569419e-06	2.02718094716086e-06	8.63349145094074	11.8609759916257	0.247744623776715	0.031085859576109	0.00034241161916788	2.26949455951499	8
75	1	-0.000141245208464589	0.000250497686254574	-778.106720388899	1.0820687824895e-05	1.6765671602324e-06	8.66719736164544	60.5831600402595	1.88508305988132	0.016476825295058	0.000315796320977386	1.92350610290052	8
76	1	8.15982607972187e-05	0.000266062743704534	-900.319372236005	8.05766310864384e-06	1.36585961903828e-06	6.54830237561971	107.050150184546	1.58815754620842	0.0159450825203464	0.000154666269792328	2.32132337530333	8
77	1	0.000305537791326352	0.000364519950403121	-1304.71163654656	2.69674099761883e-06	1.14897411080585e-06	4.27635250016288	129.96947734191	0.264363543617097	0.0272518448925041	0.000111341963473931	1.51044088068002	8
78	1	0.000276492493086968	0.000302708872774272	-1086.1119349452	8.73257587986021e-06	2.46304764629642e-06	10.6829968939131	132.408391168858	0.930521209253762	0.0234899239116828	0.000353156140947591	1.56904127855797	8
79	1	-0.000419300303121856	0.000237726974761524	-644.113833845342	5.10853062598589e-06	2.47763973232456e-06	9.64114871840603	29.5515514540649	0.394133586680566	0.0276167334948241	0.000264071677384965	2.32800261640703	8
80	1	0.000221075960142072	0.000291520478687945	-1032.25281973301	7.13853900006608e-06	2.28657560132457e-06	9.74510625260195	127.175036438907	0.916649808058732	0.0209626424709484	0.000268285588904483	2.05033362401646	8
81	1	-0.000207501271633116	0.000161217920585855	-455.90105753928	4.85249999055572e-06	1.61945328075028e-06	6.68522731698352	37.8453872643954	0.706512481358664	0.0150556032050133	0.000226810552795802	1.98079819338935	8
82	1	0.000429050210638095	0.000356847125010459	-1319.18088002712	1.65681207343402e-05	3.35875827600134e-06	16.3067418099531	140.249223925014	1.11958790203301	0.0319741195621077	0.000740141888412019	1.99940188416721	8
83	1	0.000664581460237398	0.000422020265875578	-1611.17208453399	9.60267448594071e-06	2.67093436914365e-06	11.8129816802057	147.583774468547	0.409005802910785	0.0451063499941995	0.000471648502792502	1.64919208168846	8
84	1	-0.000391753761050908	0.000166183735883029	-412.031281630578	1.0643992175455e-05	3.74907712077871e-06	15.7583894349232	22.986878723683	0.727437649756491	0.0243818971166263	0.000567662055137143	3.11890196898209	8
85	1	-6.73707680280756e-05	0.000291130809380599	-938.365392937061	6.05562073111686e-06	3.06367907935487e-06	12.123619582265	76.9704960149798	1.13892150551166	0.0171213713035741	0.000188057331822929	1.6329509792303	8
86	1	4.32768520257168e-05	0.00030083600627884	-1003.58206239217	3.61798992373041e-06	9.95510727890444e-07	4.17059140303181	98.1861405370102	0.675622988540792	0.0174140701065255	6.37077022243821e-05	0.985530353599553	8
87	1	0.000434354724434438	0.000268583068608942	-1026.36205034874	9.96594824493974e-06	2.0905843572724e-06	9.24756275807015	148.269442457767	0.620962519379474	0.02926018921832	0.000489727352607098	2.53984639361485	8
88	1	-0.000799943993171166	5.31419668882781e-05	98.22373194014	1.12338731616397e-05	4.42060372029526e-06	18.0003796361942	3.80069495145986	0.319693980772906	0.0459344300563203	0.000642456904564316	2.66733297484447	8
89	1	-8.21402989701462e-05	0.000226992459429129	-716.786079143301	1.03142387559113e-05	3.29392240402571e-06	14.1608448776829	70.1066561123087	2.31732849901937	0.0138310401360684	0.000268197947408508	2.59335255168961	8
90	1	-0.00034438162050921	0.000235740862394564	-661.938845775252	7.27774493366521e-06	2.12794627067817e-06	9.35295120911047	34.3929592461722	0.613713655575774	0.0239118040760502	0.000350912580827782	2.51400911758771	8
91	1	-0.000475368322155745	0.000125439440047457	-248.263912268243	6.26602076958893e-06	1.35874040442686e-06	6.36754785309617	14.7821650747892	0.241155414715918	0.0281689067332991	0.000347701856482659	1.52173230389706	8
92	1	0.000384343151387995	0.000386369775533375	-1402.26528389335	1.14589220415931e-05	2.88342365308864e-06	13.2176979691243	134.849338529945	0.880455803671062	0.0312249488861482	0.000477611305660461	2.05836694911906	8
93	1	3.33590622634093e-06	0.000246372997596933	-809.529795948933	5.89618469040517e-06	1.69467504200785e-06	7.48562900014801	90.7757411339629	1.37095840658688	0.0141174265896211	9.71964957775469e-05	1.50568108100654	8
94	1	-2.1186943854556e-05	0.000188269667453583	-607.516833678302	8.84876348071408e-06	2.37260367986893e-06	10.5725008263788	83.5792279311239	2.66046190090406	0.0108551467938867	0.00014650318201159	1.8616226054499	8
95	1	-9.49791444022594e-05	0.000276009130595373	-876.315699606695	7.73806608394334e-06	2.73693137439372e-06	11.3399564661036	71.0108426383237	1.44684349226641	0.0167242909162155	0.000206879946311167	2.47688560882489	8
96	1	0.000371589092538118	0.0003378715969251	-1236.2951421396	3.56019164329119e-06	9.6471447889002e-07	4.16489704532174	137.720964954593	0.285113454069731	0.0287756966696691	0.000155436505304013	1.57257776946924	8
97	1	3.9098724753661e-05	0.000164682725860027	-548.385954572619	7.02024834647187e-06	1.57961070091033e-06	7.16282215158706	103.355797760867	2.31542557719939	0.00969791109659468	0.000128012227989735	1.73038199803409	8
98	1	-1.72212810421575e-05	0.000221203722075718	-721.182611676258	9.437165351179e-06	2.71188683595263e-06	11.146494663929	85.5483549462677	2.43027879517395	0.0127123903357358	0.00016049535331168	2.56813979937828	8
99	1	0.000266240834113395	0.000330929206699891	-1177.02212531065	1.98242149543989e-05	6.8396165468548e-06	29.1618769464721	128.817548596701	2.1624116970165	0.0243354203821582	0.000774703125627599	2.53508377112418	8
100	1	0.000230165735458304	0.000394124610142386	-1377.67546161795	8.35673370764412e-06	2.60213058551994e-06	11.0883859625745	120.284599142383	0.920758970713407	0.0261503891545658	0.000273638243926962	1.83377133539587	8
101	1	0.000307690029782465	0.000246859556442497	-912.420772694036	1.32858467390142e-05	3.05380744743868e-06	13.8067664162827	141.25994551117	1.25616296641204	0.0226019162462308	0.000603760187652323	1.90435975439451	8
102	1	-2.32329131395153e-05	0.000350421668127392	-1150.86600051496	1.22105521180324e-05	3.44362818842575e-06	15.1430743323705	86.2068482429366	1.98809920776969	0.0201217608726552	0.000202240222017804	2.03775760701765	8
103	1	0.000141647486881006	0.000240040065960651	-834.622566771444	7.35048663794529e-06	2.11608163889217e-06	9.36037214229995	120.544827150913	1.31999736365203	0.0159693153651403	0.000238146790107508	1.38389781475061	8
104	1	4.4291235330323e-05	0.000277184542030219	-924.210814342841	5.89963185748074e-06	1.46720615050715e-06	6.18976003245371	99.0785280994527	1.19006764216342	0.0160829752945233	9.86695229967633e-05	1.57679733172823	8
105	1	-0.000114393669329081	0.000226105033745577	-705.150836955515	5.0660212850529e-06	1.95673068470173e-06	8.01225313046115	63.1637123434911	1.04145137402111	0.0145185057934896	0.000164857965118124	1.48659694180842	8
106	1	9.85571447735266e-05	0.000374804016827301	-1271.31855792982	8.05010224095507e-06	4.20207465027238e-06	13.8671358658714	104.732769484505	1.16181193219665	0.0222047238896437	0.000260721601365074	1.76865595508827	8
107	1	4.08777353898254e-05	0.000295277126840017	-986.996500650767	6.45303895697172e-06	3.22738196181653e-06	12.6827073089687	97.8818465861966	1.231547033332	0.0170794832044692	0.000190056126523528	1.89815327092149	8
108	1	0.000359213037460101	0.000260533663983567	-975.075815396197	9.4931391424183e-06	1.6244858759516e-06	7.94777643326893	144.046994316745	0.739414263111171	0.0254248542088362	0.000443678177485091	2.1735626973936	8
109	1	-0.000279684653039886	0.000257227947884388	-752.549567727753	5.26866932223636e-06	2.3356258628452e-06	9.3540597095065	42.6049641671739	0.596992656255773	0.0217716203237899	0.000239947210396172	1.8574778177451	8
110	1	0.00077157681841821	0.000526876516391835	-1994.90127278074	1.4072706873836e-05	4.71375562004961e-06	20.1862948259296	145.672517140467	0.542060891176343	0.0535318347476732	0.00068306592525568	1.8975366263086	8
111	1	0.00071486474651403	0.000391241955832575	-1527.95378770186	7.86626213746984e-06	1.93722285829457e-06	8.77519245813525	151.308329267626	0.291165860311702	0.0466917217784157	0.000398939129979544	1.80362304046233	8
112	1	0.00056574030756733	0.000348435591904425	-1334.09136277751	1.60316751049146e-05	3.7984204210293e-06	17.409329791527	148.371368062575	0.776770574656921	0.0380691254319743	0.000790393833661706	2.57309515606498	8
113	1	-0.0003278890927364	0.000262131268793487	-756.069260624089	7.39440059885948e-06	2.24880498119284e-06	9.77332756248886	38.6406236147408	0.674260854778318	0.02405222218988	0.000340557935531294	2.42402992348372	8
114	1	-8.01377344259214e-05	0.000391255644273281	-1267.89957601901	2.91062335793598e-06	1.34287348591516e-06	5.11392414709241	78.4246655499904	0.410894966944497	0.0228826904742334	8.24700749863208e-05	1.7950576579379	8
115	1	-0.0004436491640115	9.63296813081915e-05	-162.479369806752	5.24172990272065e-06	1.96598385803689e-06	8.12516089601747	12.2504939918363	0.280168794317414	0.0260115241576955	0.000294461852718551	2.05757354094095	8
116	1	-0.000357459563452863	0.000290201703578576	-839.993872240946	6.33492569489584e-06	3.95339331166329e-06	15.155546192936	39.0712407118308	0.626701396620228	0.0263806057661213	0.000315894673569409	1.9944982207565	8
117	1	0.000110513705189023	0.000402379756427915	-1367.68522181857	2.89664167164124e-06	1.13778068901678e-06	4.34905032977451	105.357619894403	0.38575417871608	0.0239083917184928	7.6705108448079e-05	1.53609008265615	8
118	1	0.000449114944259197	0.000445740736470048	-1619.46814872	1.38250055127612e-05	4.37852548839002e-06	18.9696206289887	135.216042601557	0.925646959706441	0.0362546455335462	0.00058933782551207	2.35928787160076	8
119	1	2.77677931628128e-05	0.00029160470148298	-966.444802390351	1.32830914488715e-05	3.30978433619155e-06	14.5038090339621	95.4395369623947	2.5871953097081	0.0167832969233643	0.000202098629460637	1.77715903589158	8
120	1	-0.000158324751948363	0.000237160355964791	-727.141887043223	6.62021219505107e-06	2.97990776833807e-06	11.8213539036393	56.2735117079531	1.15519621027016	0.0163380155742914	0.000254004488326075	2.33685637173269	8
121	1	-0.000496300891158633	0.000171221789608261	-396.010485190451	6.14547981325142e-06	2.5822062063898e-06	10.4002051161365	19.0342261813681	0.3446888349604	0.0300806348450635	0.000336337041103919	2.53643528150275	8
122	1	0.000132199506957489	0.000243704697186094	-845.360528941182	7.23104124425979e-06	1.93516022406249e-06	6.41859235201473	118.477961759591	1.32729262547752	0.0158853708582569	0.000220283508085751	1.69030393452879	8
123	1	-0.000288921709888259	0.000233267880710647	-672.710447577173	9.87962997114698e-06	2.79274694164167e-06	12.4292767558556	38.9165050576838	1.01460243479771	0.021275925487231	0.000451755508065281	2.09844869849794	8
124	1	5.57983287881373e-06	0.000268068509598372	-883.954283672066	7.07907580867143e-06	1.96373574594103e-06	8.64102511878577	91.1924366475915	1.51242035147516	0.015362520767809	0.000112805630824258	1.68799267848854	8
125	1	-4.68131646208563e-05	0.00011350256367953	-348.225452647588	2.05005174734722e-05	6.29935459640723e-06	27.5598047698776	67.5867182790955	8.91488722731098	0.0070346300767028	0.000558483070242888	1.90671670969957	8
126	1	-0.000171228612179495	0.000230307025095108	-697.261873909198	1.15129354054316e-05	3.60198497730929e-06	15.6149228694274	53.3699441539851	1.89382059855761	0.016443046147316	0.000427000737835006	2.02777026072457	8
127	1	7.89031768010131e-06	0.000292318232807616	-965.875249443955	8.0460808526192e-06	2.20307956143086e-06	9.86688040280723	91.5461647846095	1.57596539837143	0.0167547007743849	0.000126792836050892	2.32022099171589	8
128	1	-8.18172870561986e-06	0.000337109283108786	-1109.85114217059	1.39450027172621e-05	4.35213302963002e-06	19.0022143555605	88.6096896881248	2.36879369299893	0.0193206262736965	0.000250038067234273	1.78130622469179	8
129	1	0.000116421901402274	0.000295377274484078	-1011.65567759843	6.57303173221888e-06	2.19991644063686e-06	9.26949761633891	111.511702839205	1.11312374926859	0.018191007265159	0.000181169750185966	1.76691611847342	8
130	1	0.000228618343847212	0.000334514124108584	-1177.57176118794	1.05335279155988e-05	1.27475236705002e-06	6.67568468321242	124.350031140769	1.23397958122255	0.0232147642590235	0.000345835813771506	2.00772370145935	8
131	1	-0.00047348037404629	6.62108582461523e-05	-49.129440603184	1.27280732861093e-05	4.76266895351072e-06	19.3983144200588	7.96054346196055	0.603460059791826	0.0273923869903001	0.000723225341222708	2.18399738365494	8
132	1	-0.000392788373767089	0.000140735411717659	-327.418594806654	4.79336170383393e-06	1.42603767596744e-06	6.06414390101697	19.7125163070698	0.288579165113369	0.0239060858889104	0.000260009324197813	1.62674390006147	8
133	1	-0.000143681101206311	0.000230570204168885	-710.15038572902	7.59345985301686e-06	1.91472722022846e-06	8.56187461528808	58.070674040147	1.37583073628677	0.0155657854268156	0.000248222175430462	2.53923832771935	8
134	1	1.93469757217244e-06	0.000250544004516798	-825.524175826406	4.45017067153417e-06	1.14736162015318e-06	4.72579936267446	90.4424284768558	1.01763081620596	0.0143555417334085	6.57664920553867e-05	1.54478085988928	8
135	1	0.000231267752281023	0.000337707990041902	-1191.07901791423	4.87959331453643e-06	9.92449926241102e-07	4.45727894047565	124.40395772558	0.569014714321752	0.0234515090887442	0.000164789226109875	2.17154084253534	8
136	1	-0.000499300811991214	0.000142351504265648	-298.073017527986	5.84893298099948e-06	2.15987573964353e-06	8.87041028833687	15.91294038435	0.289584537890874	0.0297477790975336	0.00032405829102476	2.68234608920478	8
137	1	-0.000124312873275032	0.0001899998136548	-579.851915891507	1.58208852732989e-05	4.76783416261916e-06	20.9356509658038	56.8041218803342	3.40509905461907	0.0130092484283466	0.000546410619453957	2.77196673315031	8
138	1	0.00102470250556305	0.000500523307084095	-1990.9967967475	2.17192713244285e-05	5.35372922208583e-06	24.2283329914448	153.966471158883	0.53645434526075	0.0653407479877046	0.00112623448762978	1.85861047518067	8
139	1	-0.000574719036094302	0.000147297590682777	-290.354627934191	4.95983258040205e-06	1.83836091783953e-06	7.44865939784619	14.3751957899845	0.209086263698576	0.0339932758950283	0.000276519286515426	2.20785420794568	8
140	1	-0.000333344894684566	0.000154203122918999	-392.215439256681	6.2669466218863e-06	2.15990551626227e-06	8.96061959710407	24.8249460327418	0.511852806657422	0.0210438131762203	0.000330005520845179	2.37433096872033	8
141	1	0.000650137210277179	0.000334811981908685	-1316.95606510758	1.85340744959595e-05	5.12160658508167e-06	22.7039604421707	152.752137275034	0.754512861981619	0.0418995250730632	0.000953598274834476	2.08204946423776	8
142	1	-2.07051139163435e-05	0.000266128925925458	-870.364691489608	4.26476384255582e-06	1.15170874761468e-06	4.99969645013174	85.5512889045247	0.912852293347006	0.015294142621002	6.84650566919104e-05	1.72767183667262	8
143	1	-2.83299902128507e-05	0.000195384139467871	-629.923441003003	4.99986088180742e-06	1.46370338892518e-06	6.07919694678357	81.749816691945	1.43729601251907	0.0113117526107658	9.2618409730048e-05	1.76820724846315	8
144	1	0.000562239013770674	0.000359538370812463	-1372.84467834429	9.76363493490527e-06	1.86058288772123e-06	8.66014677308374	147.402059835696	0.471218975742816	0.0382373856220397	0.000474777613632729	1.79111508899632	8
145	1	-0.000164468134957515	0.000181223345991663	-536.89667382505	7.10670547731658e-06	2.27909121594507e-06	9.52763802815881	47.7748794439619	1.28320194675224	0.0140218665641498	0.000290228653720803	2.12547707358848	8
146	1	9.24691460987182e-05	0.000529063687449472	-1788.90663304896	3.71984347070883e-06	3.45425484827586e-06	12.4122663242985	99.9139509402491	0.396020045387918	0.030772627763497	0.000198382022448887	2.35093840112331	8
147	1	-0.000232150656601633	0.000204936803782828	-595.119609167177	9.28792594058024e-06	3.67043900030987e-06	13.6119772976564	41.4372604749724	1.24605550716181	0.0177425532824884	0.000422529024969001	2.06832347763398	8
148	1	-5.03818252045922e-05	0.0002344663056203	-750.705980212776	6.93044089311918e-06	3.20399108354274e-06	12.3101160009551	77.8727605081534	1.62679188383338	0.0137405713728356	0.000197918042473201	2.76118247161452	8
149	1	-0.000263765367381175	0.000268965793017045	-799.764755422928	7.32870647725883e-06	2.81181445358146e-06	11.0854374978055	45.5592933147263	0.850295745743439	0.0215842223311711	0.000315704563181161	2.71694975182121	8
150	1	0.00074332268221397	0.000216555926922731	-953.095049306489	1.73540911932082e-05	2.30340353022179e-06	11.5060025881782	163.757309164811	0.394743199113565	0.0443598429996257	0.000955341470995053	2.20706533092459	8
151	1	-0.000369611781160862	0.00017632281045438	-454.066823261914	4.64086647846739e-06	1.56958255678543e-06	6.55078841914346	25.5034139346552	0.342701359344867	0.0234634845398887	0.000243096014506863	1.81112766733011	8
152	1	0.0002686002800215	0.00030099400844243	-1078.61375272303	4.28709356927564e-06	1.21375692059942e-06	5.22937175508541	131.745004635556	0.468571853537843	0.0231139643626648	0.000171579732375806	1.80491562656515	8
153	1	0.000293873366907565	0.00024582866088267	-903.437884052175	9.36931327545288e-06	2.27643329654841e-06	10.4245338408309	140.087106447283	0.936146833504385	0.0219520815415706	0.000420172048760372	1.7083157894288	8
154	1	0.000338114613021416	0.000355931985715302	-1286.23797240253	3.54529402843235e-06	1.02040923554506e-06	4.02545239290743	133.529441558873	0.311002001741074	0.0281280283313663	0.000146182001521121	1.63457091084437	8
155	1	0.000125666480643523	0.000244741842897971	-846.238669363997	1.0522510588419e-05	1.96677055440913e-06	7.60227771145231	117.178931877997	1.95838918838675	0.0157631748345182	0.000293063162398633	1.87661075256949	8
156	1	0.000377362022346887	0.000333607743087033	-1223.60554847665	6.54099966528558e-06	1.64781886247831e-06	7.52022719393134	138.521637524268	0.512439508055408	0.0288588882116585	0.000287660258097903	1.55652272624041	8
157	1	-0.000165534366524211	0.000228202615462587	-695.548110798351	3.45693723163931e-06	1.43981629329116e-06	5.66048668217013	54.0434956433396	0.594094035632194	0.0161527417543539	0.000134107366033232	1.37895071817669	8
158	1	-0.000218969180148953	0.000227655607005723	-673.397829508427	2.42588154577567e-05	8.48633264447394e-06	35.9815937404412	46.1142078827864	3.34611235603706	0.0180980826191899	0.00102527883630632	2.86675321417271	8
159	1	-1.50064106086119e-05	0.000262407904180935	-857.30724029568	5.89881111669866e-06	2.28920777346977e-06	9.3342607744968	86.7269715735938	1.28410087334654	0.0150594299412319	0.000132362111416801	1.98693316470376	8
160	1	0.000263826372423836	0.000347170958002913	-1230.0377778897	6.05103936084059e-06	1.9838101418303e-06	8.49350381112937	127.232369691716	0.652405366234243	0.0249833255018928	0.000228458445078941	1.32809535842006	8
161	1	8.77047394909607e-05	0.000250740743945751	-853.413701416552	1.20987063714043e-05	1.96525394836891e-06	8.45573682239057	109.278946710646	2.4672266207032	0.0152198814572557	0.000252348918186629	2.16183944949609	8
162	1	0.000289074758330134	0.000536152052563239	-1877.86636656542	5.71533660553429e-06	3.49774291120622e-06	13.1482844157835	118.332020396835	0.498302439048363	0.0348998158336542	0.000235092640041516	2.25208027247455	8
163	1	-0.000512618542766364	0.000235778771250483	-608.80989621785	1.21220135418607e-05	4.57862175137804e-06	18.7587437110862	24.7000539533354	0.665574530961214	0.0323287003151336	0.0006404463934253	3.07478161221106	8
164	1	0.000386506560335223	0.000303307773694071	-1125.12161073443	1.38693223777577e-05	2.31301337171951e-06	11.8818779376545	141.877248114244	1.02081511124604	0.0281498361951833	0.000630476796050376	1.32176667685331	8
165	1	-0.000315143522689572	0.000256781907527335	-743.564677606842	1.31384686728381e-05	4.17022023575589e-06	17.6828370278305	39.1734718312676	1.25534286973639	0.0232914475521966	0.000602783004423321	2.71336401345768	8
166	1	5.02420353132245e-05	0.000274875480298477	-922.60918451663	9.84113830416163e-06	2.3698759848108e-06	6.97611450114347	100.358241594837	1.98691852036429	0.0160101250963294	0.000167689060485689	1.67246105543798	8
167	1	0.000338290110097902	0.000433414831390626	-1543.23503167388	1.26357031538629e-05	3.21589615227596e-06	12.5544611639531	127.9728458606	1.05829874351703	0.0315016631938647	0.000468534553651616	2.21310952806598	8
168	1	0.000239074985050847	0.000314016941401253	-1113.92007036029	4.96678463466027e-06	1.48435844322309e-06	6.41016163659953	127.283622386444	0.588363921416852	0.0226128572557229	0.00018519036773184	1.46396672988782	8
169	1	-0.000156166873249013	0.000236527836052265	-726.780463627932	8.24795427765152e-06	2.44722375129489e-06	10.5986441555774	56.5653186571522	1.41785517551286	0.0162394378137378	0.000285464689035454	1.81020447882426	8
170	1	-0.000225410872476143	0.000227512331225264	-669.782566158294	8.99725023708077e-06	2.99445636011847e-06	12.8468497824626	45.2658372372413	1.20398787140247	0.0183500336563327	0.000382745458390901	1.81308391883498	8
171	1	-0.000162638643279258	0.000218142088133366	-662.11908945053	6.2385788578376e-06	1.7878906062627e-06	7.72291962530043	53.2931553009094	1.076939258374	0.0155900642569691	0.000228892368330949	2.14134518365976	8
172	1	0.00048584120623976	0.000322110912349747	-1220.3913336984	6.91261502071203e-06	1.61510639655822e-06	6.99140783372482	146.455769907823	0.398080671512963	0.0333989203796534	0.000334040016809443	1.98919283074389	8
173	1	0.000286986248663371	0.000313451277866233	-1127.30591078621	6.60446669402717e-06	1.71266312214315e-06	7.7611500774894	132.476250869099	0.674978555566237	0.0243498831747502	0.000265584889544511	1.55728213737641	8
174	1	-0.000325572348289532	0.00022760164507423	-638.983338847474	8.33018537228948e-06	3.13744682457759e-06	13.0674045874641	34.9566900424443	0.781960367147735	0.0227601919205824	0.000404507514080125	2.25335882281671	8
175	1	-0.000107769287897444	0.000356644279802784	-1142.39513907453	2.55424383830044e-06	1.20154649793518e-06	4.4831720785264	73.186451029071	0.379791626637292	0.0213467611639544	7.83255726268423e-05	1.57223207539591	8
176	1	-0.000417209133631141	0.000167163806326737	-406.807650105343	1.07801817311956e-05	3.62717863376752e-06	15.475813226876	21.8345687838245	0.667438206665553	0.0257517072744804	0.00057853564207871	2.64872676557364	8
177	1	-0.000502102331416659	0.000128339430108586	-250.036236082056	1.21988154446214e-05	3.65835078568518e-06	16.1043190430482	14.3380479366647	0.514880024143923	0.0296932419825851	0.000679156063527822	1.63553799017518	8
178	1	7.91803148460663e-06	0.000243856968261816	-803.209502583852	7.72465355320809e-06	2.471796171439e-06	10.0766568582066	91.8597395657068	1.81314391910735	0.0139793382245159	0.000142275756678107	1.50868425499167	8
179	1	0.000269851486608478	0.000343881195648604	-1223.48350420867	5.76915638062191e-06	1.80986537012743e-06	7.49187214451089	128.122092922253	0.612658070553236	0.0250451431330418	0.000219762878981889	1.4138019113012	8
180	1	0.000122125837294543	0.000356520622241516	-1216.88062109241	5.63316733309718e-06	8.8019376801295e-07	4.44871282257206	108.908852593875	0.81138413250814	0.021592350725399	0.000114961168453558	1.56703063176911	8
181	1	0.000226140069309781	0.000292174318520048	-1034.58897680165	1.02374228933656e-05	2.99949997034669e-06	13.2727963633519	127.739521186439	1.28734724158655	0.021168844474289	0.000383880679719329	1.54940848847684	8
182	1	-7.56781092378298e-05	0.000328381970956008	-1057.91624032883	3.52266479847908e-06	1.05564342402265e-06	4.46383061689804	77.0223386394383	0.585024224936056	0.0193080729800954	7.4352251477582e-05	2.16900434333038	8
183	1	-0.000209262235971805	0.000170628286958559	-487.518666804596	5.52668335635158e-06	1.57784216229618e-06	6.84760927814592	39.1931216552619	0.785225800695551	0.0154703583035314	0.000251976313969401	1.73707700917664	8
184	1	-7.96218576558148e-05	0.000198475527641767	-624.131767080196	6.52763943603427e-06	1.4360562389554e-06	5.78836078369019	68.1409658093484	1.62947874843032	0.0122527495366	0.000158815939451382	1.69581811618293	8
185	1	-0.000362519421916894	0.00016824045603192	-429.531810028172	8.46468090459972e-06	3.01042949657766e-06	12.4086951163305	24.8953893056865	0.643599353386183	0.0228986197860195	0.000445875957005991	2.81877839822704	8
186	1	0.00038540724226127	0.000474651445865483	-1696.44095085801	1.03198192438755e-05	3.15403968779112e-06	13.722463017913	129.075890563394	0.773516782511742	0.0350317024773403	0.000398242341371007	2.09052532445021	8
187	1	0.000236036937127204	0.000324340436034661	-1145.60178064401	8.69672189594337e-06	2.63039115336349e-06	11.4240195279345	126.045045264787	1.02841776812278	0.0229834031110272	0.000317516063149125	1.59723107085746	8
188	1	0.000115779899024772	0.000302949743692906	-1034.83915083689	3.93434280227558e-06	1.37819759165397e-06	5.56876657222748	110.91561963963	0.655050934835382	0.018582172724706	0.00010916411807283	2.25945251296631	8
189	1	1.01807474111619e-05	0.000202856675580888	-668.294468141632	7.9491631025405e-06	1.7732478208289e-06	7.78178116018769	92.8730869238751	2.2396979792158	0.0116374593480941	0.000104008236321369	1.98392273803441	8
190	1	-0.000328711517616869	0.000178830217676626	-473.841634900403	1.85010839649751e-05	5.91791728080606e-06	25.7307041118859	28.547690672663	1.57039192645321	0.021440528979582	0.000945148389862458	1.84230569093764	8
191	1	0.000388843039573833	0.000324245176416549	-1196.04015423611	3.99121970281412e-06	1.34769077561767e-06	5.30010739031465	140.176232058654	0.312080899844534	0.0290085198989232	0.000182459601239616	1.83947671746875	8
192	1	0.000203308867572167	0.000381661473608422	-1328.38497605942	2.3260782944481e-06	1.48680310304738e-06	5.23367616154308	118.043970930325	0.287344683656	0.0247766953562518	9.78722487302447e-05	1.19446017312322	8
193	1	-0.000229976546376652	0.000250052732911625	-744.37676708696	8.15960236356546e-06	2.59108332703147e-06	11.0746821339969	47.3948763933029	1.05519540441558	0.0194650192414656	0.000334810547402578	2.29984577682912	8
194	1	0.000576951505463396	0.000301635562763825	-1184.16429821218	1.71487054948583e-05	2.09317294162945e-06	12.0236384451688	152.399016935696	0.718029132338066	0.037302013737758	0.000872500884680761	1.67137559303244	8
195	1	4.42727844866908e-05	0.000195775346372687	-654.283701475458	4.96250823382795e-06	1.48397688620078e-06	6.38971142033057	102.742579244743	1.38482924579883	0.0115003440912744	0.000103975116457255	1.44400522656802	8
196	1	0.000244974666940279	0.000369953585108479	-1302.50129192825	5.9344821611136e-06	1.07899461378417e-06	4.23616261100764	123.511600310686	0.643546527224373	0.0254226879006012	0.000194675402702368	1.38595346913636	8
197	1	2.99364729257029e-05	0.000313047797728421	-1042.41361222083	7.8870015387706e-06	2.11027435318251e-06	9.06074620840591	95.4625316290812	1.43091054226658	0.0180181434392637	0.000127817164866538	1.79504414825346	8
198	1	0.000195873552268307	0.000363983000906162	-1267.3348454945	1.12907758549223e-05	2.32187443308711e-06	10.6882622195714	118.286440239107	1.38661385644001	0.0236826443150164	0.000328180256795936	1.67927384018928	8
199	1	0.000490154828150763	0.000252731116794874	-991.671333082877	9.93554628038101e-06	1.89423565010269e-06	8.02879882284163	152.723695233914	0.504368724560593	0.0315971918628293	0.000508405183325772	1.89124453429177	8
200	1	-9.40358230601326e-05	0.000225361843570127	-709.007102587813	4.87514422530642e-06	2.40187101904214e-06	8.87109452948377	67.3508843718402	1.07772774252984	0.0139912837495331	0.000166433578424613	1.81619276003151	8
201	1	0.000897278700381623	0.00043197375988952	-1721.20175569661	4.10295915063501e-05	9.4832893433755e-06	44.5206347562447	154.292602813898	1.13587999011504	0.0570577867675013	0.002131211172525	2.54451683436463	8
202	1	0.000129421230012874	0.000316793867482515	-1085.43026008215	4.40181362284881e-06	1.35152437806537e-06	5.48951211207033	112.221709724695	0.687596607606636	0.0196072319002667	0.000119316725587726	1.939123267592	8
203	1	0.00026093766012907	0.000252141140355618	-913.872203511436	7.66261680668954e-06	2.25675839260138e-06	9.75003933147464	135.982215760952	0.878956337282777	0.020790048600503	0.000328257255688127	1.70065759786588	8
204	1	1.9911713677104e-05	0.000269070591245513	-889.388815368283	6.93790551355355e-06	2.42221498504125e-06	10.2822973176389	94.2322775607825	1.46979868101559	0.0154587640134878	0.000141479181661891	1.00494827498459	8
205	1	0.000318634748643589	0.000318787529293686	-1153.86975397632	9.58098688876329e-06	3.17954976837095e-06	13.3064618102506	134.986267053134	0.90756183796329	0.025824674459102	0.000408904141673761	1.71679950888195	8
206	1	-4.55914747976121e-05	0.000277466878310917	-899.895657456054	5.24798527709611e-06	1.40491993175031e-06	6.31525135678148	80.6689261054681	1.05621881333333	0.0161108607351252	9.31994081275596e-05	1.45196526118149	8
207	1	-0.000215561810178898	0.000206478073523314	-605.940299448031	3.86298846305099e-06	1.32334348164845e-06	5.42857256181895	43.7669899312703	0.544726470892444	0.0171025822610318	0.000168222598557446	1.57218777250391	8
208	1	-0.000178650841355816	0.000260139103719608	-793.997755401557	2.50653692560675e-06	9.1096291104571e-07	3.66522428625544	55.5206203667391	0.386648051032659	0.0180811963437577	9.19840940642988e-05	1.48299239319295	8
209	1	-0.00017687863719944	0.000199340619738913	-593.346071990172	1.06222183290277e-05	2.69359481304275e-06	12.1943212076656	48.4167598815525	1.7508978641963	0.0152693770422161	0.000420109372911709	2.03479794754997	8
210	1	0.000371865957813252	0.000346870142241053	-1266.84013387772	8.4250890778033e-06	2.27025188436119e-06	10.0826894948844	136.991798899161	0.673961472454599	0.0291366442017988	0.000363973133206794	2.1924527992572	8
211	1	-1.02331793601796e-05	0.000302624177464086	-995.419667666218	8.99673641923521e-06	2.39629578928818e-06	10.7903422678541	88.063291991362	1.70147399135799	0.0173489978841985	0.000138320602709593	1.9680236079774	8
212	1	-0.000141012116579737	0.000234431002478517	-724.634349588151	1.25914371223906e-05	3.58973795833795e-06	15.9626664281114	58.9727560550906	2.29276446025503	0.015674591045638	0.000411514759891154	2.2926652165186	8
213	1	4.6332606063362e-05	0.000224014971169857	-748.093638525606	8.68465622087683e-06	2.63031405641593e-06	11.298678961297	101.685611852909	2.13430668532545	0.0131067668834817	0.000178711591976814	1.17411651960303	8
214	1	0.000162223019133444	0.000311175753730788	-1076.7033611339	7.07432526309281e-06	2.45767178689031e-06	10.3769243252137	117.534058935518	1.04087641332811	0.0201063819799003	0.000225167063081065	1.50765006193525	8
215	1	-5.39486012611234e-05	0.000199892117623741	-636.815870332524	4.95384613760355e-06	1.64471713695955e-06	6.72841592175598	74.8963747795976	1.32883516920008	0.0118627599691195	0.000117247980041659	2.10524332979892	8
216	1	0.000292309508542969	0.000314933612369869	-1133.86464744949	6.20710913389162e-06	1.48173385486577e-06	6.85397282223136	132.866313604482	0.621355510118215	0.0246190574768264	0.000249812817238364	1.15682040090803	8
217	1	0.000153413469038161	0.000384891742081256	-1323.09313121775	3.23557769661424e-06	9.08294344894154e-07	3.6272643999082	111.73166349803	0.418217155120295	0.0237399118721555	8.39556988577131e-05	1.33512458191283	8
218	1	-0.00035732858480965	0.000232534452570576	-647.472384741203	8.8359648291772e-06	2.70581670092909e-06	11.7651113558697	33.0543898361373	0.715831291187015	0.0244268222135702	0.000432669788335735	1.41615204189598	8
219	1	0.000402750916352588	0.000450735634832092	-1623.30045838605	8.65519267014887e-06	2.93315311863829e-06	12.5080764604775	131.782104488134	0.639201728844964	0.0346329562893857	0.000353388040292049	1.57690689125661	8
220	1	0.000291013275744079	0.000365134030554302	-1301.46421154971	8.50595250875765e-06	1.1072908433355e-06	6.07970502726431	128.554984883857	0.820622340071993	0.0267523777978909	0.000307776654850689	1.81580050510984	8
221	1	0.000261622930948155	0.00010895283155299	-436.385215352232	8.9835731704936e-06	1.81548358895027e-06	7.33927807615845	157.390720647546	0.776103799104393	0.0162377970890759	0.000476843248699152	1.85445967962149	8
222	1	0.000104130182071531	0.000354826587176565	-1206.09839285748	4.85726292681164e-06	1.44013873871915e-06	6.13069134373943	106.355265882183	0.724864351360229	0.0211874330517787	0.000111400621667783	1.64839619996945	8
223	1	-0.000243336106859308	0.000178818980450293	-503.793251602298	5.07999457007076e-06	1.60408979248629e-06	6.72342726611743	36.3108323936792	0.621227990172345	0.0173018723588427	0.000240774378823363	1.83860432998775	8
224	1	0.000257835938985865	0.000347924324851236	-1232.24721240702	1.10816395207675e-05	2.97487334994722e-06	13.2630030645896	126.540998576892	1.20106759047829	0.0248118302424132	0.000402075892557121	1.88708605670927	8
225	1	0.000371372963024446	0.000268584164208008	-1007.38256227699	8.84681737747671e-06	1.51115716911197e-06	7.53680656213789	144.124812938371	0.66595334180191	0.0262596815977361	0.000413848992349295	1.90325843728153	8
226	1	0.00024358749402735	0.000368046982553474	-1295.04564635342	7.21705586581887e-06	2.2956938144132e-06	9.83821236119029	123.498106692773	0.798414942387717	0.0252877260232083	0.000253208767241087	1.57924787757735	8
227	1	0.000228810194286813	0.00034443992483848	-1212.47006524653	8.49908332788449e-06	1.76141145730013e-06	8.24691247886569	123.595944013364	0.99016426887638	0.0236925459606994	0.000282260317985921	1.97881764335041	8
228	1	-0.0001255548612361	0.000289672090076153	-914.993883111813	4.51045047056983e-06	2.45147616456982e-06	9.44749712204083	66.5662635140533	0.771606824903867	0.018088953273832	0.00016483676389079	1.90427138819213	8
229	1	5.85806697621943e-05	0.000338271854001221	-1133.92848569421	1.30478898103539e-05	3.764600355731e-06	16.5951666079495	99.8248291000358	2.14835211062943	0.0196700285419524	0.0002478770975218	2.14935659945012	8
230	1	-0.000466463667040648	0.00012131535336873	-238.060234572118	1.00111013842052e-05	4.5285909224714e-06	18.1794809467776	14.5782199468819	0.6009781596413	0.0276154799130381	0.000558955301911286	2.62040736558034	8
231	1	0.000313431760377436	0.000371763899431513	-1331.47338778869	3.65188405343173e-06	8.19848723665797e-07	3.60067611763478	130.134023213777	0.334822476793292	0.0278605892232804	0.000139569477767929	1.61439792968917	8
232	1	0.000282704131068946	0.00028185036709062	-1019.31102745137	7.69944592854947e-06	2.40271878154533e-06	10.2418343573833	135.086647144832	0.817549655315418	0.0228725181032985	0.000327179328527158	1.92127025421518	8
233	1	0.000298838852503166	0.000365357918060812	-1303.98940298804	1.39825968239949e-05	3.68430515358822e-06	16.7351600820331	129.280918298975	1.34397182990783	0.0270440349195553	0.000532891861893945	2.13374756421627	8
234	1	-0.000124080139802264	0.000279802305158715	-877.78827317118	2.64738458855311e-06	9.52591525907134e-07	3.82410374505506	66.0847983899387	0.458753683320244	0.0175371145454335	7.91860277492281e-05	1.64629510028201	8
235	1	-0.000149723274759579	0.000206464670317273	-625.809448914688	7.17126941422157e-06	2.69571322264334e-06	11.1984719472746	54.0512696190078	1.35181424335497	0.0146126386165406	0.00027169488456023	1.73756060834644	8
236	1	0.000135599335999963	0.000324276579907481	-1115.15126421792	5.19192467739773e-06	1.83951013523091e-06	6.99227688079309	112.692707058259	0.7893417531408	0.0201386693929351	0.000150417803503808	2.4838798118374	8
237	1	-0.000250367924829131	0.000253614003831948	-752.752027747539	9.77695781058459e-06	5.75994283538687e-06	22.3939454849744	45.3690292140383	1.294048432301	0.0204188645543582	0.000458297963980353	2.05692101669496	8
238	1	0.000224139913275422	0.000333100055574686	-1173.74878725569	6.84265124142045e-06	3.06378402405453e-06	12.2979150438367	123.936241334785	0.846133937004549	0.0230036903621169	0.00026289956169203	1.50241941764432	8
239	1	2.9074830645939e-05	0.00022315214837157	-740.996653875662	7.7144091817174e-06	2.2792628910688e-06	9.87053036817001	97.4233363003738	1.94910452120006	0.012893743396404	0.000141530165034194	2.27509897315746	8
240	1	0.000138578977362215	0.000360254554710194	-1236.72565928574	5.45795887202928e-06	2.07488570220185e-06	7.82738059688107	111.040217254696	0.764200440491274	0.0221155372480837	0.000157849579801096	2.62637202827612	8
241	1	0.000386315305070631	0.000289122963777268	-1077.16468044184	1.1534402658075e-05	3.00565205803803e-06	13.4903960445373	143.188382003984	0.868971481797363	0.0276467167418275	0.000539068947667523	2.24497754800587	8
242	1	-0.000509942509191688	0.000136863536606199	-275.908063855383	4.86544403136762e-06	1.77942647855536e-06	7.34918434909502	15.0235689329332	0.231327677065269	0.0302515714116964	0.000270534741484029	2.30520902525741	8
243	1	-5.70250523164225e-06	0.000336178627080544	-1105.2589625337	1.05821883943171e-05	3.3966783423851e-06	14.7069961583703	89.0282007110032	1.80305724812903	0.0192643866790831	0.000194858846940046	2.48552258286984	8
244	1	0.000262865422942352	0.000380448970973779	-1342.28609813694	1.26321971712838e-05	3.83394607938277e-06	16.8116784165687	124.641943473468	1.31569373916522	0.0264951705106569	0.000449369033659336	2.57612617751101	8
245	1	0.000332342208814631	0.00035439340629488	-1279.15997972475	3.07573780958132e-06	9.85054497596036e-07	3.99340978521587	133.16085468625	0.276257825590145	0.0278369051085576	0.000127383817149347	1.41489395190778	8
246	1	-0.000279509198598717	0.000185230688488226	-512.8305541693	2.45569709146213e-05	7.46134693832322e-06	32.3898218731915	33.5324281322854	2.54997507302837	0.0192121037456729	0.00119638578769289	2.676411700606	8
247	1	0.000324149699241731	0.000282916230233314	-1038.4622583009	8.14034089073932e-06	2.25678078142602e-06	10.0257783909824	138.885707535129	0.747920245468539	0.0246514781965459	0.000361531255782311	1.16495490666054	8
248	1	-8.0656356672526e-05	0.00027372400940204	-876.31178945294	3.72256334911683e-06	9.40029684651085e-07	4.21914990246828	73.5817016257088	0.718936692069454	0.0163499183240674	7.93940773540477e-05	1.24230811894051	8
249	1	-0.000345032740302705	0.000158387847939594	-401.021917940904	1.05412537411872e-05	3.31479007915558e-06	14.4068191797632	24.6575671166092	0.804483757967694	0.0217523551984584	0.000554587183444094	1.78356834026532	8
250	1	-3.85071490999265e-05	0.0003128372799103	-1019.12140732826	9.17323369790588e-06	3.7219731908437e-06	15.2071769594187	82.9827586839199	1.65705464482517	0.0180595313185847	0.000221181286373585	1.49370634877645	8
251	1	0.00031971951431453	0.000288582609826706	-1053.95412732338	7.46585509934884e-06	2.18553358626414e-06	9.52480644896519	137.930217585878	0.699591904571083	0.0246771577335778	0.000328437971491048	1.77076919664388	8
252	1	-0.000177759239986231	0.000279220022854759	-859.027925035439	8.48135909636541e-06	2.74325605888237e-06	11.7760355693559	57.5180344870631	1.2644200387439	0.0189650034651265	0.000292719635318869	2.1298116886923	8
253	1	0.000708922439337246	0.000550214053352041	-2053.49393880193	1.32646669113119e-05	4.28015138020112e-06	18.5251812102493	142.183985291603	0.562354219976132	0.0514165729087495	0.000618935996342765	2.11089929324344	8
254	1	-5.5713070701947e-05	0.000252232620493884	-812.018384511831	9.86634010437673e-06	2.4489376347315e-06	8.84864754181516	77.5445130313897	2.14013677235609	0.014800203900819	0.000183405755590629	2.29643629777241	8
255	1	-8.72541093538522e-05	0.000238347599073222	-754.602921158499	5.8239176812053e-06	1.43444500665327e-06	6.49812493025366	69.8933702271517	1.23955817609007	0.014542618629207	0.000138257295820497	2.07696142807949	8
256	1	0.000307704173510694	0.0003438112365295	-1234.41939976883	7.5325847702914e-06	2.28361876320054e-06	9.93392343129519	131.827905876038	0.72220492721168	0.0264361506352202	0.000303886942735427	1.77790665323549	8
257	1	0.000674316420468823	0.000507185799541087	-1897.3203252807	2.02992159875797e-05	7.09927390657756e-06	30.2137560594604	143.051415026446	0.913752677040544	0.0483441855253659	0.000961107811483047	2.43690475141404	8
258	1	-5.55413094425267e-05	0.000347755922879025	-1130.4448759198	3.5891329380127e-06	1.37608975556768e-06	5.43727692975958	80.9257302816544	0.577711665388709	0.020177472310678	8.43424857499787e-05	2.42656383172498	8
259	1	-0.000158342434906575	0.000246414289155605	-758.186507790776	1.77051848191591e-05	5.16385880128862e-06	22.8756009519532	57.2757573150123	2.96440018666635	0.0167821209651606	0.000602242385737558	2.90942109106507	8
260	1	0.00025642502687998	0.000302852705740582	-1081.5665542648	9.49570028352635e-06	2.36094723344158e-06	10.7604145481465	130.254549696139	1.06927585045817	0.0227366474015014	0.000366409851474879	1.67043084651512	8
261	1	-0.000114499492731085	0.000264805116418411	-835.082030220114	3.93322384736429e-06	1.09804121291038e-06	4.83399197138032	66.6167527118519	0.72218622990842	0.0165297955350638	0.00010646154073056	1.45841015149417	8
262	1	-0.000431464780665604	0.00015243436430149	-352.729022539751	2.36469194758126e-05	8.31078627381026e-06	35.2748479483434	19.4580615667179	1.39120245781499	0.0262185676876925	0.00128729593444861	2.57530686745163	8
263	1	0.000550468153776735	0.000241277023959329	-970.543397472217	8.34688763942001e-06	2.57291303775508e-06	9.29062431173434	156.331564338389	0.390515875214409	0.0344361316804793	0.000441993231819037	1.61555822471288	8
264	1	5.59558405233598e-05	0.000305193657181667	-1024.32819984611	9.51479339907442e-06	3.14834787422189e-06	13.3180528711899	100.389524407071	1.73135135966196	0.0177777842915248	0.000202846570852102	2.64803204337873	8
265	1	5.90428584203347e-05	0.000291937923923634	-978.635695137872	7.59732181083133e-06	1.14956100017265e-06	6.0104627382921	101.433536716526	1.43313035391375	0.0170654693374956	0.000107765936125691	1.42740029940272	8
266	1	-0.000334318639583617	0.000204540700240561	-557.58392734799	9.73868388722649e-06	3.54014357419251e-06	14.8819728515805	31.4588630405802	0.864266063931612	0.0224556943994969	0.000487599318608435	2.06824221117703	8
267	1	0.000758189902284887	0.000412739727958167	-1612.18877356262	2.2419776219941e-05	5.06447891342561e-06	22.9654785822211	151.437226596539	0.770287801378778	0.0494607501946973	0.00113671733019055	2.76142859832476	8
268	1	-4.6818075657667e-05	0.000298035040902361	-966.340422257909	5.23574087740585e-06	2.79203272200557e-06	10.6206645597893	81.0724121325467	0.985745830578608	0.0172855595652948	0.000164747921817292	2.56036918538615	8
269	1	0.000556390055123039	0.000366113586342288	-1392.45106898155	1.32620109225715e-05	2.70885774207058e-06	12.0561429267803	146.654441856282	0.656633963906476	0.0381612654531693	0.000640469765684963	2.01498876714619	8
270	1	0.000360649296142059	0.000343757578234632	-1252.63801077802	2.8745373765554e-06	9.58332124316318e-07	3.76176599370638	136.373692861949	0.241622786094454	0.028546707000686	0.000125092607952972	1.46481415051237	8
271	1	0.000215620060656649	0.000298763981241982	-1055.56018926501	1.49935728452714e-05	4.4032187468106e-06	19.3857322003515	125.818248113107	1.93264366604324	0.0211103588000583	0.000542768893384939	2.85844806473673	8
272	1	-0.000616290142738771	0.000135858509270375	-237.456433064917	4.38108010200492e-06	2.04579885615829e-06	8.15834634824579	12.4317738240684	0.200576978973079	0.0361586291954268	0.000246427067579923	1.53456414641603	8
273	1	-0.000388406809436064	0.000157514688672915	-383.336377915637	8.88657551447693e-06	3.10278872270665e-06	13.0703657438344	22.0745466321442	0.602434453198286	0.0240144313068242	0.00047654591982507	2.38142824008434	8
274	1	0.000569890553102932	0.000326678793098675	-1264.19264782595	6.48164835782968e-06	1.70527339491362e-06	7.66083943184929	150.177338773208	0.30935918494435	0.0376365745346163	0.000325833266295196	1.1606842284634	8
275	1	-0.000407529474697346	0.00022479234918162	-604.28542104546	1.16918637388792e-05	3.96945374826094e-06	16.5540617188172	28.881030726729	0.816322270223907	0.0266663595088232	0.000596772902600002	3.20627133317744	8
276	1	-0.000220374011986497	0.000235581609416533	-701.667680309165	6.93362969441641e-06	1.92686073512423e-06	7.9639153704562	46.9102917544215	0.92923773574012	0.01848296420971	0.000283113137539536	1.88491786785401	8
277	1	0.000151326797276163	0.000332381781584989	-1146.93285989285	7.41184164473487e-06	1.89424657269925e-06	8.64844578761927	114.478827734833	1.06542711723367	0.020924920430474	0.00020179227761946	1.73430103983013	8
278	1	-8.73827920233609e-05	0.000238653735170799	-754.134715098257	8.8237089646006e-06	2.4961047275728e-06	11.0265774057885	69.889853296828	1.87795371515718	0.0145616245844167	0.000219660784215995	2.33321393826993	8
279	1	0.000254898192539834	0.000330087327977501	-1173.53768848509	1.50430678190241e-05	3.37244087183294e-06	16.0494079647915	127.675837238082	1.66006055707588	0.0238952055229333	0.00054854074272724	1.8730075613425	8
280	1	0.000366102671250125	0.000294380180141827	-1089.66518684965	1.25382793740571e-05	3.19098424236039e-06	14.0013296187717	141.197521533472	1.00511513500165	0.026916263449607	0.000571451816149694	2.1992228154296	8
281	1	0.000245734470635052	0.000401472312319949	-1406.4620592322	8.22850781833614e-06	2.4985309507291e-06	10.8247177075268	121.470101549805	0.868903126081318	0.0269695448713776	0.000274748046542729	2.29614191210562	8
282	1	-0.000391663592001801	0.000212840949064927	-569.621481003302	1.09311438000543e-05	3.40996443270888e-06	14.8272655403307	28.5208939436902	0.773552428633161	0.0255401432088718	0.000558152617561953	2.93899774489293	8
283	1	3.49351719610047e-05	0.000408245956575579	-1364.69310900626	8.22571338142771e-06	3.60553118480794e-06	14.2871276592198	94.8911037933528	1.14686133437981	0.0234762567153268	0.000209715293033745	2.021751511026	8
284	1	0.000259176521155451	0.000242667662407625	-881.396695142154	1.34432537252436e-05	2.36115759417309e-06	11.1650939359134	136.884144478859	1.50859014631058	0.0203428302517352	0.000569807851525687	1.80003613854355	8
285	1	0.000250812756808868	0.000323274780133821	-1149.58589840874	9.33628527856977e-06	2.26355618562617e-06	10.3707475631795	127.806100346013	1.05106170125163	0.0234432600443881	0.000343544600936861	1.96330485524303	8
286	1	0.000252917159723873	0.000387255594033952	-1362.82281143146	9.024271578928e-06	2.26746455804418e-06	10.2418330748697	123.148608345657	0.948468445714331	0.026501014002406	0.000302932747986018	1.66919838396025	8
287	1	0.000260497610619325	0.000351098880285331	-1243.89897118833	1.32391649780043e-05	3.0181335575216e-06	13.6086434141088	126.573545971828	1.41322168136658	0.0250487688992393	0.000472838317805359	2.30464911033309	8
288	1	0.000256289640344805	0.00031899051823227	-1134.64884415752	1.2829902228119e-05	3.52274636292046e-06	15.6083401233089	128.779777044782	1.43411770616876	0.0234450599381262	0.000486557507601264	1.88811315063959	8
289	1	0.000112884358996586	0.000247921491861511	-851.406403028056	8.12973359737345e-06	2.61147289721089e-06	10.1756632413425	114.480865897685	1.57274752931977	0.0156080203868498	0.000236222805928996	1.59173453851691	8
290	1	-8.88175485413798e-05	0.000271675174429797	-866.818908535634	3.4155306599367e-06	1.14361038602655e-06	4.55256918014888	71.8961103379409	0.654661273539727	0.0163765684223165	8.70445790316206e-05	1.40737165228381	8
291	1	-0.00035763604304719	0.000162914219292877	-412.79071555335	7.50942084285143e-06	2.66489003069404e-06	10.8453728519596	24.4907246063146	0.575318738282039	0.022516918145385	0.000396630104817744	2.35598612143283	8
292	1	0.00120551644490873	0.000115289717601818	-769.357733847124	2.26590312637986e-05	2.80227397880747e-06	9.1206231771649	174.537125082538	0.166837447232976	0.0693861159362825	0.00129245874556704	2.12973827031352	8
293	1	0.000516751406938284	0.000405970176143241	-1511.28424146043	1.75062216364018e-05	5.73490875949064e-06	24.4575027764583	141.846118110704	1.02163055943211	0.0376518148700029	0.000814441378771377	2.48778854708758	8
294	1	0.000291850292025182	0.000240331086116678	-886.00999189984	1.36302833448924e-05	1.58331118173493e-06	8.18504075636236	140.529436853799	1.32609759634375	0.0216617157541634	0.000605613034505483	1.58285165060031	8
295	1	-5.37290233065855e-05	0.000410280423277135	-1341.01307347177	9.67887189703656e-06	4.43917074051746e-06	17.4093663923028	82.5391833062319	1.33126239509574	0.0237080501875653	0.000262271245387026	2.71852650552066	8
296	1	0.000156527275212727	0.000268257559138297	-933.151659802103	5.68883371863291e-06	1.79726239485722e-06	7.59244560077825	120.263400494495	0.921709469975423	0.0177951965204102	0.000186801915763547	1.355328521286	8
297	1	-0.000191668388209938	0.000198539864725553	-586.605661253239	6.20497992789851e-06	1.679122901302e-06	7.17288449378194	46.0088610666883	0.957964052353422	0.0158114391649349	0.000256442296533417	2.31288170052113	8
298	1	-0.000225098980554983	0.000189494128333298	-544.560770696901	7.60870501907823e-06	2.29634658111092e-06	10.0522842350582	40.0915376173636	1.0136324880887	0.0168587484515115	0.000344102034076389	2.00295982015232	8
299	1	-0.000474024063880227	5.10785972835283e-05	0.45178949819272	4.31880758664154e-06	1.78248129722792e-06	7.1088115040959	6.15019250371793	0.220116479602384	0.0273167987708689	0.000246268372913395	1.43215735818505	8
300	1	-0.00038618586852034	0.000208966143700534	-556.578463660526	7.31616882724637e-06	2.94573379610136e-06	12.0679707248929	28.4179315414425	0.566294010036752	0.0251584162577387	0.000377321740130324	2.22395484151587	8
301	1	0.000293846739973313	0.000258595162896782	-948.637716198544	7.41462818222319e-06	1.5726984482609e-06	6.74698851834952	138.651120433401	0.737540792348285	0.0224272799552239	0.000324426249800014	2.18284466616505	8
302	1	-0.00020603892367279	0.000262977814647741	-795.131178450421	3.02904932074381e-06	1.04740019105698e-06	4.2926470421088	51.9218668474194	0.42366973475539	0.0191413666596816	0.000116996398537379	1.87289467975966	8
303	1	9.99877679065828e-05	0.000335895656291703	-1137.89855510447	1.2141657470126e-05	3.78557383443569e-06	16.4592852969199	106.576957142729	1.91067210514477	0.0200799789577957	0.000287415484477812	1.92821918277208	8
304	1	8.25545634687e-05	0.000344489673656166	-1165.01338568129	5.74369565925829e-06	1.34121303919369e-06	6.09452859994522	103.476395008475	0.904827158316836	0.0202966512821661	0.000107080896243528	1.23470633528872	8
305	1	8.06439664048496e-05	0.000305922794739644	-1032.1904502789	1.64271798989453e-05	5.38043623538506e-06	23.2446921637456	104.767726354753	2.88742015474023	0.018126866951377	0.00038264687984808	2.23291755842648	8
306	1	5.36356350772776e-05	0.00026895990093328	-901.766936521077	1.10905337665694e-05	2.47215906126099e-06	11.5522387850594	101.277904124162	2.27446796843617	0.0157136958905824	0.000186384659362476	1.83436823503894	8
307	1	-0.000655550492103341	9.47332890264386e-05	-87.0479195800115	1.18430409987365e-05	4.2596808547083e-06	17.913654953272	8.22286174437164	0.393018302359573	0.0379504301821498	0.000672486455147612	2.74111231251187	8
308	1	-4.9538654710945e-05	0.000302892094207097	-981.642886214618	6.95337822076981e-06	2.13889529241908e-06	9.16028272907432	80.7113904446651	1.28267031508	0.0175850159200763	0.000136975339996774	2.21934863383812	8
309	1	7.19382875981107e-05	0.000276937141436098	-935.151714014915	6.79754503791216e-06	2.43046378659295e-06	10.0933536161481	104.561547533768	1.32312246337609	0.0163939328710399	0.000166597370730486	1.8189450425718	8
310	1	-4.33185106878563e-05	0.000181498134581399	-579.293134035646	4.41695959158334e-06	1.22887604507481e-06	5.17298986947563	76.5762367559715	1.32211412512048	0.0106911629642923	9.02331221776035e-05	1.37183005834112	8
311	1	0.000557556815626346	0.000492624338975667	-1812.19131031125	1.48433108206636e-05	4.72597000128857e-06	20.4811045076391	138.538081801667	0.804499081526083	0.0426285273228189	0.000662068013506808	2.45480857308476	8
312	1	-5.62529988027894e-05	0.000344476797938739	-1118.25929695905	8.53335696898427e-06	9.49590977199881e-07	5.54774603381738	80.7254721243975	1.3826897196176	0.0199984969506772	9.5353906189985e-05	1.61858112760378	8
313	1	-3.44309505072606e-05	0.000264150595010918	-856.071817266745	1.08305245112382e-05	3.58312353289879e-06	15.3701108631853	82.5735987530536	2.31210340707065	0.0152627422153273	0.000218806336771954	1.58500226870445	8
314	1	-0.000526599516254614	0.000212933208795672	-528.074465266305	7.88797331072973e-06	2.28915939588067e-06	9.78397143944431	22.0161978140905	0.367133751049605	0.0325451896361812	0.00042186545755902	2.6550883675961	8
315	1	-0.000326510834600124	0.000251631098524732	-720.182575620204	8.34958828471888e-06	2.43135871315519e-06	10.5390233140121	37.6202520984838	0.757299225992907	0.0236186182318079	0.000388349545306178	2.33774895970901	8
316	1	-5.29014958008467e-05	0.000167755458774394	-529.293438488173	3.47767997292959e-06	1.16031155423733e-06	4.8004823521429	72.4973896191754	1.08630743014305	0.0100782708389318	8.72416383792688e-05	1.29139232160407	8
317	1	6.46557643856509e-05	0.000320477345982585	-1075.32588371854	1.30037217694776e-05	4.25246883996463e-06	18.3297983349948	101.406218320087	2.23877041975472	0.0187319601999718	0.000280630553056952	1.97335978018897	8
318	1	-0.000126936193883981	0.000219328436105985	-676.856132640524	6.15724932317618e-06	2.15376729394292e-06	9.00719259913113	59.9399145605276	1.22933714975546	0.0145194511590034	0.000206481142093881	1.86170028690171	8
319	1	0.000133467078708949	0.000352373152730319	-1207.78851101629	8.76618108933611e-06	1.93452343680338e-06	8.86004402012465	110.74499951842	1.25089153259372	0.0215892053342941	0.000205900529555967	1.50328586357453	8
320	1	0.000142306503529972	0.000257160434644949	-892.586809475376	7.88518501616639e-06	2.14765958938827e-06	9.47621060564729	118.959104643653	1.36015986736717	0.016839757418353	0.000243809560065651	1.89170560731756	8
321	1	-0.000127531959122596	0.000164915959546763	-495.022588495112	4.58530156370035e-06	2.3739350582914e-06	8.97581044388871	52.2846866596281	1.07381781444625	0.0119447166724171	0.000193407482967062	1.70914829001657	8
322	1	0.000346644961997349	0.000291889340500268	-1074.21591439898	7.22240653220419e-06	1.92216331144448e-06	8.50784154891074	139.901240049466	0.616848288868816	0.0259646677108094	0.000324391526895032	1.84020438356437	8
323	1	-6.4232063087274e-05	0.000240368285265861	-767.768639375319	1.22299242894365e-05	3.52351688583904e-06	15.6185884770701	75.0387989590536	2.72896189630922	0.0142553313367273	0.000266018360997586	2.61585183791938	8
324	1	0.000190287845256038	0.000294556764816756	-1030.4143247942	1.05310382230939e-05	2.71805662407008e-06	12.4040268842792	122.86303306084	1.46523408767999	0.020092212655328	0.000352580050122067	1.20694661969791	8
325	1	-0.000139444514398303	0.000340038415074929	-1076.9481672508	8.757908960154e-06	1.07921955595119e-06	5.89830415705653	67.7022217365513	1.26486180051462	0.0210573397280598	0.000198799776237976	1.89260677504123	8
326	1	0.000287280450856279	0.00038852916465289	-1376.38031577875	6.23095541090369e-06	2.28750033277924e-06	9.58455558251466	126.479410740304	0.615574152815364	0.0276854802987998	0.000236975262629048	1.00126997608874	8
327	1	-0.000131039403055498	0.000199925816315829	-610.327265493106	5.02328530108984e-06	1.56049099154352e-06	6.75186934605891	56.7575580435938	1.0276553670254	0.0136961669063567	0.000174598128695696	1.462404103417	8
328	1	9.65543485103284e-05	0.000376702015439385	-1277.74402984446	5.34763973110399e-06	2.38161305254544e-06	8.78230142430075	104.376269297689	0.768182199972328	0.0222811445189564	0.000152511774989605	2.45261479311098	8
329	1	0.000220595393207694	0.000350455692623399	-1229.8005254806	5.13327613388268e-06	1.39643885989554e-06	6.23704075024488	122.188486945881	0.609829606969684	0.0237263684163622	0.000170682847983944	1.53543226912674	8
330	1	0.000429829933249336	0.00039866553358253	-1458.18314850796	8.65807703050998e-06	2.38942602723856e-06	10.6752859199123	137.1542026387	0.60035735741782	0.0335895939536499	0.000375438707891978	1.81487592978053	8
331	1	0.00019369311374325	0.000320053069646981	-1120.5001525213	1.08968848267217e-05	2.6187523558286e-06	12.1509932530462	121.181932531611	1.44283407009424	0.021434363861573	0.00034781392795258	1.69380501743176	8
332	1	-0.000485792705414039	0.000211504162636046	-533.806267846587	4.75100456659825e-06	1.56995433797463e-06	6.64359852829257	23.5273194149936	0.257470034028605	0.0303574923091503	0.000252153142648948	2.10139123421199	8
333	1	-0.000366762930240228	0.000161197295606176	-407.148650558755	1.27422530107146e-05	3.61668510500122e-06	16.1099901879479	23.7261418652696	0.872860094279769	0.0229540649870899	0.000673551033358687	2.17620837086141	8
334	1	-0.000132717772932376	0.000312055832473777	-987.946657315817	9.33858785693982e-06	2.775978759015e-06	12.0983394167659	66.9598841008946	1.46355338767789	0.0194293393977034	0.000255489938658817	1.32938611580663	8
335	1	-4.65177054469866e-05	0.000302997049389239	-984.499932378345	5.64170169454345e-06	1.91813772594659e-06	8.06575666296366	81.2717984985346	1.043680643946	0.0175638530588458	0.000119189797165741	1.84265666089494	8
336	1	0.000282481372366911	0.000382551797300049	-1357.59847055546	4.23742369249073e-06	1.56293517038918e-06	5.9937346987768	126.442656801219	0.425669471306872	0.0272466324597644	0.000161210372124873	1.9217972578508	8
337	1	-0.000164520049971522	0.000210641305986511	-637.576867123375	6.08725231086279e-06	2.78130089034704e-06	10.9815142012573	52.0086109174576	1.09193383597918	0.0153138021275367	0.000248721796238685	1.40779696051727	8
338	1	-2.01658960223995e-05	0.000251610350182476	-821.94341850518	4.83633572090874e-06	1.15979792099976e-06	5.22869968308262	85.4176915273613	1.09448537594885	0.0144624386594501	6.98406032785474e-05	1.63204081582068	8
339	1	0.000221942057908034	0.000286670234873217	-1015.13905894761	8.71931998688065e-06	2.55625188168279e-06	11.1306977574028	127.747281696395	1.11731302116921	0.0207722361294032	0.000327025736902165	1.95451026607697	8
340	1	-0.000197824979274166	0.000218596232967275	-652.175391576328	6.10806354925753e-06	1.87187409958745e-06	8.01180924297308	47.8555692950711	0.913366539496512	0.0168919609756131	0.000247927087073636	2.48702106628653	8
341	1	0.000154217904867153	0.000319308669786609	-1103.59497949395	7.25451792209058e-06	2.84381963020939e-06	11.3312278127412	115.779352071386	1.07426602216455	0.0203170848973002	0.000232820506846507	2.08029666578871	8
342	1	-0.00044525273146638	0.000181324792299493	-445.177208500244	8.01354913164396e-06	2.47018995972415e-06	10.7102980023899	22.1581267345108	0.451759272612747	0.0275454272961042	0.000428570550181089	1.88860874486089	8
343	1	-9.18921527376142e-05	0.000269053477027137	-854.979442443763	1.20489091040074e-05	3.54631402787715e-06	15.6256633882903	71.1429824209678	2.30939641206503	0.0162899404811299	0.000294547890432788	1.54888282827382	8
344	1	-6.38384322468611e-05	0.000325611305752839	-1055.12916092177	4.63373131699972e-06	1.79962651752356e-06	6.89095389812108	78.9074498887893	0.787460203557677	0.0190113284693894	0.000113346534122113	1.80556865701209	8
345	1	-0.000150188318077565	0.000263254255799344	-818.25205360257	4.91604913646659e-06	3.16824647642897e-06	11.9981095194109	60.2949519528488	0.860050965212795	0.017365378985744	0.000210575956023839	1.59200988034715	8
346	1	0.000506149637504934	0.000372555583008276	-1395.65784445004	9.05425799843372e-06	2.41723918123728e-06	10.67135730084	143.644769411124	0.520503655154252	0.0360091559452087	0.000425785843780809	1.70855030046911	8
347	1	0.000152982764514833	0.000396347373122398	-1361.40662255078	3.33859699468431e-06	9.14332549412328e-07	3.64916050461865	111.105667135635	0.422386951129376	0.0243419381258718	8.44577472241622e-05	1.30054262871194	8
348	1	-0.000791821412303303	2.22371799966036e-05	200.484483710401	1.16342391625793e-05	4.72844467053576e-06	19.3725903117758	1.60864779107831	0.342693333379281	0.0453859026239627	0.000666373074654768	2.63049465575888	8
349	1	-0.000146638747377823	0.000229735064198123	-706.370375668286	1.25270267647435e-05	3.61218538364245e-06	15.9965568219361	57.4501126292119	2.257114607769	0.0156157140850155	0.000423748184530566	2.90814581264539	8
350	1	0.000206415567429027	0.000303386965187847	-1065.24411976186	5.64287751491149e-06	2.03602500774548e-06	8.26308408477412	124.230218941383	0.750096992070151	0.0210245865536365	0.000205861763724702	1.65526949886642	8
351	1	0.000337979917558663	0.000300813695248097	-1100.42559693644	6.84542765542505e-06	1.74761874324113e-06	7.99076889278598	138.329823062045	0.5995580712714	0.0259239992993798	0.00030044584027121	1.45741697249615	8
352	1	0.000559783014277705	0.000423114096386837	-1582.62081902294	2.52478355502337e-05	6.75436717541865e-06	30.560865625488	142.916051501797	1.31865108676358	0.0402044284777787	0.00117738085856923	2.1636522678798	8
353	1	0.000230455796823243	0.000286484992221242	-1017.21100758704	7.27182651116291e-06	2.56744550158887e-06	10.5242952570533	128.814081685945	0.917888358807099	0.0210661172081075	0.000285197895428403	2.00704589769051	8
354	1	-1.50173870690636e-05	0.000349223455406545	-1148.8221506113	3.51860452124652e-06	9.93405941245011e-07	4.19825193214445	87.5376707827835	0.576261143173133	0.0200275210086716	5.75212361767908e-05	1.91460260569491	8
355	1	0.00031811526042699	0.000303695499410771	-1103.43624316745	3.34602124063415e-06	1.08265746758391e-06	4.47158650401227	136.328448215374	0.317820842717104	0.0251989580817451	0.000145132874224874	1.37622946835118	8
356	1	0.000238256490608609	0.00036102043239442	-1270.74907350731	3.09750389796619e-06	7.93148352435414e-07	3.46689216196874	123.422932375755	0.347297950696441	0.0247834472004342	0.000104855540636368	1.61930567601131	8
357	1	-0.000503500826385595	0.000240761029035229	-628.585411053772	5.19782848989377e-06	1.83603267611866e-06	7.38919700870794	25.5559166156453	0.286195675486706	0.0319769429514167	0.000272482477187039	2.38615433354402	8
358	1	0.000158855897080329	0.000248377673673007	-866.010952742927	5.17403350811855e-06	2.17751104157249e-06	8.69167548180371	122.601923321714	0.877203019696401	0.0168927022751859	0.000191205627742956	1.2285519868658	8
359	1	-0.00017038138032079	0.000208170869345792	-626.425973366387	3.35255563090043e-06	1.06166874979262e-06	4.46966211763228	50.7007420136673	0.570832904431918	0.0154129823724531	0.000130451455089747	1.20778631372973	8
360	1	-0.000291209724901082	0.000176270318263361	-479.330377747041	4.94216451785532e-06	2.55228702842568e-06	9.96467658794375	31.1866738868742	0.566229396557988	0.0195036651423095	0.000253803311143034	1.61101242562807	8
361	1	7.31384576247856e-05	0.000272958235897147	-921.801940474841	8.49095219051727e-06	3.87250528315113e-06	15.4020454751009	104.999905748977	1.67528856072767	0.0161910440232873	0.00024856874449436	2.12054701850713	8
362	1	0.000340046238852376	0.00020468198597988	-782.702622873466	1.09803452602649e-05	1.66522895121806e-06	8.06119844904878	148.955256368608	0.843004901193336	0.0227404446808066	0.000541255314625695	2.18502124713912	8
363	1	-0.000481596642999743	0.000180257932501582	-431.833576266955	4.76097566979973e-06	1.8015490041429e-06	7.29555735732441	20.5204896313693	0.264425083010205	0.029462969666298	0.000258024400815481	2.30592082965655	8
364	1	0.000508419266076287	0.000264665527673831	-1038.25187801873	1.85866539567257e-05	2.80287119597216e-06	15.1663052115508	152.500070056263	0.893169248787963	0.0328409252240363	0.000947516888998409	1.96188207984287	8
365	1	-4.88613351628938e-05	0.00028102119010739	-911.537011121068	4.76581060392002e-06	1.96903839961138e-06	6.46403437475612	80.1365510931764	0.945591205375682	0.0163428952061224	0.00012059133193556	1.43781682837771	8
366	1	5.42296847903269e-05	0.000315689220808301	-1059.15586646786	8.04036597822011e-06	1.90390620016187e-06	8.79507685048408	99.7472420295847	1.41862477477452	0.0183525935845807	0.0001328219578337	1.62624483179653	8
367	1	-0.000236329604285816	0.000240973738638095	-711.067434343615	5.7183945001495e-06	2.01200133904752e-06	8.48881780543477	45.5574670809428	0.733153927678577	0.0193384940496912	0.000243728282853321	1.50001973780415	8
368	1	0.000448455790391469	0.000439523539054347	-1597.79060173104	1.36454210252967e-05	4.64069110295991e-06	19.8410446827507	135.576323148239	0.922488051233899	0.0359776178669335	0.000588566990548686	2.02577075913544	8
369	1	-0.000332275639738222	0.000187871735460749	-503.869976690219	9.23225929339476e-06	2.80900733519659e-06	12.2232337234132	29.4842214438124	0.774546552699263	0.0218703983736646	0.000467227241832212	3.00852826815572	8
370	1	0.000144051109755629	0.000263089202549839	-912.237862221821	4.53160045099687e-06	1.36809098139357e-06	5.91692840247883	118.702342172015	0.76957253609025	0.0171855484362595	0.000142394056080464	1.46752824409889	8
371	1	0.000389083383817454	0.000225661507992543	-868.238829015759	1.32423730970395e-05	1.67093997305188e-06	8.87251449974783	149.887022167802	0.866110007943569	0.0257709364713037	0.00065808703171375	2.17066832463495	8
372	1	-0.000233821576123221	0.000303712830670097	-924.113155643174	8.7556219735318e-06	2.69874838686049e-06	11.612117319513	52.4081470618581	1.06587301091881	0.0219611066963239	0.000329644565329366	2.26703941067958	8
373	1	-4.69271432455997e-05	0.000273003776475361	-883.753426615805	7.72753944885701e-06	2.55601579087323e-06	10.6639718335813	80.2466334452936	1.57779263934662	0.0158713668135988	0.000162658154925224	2.51652157098074	8
374	1	0.000303816274540792	0.000349953194450631	-1252.69274312944	6.01244499063681e-06	2.13654005316413e-06	8.82159999999629	130.963293383908	0.587419888544293	0.0265528409686056	0.000244023764288092	1.55827533810874	8
375	1	3.80952062999727e-05	0.000410166381986712	-1371.27512936557	7.17736788404571e-06	2.05224611007208e-06	8.0967183399267	95.306262986215	0.994375956940664	0.0236019451496077	0.000123102858162891	2.20130678796543	8
376	1	0.000178361565499228	0.000363364346672519	-1258.79168696821	3.05300511969411e-06	1.02277035116255e-06	3.92019922782648	116.144643602904	0.393141744637602	0.0231921594607343	9.33184618243856e-05	1.39286254604425	8
377	1	-0.000300235481725199	0.000159174398697105	-419.371820813118	4.52249597654776e-06	1.35185813978243e-06	5.84273454282893	27.9309779286759	0.410030145851976	0.0194702680190346	0.000231792674703831	1.66430627924957	8
378	1	-0.000334278315135601	0.000228979482948545	-640.177077354809	1.20103555463596e-05	3.6045237061718e-06	15.7771604467001	34.411007716253	1.0478577306031	0.0232152980425155	0.000579593684331818	2.18187547997428	8
379	1	0.000115607827065768	0.000286103806445635	-977.694712072328	6.60449274658692e-06	2.26052252182671e-06	9.45560933052228	112.002476633215	1.14780826546661	0.0176802328025758	0.000185793340515651	1.47264028453715	8
380	1	0.000245751624494703	0.00022556447194777	-821.099609745046	9.80129548020216e-06	1.73448545470181e-06	8.49074964825265	137.452562367853	1.15934270208004	0.0191125172082423	0.000419142693388182	1.78405366133991	8
381	1	-0.000156476026016308	0.000223397491863021	-677.660631157143	1.15755571912753e-05	3.92379210023424e-06	16.7430520635222	54.9911520379109	2.04705677528844	0.0156272789220395	0.000422711978766216	2.2542461386423	8
382	1	0.000142189466599038	0.00034313532220945	-1179.50797888039	5.28998217267026e-06	2.14594055687327e-06	8.55776165366635	112.508289040607	0.764435681533096	0.0212813278950534	0.000162372680884554	1.38206304485176	8
383	1	-7.74222018294255e-05	0.000229841327810811	-729.155206539041	5.68238219783194e-06	2.17517144943115e-06	8.63540132194014	71.3838680451288	1.28270793945595	0.0138959961903424	0.000157325561350918	2.00624491912796	8
384	1	-4.13235818156202e-05	0.000209387336310201	-672.865557600396	4.70416402734684e-06	1.2143090948768e-06	5.27531796933763	78.8358746962635	1.24057586198449	0.0122284138590771	8.59219304760913e-05	1.50719657399491	8
385	1	0.000111097416457049	0.000358691155183559	-1220.89026015408	3.13841269649496e-06	1.40093908187503e-06	5.46952821813132	107.209322288373	0.461785014869161	0.0215146962422637	9.33239030679164e-05	1.61851195897554	8
386	1	4.35551612599494e-05	0.000228426330126479	-764.368973745219	6.48492384023017e-06	1.75881321415377e-06	7.80802121275282	100.795282528465	1.57163594935826	0.0133236574745581	0.000121004365025551	1.23950073129013	8
387	1	8.97560764581116e-05	0.000222668337667861	-758.892831348713	2.26508440785866e-05	3.26209287386067e-06	17.7055046453628	111.954024887613	5.02217810188858	0.0137554434766685	0.00051523529872698	2.04074034801008	8
388	1	0.000333761545728551	0.000345654701619398	-1249.23385486987	1.11612718110337e-05	2.4937376853681e-06	11.7946349179119	133.997141956454	0.97945067846002	0.0275302438571714	0.000455943235774665	1.40469675047073	8
389	1	-0.000231362759553879	0.000207999119187741	-606.38808504151	5.2565410977184e-06	1.25858596521949e-06	5.63281380176241	41.9560892192202	0.6697668404381	0.0178255590009258	0.000229103003178097	2.10024902087967	8
390	1	0.000253194224218946	0.000398950359740625	-1401.49643466073	1.09345749159093e-05	2.62625993897933e-06	11.3243554174866	122.401292783283	1.13240877175291	0.0270730089163465	0.000358945980281493	2.29862071777805	8
391	1	-8.25799008473965e-06	0.000201571276748644	-658.384294566102	1.53268442136862e-05	2.10497442140539e-06	11.2593350282724	87.654013285326	4.34935945007497	0.0115588712146462	0.000125752225999732	1.43588566259039	8
392	1	-8.68089047575173e-05	0.000233146087731983	-737.488116743995	6.2883359648297e-06	1.57328004583805e-06	6.990239643733	69.5778415289766	1.36308213378401	0.0142542044563641	0.000151465045603711	1.95111178641154	8
393	1	-0.000310072083177276	0.000251371365170385	-726.062881326164	4.98410295796723e-06	1.4703574207338e-06	6.30845969443368	39.0312279242564	0.479431086250345	0.0228704372349853	0.000228085916171317	1.76608431929884	8
394	1	-0.000139950174541673	0.00027346214621882	-855.221010544068	8.2032518042121e-06	2.44077525374778e-06	10.4431639809086	62.8979204906973	1.3777182367676	0.0176008672154353	0.000247685452342883	2.09840794423897	8
395	1	8.48663426433237e-05	0.000271255489939633	-920.787531226545	9.79176250691754e-06	2.61874179952832e-06	11.5871574388893	107.373073835847	1.89044186911823	0.0162846895337054	0.00022038154814663	1.792510931193	8
396	1	3.02456421439042e-05	0.000293661212997889	-979.171093573976	5.94331574760035e-06	1.41031349922553e-06	6.16390457876812	95.8804451783204	1.14776187373357	0.0169145546839218	8.7624683236536e-05	1.28427788937739	8
397	1	4.40794384233555e-05	0.000331326878780922	-1106.75160487135	8.43861046255525e-06	4.30857478621281e-06	16.7949381364567	97.5780803432668	1.43719933840092	0.0191508937325295	0.000252877736075218	1.89378830871488	8
398	1	0.000326130037564298	0.000346526971678782	-1250.4838262403	7.94689034109978e-06	2.02986065157873e-06	9.29601969969977	133.263156058582	0.716638173890344	0.0272647076208159	0.000323344631298028	1.81484795317497	8
399	1	-4.68061880872608e-05	0.000282283051384606	-913.204552869594	4.60982248595149e-06	1.62833022506536e-06	6.5348783661471	80.5852762087279	0.912192306526783	0.0163944577971336	0.000101675966795466	2.410160133062	8
400	1	-0.000254392198346469	0.00023635844092329	-693.918024945019	5.58883320212192e-06	1.47437258982764e-06	6.58397270819858	42.8954821623476	0.652489293609385	0.0198958052466764	0.000241533445923396	2.07382990026862	8
401	1	0.000322010136683422	0.000367786975825167	-1321.0796819894	3.52256654838563e-06	7.74366046440758e-07	3.51319370445052	131.203261127131	0.316341111246717	0.0280080705876458	0.000137077391326987	1.60580272000283	8
402	1	-0.000327927774531052	0.000151067833387656	-383.010912527311	6.11865206390547e-06	1.88596283764391e-06	8.01700804663596	24.7342999633728	0.488819497310756	0.0206867206894401	0.000321604528698923	1.9410634283501	8
403	1	2.81503123079862e-05	0.000241678917571848	-801.905834303367	7.23382088793414e-06	2.00737574801521e-06	8.94215876395393	96.6437684361807	1.6928786648349	0.0139407987232403	0.000123897542337944	1.78976959464413	8
404	1	0.000185244812492522	0.000319137597518354	-1114.0849859189	7.56855918143564e-06	1.92167363000311e-06	8.02098033846278	120.133209534287	1.02734458045996	0.0211424092552477	0.000237611309772301	1.79949199452597	8
405	1	0.00039697846614145	0.000402942961070115	-1460.79716764056	1.03007926071512e-05	3.28829175946449e-06	13.9910475703061	134.572790474589	0.7791648821607	0.03240910150069	0.000435406671411165	2.49512828350475	8
406	1	-5.12602910768445e-05	0.000229158125512629	-733.191763189554	9.89536150976595e-06	3.4089948667844e-06	14.5369952355213	77.3910987355551	2.36319818606593	0.0134542717521811	0.000227266590988543	1.41719864662967	8
407	1	0.000149663393458208	0.000369152127388001	-1265.58096091556	1.31095318628225e-05	4.16023065205084e-06	18.036380965022	112.068849403163	1.76188995983474	0.0228230319579836	0.000358385068603878	2.79087324291402	8
408	1	-0.000478816796210621	0.000149564672646815	-327.492794869339	5.58864165308358e-06	2.04953689223961e-06	8.56877722226205	17.3468755609154	0.293515063574625	0.0287414198817544	0.000307640515653751	1.94189170629337	8
409	1	0.000196982749160032	0.000307356370239052	-1076.48804432864	6.34789555088125e-06	2.10954713228186e-06	8.80886482047242	122.65555279983	0.85762037318101	0.0209165013722554	0.000221066617031909	1.31321301065414	8
410	1	0.000231500358816493	0.000301719624213736	-1068.97018753989	3.45753995134157e-06	1.07074327209888e-06	4.37192776778773	127.49793797036	0.424785693845497	0.0217895129345038	0.00013004361970895	1.84482089280382	8
411	1	-6.42020576920308e-05	0.00029175288259819	-941.489292446972	7.48859529704732e-06	1.34015729315607e-06	6.17756046476414	77.589505081197	1.40380592911691	0.0171161629574783	0.000118855981413473	1.894287061054	8
412	1	0.000294157381069851	0.000259437298370994	-947.4689660877	7.15260205182926e-06	1.88319570423015e-06	8.48246835405695	138.588748414193	0.721269371346343	0.0224725311122995	0.000315530458011195	1.58955266508961	8
413	1	0.000188642839998984	0.000348015846020223	-1209.90528144177	5.14456697710574e-06	1.41871201193829e-06	5.55015128891248	118.460015227928	0.661906972643802	0.0226808173883057	0.000157600833297434	1.95516875478423	8
414	1	-0.00033011930407215	0.000215770670223033	-598.658633834735	9.26482900363428e-06	4.30518952852876e-06	17.2195493188476	33.1692014559208	0.90355273771323	0.0225963194460519	0.000464382930438955	2.79113676301083	8
415	1	0.000169423737610966	0.000322085491755162	-1115.1961511043	1.46390027954378e-05	4.84514638429854e-06	20.8147930095216	117.74531333557	2.07042197592521	0.0208515279012715	0.000461338910974553	1.97401379067753	8
416	1	0.000110899074276237	0.000339474215784765	-1157.38333826227	7.44078067799601e-06	2.05736918899303e-06	8.97265719423498	108.091124360985	1.1393611688581	0.0204620016248214	0.000173440528561857	1.37579376656461	8
417	1	-0.000252739525497236	0.000233070766192418	-680.045220516608	8.17028713836073e-06	3.11726366975587e-06	12.8172399115202	42.6815605217592	0.998950891759262	0.0196983557141834	0.000364812051914639	2.19138151611616	8
418	1	-0.000262714495590409	0.000215903652006014	-622.006596909328	1.16622646770562e-05	5.5542092757786e-06	21.9595041968056	39.4140007245097	1.44197965825436	0.0194833692978023	0.000554368456446236	2.2577448008152	8
419	1	0.000219582205976217	0.000341015365756689	-1196.75351613307	5.93757750878634e-06	1.21230294013252e-06	5.2904552662808	122.777771597737	0.711279790362504	0.0232389171995919	0.000193214393474139	1.74225457052122	8
420	1	-0.000327795242108003	0.000112015885678909	-251.677797820993	7.67336948511681e-06	2.9819485868668e-06	12.2227955234869	18.8665892331341	0.621498818590313	0.0198476144453537	0.000419683322294142	1.9958709217973	8
421	1	-1.34318527846056e-05	0.000287088883899994	-940.681817453664	1.0984886108449e-05	4.32480917788956e-06	17.6753913331158	87.3212906502194	2.18789190868021	0.0164669742439116	0.000249264160955559	2.45153713780077	8
422	1	-8.09474662100687e-05	0.000245726824868541	-778.192432001689	4.69140172460985e-06	4.57335365653681e-06	16.3926391078503	71.7670547473943	1.03643583736774	0.0148233562682094	0.000262703659904966	2.70454736351898	8
423	1	9.35584434337927e-05	0.000284288821651455	-964.768631066869	7.17971796424788e-06	2.09135717477028e-06	9.22093212753675	108.216192114585	1.31158816827084	0.0171479396677228	0.000171731745442536	1.21125199992798	8
424	1	-0.000118386257452802	0.00034529211322586	-1103.24205448574	5.02889509416833e-06	2.17467382355462e-06	8.62093130566009	71.0752976676125	0.754853317562682	0.0209142888701024	0.000150415420139898	2.05087283367433	8
425	1	-3.32008404927557e-05	0.000237581213591947	-769.171256446526	8.68854660070723e-06	2.97901035574625e-06	12.5077415651723	82.044706945556	2.05757723541673	0.0137446743456735	0.000182543625106711	1.9518799302842	8
426	1	-0.000232045379727628	0.00024217537254398	-720.343427523132	4.96478454299286e-06	2.84475175262594e-06	10.9588958971028	46.2237287701318	0.698606652728836	0.0192170728634835	0.000229307260185324	1.44142943312253	8
427	1	6.75296246764897e-05	0.000285806825432814	-963.997132798414	4.5826089760292e-06	1.37385690139693e-06	5.95702293162602	103.293877606688	0.872282104264998	0.0168264142191106	9.75387850365183e-05	1.21841954784704	8
428	1	-0.000169418104206636	0.000224885325924437	-683.344099617191	4.73839404784944e-06	1.66965069923138e-06	6.77174776058267	53.0073366910027	0.796820284031135	0.0161321860559838	0.000180345039492154	1.62040564198819	8
429	1	-0.000229592982065938	0.000166105912259342	-465.328186559709	3.80313335069845e-06	1.31814742909011e-06	5.43012486964881	35.8849830825518	0.499777409583783	0.0162364661537993	0.000182010126702936	1.40324370383244	8
430	1	-0.000176299585988075	0.000270574087451168	-834.528520477036	4.42879063087176e-06	1.98736949295008e-06	7.92279874324994	56.9126990116064	0.685893155718778	0.0185032436517929	0.000168200505253999	1.6074435222632	8
431	1	-1.34581061643047e-05	0.000218075259618236	-710.766413521771	7.16963536519574e-06	1.82045912522507e-06	7.98292537950854	86.4685768991104	1.87679026333841	0.0125185624594621	0.000107137376883384	2.41210399180141	8
432	1	0.00017413380626232	0.000331756050820799	-1152.5268329148	9.0693694992287e-06	1.77800011747598e-06	7.46218048367689	117.694311509803	1.23448586392711	0.0214675478054005	0.000257798572448016	2.00542713649448	8
433	1	0.000249678566220354	0.000361088468555909	-1275.21372034906	6.09036602494503e-06	1.5286458206034e-06	6.91165736873511	124.662343558937	0.6635707828927	0.0251530588774358	0.000211133254771099	1.58716396143152	8
434	1	-1.83458791070383e-05	0.000218868193842087	-710.827115918249	9.20804304263826e-06	2.61927101333506e-06	11.6684450580377	85.2085775533255	2.39436318146547	0.012584200644767	0.000155906467550515	1.73829011942063	8
435	1	-0.000106595289719454	0.000309055923582178	-982.078429178724	2.49355464805501e-06	1.03632267941512e-06	4.03281131146534	70.9703708840257	0.41735570339567	0.0187312611805339	7.29441557129764e-05	1.59980135589806	8
436	1	0.000190893519019298	0.000351967666039195	-1224.50366230378	4.37228901272649e-06	1.16332954835908e-06	5.0350184984234	118.473675542281	0.555671005544683	0.0229413300264412	0.000133031258347469	2.32756072308548	8
437	1	-5.68053939550241e-05	0.000249558001983404	-800.492755343052	1.03906984297381e-05	4.36524250279283e-06	17.7271043817263	77.1765967492867	2.27842197446746	0.014664367176465	0.000277368045817559	2.4812447816083	8
438	1	-9.57647387020493e-05	0.000170486647167246	-524.456604978215	4.08928031566851e-06	1.2715164505889e-06	5.31592432542707	60.6764675618994	1.0604886273453	0.0112037177793525	0.000131152720807641	1.36394808852866	8
439	1	0.000297139155249762	0.000354144427107174	-1266.38562748638	6.89342451864561e-06	2.15169822183384e-06	9.06885709434283	129.997787544435	0.67657910088118	0.0264871344197957	0.000270864677783142	1.62713794441578	8
440	1	0.000199832778472391	0.000284241117232469	-1000.87634340502	1.13788889932642e-05	2.95390169592255e-06	13.3312772197151	125.108739063925	1.56035345730827	0.0199078011663403	0.000399708330800377	2.02951654423092	8
441	1	-0.000295734401568126	0.000230784662142826	-661.584454752351	5.43072164531234e-06	1.67481524192351e-06	7.15082231086246	37.9676988162359	0.548708456725223	0.0214932028064823	0.000252307326010217	2.12185377604666	8
442	1	-0.000690882516794327	4.20048346218845e-05	102.874062706153	4.45776805394252e-06	2.43887654643536e-06	9.4248195712969	3.47923242071633	0.202754756717715	0.0396577407731229	0.000255081416207392	1.7581691897627	8
443	1	0.000233223337091698	0.000349025101075892	-1228.10863400301	5.85642487320575e-06	1.271597707906e-06	5.29441933933859	123.75138688066	0.671584864639509	0.0240513750886748	0.000196022520560898	1.57115536043795	8
444	1	-3.11371607250069e-05	0.000337975066049585	-1105.34477817012	4.07121911749104e-06	2.0475179482271e-06	7.70323168093061	84.7362802520624	0.685105618819877	0.0194465504391133	0.000118763285691884	2.64684206910708	8
445	1	-0.000122829529938892	0.00021227679676783	-655.846098820495	5.10362923788213e-06	1.53260261311943e-06	6.49121893573754	59.9450771138918	1.04746246570455	0.0140519028894914	0.000164998853781969	1.55637584436732	8
446	1	0.000206557727983335	0.000336163795178274	-1177.68927727798	9.47824655951416e-06	2.3227433655257e-06	10.7079047984946	121.56887851126	1.18593020706478	0.0226062294089502	0.000306083387316153	1.93971993499469	8
447	1	-0.000108465778003899	0.000316873702825692	-1009.21838106026	7.25618662998939e-06	2.66462589936329e-06	11.1031615879572	71.1039392932808	1.18366868853978	0.0191897038109232	0.000197464731449496	1.59084683279792	8
448	1	0.00014716574198215	0.000200628386172093	-704.021505635408	1.01401196070426e-05	2.96578347728451e-06	12.6963667423613	126.260942153712	1.92562802725973	0.0142561182132681	0.000369941618143893	1.82396547712801	8
449	1	0.000114407264457771	0.000394458152331163	-1341.15433311545	8.0956324429847e-06	2.49826704342095e-06	10.863208450781	106.174088401679	1.08899846132564	0.0235321960388148	0.000188663188490144	1.49831154210506	8
450	1	-5.20247264159507e-05	0.000223432947879157	-714.505721940051	6.30114698087581e-06	1.72930297949773e-06	7.74487069326579	76.8926414100933	1.53585582058277	0.0131442128546553	0.000126552316765857	1.50392930154831	8
451	1	0.000239078096090924	0.00036592908572853	-1287.36424666502	4.93312655306935e-06	1.1213864398692e-06	4.96581682659977	123.158409655573	0.547273141908005	0.0250443783100707	0.000163685525401431	2.28454128129667	8
452	1	-9.34879657758752e-05	0.000275478861908926	-875.640606593721	1.00457146630967e-05	2.46966942803209e-06	10.5548373476173	71.254570612095	1.88009949103138	0.0166679122598907	0.000228404582331152	2.99045190158383	8
453	1	0.000227782427719593	0.000307693748141783	-1088.26348230245	1.04638912835567e-05	2.53671817254608e-06	11.4816603660527	126.512154809343	1.27879760710396	0.0219346520543127	0.000375360577050222	2.21344472689519	8
454	1	-2.22790442527747e-05	0.000314713817684106	-1032.59853224377	8.25388746322092e-06	2.57178894699868e-06	10.4281673469808	85.9507045134261	1.49554673322876	0.0180768989008868	0.000150730654858291	1.83739126711604	8
455	1	-0.000438909895287564	0.000197629242159861	-502.83337041084	8.32704604427516e-06	3.77418075052464e-06	14.9458496730678	24.2407480846438	0.577414765050492	0.0275794041347126	0.000444004632773549	2.14198747527844	8
456	1	-0.000353368119301595	0.000137669874084642	-329.778638387706	7.82965932473106e-06	1.39803200680387e-06	6.48129575856227	21.285558140192	0.472368486742513	0.0217287781974562	0.000419013857127326	1.58979309397527	8
457	1	-0.00028931192112873	0.000215871020221989	-610.657901656019	1.15919768931324e-05	3.86649972359189e-06	16.530251198373	36.7285780995407	1.205270875059	0.0206822426562496	0.000548556738700607	2.30324791208507	8
458	1	-1.85769175346221e-05	0.000242173586526164	-788.956956668443	8.24651590398075e-06	3.33994059842253e-06	13.3788786530866	85.6134827793485	1.94056338079063	0.0139162880661274	0.000194196059555461	2.15611145586264	8
459	1	2.22056553563475e-08	0.000241282230912353	-794.353924759704	7.91130736142785e-06	1.25228702109986e-06	5.97665364863504	90.0052730378231	1.87864857157299	0.0138244532933811	7.175076871762e-05	1.50156700506244	8
460	1	-0.00028171696360286	0.000161752323430478	-433.589845491412	6.15252770653456e-06	1.72840760977547e-06	7.51842112806637	29.8629807000909	0.601537000075018	0.0186125985192689	0.000309657845485389	1.98668018939499	8
461	1	-0.000192852318537761	0.000387593093382295	-1221.38874177725	5.88727916197888e-06	3.51214617697506e-06	13.4269187854327	63.5467216897272	0.727666377717969	0.0248045333910909	0.000234600515871088	2.29743765199174	8
462	1	-0.00011884790533829	0.000231184042991485	-719.74675899947	7.23851005549898e-06	1.80478573362377e-06	8.06039779107762	62.7930511436582	1.43056847719146	0.0148936941489239	0.000210744740563796	2.63924412431267	8
463	1	0.000109417101867405	0.000314347341655163	-1070.88843748741	6.21838582605905e-06	1.89614376006259e-06	8.25608300115974	109.191835329765	1.01661461289317	0.0190706611647045	0.000155708711483924	1.06875054596956	8
464	1	-0.000165177660078644	0.000280954746586075	-872.426896694487	3.59683362817668e-06	1.15085991761808e-06	4.67861143281041	59.5480681117435	0.554660706265742	0.0186734339494876	0.000118912486187902	1.33064111659385	8
465	1	0.000205287803475783	0.000343830687589939	-1203.1726312463	4.16872217715368e-06	1.0888245482968e-06	4.86689796814138	120.839766967352	0.518304161213711	0.0229442669297839	0.000133647345542741	1.35922283458051	8
466	1	5.21247403561909e-05	0.000291067745597742	-975.366034010315	5.1438339323378e-06	1.74213485255867e-06	6.9910930173796	100.152970351089	0.982887152338343	0.0169422579455727	0.000111143462373154	2.78925081617659	8
467	1	0.000628886428589804	0.000385240241209001	-1478.8974009993	1.96082328392621e-05	4.80165893383698e-06	22.1974315424654	148.509396780748	0.856957704461958	0.0422557048419208	0.000968729217325507	2.57045740155391	8
468	1	9.48772834930778e-05	0.000367602897702613	-1245.36992899548	7.78716386987849e-06	1.00469042270908e-06	4.84422182327459	104.472050521456	1.13856104515147	0.0217523014142387	0.000124656939547584	1.48725458140592	8
469	1	0.000106175593421386	0.000227445498901867	-778.666560560172	5.89578440356152e-06	2.09219453972672e-06	8.71269291769712	115.024000912214	1.23608176839694	0.0143816639913723	0.000179488767423517	1.54565823874862	8
470	1	-3.53024183501408e-05	0.000266823738994312	-863.0820827939	2.518716783033e-06	7.57693617357473e-07	3.19043854360575	82.463190352394	0.531967013260453	0.0154210997228006	4.70161496819937e-05	1.29755769966337	8
471	1	-0.000452724531853507	0.000208646364039695	-536.024201495006	5.61388788619134e-06	2.21777670394632e-06	9.01866103797561	24.7434758077314	0.355717300615222	0.0285614010514053	0.000296923600004216	2.50219666367113	8
472	1	-0.000169584651339902	0.000191578601962555	-570.359631123859	1.61521899598497e-05	5.30126978767955e-06	22.8087116527966	48.4848679057236	2.82041090659464	0.0146593591329065	0.000654212407946655	3.00964562428562	8
473	1	-0.000193418669369296	0.000283196407362279	-871.680436541712	3.99907900121428e-06	1.1422997158068e-06	4.71061236775621	55.6675415600316	0.562125848314467	0.0196492764137588	0.000140074675238183	1.39506216436724	8
474	1	0.000280074070089172	0.000305771649077643	-1099.39046374309	1.12862571959571e-05	2.45605324635501e-06	10.1388491870402	132.488383789465	1.17262435466084	0.023757912174915	0.000448934676959912	2.78427738835073	8
475	1	0.000224773305938566	0.000319796468451953	-1125.8523640042	7.97234810821478e-06	2.41069315285806e-06	10.4900816521177	125.101988750885	0.977401820656996	0.0223961869322409	0.000285941159440668	1.48502957504871	8
476	1	0.000320321060357393	0.000302567793276351	-1100.34676402709	3.56399250874345e-06	1.05212184659309e-06	4.40319434815013	136.632573728185	0.333407416982569	0.0252461111916205	0.000154110818359295	1.4862995640428	8
477	1	-0.000475211934241103	0.000229137295241134	-598.203169489052	1.01198748491228e-05	2.7517116299306e-06	11.9419342269125	25.7423963998915	0.548014682452973	0.030227541250639	0.000526751490937355	3.03273435978741	8
478	1	0.000224407293030652	0.000356056106984851	-1247.42001619199	8.72241419144228e-06	2.76430263531774e-06	11.9565616981309	122.221518294977	1.02439977149954	0.0241142793859126	0.000298259206637891	1.36208203182934	8
479	1	4.29349205275741e-05	0.00031465662171301	-1052.25465038528	6.67912310447624e-06	1.79521946677691e-06	7.30719709690795	97.7700282792859	1.19477320428098	0.0181955547001849	0.000114294846260401	2.75262781336019	8
480	1	-0.000230554827709253	0.000136156696235109	-365.598981641356	7.05811395859903e-06	2.15349376393189e-06	9.02745760315142	30.564443353471	0.864452129943436	0.0153413845499983	0.00035381936720023	2.22440317215404	8
481	1	-0.000449925618435063	0.000205340612752758	-525.759053049023	5.43598337766909e-06	2.50272819681545e-06	9.67367447652573	24.5313827776844	0.371404397338528	0.02833667546534	0.000289532086001521	2.56432338599544	8
482	1	8.09503070170146e-05	0.000256106509510429	-868.034142756415	1.05916638668373e-05	3.42304338872291e-06	14.3836242547691	107.540736434568	2.16553118398986	0.0153893832481344	0.000261577549086948	2.07999516816094	8
483	1	-0.000599193347918785	0.000119870998019991	-188.730223733944	4.30861024106515e-06	1.558277657958e-06	6.48599460464457	11.3129048415001	0.163728679653539	0.0350115016370012	0.00024270140214946	1.77701174445504	8
484	1	0.000133866153430149	0.000253724690182419	-879.608182406668	1.1804246341234e-05	1.9265983400238e-06	9.14328698302268	117.816306887489	2.09289392952957	0.0164366364278976	0.000330359026533069	2.45679562306489	8
485	1	-9.74383984490905e-05	0.000270139966427474	-854.557154802065	1.26828427758592e-05	4.03813455230811e-06	17.5074811036297	70.1658301299395	2.39595215959736	0.0164539511738155	0.000328876958162517	1.82410862834349	8
486	1	-0.000181586959199465	0.000231416567500784	-700.840970675955	4.84063096715841e-06	1.38860941595875e-06	5.86257605181437	51.8795843689864	0.76032271485928	0.0168538675328875	0.000182293914706494	1.68369138909956	8
487	1	0.000215886263736365	0.000374182417922694	-1307.76340058274	4.44577544542365e-06	1.76438551328826e-06	6.84675928486968	119.9829940512	0.523954202616175	0.024751467559696	0.0001545047359284	2.05082056545233	8
488	1	-0.000740751845776444	0.000130501298003008	-182.046757185708	9.59816725048073e-06	3.29113628391379e-06	13.8088051026444	9.99150510631611	0.277581980030936	0.0430955556808215	0.000542580875846779	2.67283281204263	8
489	1	0.000196718498811275	0.000242804208038867	-860.527302915692	3.18522879369661e-05	6.75989806070502e-06	32.5981525007355	129.014181742647	4.60431446164563	0.0179045455894311	0.00118762255194896	2.29630715786028	8
490	1	0.000164806610448402	0.000311824083861073	-1083.00288243273	5.43407660342458e-06	2.20384881473417e-06	8.95793254943397	117.857540749823	0.798193077689038	0.0202080734331958	0.000183382520488399	1.56949820305498	8
491	1	-0.000147487657221179	0.00021557437204794	-658.815843767462	7.09935768419282e-06	2.35418488412845e-06	9.59950668780838	55.621573783951	1.31793617910133	0.014965600124583	0.00025523827410493	2.17454607753417	8
492	1	-0.000110725913776585	0.00026151152669842	-825.251052290299	4.94220136864738e-06	1.65749996070743e-06	6.92632520842847	67.0518415597608	0.927411838346403	0.0162712450169522	0.000140845255706003	1.53907403194429	8
493	1	-0.000115188817636832	0.000280843989194989	-888.800641021683	5.10668686466119e-06	2.66452186885678e-06	10.4229508408074	67.698899198997	0.911998755406004	0.0173920585541225	0.000179662229564201	1.48848623965629	8
494	1	-0.000275243712540403	0.000168879923535874	-455.587450261503	6.66715040949492e-06	2.91279817197961e-06	11.6075155855064	31.5318237360701	0.759452009889557	0.0185021479743739	0.000337092340785356	1.7898956381809	8
495	1	-0.00055988100403899	0.000185947481085204	-425.684011310825	7.51209580214083e-06	2.1343129973457e-06	9.4515075852861	18.3723408266301	0.302616349616114	0.0338017481315376	0.000410286914060419	2.29984963831955	8
496	1	-0.000406122921448401	0.00014460311451834	-335.071318010131	5.34434845694215e-06	1.69580908458977e-06	7.13534582010205	19.5986536861813	0.319136320842652	0.0247001211774887	0.000290303707404324	2.08012799890526	8
497	1	-6.94132976481435e-05	0.000299254185417519	-965.826748834812	4.06555083583945e-06	1.40304444984297e-06	5.61444116262597	76.9409331604325	0.741019170311341	0.0176012100819776	9.43540785824227e-05	1.54990655795433	8
498	1	-0.000217931461391041	0.000135059999786086	-366.169545309236	7.3798986362037e-06	2.95661930368924e-06	11.883367521206	31.7879906858222	1.03448536505141	0.0146900079614909	0.000370325272544503	2.21542506762303	8
499	1	-1.34224749748224e-05	0.000226650435605199	-740.341754653417	5.35783912228842e-06	1.73956191184649e-06	7.00890299105277	86.6108426081087	1.34994335413714	0.0130088652223321	0.000101136788866552	2.00799601706437	8
500	1	-0.000337158177064073	0.000130646657678282	-311.79709929764	6.72125077510518e-06	1.54120294681353e-06	6.97085502530614	21.1810339119932	0.447140847597927	0.0207173310405153	0.000360497960281616	1.73899683795045	8
501	1	-0.000270750692115756	0.000233561318362826	-679.193885953714	5.51404772033397e-06	1.26414619239449e-06	5.81613070926493	40.7824833645844	0.597158898960999	0.0204872927976112	0.000243855193577748	1.6663573229646	8
502	1	-0.000254852642638318	0.000157470461416268	-430.308338240709	8.41699746480472e-06	2.40305909258358e-06	10.5859923373385	31.711433054628	0.932136430197135	0.0171645389816604	0.000416594886202557	1.38297063734856	8
503	1	0.000189658958086247	0.000317977025693339	-1109.02493887647	7.17135011341602e-06	2.44546163756287e-06	10.2162038203135	120.814170915681	0.972630348751409	0.0212133626489219	0.000242450372962557	1.57814651613783	8
504	1	0.000114682519082943	0.000276500119694095	-947.738872160665	7.05131243235438e-06	1.9802577551153e-06	8.7391047969733	112.526953420707	1.25511923112052	0.0171509143518165	0.000186927030756512	1.6347007704063	8
505	1	-0.000431112051307679	9.78665170825368e-05	-170.65248578289	5.24056973354928e-06	1.91598767236789e-06	7.95179183753837	12.7899224091928	0.285042950157233	0.0253293638397167	0.000293819218143886	1.72525991556548	8
506	1	0.000148031862383902	0.000246240278704812	-855.429768555967	4.86314254135801e-06	1.34566701962283e-06	5.73290808213506	121.012952927255	0.842598879164891	0.0164617168886423	0.000158040545151631	2.17868937336651	8
507	1	9.5838275626329e-05	0.000260335135288793	-885.365328476821	1.51754529877733e-05	5.5289745394016e-06	23.2695865016041	110.210388593943	2.96761316156412	0.0158947367212932	0.000422617588810609	1.94149556689758	8
508	1	-1.09031925438965e-05	0.000308140877348623	-1010.9167551533	7.66376231731846e-06	1.32034521380033e-06	6.43858377759261	87.9735035371869	1.42324613191058	0.0176662199908719	7.7180925150466e-05	1.70887134728676	8
509	1	1.04766028508096e-05	0.000243580698103946	-803.169410779943	7.59185820236751e-06	2.42100728133565e-06	10.2209576335585	92.4628198890108	1.78264975939756	0.0139690486937525	0.000139840193449728	2.00005749163508	8
510	1	0.000332503688028036	0.000277378547762555	-1023.5215084703	8.61267806652879e-06	1.67840860883693e-06	8.16872664521874	140.164732508557	0.749680328483645	0.0248096374077136	0.000383904993833951	2.02615394172038	8
511	1	-0.000417906751388161	0.000213888099174255	-564.227169879981	1.22148673549666e-05	3.75240296378359e-06	16.3746538922205	27.1037385468831	0.792155263679604	0.0268981650148987	0.00063065714741098	3.10384615746805	8
512	1	0.000108520887393562	0.000304288399639521	-1038.48990498412	1.31004131103451e-05	4.19826538271817e-06	18.00734334362	109.628179517337	2.20263678105003	0.0185100137489371	0.000338976468750708	2.09400515568002	8
513	1	-0.000203018257152722	0.00014874104119392	-415.888133283438	5.68374180718803e-06	1.65595974331449e-06	7.06204516977602	36.2283169268458	0.822977532043352	0.0144199155034528	0.000268613150076659	1.59963695086192	8
514	1	0.000172595125407122	0.00037178541625381	-1283.41852090226	1.76800408703551e-05	5.80153060952176e-06	24.9475963187892	114.902292458409	2.26743878707518	0.0234852216290449	0.000522340844004574	2.43615931529247	8
515	1	-0.000110706526572877	0.000183922397669393	-563.799159219182	7.71353991524114e-06	1.84525804047507e-06	8.24349130293231	58.9554336615318	1.78206247714615	0.0122997080822529	0.000245257879872374	2.22246905337092	8
516	1	0.000347766376597795	0.000313788980109165	-1147.31253446368	3.70988957462397e-06	1.07990846120368e-06	4.43792015816584	137.94012036352	0.319429018353776	0.026837733601468	0.000163167476428518	1.67847199251443	8
517	1	0.000146875601492688	0.00031572535083163	-1090.16960433415	5.23775972975098e-06	1.30134426886198e-06	5.94165793688919	114.947873945712	0.786610759771105	0.0199513521699828	0.000143502833551133	1.45189201335052	8
518	1	-0.000214544473160091	0.000342833145189998	-1062.19367787113	3.75725415331458e-06	1.89138944256018e-06	6.99622973088944	57.9617286142793	0.473080406607095	0.023172150068774	0.000146562498355875	2.42888544720341	8
519	1	0.000504570242772768	0.000253042484639981	-997.691915389608	2.11143217341026e-05	2.99680982825774e-06	15.2764913970465	153.366189065926	0.998503275372582	0.0323415040387545	0.00108412918199271	2.31964286690612	8
520	1	-0.000390258751358989	0.000189935406410824	-493.328936754018	6.24985148170646e-06	2.04660446985613e-06	8.62839391535548	25.9517681420717	0.435170368425448	0.0248677761245801	0.000326044761666222	2.9895007835595	8
521	1	0.000140302339557872	0.000372021858608707	-1275.17582878502	4.38277701773272e-06	2.34411656890569e-06	8.53478794043858	110.663198280009	0.602850714424986	0.0227807466673937	0.000153767709299051	1.24895497773256	8
522	1	-0.000301484836302496	0.000169553778121424	-452.234102969537	8.06821932918159e-06	2.50975260184468e-06	10.9166553376909	29.3532141175701	0.748661699463768	0.0198181770151109	0.000409044686002141	1.6258139287818	8
523	1	-4.76743953239304e-05	0.000256118598489134	-826.512849135704	9.76000497943215e-06	3.39417109028537e-06	14.3200096059038	79.4555354178384	2.11468960679045	0.0149265767327051	0.000216852443576353	1.27912114531924	8
524	1	-0.00042850335218256	0.000139555467836464	-310.370519131591	6.95400148426642e-06	2.34268161389907e-06	9.91380302002298	18.0394535414638	0.393909053699476	0.025820686398049	0.000381122602078544	2.43930537538578	8
525	1	0.000212152729573191	0.000328617831838849	-1152.52316942207	7.78381102951223e-06	3.43791692245195e-06	13.5941360678706	122.845924754946	0.996077742552426	0.0224112530942477	0.000293082710152954	1.72222790107424	8
526	1	-0.000147739576116307	0.000202917514707547	-616.396202641379	7.80640172209248e-06	2.40865132114939e-06	10.3613165355998	53.9424982555888	1.47647576760935	0.0143814115796772	0.000285928671939674	1.7966071550979	8
527	1	0.000230616754932386	0.00027202571421423	-969.35857146135	8.80424545429357e-06	1.34600258673695e-06	6.69214331113763	130.290463753306	1.08796834443608	0.0204331616403124	0.000331468130935868	2.40040597163379	8
528	1	0.000271498062022906	0.000323860592887355	-1156.30556247361	3.01726755739891e-06	1.1738023273488e-06	4.66560090032348	129.973698806842	0.329737987018075	0.0242136099327013	0.000122438182158168	1.39688358878477	8
529	1	0.00016800908498116	0.000293364712705528	-1019.0522962335	6.99489964812344e-06	1.21228248424364e-06	5.5949592748039	119.799636719388	1.03379120449252	0.0193698633373742	0.000208094422900214	1.73611755233335	8
530	1	0.00023476354216418	0.000399312602572656	-1395.81845854027	8.22703887246235e-06	2.34889207655331e-06	10.3387728853293	120.452087556199	0.889518616819531	0.02654003620205	0.000265581395245464	2.2601342045636	8
531	1	0.000346724374819638	0.00027587862910241	-1021.04185743309	6.61289204531782e-06	1.79379037027846e-06	8.01708419702856	141.491741314522	0.562507157540226	0.0253870599872243	0.000303316053171819	1.24848661481584	8
532	1	0.000564853949381866	0.000370495957910329	-1408.20754950388	1.00384586694441e-05	2.45163032404439e-06	10.7471494892145	146.738545908551	0.498298436732049	0.0387044377467873	0.000487067694406371	1.76132004241155	8
533	1	0.000322893964633238	0.000388846792009071	-1391.98435684502	4.18590096767219e-06	2.86647261490839e-06	9.55601900239822	129.70585571958	0.419953795658116	0.0289591652031049	0.000198596641409207	1.71045063791154	8
534	1	0.000186603387263985	0.000400797899734957	-1388.00314866367	5.7167629213154e-06	2.2310786938597e-06	8.89577899264391	114.965733500132	0.682643970989495	0.0253309400790727	0.000180395912360538	1.20462133262581	8
535	1	0.000118180706919581	0.000356072579158338	-1215.35355715523	1.00037540372785e-05	1.98630645245129e-06	8.77301677243586	108.361037095551	1.45312615885448	0.0214957964924452	0.000210394137399184	2.49365597068546	8
536	1	0.000203049989999412	0.000296267593196903	-1042.72214335686	6.25197997215902e-06	1.55895402550121e-06	7.03810359395511	124.425184302285	0.834589696667669	0.0205789797850855	0.000215494567156173	1.54925775058989	8
537	1	0.000195876993300649	0.000286064107293302	-1005.26110623335	7.05754631990589e-06	1.83027487674073e-06	8.23917063066768	124.400656033625	0.977406305978862	0.0198644112547299	0.000244294832328776	1.39495313766767	8
538	1	-0.000590924355501433	0.000103759569951563	-137.615760271362	3.84819074528657e-06	1.55417277554089e-06	6.34193634896779	9.95896343983785	0.159403169101625	0.0343754410916972	0.000217708078824508	1.68186090656109	8
539	1	-5.60422810610219e-05	0.00026267678052465	-846.237924685863	5.19829420241917e-06	1.50898940761564e-06	6.59263460664624	77.9564718729787	1.08657917057078	0.0153889920021868	0.000104936965429617	1.45667225037532	8
540	1	0.000143734265696069	0.000211570716160832	-740.160055802435	9.34191163312509e-06	2.56352200493402e-06	11.3762878026105	124.190913427193	1.76080292512229	0.0146549236322926	0.000324396395439803	1.63458169601682	8
541	1	0.000157426481100489	0.000311630498622965	-1077.18609507556	3.92619321449553e-06	1.11523245578653e-06	4.68665708595775	116.801551081564	0.580989328494795	0.0200040773847263	0.000116367325675552	1.72572630226039	8
542	1	0.00019943106959908	0.000339533354739357	-1186.60715874606	1.21087915028903e-05	2.22587629137269e-06	10.1645534852658	120.428618283324	1.52804141249502	0.0225614188606755	0.000368182009905425	2.43453714130941	8
543	1	-0.000233258558013665	0.000180467271906949	-512.66921960885	4.9138100352108e-06	1.48330213949509e-06	6.3654902918324	37.7283713838074	0.627046431581964	0.0168976887507029	0.000228668392890658	1.82025705658813	8
544	1	-0.00036256337897697	0.00019310215576802	-510.359579967304	6.95810759794805e-06	2.3840561532674e-06	10.0897926278342	28.0398756651777	0.542479151317381	0.0235359895295915	0.000357685390646748	1.85341282087273	8
545	1	-1.71992004820753e-05	0.00035677036563957	-1172.71488757927	1.25518050912715e-05	3.48926951510358e-06	15.5043689339572	87.240019456735	2.01127245059711	0.0204651746547881	0.000202668899014534	1.90729688751698	8
546	1	1.91648776239146e-05	0.00047690827544261	-1589.64944874548	3.9276717595747e-06	3.21469632848776e-06	11.5200273281798	92.3012309630192	0.471364611885558	0.0273468837011421	0.000184261641771382	2.46470360455808	8
547	1	5.52301554850553e-05	0.000272440635348833	-914.627478261018	7.30124156552099e-06	3.17885393220565e-06	12.8483897860487	101.459904251928	1.48061252848936	0.0159272235773358	0.000196905278754181	1.61171988077773	8
548	1	-0.000125917780998766	0.000346316999417992	-1101.41324370056	2.45965044892831e-06	1.34509139156512e-06	4.987206376879	70.0191837199986	0.366453800349901	0.0211133773057099	8.69767109220986e-05	1.47804283971854	8
549	1	0.000381246797185052	0.000319943465922941	-1179.59729754954	8.38175471430787e-06	2.46465288256536e-06	10.3794782517204	139.996523773662	0.657246624213886	0.0285165475331439	0.000378900657747288	2.12136500223478	8
550	1	-0.000199836835224184	0.000276520817317619	-846.640036743982	9.9624781812552e-06	1.91227781015007e-06	8.62575330588535	54.1450083058326	1.36901797521176	0.0195477308337786	0.000345934933171748	2.10423190249405	8
551	1	-0.000423775703324682	0.000160813114943299	-383.972863584511	8.80264417102598e-06	2.75874452266812e-06	11.9207110214119	20.7805997513336	0.5120112090672	0.0259700145362558	0.00047486693736126	2.78091712120673	8
552	1	-0.000199038422215265	0.000171652904491494	-493.474326672448	5.65675548555074e-06	1.68472986260895e-06	7.39887473756347	40.7748422405771	0.852016724531708	0.0150592024429557	0.000253407993687636	1.47688520442092	8
553	1	0.000113744668997389	0.00019408983560776	-671.189287876145	6.42070848760139e-06	2.06325671263078e-06	8.55104067600991	120.372066160596	1.43565715248101	0.0128894764404777	0.00021213231527859	1.44120751419662	8
554	1	0.000182578386245775	0.000270155448400094	-948.059145846696	8.88932334964141e-06	2.5190552589037e-06	11.1714753147278	124.051895405877	1.31770098070179	0.0186821871626819	0.000309247257878126	1.72076062927233	8
555	1	0.000120023232303923	0.000295020621918055	-1009.1068634419	4.30115061281765e-06	8.96350132529968e-07	4.15542695371404	112.137965336485	0.719273327072683	0.0182487495449095	0.000104342245365007	1.2738224754432	8
556	1	0.000158465913608835	0.000294392944842515	-1020.78994072	8.08125295872938e-06	2.71993543249651e-06	11.3636620280453	118.292703654124	1.23931809298533	0.0191558774347413	0.00025883113225235	1.89093911251822	8
557	1	-0.000577728519957993	0.000199870347446303	-466.791413379262	9.64257127954782e-06	2.83000137422461e-06	12.4495662605798	19.083519110683	0.387474382095008	0.0350263447587622	0.000524800341897303	2.51329826718347	8
558	1	7.66425801039916e-05	0.000291876103241747	-985.794874026746	6.60841018851826e-06	1.89320988232494e-06	8.36585695933206	104.712913900278	1.21699421110631	0.0172902049199593	0.000142319711975215	1.08061672987286	8
559	1	-0.000651091264366329	9.18996946590597e-05	-78.1476550435723	5.57245061788393e-06	2.97228161292653e-06	11.6292342474378	8.03406516552542	0.26527762624916	0.0376745462306758	0.000317038790566153	1.88879002588873	8
560	1	7.09079780523232e-06	0.00027923842753321	-921.267262152016	8.336722248449e-06	2.18363713907918e-06	9.88033796913285	91.4546189091404	1.70951310767728	0.0160043404214889	0.000125659253054234	1.1750011293472	8
561	1	0.000272733421134373	0.000305614825878165	-1095.26080142062	5.52553258680536e-06	1.44098259703925e-06	6.53477903636266	131.74600941811	0.59207202910933	0.0234691739368031	0.000219611018161763	1.34154159498589	8
562	1	0.000426406734102572	0.000459271013093163	-1657.37157445503	2.38894811104952e-05	6.84174426406413e-06	30.3409181260933	132.874937034105	1.65620317734355	0.0359072455308933	0.00097460937018453	2.95910194852722	8
563	1	0.000198072262648176	0.000341889468969059	-1192.91198978996	1.0045669857205e-05	2.18414265899644e-06	9.67647839227166	120.085681881456	1.27041075031428	0.0226387953719041	0.000308181764050413	1.38651933919767	8
564	1	3.16710854153803e-06	0.000257229118216548	-848.416710091607	7.8384216249864e-06	1.54294684532079e-06	6.93238029641522	90.7054130776136	1.74568776151257	0.0147392596038003	8.85703899876718e-05	1.9688144483379	8
565	1	0.000419159555664932	0.000373815417232109	-1370.3371086035	1.58751877997065e-05	5.69651700417633e-06	23.7975396712941	138.272740878285	1.16191639717523	0.0321792518529094	0.000712752406688143	2.69701106503224	8
566	1	-0.000416023732700523	0.000167984945358089	-410.106532643669	7.49826003821964e-06	2.78653060471916e-06	11.3232402217114	21.9882123383254	0.487257931667548	0.0257062519887086	0.000402828572312959	2.60992370374458	8
567	1	-3.06962259491876e-05	0.000311259474546517	-1016.10785288741	9.1918650096502e-06	3.02853313443201e-06	12.7573964303999	84.3677362742988	1.6765997049822	0.0179203679239492	0.000180254067870219	2.75962686332117	8
568	1	0.000258646799682195	0.000285504500737191	-1023.61657059034	8.1408544973047e-06	2.23985275972951e-06	9.84132068818791	132.174342600793	0.92475770036453	0.0220727089715922	0.000327284409155202	1.86231991624082	8
569	1	-0.000246367969842492	0.000312916351715873	-951.355399135761	4.87475723434084e-06	1.54680257864354e-06	6.6439988269002	51.7856325308974	0.567949299113484	0.0228188167635608	0.000186282340624222	1.71008243293186	8
570	1	-0.00011098845579706	0.000358417475294522	-1147.2969580482	2.44375816121546e-06	7.60261833986582e-07	3.15258580174821	72.7942067929372	0.358121492524338	0.0214978705174929	5.87098915915229e-05	1.52379482513744	8
571	1	-0.000348711873393412	0.000168839122056164	-436.437729017149	1.03161094629e-05	1.5236741353083e-06	7.7906218231273	25.8353117066644	0.695076838550435	0.0221984439865821	0.000533350852191776	1.15785877693934	8
572	1	0.000461693501981589	0.000391112417667129	-1442.58126199163	9.91084455759307e-06	3.07583019901155e-06	13.2848881581094	139.73120838417	0.646022872379112	0.0346689051266651	0.000448004554916163	2.12761877687246	8
573	1	-1.28853784779189e-05	0.00019198916221375	-622.924300515688	9.07674472529109e-06	2.40657684496636e-06	10.8677318351517	86.1603443008975	2.69707440765851	0.0110249155764564	0.000141916513152342	1.68255400060311	8
574	1	-0.000309306913124547	0.000208750782058847	-582.209751339226	8.94927323643125e-06	2.60684643239262e-06	11.3580484236795	34.015355913283	0.837230765706223	0.0213804360412837	0.000433151990169365	3.24773401386913	8
575	1	-0.000147438790717428	0.000202404851869	-614.863938699606	8.23927011663141e-06	2.5904741765687e-06	11.1591064977233	53.9290927563451	1.56323729135505	0.0143475219781806	0.000302736675503488	1.70750685631327	8
576	1	0.000134511306226911	0.000354066553376493	-1213.63053282583	7.92232478715096e-06	2.31530081043544e-06	10.1706705929122	110.801985398169	1.12719904656907	0.0217011425229998	0.000203383546981553	2.2155297211327	8
577	1	0.000101793172068345	0.000346678189109641	-1178.70345286776	4.47622900629603e-06	9.31213910791573e-07	4.18274664147426	106.363525477999	0.682340629712371	0.0207017513153289	8.85526843886319e-05	1.96819875428293	8
578	1	0.000541841821993284	0.000354398003700182	-1347.31560103805	1.40675694396028e-05	2.14221815210252e-06	10.8756963239178	146.812836359904	0.699655713351018	0.0370961031395325	0.000677878535771361	1.30648944141938	8
579	1	-0.000553369062242234	0.000112409948968024	-178.955509489288	7.79709334865905e-06	3.06467644223236e-06	12.5203962716125	11.4826733129709	0.343033759959313	0.0323532605382582	0.000439192145114944	2.25082287449212	8
580	1	-0.000483433302607084	0.000144889061289532	-311.434432088193	1.10088543507061e-05	3.55259948449553e-06	15.3129070562453	16.6839193818012	0.527267173989155	0.0289159575170572	0.000607027023867912	2.90916897084471	8
581	1	6.4437330680456e-05	0.000306150963612797	-1031.2129568681	5.83070025943001e-06	2.03096175363751e-06	8.43417833891303	101.885879641708	1.04772291587328	0.0179254839536895	0.000133044807750538	1.4607949376682	8
582	1	-0.000380216198551185	0.000286402239275745	-820.522597028148	9.92607340904952e-06	3.00476017981399e-06	12.9720871366536	36.9893089168852	0.774719129438002	0.0272736676925263	0.000465925406977633	2.16166782672264	8
583	1	-0.00040337513014198	0.000133463528464311	-299.835522415329	4.98900571871568e-06	1.81827374836881e-06	7.53887835166916	18.3076766087586	0.314404404357406	0.0243438964173777	0.00027334618281352	1.91525782022327	8
584	1	-0.000577860663285025	0.000134470006916331	-246.782046068437	1.13227942744796e-05	3.67967760814387e-06	15.7674406018545	13.0997759744932	0.425684517778147	0.0339935935337792	0.000633669859651512	2.91352380833697	8
585	1	7.05824032705682e-05	0.00038114383608538	-1283.29859874147	1.05914215603114e-05	3.44658949488819e-06	14.6768784096511	100.491507737963	1.54216635238565	0.0222092280135655	0.000223413614627643	2.05695973436407	8
586	1	-0.000715802237710272	0.000128785903825787	-183.465376722332	1.46420254176856e-05	4.26944399432523e-06	18.7647686019416	10.199438109345	0.388972333939422	0.0416709516339608	0.000826804011107542	3.22020829646798	8
587	1	-9.49110449643233e-06	0.000264227072374712	-867.409362463413	5.66413866364098e-06	1.29559066243554e-06	6.02469949472191	87.9428053134154	1.22668727739608	0.015148859278753	7.50931845912568e-05	1.77452618266787	8
588	1	-3.29689454990757e-05	0.000341197549700827	-1115.42538051781	6.02170073222302e-06	1.77957816106636e-06	7.69588516608006	84.4808069896805	1.00225166412624	0.0196402302281342	0.000106776820534772	1.83822805739109	8
589	1	-0.00048398019691875	0.000169205866415012	-393.634347193938	1.09091284724782e-05	4.85670330633647e-06	19.556604498854	19.2703005110078	0.65143252726373	0.0293758881212511	0.000597130999314968	2.99823291606639	8
590	1	4.23363919740128e-05	0.000282290634257126	-940.676391256502	6.60060379501256e-06	1.03195111723256e-06	5.33578904874967	98.5293357687438	1.31059682529133	0.0163549462976675	8.10261690400788e-05	1.22391581109278	8
591	1	-8.46472025731855e-05	0.000262124980017069	-834.755755709853	1.01863225010397e-05	3.76363658662473e-06	15.7255948227816	72.1033370334756	2.03058539483616	0.0157823250523847	0.000272536980820505	1.80285375521724	8
592	1	2.80105057847459e-05	0.00019129410177535	-634.824665078592	7.43212244307208e-06	1.38771056928893e-06	6.73074808805113	98.3304144873137	2.18013311475223	0.0110772200820293	9.99768819873556e-05	1.51203937267896	8
593	1	0.000179789393026717	0.000278120786294469	-973.819589076054	7.22274239702863e-06	1.91201127682241e-06	8.50286450910111	122.880387851269	1.06467414243537	0.0189748007962862	0.00024277196903892	1.7061640760284	8
594	1	-0.000259790784421825	0.000204460530315402	-585.174038335502	5.50730268327564e-06	1.50833558484164e-06	5.89253647068575	38.2034514552596	0.625016732099166	0.0189418973774877	0.000253656476415333	1.14345200589958	8
595	1	-0.000306180892727127	0.000156547164198976	-407.877933403681	6.35097440860611e-06	1.94701844895572e-06	8.46186790211047	27.0801967120848	0.561676617455018	0.0197028968372877	0.000327947436324606	1.68396424740945	8
596	1	0.000275609880582205	0.000356944500273556	-1270.10474103373	8.7712011772538e-06	1.18493307596219e-06	6.19614601341869	127.673040949446	0.886839601069337	0.0258384371898899	0.000311802938036748	2.21543212238299	8
597	1	9.86992692385434e-05	0.000267749020295982	-911.620095298106	1.02521444606389e-05	3.43359032609464e-06	14.599388329085	110.235201534124	1.946075997763	0.0163499988855165	0.000274499885563216	1.38808680272569	8
598	1	3.88380140508749e-05	0.000320401431245438	-1067.07075456696	6.9318546988772e-06	2.1330380130974e-06	9.14764870163772	96.9114874066512	1.22248817791653	0.0184920263181709	0.000130400115712033	1.90412556762755	8
599	1	-0.000105983135209484	0.000271751131092186	-858.992486685779	9.35158409873423e-06	4.08899072850236e-06	16.5808382126143	68.6941808640753	1.73608351767438	0.0167124135580252	0.000292477592013784	2.19078960143976	8
600	1	8.55125309949293e-06	0.000312124476208984	-1030.552672884	8.71059603001033e-06	2.9980689700932e-06	12.6856997891174	91.5693360191788	1.59785045523355	0.017890124933075	0.000172255377735448	2.323798592669	8
601	1	8.21304781147813e-05	0.000355123880785273	-1199.90165537182	6.20535601725716e-06	1.85899770197128e-06	8.11801837284027	103.022004858567	0.952620954990583	0.0208841642048867	0.000131098954306022	1.31032015947353	8
602	1	0.000282844890227798	0.000363589369036869	-1293.44416424532	2.37544109456447e-05	3.80564581193074e-06	18.7080859011062	127.880202769502	2.35008064781623	0.0263933013767712	0.000853225513054168	2.65713928348951	8
603	1	5.99650299610734e-05	0.000282051365712098	-949.533261738425	5.07584345679979e-06	1.28574364672865e-06	5.62719026007293	102.002558013677	0.987943377475681	0.0165215410792143	9.40738261589641e-05	1.86625741677381	8
604	1	0.000213437818105651	0.000397862327271178	-1383.67381705801	7.06131058404944e-06	2.16519650273406e-06	9.31051249884043	118.21184484829	0.800253018092641	0.0258689084144237	0.000220297627135205	1.84190003033806	8
605	1	0.000138011118054893	0.000325428653892348	-1119.76514280043	6.56725940780621e-06	1.42446990085574e-06	6.17111121062751	112.981327180222	0.984131143817297	0.0202531355648716	0.00016501002859173	1.41515552411294	8
606	1	-8.04872418827627e-05	0.000214761664836939	-678.539967046924	9.57885299748002e-06	1.28481469832788e-06	6.86235718047292	69.4552720805392	2.24361759159886	0.0131407051636643	0.000204568560131255	1.32292766468213	8
607	1	0.000594020644308436	0.000365218140807249	-1401.83209455716	8.94536065050527e-06	2.86827451592472e-06	12.2114865728841	148.415802118977	0.434168937925988	0.0399530606150904	0.00044501399335108	1.48073204992521	8
608	1	0.00020140242717661	0.000374366219221325	-1303.45216067431	9.07300571622236e-06	1.95967598632935e-06	8.9140726535889	118.279468261736	1.08416004601069	0.024356636153982	0.000265396275289588	1.5303359770079	8
609	1	-0.000103368506373961	0.000296834831739483	-946.329991159203	3.94759363928293e-06	1.89670003841096e-06	7.42494758206553	70.8000548503797	0.689011084014461	0.0180091088401184	0.000126749229580692	1.43342331722506	8
610	1	0.000482853659902091	0.000397246623158411	-1470.1613050064	1.27931471477516e-05	3.1964960942021e-06	13.6854887822662	140.555662358256	0.778385267638006	0.0358248675542541	0.000577883719378211	2.51471460532063	8
611	1	0.000200546794971133	0.000382532052354847	-1330.50840265696	3.11200495656614e-06	6.75818973538946e-07	2.95189048476259	117.666288543171	0.367987092188862	0.0247468533827373	8.96124706999757e-05	1.39729523228931	8
612	1	-0.000271625287886571	0.000156716724326778	-419.963943980007	1.14940531022745e-05	2.92766997933659e-06	13.2891176411719	29.9831946511335	1.14721419108959	0.017967541932137	0.000576553599961516	1.64030291704204	8
613	1	0.000145363655980549	0.000356660885163925	-1225.58254036952	9.20477366579033e-06	2.01290709212604e-06	9.27847729941498	112.174249548395	1.27308726972026	0.0220672494928635	0.000225893967816249	2.14653497595564	8
614	1	0.000293400053382448	0.000314160459451687	-1130.65863113625	3.33378730314305e-06	8.74249965073014e-07	3.75662059405081	133.042958681123	0.334352973459467	0.0246292133230668	0.000135416743711433	1.66691124757674	8
615	1	0.000348039155107946	0.000336614284273108	-1224.63711544464	3.99889841002143e-06	1.18687324081875e-06	4.766250086302	135.956010871179	0.344116674233937	0.0277420693595616	0.000171344042840673	1.85603249139685	8
616	1	-0.000135508432516776	0.000185203272326402	-559.866945943186	7.09550559133783e-06	2.11405262326365e-06	9.27465750178894	53.8080332866136	1.46329704124775	0.0131484495879306	0.000259200350841505	1.6632820846266	8
617	1	7.36357816893102e-05	0.000355588871759614	-1198.32028609432	1.39994568291405e-05	3.83197695411299e-06	17.0883997480403	101.699515853839	2.16644060209934	0.02080599516853	0.000269588709545389	2.51561121168139	8
618	1	0.00021441708596565	0.000338981845004694	-1189.98427322149	7.22748165880018e-06	2.56230587909298e-06	10.5965766493631	122.314689373233	0.8941880126127	0.022981490778875	0.000253766352229356	1.88912329154568	8
619	1	-0.00028258293498846	0.000248256830989255	-725.170748044634	3.8657264558593e-06	1.06520683761612e-06	4.6524557360373	41.3001895807895	0.407306804614747	0.0215514825015646	0.00017120306800013	1.60351793892177	8
620	1	7.10012572438297e-05	0.00023848370993652	-806.271151270717	9.13113109475354e-06	2.29450297386862e-06	10.4921489496201	106.579296190888	2.02077231471084	0.0142568267177978	0.000195349997258109	1.85280876704531	8
621	1	0.00027033935960086	0.000413207669578085	-1453.63361450483	2.44159794434504e-05	8.76320978420446e-06	36.8022400478243	123.194547005256	2.43525062666139	0.0282918128229994	0.000873571199711345	3.43873259844817	8
622	1	0.00022334558431007	0.000422149931140756	-1471.36047520344	4.28904326646714e-06	1.44788124708106e-06	5.59449568872409	117.881838286063	0.462013540962468	0.0273639856256125	0.000136323062119045	1.37742560051021	8
623	1	-0.000196137603551012	0.000130912794101709	-359.023272120679	4.92016641359024e-06	1.6864964293655e-06	7.00284575085191	33.721279926788	0.746061151450929	0.0135111317233338	0.000240531908981456	1.75154782944234	8
624	1	0.000224651541881289	0.000280602968679331	-996.084406249884	5.77159355776452e-06	1.5252934714628e-06	6.91420307397622	128.680864177477	0.734068095620251	0.0205951295465638	0.000217642864099741	1.12875454493747	8
625	1	0.000199129398777823	0.000223757582154106	-799.863049434922	1.77377690491477e-05	2.31966532260325e-06	13.1337078705683	131.666960821348	2.55171224788727	0.0171619719038745	0.000682891358657786	1.58292556953299	8
626	1	-0.000332757789943734	0.000120746702619575	-279.849844278221	5.96048826307787e-06	1.96788037295712e-06	8.26382062538668	19.9441457897389	0.44490797424334	0.0202820182890946	0.000323324447633992	1.88001758876516	8
627	1	-3.35988276004214e-06	0.000144865981224939	-468.029764939462	9.03789916636217e-06	3.10853904178374e-06	12.8723246332336	88.6713747859113	3.57276110432541	0.00830244135369185	0.000178462648642666	1.63004316322126	8
628	1	0.000638512424655389	0.000400165572079273	-1530.88135558806	1.88074831726439e-05	4.7795919490648e-06	21.8873202983419	147.923994133518	0.819465790329248	0.0431749603184528	0.000924597237106172	1.79311404605574	8
629	1	0.000293949209067905	0.00025750979228405	-942.222974806404	2.36943601477799e-05	5.77896926296647e-06	26.7305224362901	138.780505914628	2.37620430045466	0.0223906610009408	0.00104421276036608	2.56681730407897	8
630	1	0.000132422548839523	0.000339931684358698	-1166.39747818191	5.48180992807532e-06	1.42961865684622e-06	6.44782262794735	111.283717264447	0.806352466999441	0.0209023036797475	0.000137198110674143	1.56922175079251	8
631	1	0.000109438314456889	0.000253764696456138	-869.293063937095	5.43180924710269e-06	1.58315364288782e-06	6.92658276791716	113.328556861406	1.04222360327093	0.015834097073224	0.000148750582946466	1.50815495117345	8
632	1	0.000215390692679483	0.000217587994212522	-782.481505531895	7.46262679486696e-06	2.26242785866441e-06	9.73702003616556	134.709235056577	1.03624156074131	0.0175420252566028	0.000314595279541015	1.68529559684987	8
633	1	-1.40795732032482e-05	0.000302417368361938	-993.335688675758	9.89101189568838e-06	2.46484408767776e-06	11.0803030865798	87.3344188739996	1.87001687464977	0.0173460068262443	0.000143513182222956	1.87576527262713	8
634	1	-0.000175892302703075	0.000244097000069509	-744.810700973675	7.56261823014127e-06	2.75545845175115e-06	11.4396184371678	54.2240959135845	1.20803778807929	0.0172384559940326	0.000283859276586247	2.20675518468864	8
635	1	0.000307765249044562	0.000369090512261162	-1320.44317115836	4.55915654265839e-06	1.04298965991196e-06	4.63526294802647	129.822957084503	0.424999589837143	0.0275346145329536	0.000173471777398085	2.00701380096076	8
636	1	0.000285004472131395	0.000344900230924072	-1230.72111319742	8.20866430527277e-06	2.8756348307667e-06	11.7438951666978	129.568246466044	0.843595462020594	0.0256352158964432	0.000325403746604834	2.2814821269165	8
637	1	0.00042870143422982	0.000399640576082825	-1459.03710839245	1.4284186771934e-05	5.19782649762066e-06	21.9213521267857	137.009293103538	1.02216347213468	0.0335802851048186	0.000632152984952663	1.94611755856241	8
638	1	0.000133384391614295	0.000274131846306865	-944.401907011365	7.68574132412187e-06	2.15501987583181e-06	9.54450497713536	115.946174601979	1.31090567395396	0.0174671950990728	0.000222370733796244	1.31426886153117	8
639	1	-0.00023310792016954	0.000278529983236019	-843.318007723026	6.38313399708151e-06	1.80472997328918e-06	7.76184901767529	50.0732900597496	0.793512888562121	0.0208101428152077	0.000247758387050926	1.70522056743889	8
640	1	-0.000537476405577444	0.000199398778972346	-477.602010362039	5.71480278848239e-06	1.76322937691602e-06	7.54526308046745	20.354388324194	0.258392991948252	0.0328460612111598	0.000308993283279653	2.50968476318078	8
641	1	6.60531278071668e-05	0.000161011262963521	-545.001240628376	5.8767189214967e-06	1.7219096661034e-06	7.0173525245077	112.305359843211	1.802865620472	0.00997138219318572	0.000157045191477909	1.65677913943486	8
642	1	-0.00011016646012648	0.00026974457239824	-848.999344824703	3.09804700636084e-06	1.13982257243569e-06	4.61430008437522	67.7843900490219	0.570308936856757	0.016694497560394	9.03300293844847e-05	1.95638720939175	8
643	1	-0.000130812054510738	0.000220253778280216	-679.58502179461	1.06924923465434e-05	2.35965310956631e-06	10.7649176348071	59.2932821719975	2.07378641640214	0.0146775100216985	0.0003337363067985	2.69553154714014	8
644	1	0.00033497858577513	0.000351154362972762	-1269.05797518593	8.66372767053606e-06	2.09359983869325e-06	9.51832192284705	133.649486052606	0.759522309797225	0.0278058727608936	0.000353456664527558	1.69043128942533	8
645	1	-0.00046516707149695	0.000212219124265323	-542.925397385356	1.10391327434083e-05	3.19984481769854e-06	14.1576339330174	24.5234816224683	0.608333419548956	0.0292947507931842	0.000580448727897395	1.72404470768486	8
646	1	-9.51551776705488e-05	0.00023249329526982	-733.217606972666	4.74417101042295e-06	1.38470795683475e-06	5.85123776210567	67.7416281331167	1.00852893046125	0.0143934065789892	0.000126461198715925	1.70624960383814	8
647	1	1.12288196398239e-05	0.000203604451660448	-669.577891400534	6.44401169911866e-06	2.23940560930657e-06	9.38688610613696	93.1566740519147	1.80822517685958	0.0116834029597612	0.000129717038014903	1.69045217375413	8
648	1	3.32919834351607e-05	0.000282465735689643	-942.069692326712	6.13762104127338e-06	1.49386348651626e-06	6.91089726982067	96.7219849804557	1.22841211638009	0.0162961167078777	9.44456010728366e-05	1.41098315229613	8
649	1	-0.000662072485047991	0.000118490408680701	-164.415513983839	4.03173446116371e-06	2.46490082456633e-06	9.28536399950488	10.1467418576867	0.215366221898294	0.0385366751534093	0.000228745464037537	1.53626652211383	8
650	1	-0.000427784862445641	0.000245781000463131	-668.487774035839	7.09415957105691e-06	4.49407501117106e-06	17.1970850176881	29.8792402176704	0.610933551130825	0.0282676815234879	0.000375055087641262	2.10529371727025	8
651	1	-0.000494409994465709	0.000158978067222375	-353.997665570316	7.58664750283434e-06	2.5301820927547e-06	10.8451367703503	17.8252505716331	0.369138875260875	0.0297560554786855	0.000416188305772417	1.97099274614226	8
652	1	0.000413747306779785	0.000258698079310796	-984.82318612503	8.83641532695852e-06	2.2714769867594e-06	10.2162954903432	147.984061146752	0.594734655939431	0.0279584319733885	0.000434792476267288	1.48952724989942	8
653	1	0.000200626258273437	0.000269278278861644	-951.43019847963	7.78443724644146e-06	2.5741082283453e-06	10.7650022674324	126.688018137245	1.09694643557092	0.0192399260165814	0.000291541634286585	1.61311806162491	8
654	1	0.000118672488240985	0.000250301006386684	-860.766216140493	5.44096729705357e-06	1.59935192548351e-06	7.00930847263579	115.366523618733	1.02672009806462	0.015871422110024	0.000157138723947077	1.57327207613354	8
655	1	0.000523311997307235	0.000365456149810426	-1378.11474886171	8.15981796434266e-06	1.90333502357235e-06	8.6676394003084	145.071387815523	0.442150233398097	0.0365712965843841	0.000388358404598396	1.87823128557471	8
656	1	-1.92415948701007e-05	0.000327998260123033	-1073.08895098298	7.66922421738033e-06	2.40189529424551e-06	10.3948398947641	86.6426648139288	1.33531517828642	0.0188252247860135	0.000139771574944551	2.14296709259612	8
657	1	-0.000302521694521585	0.000328199981942341	-986.859869477637	8.36468250592303e-06	2.7286405373774e-06	11.381305588973	47.3313697327447	0.824406365268907	0.0255743726289381	0.000344563719616437	2.67554789904431	8
658	1	-0.00011987795234012	0.000314155215850091	-995.228914021231	3.5502106904946e-06	1.42930747946813e-06	5.63813632913335	69.1137311654086	0.571822465920351	0.0192657188020462	0.000105418881878578	2.14862572874057	8
659	1	-5.00722700371759e-05	0.000250522715719437	-808.494015612536	3.96207479953732e-06	9.69884566380982e-07	4.23630687356885	78.6971648349696	0.872379715326723	0.0146377945586664	7.03494136936435e-05	1.63492042201022	8
660	1	0.000325667852407501	0.000305660861231677	-1112.95520129602	4.4373203322563e-06	1.15980075971299e-06	5.24798338845993	136.815112512236	0.404376052662788	0.0255906380315309	0.000190875238940855	1.03282086277732	8
661	1	0.000133612043311637	0.000261451535710507	-903.344019827228	9.71993097957362e-06	2.69116381073387e-06	11.9378577227012	117.068823708514	1.70580079375719	0.0168228330050226	0.00028823205645458	1.78680548466397	8
662	1	-0.000312423887396696	0.000239206237698924	-681.802006921254	6.09801603365386e-06	2.0945911859909e-06	8.81439212667255	37.4393460790414	0.59163308405438	0.0225448731449944	0.000286848291277244	2.22492719183995	8
663	1	0.000458741567273152	0.000292611511595865	-1112.9748840976	1.05878260161791e-05	2.93691903866002e-06	11.3088820174348	147.467948600935	0.653800192688236	0.0311757105475294	0.000519394365884639	1.45361347303772	8
664	1	0.000427842563289357	0.000302724379422792	-1137.27357792392	6.64321868922088e-06	1.66006627757371e-06	7.4038584992627	144.718293823799	0.444864324387532	0.0300292891749052	0.000315534721393906	1.42176094443011	8
665	1	-9.85803094686269e-05	0.000286087081320175	-911.113991364457	3.78088604451288e-06	1.22379077784686e-06	5.08437272042749	70.9869973446102	0.681043412478421	0.0173374311530097	9.68266675767725e-05	1.6455165693793	8
666	1	-9.49187953055544e-05	0.000255943787267213	-810.87152514651	5.4026720674648e-06	2.10520871293606e-06	8.27110318034103	69.6522993050875	1.07426042075994	0.0156404671085113	0.000156126366006302	2.01885701456992	8
667	1	-0.000156000928480135	0.000228132621075106	-698.064844059315	4.15030238003023e-06	1.26152827053e-06	5.2228074257657	55.6350220201163	0.725420920615017	0.0158348762497269	0.000146889489253722	1.47057289659129	8
668	1	2.40847430008705e-06	0.000261282313175491	-859.117591707807	1.08905323304071e-05	3.03144538321037e-06	13.4723996624538	90.5281318222704	2.38795565778362	0.014971009471509	0.000173776842333755	2.72026538076804	8
669	1	0.000378355883836342	0.000370457197276659	-1347.83282286353	8.92239592162467e-06	2.51888564205297e-06	10.7064204852681	135.604349244405	0.702939731363564	0.0303392734575141	0.000378974526156856	2.03428717939842	8
670	1	0.000457987183318299	0.000374340188322268	-1387.52834027435	4.69953743779534e-06	9.78344102337149e-07	4.0731441016379	140.738826094959	0.297282911259409	0.0338909623724533	0.000211479097587211	1.62853230477474	8
671	1	-0.000172097153218812	0.000164831673248394	-479.473158905307	8.74917357484033e-06	2.30137149212354e-06	10.3112671174449	43.7646743162516	1.50893942920591	0.0136535864886866	0.00037333780659296	2.25106141830446	8
672	1	-0.000458292522486169	9.17808282991199e-05	-141.61101460877	3.69846256059465e-06	1.32916162352915e-06	5.51689830900225	11.3246364637773	0.182895655538602	0.0267796161407432	0.000208317959432251	1.27335262426187	8
673	1	-0.000483109986810466	0.000149175965404128	-325.227544378692	9.12381406780025e-06	3.00489644783705e-06	12.8850662987816	17.159778699416	0.445985152530112	0.0289697277225969	0.000502062039413828	2.26424360460558	8
674	1	0.000292034671108168	0.000321478161120581	-1153.97266741747	9.98358481378499e-06	2.72610675750034e-06	11.1998504332088	132.252389429219	1.00440783536133	0.0248846087091579	0.00040162339522967	1.62447963892913	8
675	1	-0.000100746311341856	0.000233793430284946	-734.021404378169	4.34066243735738e-06	1.42637996613178e-06	6.05301943223535	66.6878139102808	0.906119495300042	0.0145861579397888	0.000123773263169331	1.2163590548765	8
676	1	3.71162858595221e-05	0.000265690592579585	-888.015091517751	1.18026109338223e-05	1.48028352721602e-06	7.15179929826107	97.9526054563248	2.49687856222877	0.0153707722283798	0.000125734918024355	1.92156924228652	8
677	1	0.000259583316404508	0.000441111980000371	-1546.44178285977	8.48987086962607e-06	4.36775708920678e-06	14.6409024944893	120.475741954577	0.855806275733568	0.0293253228302603	0.000327691611139457	1.64540937472976	8
678	1	0.000464703153877828	0.000424791231032927	-1557.7508216269	7.29520261679318e-06	1.69348308545886e-06	7.79055051173839	137.569158303142	0.462142847518351	0.0360734385478452	0.000315380273947851	1.41526257625682	8
679	1	-8.63319283160416e-06	0.000310730218155217	-1022.53121581977	6.77571056083419e-06	2.35354538295322e-06	9.77324558790724	88.4085284714828	1.24847283537543	0.0178103996807693	0.000135226709654668	2.3310673888819	8
680	1	0.000190606554847501	0.00020075886666804	-719.653612217113	1.08126254437775e-05	2.98421144975695e-06	12.8228106960078	133.514037868204	1.67772921346294	0.0158612039299442	0.000444215168651155	1.76724171097305	8
681	1	0.000207375386315698	0.000399844403386068	-1389.32262562766	1.69795011977378e-05	4.97173140147148e-06	21.8980931815996	117.413070286297	1.93932288815323	0.0258072854571481	0.000514356374777591	2.49749957234492	8
682	1	0.000250739044051648	0.000299274615713899	-1067.68589786293	7.31388003485458e-06	2.05109825470079e-06	8.91492990464969	129.9570367876	0.845129213810123	0.022369973849635	0.000283798243277784	1.69945294115661	8
683	1	5.53392745524553e-05	0.000234463830975815	-786.275456714404	5.36798307152738e-06	1.98069418772566e-06	8.13486678027086	103.280181278811	1.24725417723863	0.0138028994518038	0.000131114196528151	1.21473394598524	8
684	1	0.000110453227416482	0.000363453766307105	-1236.45986214958	3.46131131841625e-06	7.65031389557491e-07	3.4154367766621	106.903973087721	0.500642799022425	0.0217647460156059	7.13030323391634e-05	1.47149572433898	8
685	1	0.000197651814803014	0.000415020897654341	-1439.08426010192	8.52565085769093e-06	3.79503633548929e-06	15.0031150096174	115.465912634331	0.980728490581349	0.0263379017343652	0.000287495689078854	2.48107617216437	8
686	1	-0.000225171559322187	0.000260656560186428	-782.133727751539	7.78624588396484e-06	2.82541605536148e-06	11.8072036295946	49.1774790610321	1.02713352782044	0.019735386677695	0.000316320785906719	2.39782198593413	8
687	1	0.000672748501011914	0.0003161273287568	-1263.47691545233	1.22178329775604e-05	2.53472550315056e-06	11.2737639666726	154.830972667024	0.43781901378874	0.0425891839255144	0.000636570492787669	2.13964364132235	8
688	1	5.62077844208112e-05	0.000198942340154419	-668.61723702067	1.0687622699355e-05	3.366796491684e-06	14.3838775920501	105.776739153827	2.86178196863498	0.0118447669699719	0.000249360743791271	1.96258792088109	8
689	1	5.61577222937565e-05	0.000250339230069228	-840.358598790378	4.23394873495707e-06	1.28649412117751e-06	5.26835783599734	102.643648693101	0.924747661556302	0.0146998479868046	8.94006008203221e-05	2.40995197689355	8
690	1	-9.64319390778538e-05	0.000278775834254506	-888.657448623238	2.5946503100216e-06	1.51161162309924e-06	5.58569152462633	70.9188769939808	0.485854755855467	0.0169012915393125	9.51909751487982e-05	1.05379933020152	8
691	1	0.00030340336413948	0.000357798263169194	-1280.30767160762	8.65357935606117e-06	2.06630214260733e-06	9.20636771248939	130.297053770124	0.822459249107972	0.0268785711558905	0.000333138402267417	1.70156997600962	8
692	1	-0.000220698776235531	0.000167564691235381	-473.865195641504	6.08922623386655e-06	1.94851886298051e-06	8.10968280957071	37.207444660583	0.826210305938226	0.0158768116205579	0.000285954848554914	2.31862352012187	8
693	1	0.000248207680400257	0.000406162331378127	-1423.0786164561	9.09808740220028e-06	2.7265718686131e-06	11.8891206492084	121.429295159014	0.950001458550684	0.0272727223066624	0.000302746501261041	1.89007310853794	8
694	1	0.000488978396706715	0.000352236699267424	-1323.00916073279	5.89453389212931e-06	1.52396902392919e-06	6.46061033526829	144.232822205695	0.348022466064614	0.034528514994804	0.000278747125172805	1.74833608730372	8
695	1	0.000219175499727673	0.000351656526830134	-1231.79546347664	9.7643193402795e-06	3.67999485473464e-06	14.9751555851003	121.933877490232	1.1769962779758	0.0237414928715509	0.000345812423517269	2.111900357294	8
696	1	0.000172150995401035	0.000303556954761714	-1054.92413062954	5.31432385978807e-06	9.29342385156116e-07	4.49261771752735	119.558121491743	0.762693813109075	0.0199947314290227	0.000157185071004549	1.3116408361079	8
697	1	6.66140650806938e-05	0.000353260955063737	-1188.07145840178	3.27017600642018e-06	1.2056928042496e-06	4.83432679033208	100.678812834721	0.513417488276431	0.0205970736791699	7.62482515144855e-05	1.72496742422478	8
698	1	0.000231350826882881	0.000307084937416907	-1085.77697074936	1.89232302243188e-05	4.79831012354417e-06	22.0948257551552	126.993540936846	2.29305048370463	0.0220290424924485	0.00068836453324775	1.7302466165148	8
699	1	9.85539749727315e-05	0.00031445905124919	-1070.40256834911	4.17261984009896e-06	1.0539403763533e-06	4.78696397856583	107.401407202747	0.694436815026035	0.0188813173491837	9.18279791884074e-05	1.23425525303244	8
700	1	-0.000456306328607378	0.000170587306863535	-405.986524742717	1.29793284797805e-05	4.05667884743376e-06	17.5783222844901	20.4979466667309	0.696767495831648	0.0279116586662838	0.000701314437902962	3.21027146059186	8
701	1	-0.000625701249063126	8.52569875308514e-05	-66.0379131077321	1.39845943272357e-05	4.16370311042729e-06	18.3160429488835	7.75924069664839	0.411660105834815	0.0361813071750419	0.000794574767581275	2.25143164748783	8
702	1	-5.43128808101686e-05	0.000405274951705885	-1324.76179633079	4.35754129403949e-06	2.93014727842039e-06	10.8516077806619	82.3669914635918	0.607631069035422	0.0234281354339032	0.000169669927206547	2.80765010191685	8
703	1	7.34370931922682e-05	0.000296543930081147	-1002.74862421669	1.66561802480861e-05	1.43997224730536e-06	8.9819761811876	103.909082668461	3.03290799131707	0.0175039594234079	0.000242980538576606	1.81890883215779	8
704	1	0.000491191914773887	0.000405731491588658	-1501.95230145799	1.19214500363613e-05	5.34806094114963e-06	20.8672300099216	140.442810227676	0.776984720696346	0.0365027373533735	0.000561616376244855	2.19046372589382	8
705	1	-0.000308034849412293	0.00014431463757381	-366.507569059026	5.01927610142228e-06	1.40490485179581e-06	6.13531655919102	25.1031375656394	0.417806053598711	0.0194900143801817	0.000262649358137353	1.66024693947911	8
706	1	-4.69031909020529e-06	0.000240094831977225	-788.034339913147	5.62845790930759e-06	1.40952059263432e-06	6.30350548996871	88.880853417487	1.34266829295167	0.0137590449822369	8.09894703790257e-05	1.97154346898979	8
707	1	-0.000498586845278073	0.000127764881500596	-247.737511793644	1.28549856086617e-05	3.96433795314253e-06	17.2524204523687	14.3729946137232	0.555820722201601	0.0294899468213146	0.000715707259471218	1.43656357846275	8
708	1	-5.32001433275246e-05	0.000301102792790666	-972.315976488304	2.05791307771196e-05	3.21541401635924e-06	16.4686991285126	79.980144339413	3.79883202610782	0.01751912889344	0.000273860945205479	1.45174629544664	8
709	1	-0.000482035619008619	0.000245727579661917	-651.541334055523	4.5845207326105e-06	2.12698656258228e-06	8.27377623790968	27.0111493146838	0.298134729400195	0.0310001579886148	0.000240476726547346	2.34004720870572	8
710	1	0.000458503713177447	0.000412854300372207	-1515.15807741359	1.0988300508481e-05	2.88431292599267e-06	13.0915102075639	137.998916338423	0.711225325022839	0.0353508102505202	0.000480754144974699	1.90727043732554	8
711	1	9.55994997017953e-06	0.000256340229537967	-845.912456451007	4.23705718294324e-06	1.47568971647613e-06	6.17912471812739	92.1357984123085	0.945808483773971	0.0146974232035575	8.49750670091413e-05	1.20561659012236	8
712	1	0.000285398388381846	0.000294202645766287	-1062.71047100496	8.36942931973317e-06	2.03753056975057e-06	8.35576658518429	134.129732408221	0.862823344275054	0.0234847997285499	0.000344245550219595	1.58446606459876	8
713	1	-0.000273446420842887	0.000213650991543662	-607.684192015934	7.848508067324e-06	2.62059371145281e-06	11.2357846192284	38.0014615515224	0.867642149947417	0.0198825173175692	0.000366210639417633	1.83775702244877	8
714	1	0.000286334591144205	0.000418625771075773	-1477.97108920023	5.94461328344562e-06	1.86141112402453e-06	7.95236668982051	124.371621025333	0.566866812624051	0.0290594676334877	0.000211481060119339	1.55911666893558	8
715	1	-0.000446463504023986	0.000207157287290731	-532.926882506389	5.93926465954859e-06	2.33222811265202e-06	9.40782906926777	24.891112310942	0.381232305720326	0.0281999887034488	0.000313766448766923	2.69405552529183	8
716	1	5.40653340905582e-05	0.000323272724457355	-1084.82200313638	5.43996495889416e-06	1.63664123162121e-06	6.89136158470591	99.4944885139978	0.939113524175581	0.018779412373334	0.000105817791988357	1.56261009144449	8
717	1	-0.000159787973264839	0.00023679565994666	-726.672169337786	3.45031406017057e-06	1.57304754402588e-06	6.21404202956837	55.9888120340572	0.600175940941866	0.0163673872469303	0.000133450886640669	1.37205084554976	8
718	1	0.000196080047177742	0.000333695582989436	-1165.15709762371	3.76251310584777e-06	1.51570108137927e-06	6.0378687271541	120.438561684262	0.493489017384133	0.0221757696159273	0.000132415169418779	1.80338675823722	8
719	1	0.000226735089362815	0.000386767404620471	-1352.38235551034	6.47424612278494e-06	1.81453174823395e-06	8.06914521993708	120.380159006099	0.723360143683504	0.025687289668582	0.000207938152023866	1.39104556943068	8
720	1	6.22344154792444e-05	0.000274058283361319	-920.029447591416	6.51889062105461e-06	3.8752924105307e-06	14.5826428805946	102.794016130692	1.30778959375112	0.016102159115519	0.000231785145922721	2.69597088369579	8
721	1	-0.000326050560620321	0.000241614538665762	-685.952147544543	6.29945120760606e-06	2.20302860300626e-06	9.25802569806888	36.5397018861145	0.585536166213405	0.023251537668898	0.00029956835822249	2.23881164225869	8
722	1	-0.000205885768790916	0.00022319436824105	-665.252623965959	7.83606148115196e-06	2.20125759522552e-06	9.09698347613197	47.3099934625464	1.12269827544294	0.0173979905941053	0.000318220678168757	2.18713500529597	8
723	1	0.00016976896877146	0.00031124598898994	-1080.36121338315	1.05659423625734e-05	3.22356665058954e-06	13.9585015808505	118.610236826269	1.51965957597174	0.0203133989227524	0.000332152921403421	2.36963934122071	8
724	1	4.51456921898549e-05	0.000301164386241894	-1006.02562462578	8.50230058407851e-06	2.57657056619369e-06	11.2465096831167	98.5253761338164	1.58362395620277	0.017448245594295	0.000162880654238735	1.87166109831649	8
725	1	3.59490284707198e-05	0.000298567619971655	-997.144503918169	4.68376130515066e-06	1.14379283201495e-06	5.2436824508869	96.8656466012718	0.886362584061836	0.0172302185418971	7.25433171534927e-05	1.21946131754198	8
726	1	0.000574403569719452	0.000380931727718696	-1445.60237399914	1.31810061078706e-05	3.45321568052891e-06	15.5990281123419	146.448543648902	0.651134247341573	0.0394903981745074	0.000638817875276309	1.782761818361	8
727	1	0.00029111013794812	0.00029722094072219	-1072.23354114829	8.34084732665066e-06	2.41168882788729e-06	10.5907802207404	134.404908849591	0.852911550193713	0.0238370674697705	0.000348661933297087	1.63492054335652	8
728	1	0.000230005490135009	0.000288954085813919	-1024.96119431967	6.10885163941564e-06	1.83786234144869e-06	7.95906865650449	128.519551353797	0.762457142112158	0.0211604551547566	0.000233030661030238	1.37904676920662	8
729	1	-3.03742468633527e-05	0.000256043373756204	-832.181631051984	7.00180688756411e-06	2.33471668057557e-06	9.93031270079675	83.2346594193782	1.54628500283249	0.0147730699734154	0.000140994305895629	1.46715218565533	8
730	1	0.000320235449136446	0.000323618766377874	-1171.80742130331	1.12532066362971e-05	2.6992143095936e-06	12.3421357405031	134.698925611107	1.03461026432612	0.0260856188360776	0.000466646057202563	2.18332470544314	8
731	1	0.000209752475433883	0.000318318144708804	-1116.82909946277	5.26822298280278e-06	1.17764866509967e-06	5.19957450166265	123.382474841064	0.668307283524937	0.0218418341361257	0.000175380356570242	2.01543775854479	8
732	1	0.000101302121431019	0.000308679588365041	-1050.65208689006	6.20337962187774e-06	2.22009089194294e-06	8.90758545207643	108.168743486713	1.04663523076042	0.0186140929280896	0.000163981664565605	2.0000081150771	8
733	1	-0.00020695868272496	0.000285795971590947	-872.169554586818	7.92126082485232e-06	2.54538295970531e-06	10.8317451505059	54.0898851193651	1.06958439583851	0.0202174734936875	0.000291223617871409	2.04837919226608	8
734	1	0.000184002373627209	0.000268568716367527	-943.166626064382	5.23060257816612e-06	1.41075987489556e-06	6.33246395911758	124.415906230741	0.772275165983644	0.0186529242907909	0.000182037163211266	1.25150821929284	8
735	1	0.000257458599738925	0.00035413132425932	-1251.99043117079	6.91701969947928e-06	2.51343190502233e-06	10.4661111272777	126.017694412572	0.757262673721367	0.0250857321046567	0.000260535444529514	1.22422228264798	8
736	1	-0.000589838981069803	0.00019782494268633	-456.570604936398	8.73151968253788e-06	2.64811009376026e-06	11.556910011228	18.5408371038356	0.344741995881387	0.0356453724173491	0.000476760572459614	2.30106421217674	8
737	1	9.96298076965369e-05	0.000262050061644143	-894.209030538932	7.11896521715379e-06	2.59126524199589e-06	10.5700706012832	110.816493024455	1.37290609052129	0.0160628929405675	0.000200675050838973	2.08134687602161	8
738	1	-0.0001600072220272	0.000273777043256533	-847.345592388738	4.77883854213978e-06	1.41776584060722e-06	5.90805697318715	59.6961257009624	0.756598356061902	0.0181688317136377	0.000154940541179976	2.29916798064405	8
739	1	0.000410303843163944	0.000336945029591122	-1244.57042082862	7.67407370563671e-06	2.12651873534749e-06	9.36640135418722	140.606866986483	0.55469886652877	0.0304197502919408	0.000348485116580071	1.6183446866985	8
740	1	0.000111729167755731	0.000321497983906407	-1098.0503161196	9.28227797471155e-06	2.32457355714194e-06	10.6585998729946	109.163709774816	1.48155965732759	0.0195011428714338	0.000215191467030328	1.78999319415383	8
741	1	0.000223673697493931	0.000344310466642272	-1209.56615019017	4.11680645097361e-06	2.43639044177703e-06	8.84649102220764	123.008878894812	0.516134793992589	0.0235247568830914	0.000173825340201665	2.14665733089157	8
742	1	7.06213342109302e-05	0.000292230420646928	-983.488705982817	4.10349670633514e-06	8.97614492371088e-07	4.06034529259129	103.585802731175	0.761214361619366	0.0172255533709631	7.44930756515299e-05	1.13332014440865	8
743	1	-0.00047618058820441	0.000208344458672603	-528.125588473837	2.83985823891303e-05	5.04645268201319e-06	25.2328448082939	23.6309381878286	1.35438374786571	0.0297803222262303	0.00149517758511728	1.7558253045267	8
744	1	-0.00026138006831812	0.000165064725262371	-451.004663664136	5.59183594386883e-06	2.01578117466246e-06	8.47228659476322	32.2729140438579	0.637199070833711	0.0177122651063826	0.000277824021658342	1.47695782488085	8
745	1	-0.000446021065004561	0.000205488028605281	-527.495616666226	7.29121091751769e-06	2.35047732020655e-06	10.0008863154253	24.7361729193242	0.434449851333426	0.0281368414478038	0.000383585941393032	2.54062260311074	8
746	1	-0.000481436468117969	0.000293244518737203	-811.371245856349	5.09913142142786e-06	3.10097366273775e-06	11.594108612726	31.345729999943	0.380979774077711	0.0322984269444646	0.000266084283546295	2.12032076677132	8
747	1	-1.23746873391391e-05	0.000299746887635892	-981.604251143767	2.73537358898033e-06	1.28200375983209e-06	4.99353283899486	87.6359555575273	0.522067090999643	0.0171888602821468	7.36750579490456e-05	1.26854646890535	8
748	1	-0.000343900538217995	0.000132636932910551	-315.939553920117	4.30936457386417e-06	1.18056685255214e-06	5.18019803869571	21.0908286451822	0.295671503884031	0.0211187707296006	0.000231650601681505	1.56463013474495	8
749	1	-0.000184016676514855	0.000218975740919108	-654.880726400531	6.15351287480511e-06	2.47765821399288e-06	9.81617660333974	49.9579220155463	0.996230114476201	0.0163882463985772	0.000251518289930229	2.59834843568161	8
750	1	-4.66384693627873e-05	0.00023740382504973	-763.583242784746	7.13276767047357e-06	2.24229152481359e-06	9.60937069732376	78.8856639314188	1.6606345189251	0.0138622305256035	0.000148655432706651	1.66856982617702	8
751	1	0.00012635540841575	0.000288964784935827	-993.037177612325	5.35732732483961e-06	1.62542842084699e-06	7.00609502285065	113.618278758756	0.899556351729547	0.0180701051186816	0.00014968161863134	1.75245064828805	8
752	1	0.000234289039825846	0.0003524132520956	-1239.83509189188	4.66602408591514e-06	1.4436655469731e-06	5.58137228724159	123.616490975633	0.537102861627201	0.0242467746062403	0.000163253452936039	1.54709808836571	8
753	1	-0.000122740860815195	0.000343403889395224	-1093.01281057753	2.76680244813863e-06	8.41398790386108e-07	3.52156849931819	70.3318809049544	0.411748849853314	0.0208946276983681	7.00541885061731e-05	1.66080180479749	8
754	1	0.000209781087321721	0.000267900023489079	-950.899891227891	1.25266352331369e-05	2.15074492829641e-06	10.5885366757467	128.062981644955	1.6756829058219	0.0194956009001146	0.000453007689119038	1.28250557304394	8
755	1	0.000521379485932822	0.000266763268546918	-1051.86002391307	1.21060105122594e-05	1.39888902583178e-06	7.73710290999599	152.90349178971	0.553043334833622	0.0335559193843551	0.000618569672644637	1.75626507104563	8
756	1	4.77345139340888e-05	0.000208778495094617	-699.089448727629	7.02662764883563e-06	2.32742050016843e-06	9.86229792463787	102.878578497566	1.83779223558255	0.012270803501707	0.000157959411136452	1.95006651683785	8
757	1	9.21212815176205e-05	0.000356198800943519	-1206.66502666094	5.15184748904836e-06	1.56378197092892e-06	6.6478174928226	104.500302754773	0.779128785932368	0.0210801680212569	0.000113960483140554	1.64876433538174	8
758	1	0.000356531189468675	0.000371920746402937	-1344.40882969932	1.46011738237136e-05	3.48913994880696e-06	15.1411022254734	133.789727270251	1.20254455861508	0.0295192551110972	0.0005966446816742	2.85443431862896	8
759	1	0.000157078019000606	0.000299533102469137	-1036.72868839197	8.88609138987845e-06	3.84011037680681e-06	15.4905256582312	117.672945729507	1.36694755856093	0.0193786468705355	0.000306396917530782	1.64045403126275	8
760	1	0.000144476125193986	0.00031814364341166	-1095.16881521743	2.61563502770857e-06	1.07889825591755e-06	4.18213606650238	114.423858460179	0.397315938415086	0.020019830685726	8.37126437035434e-05	1.31665964007174	8
761	1	-0.00015844734083667	0.000174419536786002	-517.301179037332	4.64433467196322e-06	1.410181690157e-06	5.87468622534134	47.7471583890519	0.867069733431344	0.0135013626500324	0.000188657218701673	1.50192022423258	8
762	1	0.000510300083207455	0.000386625366605431	-1444.86165115979	7.99004882846834e-06	2.02746050169457e-06	9.28351552034281	142.8508597871	0.455392206337319	0.0366820645427026	0.000371575774495146	1.77024769736801	8
763	1	-0.000214702844623422	0.000254862481700953	-769.017467741236	3.07332646922321e-06	9.57500728835203e-07	4.08828767118558	49.8883336824632	0.417806868272595	0.0190935284336433	0.000120960111454087	1.22971461055568	8
764	1	0.000427430689103063	0.000333036611349162	-1237.85210703255	6.531840283359e-06	1.77355925976807e-06	7.95613995877241	142.075728223599	0.449538725948893	0.031046188595127	0.000301749084037164	1.40340597501859	8
765	1	0.000106221162195946	0.000262920414164282	-898.278000045335	4.47599785395428e-06	1.75385276271957e-06	7.03914154381783	111.998954554945	0.848986821245266	0.0162471752787212	0.000133826797882558	1.23424144394501	8
766	1	-4.54187831965267e-05	0.000170254987500912	-539.841022352897	4.10810979971672e-06	1.23036114431625e-06	5.23892706207555	75.0630993937707	1.29476177541067	0.0100960343502265	9.12147376068173e-05	1.6619330073953	8
767	1	-0.000641469514537998	0.00014156091016546	-250.10216996951	7.83036139526542e-06	2.36451494951489e-06	10.1971968352227	12.4446964344546	0.249437938103278	0.0376378110570386	0.000439076955889179	2.29748210110331	8
768	1	0.000512595612681432	0.000371410834378225	-1395.08355825387	1.42497021953693e-05	3.5843687830108e-06	13.6283302578628	144.074082024995	0.801074500446434	0.0362687336306351	0.000672030974352025	2.13513760736369	8
769	1	-1.66536301302773e-06	0.000162848815428657	-529.273348896946	8.32044521056708e-06	1.99412271607955e-06	8.92524811425812	89.4140887934592	2.92711969596242	0.00933103760948484	0.000114352797805385	1.89751965373391	8
770	1	0.00018885582987744	0.000333660233951985	-1160.22251791876	6.85671165246585e-06	2.30555348021362e-06	9.84920209245913	119.510399161651	0.907746910080875	0.0219672094619341	0.000225087504249504	1.21561398415061	8
771	1	0.000198681216478677	0.000491031983110655	-1695.54428515081	2.95189359038165e-06	2.18425103613766e-06	7.80123945872453	112.029226093312	0.308963717747034	0.0303498173298635	0.000132223343009494	1.66369385374596	8
772	1	0.000124112665959926	0.000408597363914091	-1394.61151470538	4.74996299343858e-06	2.61454809037e-06	9.9585334754892	106.896314924794	0.618266776450814	0.0244670916343921	0.000163712495892787	2.28976168512983	8
773	1	0.000132262766549896	0.000296830748591899	-1021.07647262756	6.5601402573784e-06	1.57607859773945e-06	7.16767921436641	114.016945068204	1.06254454777715	0.0186190942521023	0.00017380132373124	1.29829047943903	8
774	1	3.95942744191285e-05	0.000303350777367967	-1012.04365130243	6.43442840785043e-06	1.36263533515841e-06	5.78295706123057	97.4363817268323	1.19541003279025	0.0175281447778559	9.09396195460815e-05	2.59096384708706	8
775	1	-0.000437545717386979	0.000190602625902001	-480.2964133022	1.16155987333597e-05	3.82801402406705e-06	16.3219608853099	23.5387900747084	0.698327116581159	0.0273448921050203	0.00061640170816359	3.10145475819313	8
776	1	0.0001295318157181	0.000370348291561796	-1265.77563063913	3.03267211705694e-06	7.03962962006001e-07	3.08312535384712	109.277629188384	0.419414918957633	0.0224798391893444	6.88503289371433e-05	1.33531519955439	8
777	1	6.22291459171206e-05	0.000361749076021952	-1214.84287014503	3.33834061732772e-06	9.35571341753139e-07	3.97787620927933	99.7606588329229	0.514144069399379	0.0210311296998782	6.19866501442557e-05	1.76998237843195	8
778	1	0.000102429764522891	0.000363766964866079	-1235.94842158341	4.07899084098918e-06	1.61036310335159e-06	6.56278330098066	105.726196257661	0.598938093180516	0.0216528208516422	0.000109088642852703	1.32080070384164	8
779	1	-2.13077163216737e-05	0.000303527675852994	-990.614645139977	8.26012808886617e-06	2.72736030357495e-06	11.5496806800124	85.9844101365533	1.55200377473774	0.017433653296365	0.000159366820810456	2.3237659981646	8
780	1	-2.82513889117362e-05	0.00027427963877832	-890.607609874817	8.34160841781667e-06	2.66083845936815e-06	11.490732860578	84.1191512619908	1.72516166698094	0.0157982093980422	0.000159362768398856	1.77554455806875	8
781	1	-0.000207926955156101	0.000154239189622332	-432.37685195585	6.59191620458085e-06	1.92672960588938e-06	8.48554206864235	36.5678416835829	0.93420499018338	0.0148332281321473	0.000310389729651703	1.58767855172485	8
782	1	0.000318089931206991	0.000429045476638566	-1521.75663993618	9.81937748461294e-06	3.05093081010003e-06	13.2212875494886	126.552859821971	0.868348990875464	0.030601587927066	0.000363304445498436	2.21196957521202	8
783	1	-7.50152277516269e-05	0.000270171842926019	-863.564551137376	1.83694651083513e-05	4.18108312062765e-06	19.8119932312981	74.4822890685497	3.62402458443314	0.0160653222958729	0.000364098739718824	1.44493299106568	8
784	1	0.000151588027572155	0.000278821027414273	-967.345392054182	7.06338084589863e-06	2.93245885224715e-06	11.344758418721	118.531820777825	1.14851065183527	0.0181836340134112	0.000243220020178319	1.62667612858563	8
785	1	0.000501306840633108	0.000232061561790062	-926.225145071558	1.54211807895312e-05	2.77454531262263e-06	10.4734667761745	155.159958143812	0.720880437824384	0.0316509817962753	0.000804600370055814	2.21994804425378	8
786	1	-0.000230949985254026	0.000271315614153686	-819.197587399323	3.22752197692081e-06	1.24710455875767e-06	4.94180585024253	49.5948200873084	0.4160439418848	0.0204145149747603	0.000131636596814431	1.14325290607787	8
787	1	0.000217570847818675	0.000384914385183727	-1343.10032622511	6.59997425713855e-06	1.86063460584883e-06	8.23031688287905	119.477078392508	0.753938505817628	0.0253332971471139	0.000207938199535237	1.5497299113012	8
788	1	-0.000264863049502583	0.000150893642018449	-402.467629593702	5.80021455579946e-06	1.91620282752042e-06	8.06592991637932	29.6703547867734	0.623835802374082	0.017465471676644	0.000293825428005863	1.87640689692376	8
789	1	0.000539705412012811	0.00033548259409474	-1284.26518646567	9.05981252021153e-06	2.44189182504431e-06	10.8620937676821	148.134784923111	0.470027556887472	0.0364101219710165	0.000447002758099565	1.33691521595059	8
790	1	0.000186911343461521	0.000206166360743596	-734.9309826058	6.99121236870205e-06	2.89485943211854e-06	10.8988428746371	132.195592476328	1.13907846733071	0.0159443370741599	0.000295779586993516	1.58600603822407	8
791	1	-0.000497589192223142	0.000157265386326941	-347.762924838039	8.74868550427867e-06	3.66773491796564e-06	14.9431925927485	17.539383931197	0.480862981017043	0.0298997989105771	0.000482136289919001	2.30076146203863	8
792	1	-0.000308732910219804	0.000167005116818788	-442.710614972181	4.83525429118672e-06	1.60710422053387e-06	6.67627412499668	28.4106046042691	0.440746077263464	0.0201112845414571	0.000247580207888231	1.48222774809384	8
793	1	4.96237116178796e-05	0.000188007444261041	-630.314521722191	1.25346789245067e-05	2.19178731812172e-06	10.2040271774563	104.785756340318	3.57498456604054	0.0111409446045627	0.000219855530786187	2.05492503301684	8
794	1	-1.5460097678588e-05	0.000312864339240126	-1027.56668702248	5.8796028897727e-06	1.56400727783818e-06	7.01418085064338	87.1710472982502	1.07421918662708	0.0179476779905485	9.1033005897222e-05	1.80390464695611	8
795	1	0.000131570175566552	0.000311717122197487	-1069.82033998351	1.17336503447684e-05	2.62846921157561e-06	12.4494544728088	112.883731045985	1.83876405487562	0.0193858190597496	0.000295964985368696	1.35646210120415	8
796	1	0.0002880948497488	0.000340916595123805	-1218.48813987943	8.64360520327984e-06	2.93365449847661e-06	12.3544517540433	130.199802945584	0.881643616976667	0.0255736129447541	0.00034447444714452	1.81283042561545	8
797	1	-1.27682762613684e-05	0.00032864391349051	-1081.89897644461	5.89495399797849e-06	1.9290288264039e-06	8.10276998701437	87.7750977262486	1.02626025796522	0.0188441143943407	0.000111217549557653	1.94065783619877	8
798	1	-0.00023815815092264	0.000230363250003035	-674.696258428445	5.30024407097664e-06	1.83564423760192e-06	7.77795998874478	44.0468445559546	0.676824047833829	0.0189844119572911	0.000230199964063311	1.54389944726381	8
799	1	3.20802447502636e-06	0.000257800657562591	-847.133153660416	8.13635260536447e-06	2.78984760273542e-06	11.8839465944469	90.7129414572929	1.80802770743562	0.0147720329210301	0.00015993932857825	1.39540445071091	8
800	1	0.000108647676081583	0.000277901319561011	-948.621002069991	7.0551650115835e-06	2.16786468850781e-06	9.45315174613982	111.353398873936	1.27080382030226	0.0170961865061088	0.000187208259555661	1.50909055496516	8
801	1	5.88138193636434e-05	0.000356666592602868	-1197.84245699939	6.08405356701143e-06	2.17890391594047e-06	8.52284139932034	99.3637288128529	0.953142407791258	0.0207114623804614	0.000135608509079621	1.5752318185577	8
802	1	-1.32546991719983e-05	0.000290048685300475	-951.403314688791	8.82146206697589e-06	2.33305852656602e-06	10.5433339455881	87.3835070801273	1.73907381860802	0.0166359084865917	0.000135513769168942	2.37998543773339	8
803	1	5.31457435980405e-05	0.000244605935900121	-819.832983105319	1.15363659683247e-05	2.67768795834154e-06	11.8431501816264	102.258184370547	2.5837104139094	0.0143418708133254	0.000205357286190671	1.96335970766632	8
804	1	0.000321993064258323	0.00031812460669056	-1154.05117028218	8.06308365067517e-06	2.59431508327626e-06	10.5566776316314	135.346254452338	0.754404770579214	0.0259343490358788	0.000344842970932745	1.30271176629807	8
805	1	-6.13330925565635e-05	0.000271965731207898	-876.572504950782	2.96770822869962e-06	8.29228476473445e-07	3.62143940817532	77.2913856196186	0.596136938726115	0.0159738231933488	5.95596828037245e-05	1.17080231131985	8
806	1	-0.000441528011820264	0.000175414428690289	-426.605748543552	7.88496340400213e-06	3.19095370289068e-06	13.0020440217674	21.667403381145	0.501166240902826	0.0272210537775948	0.000425245782629641	2.73312625683977	8
807	1	2.45032855131857e-05	0.0003210068262087	-1067.56153235572	8.68804520411917e-06	2.32254330354722e-06	10.3423858243305	94.3650709888819	1.542047285608	0.0184458408600108	0.000137989119329501	1.34809230116333	8
808	1	0.000433941416781025	0.000387286795195819	-1421.45605740073	1.6792754272432e-05	5.07502352943455e-06	21.9124046537129	138.251523310401	1.16292633771735	0.0333250763369506	0.000743491992809626	2.41419541082376	8
809	1	-0.000148234478906233	0.000219753798142823	-672.741145323765	7.8492826132001e-06	1.76274934884554e-06	8.01641288171041	55.9984462956373	1.42257623582696	0.0151877256357409	0.000265068049831772	2.39890036420268	8
810	1	0.000163691938044334	0.000344221893168191	-1188.09506117868	1.15301870119615e-05	3.4861239672389e-06	15.2163241333624	115.433046316486	1.58133388332083	0.0218389196367355	0.000336200051465069	2.44454746585375	8
811	1	-0.000678013375122095	4.89645966810719e-05	74.5682649936138	8.94089027253755e-06	4.01852037432466e-06	16.2002180715448	4.13060100893532	0.34215784245956	0.0389484692679787	0.000511213467539712	2.45286858307929	8
812	1	-7.82085269459943e-05	0.000167755044610838	-520.865569726013	4.29061033941641e-06	1.30436136622896e-06	5.40548935949643	65.004751182867	1.21582124420956	0.0106048788491648	0.000124008578017737	1.42836342540831	8
813	1	-0.000294558647939708	0.000145773496660344	-375.479735966951	4.1172907789653e-06	1.2538223850536e-06	5.40232208511825	26.3302487618138	0.373814805938194	0.0188305960785726	0.000213816495594518	1.50274365347983	8
814	1	-0.000391691036825008	0.000113878049371031	-237.633001732868	6.17580807759308e-06	1.80314467416602e-06	7.84222240748356	16.2109639260349	0.343214922665294	0.0233714857395739	0.000341000741841266	1.9094307554196	8
815	1	-0.000400611842605988	0.000242521775235444	-667.197203344367	5.14368365190621e-06	2.37753184626215e-06	9.28748336813419	31.1898089170446	0.410046295168568	0.0268317198653563	0.000261796797901901	2.41086490709557	8
816	1	-0.000173384598440671	0.000292377994274638	-905.482288964748	1.21171695232753e-05	4.00992444023298e-06	17.0515681598018	59.3314142917531	1.79025655581763	0.0194761073715313	0.000405531572048729	2.84713124450203	8
817	1	-0.000284641375084612	0.000134706356557382	-341.927318763889	6.39021817454707e-06	1.65040572346157e-06	7.40468245496695	25.3258246188431	0.566591995634517	0.0180428501921313	0.000333406308695872	1.89828022511771	8
818	1	-0.000259667777707373	0.000229991130714567	-667.038501705041	7.21003760239148e-06	2.55291740991637e-06	10.6854540641912	41.5317299937095	0.850385045004976	0.0198745560739439	0.00032409638084948	2.0004156901294	8
819	1	0.000806780222516146	0.000371502700940027	-1491.17475958311	1.74196766183894e-05	4.46312327167369e-06	19.5702426961611	155.275077515244	0.53785518381275	0.050890399376442	0.000912863688104974	2.24251606415084	8
820	1	-8.3259628005212e-05	0.000342187028059782	-1101.5819939749	2.82503764548828e-06	8.98091401887668e-07	3.7407672152098	76.3247493886361	0.447919117546098	0.0201778878987966	6.29618896364096e-05	1.78717040219282	8
821	1	7.64685039700796e-05	0.000279105561671557	-941.909897124954	8.77212931468931e-06	2.98952164738143e-06	12.7446772677781	105.321744332765	1.68232538292368	0.0165809018575942	0.000211963892597147	1.5186093811488	8
822	1	-0.000232360150474799	0.00022676659989947	-669.276870861379	6.29711568725579e-06	1.81368364243904e-06	7.78396469285645	44.3019988806616	0.809241140302986	0.0186025484404695	0.000268218384628987	2.421269445502	8
823	1	0.000222958654955617	0.000319046530062558	-1122.52806198658	9.73898337725285e-06	3.20731072010371e-06	13.5757247010749	124.946928604733	1.20581642830447	0.0223013276657014	0.000353348025659986	2.36438096664275	8
824	1	0.000123697848704021	0.000299533435087032	-1027.97896823233	4.28138120245317e-06	1.51280984212378e-06	6.28291517255962	112.439079390127	0.707048225773186	0.0185678489456222	0.000123229719239567	1.46604157630438	8
825	1	-0.000585754320531272	0.000235740003337325	-584.886630135499	6.77080315679208e-06	3.12467843889806e-06	12.1049290220471	21.9225872417493	0.34900908662556	0.0361772542424603	0.000366040787002757	1.73774180436374	8
826	1	6.10056414412193e-05	0.000391701423684426	-1315.44098216161	5.84893831753737e-06	1.16533719860042e-06	4.47006124044035	98.8524269180345	0.835689118831673	0.0227133996599207	8.37384703137725e-05	1.37120772717094	8
827	1	0.000293460898221178	0.00036064118718108	-1288.51062334674	1.00473686904746e-05	3.72783035257507e-06	14.5803484241999	129.135934090265	1.00316945929574	0.0266398471098341	0.000399329841430799	2.99092618745827	8
828	1	0.000454953820976611	0.000450512838011182	-1638.52927000829	1.05545902235286e-05	3.61106269429356e-06	15.292296194923	135.281012600534	0.703126223003035	0.0366847245116162	0.00045369405028872	2.25994614086713	8
829	1	0.000318420022833637	0.000350797279873415	-1263.56255935742	9.60292826005615e-06	2.39226451799784e-06	10.7193885673026	132.230145115852	0.881640698947613	0.0271445374899031	0.000383474101562753	1.90505145891892	8
830	1	0.00035865974808502	0.000318514269492921	-1166.85756279658	2.85003786394316e-06	8.3289244239606e-07	3.50415192401083	138.392743071296	0.237976675310779	0.0274833538616406	0.000126142981487723	1.47220827361562	8
831	1	-0.000171863996034742	0.000176530995006472	-519.742605734332	5.25681554729423e-06	1.47894717704706e-06	6.52546069380893	45.7674718585766	0.90820366461929	0.0141162223462459	0.000218700912151519	1.62479852986037	8
832	1	0.00052694284721308	0.000388798112423539	-1457.71396855735	8.54797851750842e-06	2.13244637902748e-06	9.82215095629949	143.57870819132	0.468734058642904	0.0375203201900547	0.000400719615912817	1.75614160658932	8
833	1	-0.000195731633059841	0.000294375477908006	-904.906302540399	4.25139249703008e-06	1.57977367332757e-06	6.19073251693432	56.3798808140012	0.591049898073788	0.0202545065214679	0.00015450291013485	2.78482620687121	8
834	1	6.37592381907474e-05	0.000298068097297734	-1000.39732579816	1.50859138078855e-05	5.25473105883012e-06	22.386265637388	102.07408026218	2.78067508563134	0.0174643913626653	0.000345498442489326	1.97489289725095	8
835	1	0.000393920966066425	0.000303253923915659	-1129.29477763077	1.29120274658918e-05	2.18719404179816e-06	10.3992070546716	142.409684655182	0.929508108382934	0.0284833582197166	0.000591179060643916	2.37518511814774	8
836	1	0.000279289149791718	0.000331140284393059	-1182.72944906836	1.03993436069896e-05	2.50058659473802e-06	11.6381315225274	130.144832910582	1.07282730067986	0.0248201384455626	0.000399457141274897	1.32986235330924	8
837	1	6.54380523795256e-05	0.000282038095648639	-949.466213825927	6.4971281289624e-06	1.96266943073279e-06	8.48017924569842	103.062556235415	1.25553487218214	0.0165888470949085	0.000138124809893581	1.58019412051064	8
838	1	0.00022164452899468	0.000314126091295231	-1108.3777011135	6.08677837487749e-06	1.83953589860746e-06	7.9919677822875	125.206448034062	0.757864517000218	0.0220273386825909	0.000218727804430238	1.3852570706348	8
839	1	-0.000160995338322162	0.000251624902929412	-771.589318406206	7.61976615201508e-06	2.77792974980748e-06	11.6289166881769	57.387962004915	1.26412323662605	0.0171154861057232	0.000270809870073309	2.17931286922944	8
840	1	0.000292770302535662	0.000307986006649063	-1111.31306349336	7.7137019029752e-06	2.67449502764162e-06	10.9909688238931	133.549146681596	0.79371502365853	0.0243469857408343	0.000324124223014788	2.08139813022662	8
841	1	-0.000309881421042824	0.000317708728014196	-948.743409509769	5.1455670814904e-06	2.22705575277766e-06	8.79707686523382	45.7145561539941	0.516186108699587	0.0254283101085093	0.000225209539239294	2.40856776656836	8
842	1	8.45568043805844e-05	0.000212998956973545	-726.604065959658	6.31072354785343e-06	1.94755998550578e-06	7.96216452550786	111.652198902735	1.47741584873044	0.0131304135177004	0.000168982888018139	1.66372424597483	8
843	1	4.38895445349255e-05	0.000318749908163068	-1066.79544974433	5.32679963631501e-06	1.9072075384307e-06	7.75725796031824	97.8399138536084	0.940825796456818	0.0184353378915318	0.000115982789967405	1.48342828004164	8
844	1	9.75988950811025e-05	0.000193107834852445	-664.35380893424	5.02542271553205e-06	1.32358279030824e-06	5.6895619771223	116.812552766568	1.19815542568986	0.0123971145577286	0.00014645718459744	1.57097172216737	8
845	1	0.000145423665669653	0.000381370922362214	-1307.36220058236	1.34104967058221e-05	5.79426923362471e-06	23.6616215779797	110.872758350223	1.78269553095292	0.023385650161714	0.000413727706267634	1.95016703602934	8
846	1	0.000291002584781982	0.000314024544095449	-1129.93000157473	5.4904705724218e-06	1.3640695108711e-06	6.17605291457497	132.820882772189	0.553048277300558	0.0245299483560473	0.000221374365330384	1.1994124986239	8
847	1	-0.000474835552825965	0.000180860850914635	-433.529410152483	5.7160133525539e-06	3.13078322189175e-06	12.1970531951303	20.8514144565761	0.401841780525498	0.0291127633660437	0.000312643376118008	2.05246455228327	8
848	1	0.000177289429285036	0.00030268436125495	-1053.93118810378	6.82587987658717e-06	2.24897333355433e-06	9.57597602513178	120.358520638832	0.97978774229159	0.0200984377826501	0.000226788909834723	1.84533056297016	8
849	1	0.000538186802414753	0.000292104412125416	-1137.44377368448	1.2389926397897e-05	3.11543229329999e-06	14.2505735397521	151.508813237354	0.609473471053384	0.0350849492021723	0.000629699357885755	1.77999942019092	8
850	1	-0.000235064524124847	0.000175255229610896	-493.486595587301	5.88196857363715e-06	1.76048638529353e-06	7.67415866609949	36.7068206095652	0.740314839180168	0.0167994626769996	0.000276829208822346	1.36358486508491	8
851	1	8.07039510990028e-05	0.000385867910583677	-1303.4710670548	4.25696947431214e-06	1.57805992663853e-06	6.15418278119128	101.813080895422	0.607424315328999	0.0225869785371344	0.000101615487334374	1.84357274676447	8
852	1	0.00031256140550044	0.000333438237683858	-1202.77944047119	1.13503372200871e-05	2.35509700554138e-06	11.3521244434928	133.149011028108	1.05760154514859	0.026185842496659	0.000455522269745352	1.79790877564896	8
853	1	-0.000545975128892525	0.000134282955153704	-255.588036919386	6.21101379692088e-06	2.10326234346002e-06	8.77471756736321	13.8176750112679	0.257234110913976	0.0322143290700581	0.00034676275675344	2.78644125790714	8
854	1	-0.000191178835572224	0.000249714818267856	-759.74671152998	1.1230273172582e-05	1.2810829394843e-06	6.41603107044465	52.5627407602516	1.63072560792166	0.0180192112253224	0.000395464793945477	1.64918448044087	8
855	1	-0.000561370293259438	0.000186644068277328	-427.761150496623	7.9715668582964e-06	2.23460023064495e-06	9.94023363547515	18.390904368401	0.318605610127554	0.0338953101882282	0.000435287965724243	2.37521163737227	8
856	1	-0.000218069939616647	0.000251644316922488	-756.726465824144	4.60794916576279e-06	1.74268989471465e-06	6.96010880653569	49.0884516366417	0.630551879200805	0.0190786645885055	0.000188650696447472	1.48373687940675	8
857	1	3.93998969204086e-05	0.000369000986374752	-1232.11622779376	5.33593029903836e-06	1.56147459035351e-06	6.80991005137084	96.0946371429912	0.819584734977764	0.0212623755628556	9.46970137332767e-05	1.49063369052015	8
858	1	-4.05353332964452e-05	0.000257607637677614	-832.371897389507	1.36410046478358e-05	4.2494765667903e-06	18.5295973514496	81.0576604215833	2.96421193983157	0.0149414392418237	0.000269458799953492	2.30774358587836	8
859	1	0.000166018299492974	0.000300044098417202	-1044.08256689203	5.31860473524568e-06	1.48349061481034e-06	6.48000559600714	118.956325557515	0.786777542630517	0.0196474009589451	0.000165220016931595	1.6649406927416	8
860	1	-0.000609087159336497	9.73616242221593e-05	-110.931569047946	6.96304047083196e-06	2.25188311162407e-06	9.6348206457335	9.08180899157165	0.230406137363808	0.035341156931338	0.000394477455047788	2.20382968578275	8
861	1	8.91271408289492e-05	0.000323212940805358	-1093.97143105621	5.51120558815109e-06	1.04370660681982e-06	4.48463705403907	105.416387300431	0.909166543359058	0.0192099209427852	0.000101830690834385	1.21929285736641	8
862	1	-6.3364057210777e-05	0.000275620794647109	-887.679400028199	5.6507109510877e-06	2.67779788008531e-06	10.6156095785978	77.0529070382142	1.12229885262912	0.0162038524313743	0.000166192556781384	1.70315718801593	8
863	1	-0.000342455657927364	0.000182180858791438	-480.821229388451	7.17103022910231e-06	2.52512975232511e-06	10.6570404728281	28.0122535284827	0.596580502287639	0.0222249824874439	0.000369044728531258	2.11913560540698	8
864	1	0.000420940783851435	0.000330554528142615	-1227.23043449846	1.59042128864798e-05	4.20357039292346e-06	18.9993058703468	141.858317379673	1.10948331679173	0.0306656831342025	0.000731954447014923	2.35601571808152	8
865	1	0.00018980282735268	0.00026692029272231	-940.484358834803	1.40808840155388e-05	2.66668058240482e-06	13.0911280438223	125.416034710176	2.02559357125324	0.0187657059412061	0.000483831086992533	1.44453207522932	8
866	1	0.000812511713804509	0.00044984135019807	-1752.4979101731	1.31572185188268e-05	3.02652803705894e-06	14.1186921603194	151.029204502487	0.425745478195841	0.0532120815530561	0.000664847230924116	1.68013056589752	8
867	1	-1.51567209537783e-06	0.000329190607417629	-1086.27140999856	5.77603701166659e-06	2.05283387340506e-06	8.1248868747156	89.7361984255026	1.00530198368523	0.018861431713276	0.000117627326855137	1.39034594239903	8
868	1	-0.000210497226506694	0.000222554990719537	-661.813504609631	5.93776821658337e-06	1.76176320462916e-06	7.37981924445791	46.5949128561766	0.838025242864886	0.0175515780915703	0.000245008136309011	1.95196644162131	8
869	1	-8.79658889699943e-05	0.000271841531511075	-866.924172965564	5.6029862107585e-06	1.5473563290137e-06	6.91111386166361	72.0688065511796	1.07325901112342	0.016370539387367	0.000129937009025855	1.47839788218326	8
870	1	-7.33811470279132e-05	0.000200958047807065	-634.233172636348	2.14072412554718e-05	2.36417141345131e-06	13.2961307438742	69.9400031972515	5.3897775008068	0.0122576722089605	0.000439529796074876	2.29153968856091	8
871	1	-0.000183613252592468	0.00016332055449488	-471.415740624053	8.79867712387472e-06	2.96621699738095e-06	12.6394938432879	41.6524948093982	1.45807668041201	0.014079780893411	0.000393248950015947	1.91147916352646	8
872	1	6.84426623723045e-05	0.000336419841455271	-1133.39324389374	4.62096859737938e-06	1.27187185738306e-06	5.60130232465376	101.499553868892	0.756903727662086	0.0196702927257491	8.88000168882469e-05	1.31707760497829	8
873	1	-4.61547036488838e-05	0.000282954738177627	-914.616973989205	4.34706350436404e-06	1.71562321103108e-06	6.82458338919435	80.7356799213745	0.859202302240829	0.0164263748579572	0.000104975506577965	2.74075257120738	8
874	1	-0.000433972754365113	0.000181189426749783	-449.370502464497	7.93811324847715e-06	2.81988176953344e-06	11.7229716240878	22.6611885904076	0.489237829741992	0.0269449768709933	0.000424298929332278	2.62256505010964	8
875	1	7.21220594078328e-05	0.000305901034504282	-1032.83661383673	4.76205471747259e-06	1.76188451364802e-06	7.16578811640596	103.266312506049	0.848180032032329	0.0180073833231518	0.000116508473279881	1.44550522063345	8
876	1	3.82075330746322e-05	0.000207519415650266	-691.253641320736	8.83571254460506e-06	2.8637028887243e-06	12.2282577291253	100.432207237187	2.36373846740325	0.0120898333950379	0.000185585211590084	1.8847274168548	8
877	1	-0.000232661151780289	0.00018214363645506	-517.733434039423	1.45868250977484e-05	1.99871597730617e-06	10.1227836147307	38.056356848645	1.77010065356518	0.0169296677878776	0.000661859591316425	1.72587446152789	8
878	1	1.66565534776463e-05	0.000342936437005838	-1136.88631022056	6.09685403605211e-06	9.81468620587469e-07	4.37156550761032	92.7806925995828	1.0162597935171	0.019671972650201	5.86686912510324e-05	1.4503500437523	8
879	1	-0.000427478624133122	0.00017759178374728	-439.009632760003	9.46441201413538e-06	2.75790985352936e-06	11.7637841589475	22.5599602535923	0.54896777817315	0.0265222395603644	0.000504431520822632	1.88273470234812	8
880	1	0.000144320582915396	0.000281079543108416	-971.689029509279	5.89237104343148e-06	1.58126763525809e-06	7.07607188685667	117.178278342812	0.959504331577263	0.0181034838734888	0.000173998119624401	1.20657358026143	8
881	1	-0.000134514847691695	0.000262519153902233	-821.26638966737	3.19399082175575e-06	1.18518511493951e-06	4.70031714540663	62.869392535325	0.562026711790767	0.0169008511903144	0.000103037213955857	1.30654017670438	8
882	1	0.0004765633890769	0.000326194045444504	-1231.99484801106	1.64748041631557e-05	4.15358177114604e-06	19.0299046419641	145.609472766401	0.983852442355645	0.0330887539067533	0.00079045598544413	1.89100105236684	8
883	1	-0.000241173614788768	0.000176491844542237	-496.794455587483	4.31446478086154e-06	1.45642085844751e-06	5.94387331367278	36.1968194361131	0.537954095448721	0.0171231079040695	0.000205485982767415	1.7035634494855	8
884	1	-8.60389862113857e-05	0.000330820174063883	-1063.25608126557	4.48349520466207e-06	1.04114460834308e-06	4.56561293587937	75.4216080133766	0.728639872854421	0.0195851595744614	8.66825272667185e-05	2.18279241368008	8
885	1	-0.000525199510679124	0.000215370090975391	-534.661894105511	4.32137582938837e-06	1.28878580238731e-06	5.55502003969947	22.2972052679749	0.204631493895787	0.0325235561113004	0.000230790107644293	1.92006873838405	8
886	1	0.000105323160568175	0.000330339181180171	-1125.44149060011	6.30596026977031e-06	2.10080825752247e-06	8.85461254286109	107.684018033181	0.998399778693085	0.0198657723448719	0.000158735788251501	1.42620614810384	8
887	1	0.000265603823536145	0.000409910676171546	-1442.21995241748	6.43428951480233e-06	1.79270157767384e-06	7.59553449192948	122.941436495123	0.643660699165346	0.0279854615175736	0.000218216439279108	1.44840048905381	8
888	1	-0.000288054321718202	0.000273955203894929	-808.622056556033	5.80885884924574e-06	1.83834752929191e-06	7.89247985149812	43.5629237504827	0.608088181317634	0.0227765482580082	0.00025185663171994	2.24957410319428	8
889	1	-0.000185774653132078	0.000215783460104588	-646.529889813487	1.22981246110403e-05	2.4878235674106e-06	11.7896653285396	49.2738220722088	1.90363090947152	0.0163141840668857	0.000472253125599583	2.90807790682665	8
890	1	-8.1032133352477e-05	0.000280191984297226	-892.709493341552	6.83118427379583e-06	2.27763430799064e-06	9.73795837885004	73.8700154425412	1.29505555092391	0.0167116919149066	0.000165949700584184	1.89437632435729	8
891	1	-0.000540801216594229	0.000112881107789967	-185.237036638795	1.24056130376101e-05	2.22044439906303e-06	10.930267267626	11.7900356178001	0.346302642160591	0.0316534182319685	0.000696278902735422	1.78779154133031	8
892	1	-0.000243643169488411	0.000229678924360722	-671.00453614488	7.69258839292801e-06	2.69538298648737e-06	11.402033080428	43.3101141766421	0.96328612062835	0.0191846252065204	0.000337756889689115	1.89983382954053	8
893	1	-0.000275960035078089	0.000157101068469254	-419.828041314153	3.98204984671904e-06	1.51530667181742e-06	6.14373421895236	29.6523921123055	0.427566915146767	0.018193975032176	0.000202875398517104	1.56321212665809	8
894	1	0.000213008357549007	0.000378349546171121	-1320.27823647369	4.54129079203246e-06	1.49151181363548e-06	5.38626864494426	119.379230867327	0.531050442562106	0.0248772518359033	0.00014778250176197	1.41400912471655	8
895	1	0.000300268569164251	0.00037239002743837	-1327.01555218461	1.21130903372034e-05	3.45969282707088e-06	15.2925311607443	128.880210584159	1.15897537520151	0.0274084415787001	0.000462160337270427	2.23226605113608	8
896	1	2.61577855637453e-06	0.000278362814075137	-916.663249832392	8.35504174878511e-06	3.13993751182689e-06	13.0515365569678	90.5383932501818	1.71958797102187	0.0159497181703614	0.000179953439992688	1.51501748406089	8
897	1	8.08226919099206e-05	0.000277915436298639	-941.779855140462	4.42705560132796e-06	1.50660381790823e-06	6.28438851004782	106.215358971002	0.845633225953046	0.016583074668489	0.000109030159629646	1.17581291821275	8
898	1	-0.000495100248457565	7.2160203640101e-05	-60.7818588334669	9.53716949127843e-06	4.25262720177024e-06	17.1721192095649	8.29239518040845	0.506991006018305	0.0286668660864677	0.000541867075176566	1.95201840057424	8
899	1	5.09967562272246e-06	0.000195492188133217	-641.997002517782	7.61017483296128e-06	1.96033305832343e-06	8.50995617249507	91.4942982723729	2.22895976013389	0.0112046876074885	0.000112854886380151	2.15995416517752	8
900	1	-0.000190625806679162	0.000235773094798416	-712.198529055191	8.43335759681734e-06	1.9410654867562e-06	8.91370804601047	51.0439817561439	1.26056764959695	0.0173717878767832	0.000315866795225439	2.32848496489851	8
901	1	-0.000407147895133229	0.000164644468924372	-403.658316892704	7.18370815213471e-06	2.02633804011271e-06	8.80156544095203	22.0176654342809	0.428379605022524	0.0251630373226703	0.000384052045475791	2.39416204398284	8
902	1	-0.000135125037861027	0.000268670200703209	-840.370742166117	8.50710838330379e-06	4.69977550882175e-06	18.2483247078886	63.3003396684458	1.50279638621171	0.0172309326404161	0.00032532278036815	2.101665890118	8
903	1	0.000264291089942954	0.000337541155268269	-1200.51173194414	5.31376784614332e-06	1.32527687948487e-06	5.92123542413937	128.060561552904	0.569733200809394	0.0245627073080641	0.000196987407670395	1.30937044987138	8
904	1	-7.81657386387218e-05	0.000259377611393703	-826.942196810392	4.51234280939242e-06	1.79737039248295e-06	7.37090486167237	73.2293546537394	0.92033694227888	0.0155214070361183	0.000123641773702709	1.25603520425962	8
905	1	0.000357965879101132	0.000315512534912267	-1156.01059910789	1.41266652335633e-05	4.28484636396293e-06	18.5992550497506	138.606920908725	1.18615814308785	0.0273396161731227	0.00062852794780072	1.89876555376138	8
906	1	0.000506018513645263	0.000428099587985855	-1580.75267618231	1.38108744923983e-05	4.51155937086893e-06	19.3933046826402	139.768255908174	0.826572760342866	0.0379765081702317	0.000626758099351957	2.25310333466918	8
907	1	-0.00028293860988447	0.000157088751510653	-417.44813032332	6.45051819988275e-06	2.25404754896816e-06	9.47883985092626	29.0392258053353	0.655010898031892	0.018542168248473	0.000329150662763634	1.61484847827225	8
908	1	-0.000324397490635625	0.00022032345483432	-617.877969604565	7.90274453386684e-06	2.03688699656062e-06	9.28632606589267	34.1834622061302	0.693886442849495	0.0224681394994661	0.000380266281932558	1.89955417460046	8
909	1	-0.000207706919758618	0.000236483631725807	-708.953761413091	8.19275019246936e-06	2.28191335456522e-06	9.55175573343365	48.7067048267288	1.15357898739676	0.0180337649959199	0.000324972771769275	2.50416328578881	8
910	1	4.53264580472214e-05	0.000314692532425363	-1050.62510104067	4.00794361538471e-06	1.0709588859927e-06	4.49081007678569	98.1961778422369	0.715420863578649	0.0182166226045979	6.89961462532102e-05	1.88758617491347	8
911	1	0.000401830600862987	0.000358894908331085	-1316.21122682193	9.07539247189621e-06	2.49158801115521e-06	10.478427182734	138.230372529659	0.67259474692779	0.0308692587286998	0.000399306413087256	1.86826656301692	8
912	1	0.000204560024269566	0.00034229519516162	-1197.98695396195	4.38821377305356e-06	1.32883944556369e-06	5.62548390259641	120.863083886187	0.55002464475127	0.0228473548208399	0.000144591973786073	1.30770635033476	8
913	1	-3.8730386746007e-05	0.000327236567361932	-1069.42917346846	5.85351615730354e-06	1.8019101430978e-06	7.55839619068425	83.2501059040913	1.01140302412687	0.0188801379033521	0.000109843106357294	1.51259961097739	8
914	1	8.63251105261427e-05	0.000358647286498615	-1213.93632420741	7.82701699881935e-06	1.71992297197669e-06	7.22976406224441	103.5334549505	1.18358400747987	0.0211358444812788	0.000142100321374451	2.32689609665534	8
915	1	0.000140963243207769	0.000343118678140492	-1179.13477311246	6.00784636860612e-06	1.66860324990337e-06	7.34849368572863	112.334300082567	0.863918763323809	0.0212536491597177	0.000157895862037341	1.23853825844858	8
916	1	-0.000291818640724218	0.000299536417207292	-891.777814975324	8.33634018076351e-06	2.51452946671312e-06	11.0192817529923	45.7477249245103	0.852693690138481	0.0239603362284129	0.000348913827411343	1.80609822521515	8
917	1	7.91373365491321e-05	0.00031485089376869	-1064.14510619836	8.32020912215134e-06	2.71896335996255e-06	11.3599411035694	104.108945096055	1.42891644547507	0.0186007371324024	0.000190606545430003	2.1841665803336	8
918	1	-0.000124520825904073	0.000244749732003183	-761.737254121351	7.03091663799089e-06	2.60369557329791e-06	10.7674805040842	63.0344654999768	1.33049928415874	0.0157337031240274	0.000225936506487495	2.22697587684312	8
919	1	-4.188772911203e-05	0.00025277793695115	-818.467423484666	5.65183464181484e-06	1.40826210665609e-06	6.2291342371786	80.5910402652382	1.24789491982318	0.0146806126391539	9.55982661779462e-05	1.94852016873219	8
920	1	-0.000365024959942526	0.000146200902124762	-354.611447445746	9.8485366276692e-06	2.01849435606431e-06	9.56227905725325	21.8272386857044	0.599361497382039	0.0225295506982945	0.000525587782187427	1.91381280497064	8
921	1	0.000201308696626523	0.000381865332956323	-1328.15690895663	8.61674332162811e-06	2.74965482878724e-06	11.9016106753087	117.79694108402	1.02592342970862	0.0247333543965169	0.000269127510219965	1.52315627300657	8
922	1	0.000194934339614004	0.000258335350119228	-912.20998875278	5.45145211975761e-06	1.47370867988166e-06	6.61483985552201	127.037424851609	0.786272674533222	0.0185426477698627	0.000199846056533555	1.37694877857254	8
923	1	0.000243608138786236	0.000389148659840446	-1367.28690127278	3.09737708354473e-06	1.18338286776233e-06	4.46699294836796	122.046680153735	0.33688264141457	0.0263050393064077	0.00011031790716797	1.63253774664232	8
924	1	0.000139822073223758	0.000295505474588513	-1017.35787261813	3.68770520602784e-06	1.0741441603471e-06	4.41035021880591	115.321751427828	0.589738517427965	0.0187308736596776	0.00010611940212774	1.38956460167531	8
925	1	-0.000328162121781279	0.000102646465543638	-220.686038829371	8.08602408468083e-06	2.82896736840068e-06	11.9773384217108	17.3692619533596	0.603502080430038	0.0197006408367315	0.000444808771543111	1.69961869587026	8
926	1	0.000371801608260894	0.000394374792338862	-1425.19572522791	8.86879106169915e-06	1.96031149638084e-06	8.73615057275142	133.312432808368	0.696822504939782	0.0310545162557219	0.000358027052792378	1.73420576416693	8
927	1	0.000325605827107109	0.000292058232015253	-1067.84407978728	1.23936784004604e-05	1.4960551265033e-06	7.87819511756575	138.108888785944	1.09379494964253	0.0250610679329384	0.000531702673499496	2.6070832580691	8
928	1	0.000135817407333076	0.000259310490948365	-895.745506554384	5.19314961456919e-06	1.58008192356406e-06	6.86813811237341	117.643912517415	0.911796412799257	0.0167719430839099	0.000159657410077898	1.39827002748183	8
929	1	0.000225039683132491	0.000327503513385456	-1154.982748296	5.75368938795533e-06	1.37414511562499e-06	6.33694762065145	124.494385853723	0.6928986463554	0.0227675140841086	0.000197651526596087	1.63307655403278	8
930	1	0.00048077299374322	0.000422029353425101	-1553.384808613	1.03857878860413e-05	2.21468905568613e-06	10.3796832702939	138.72287981952	0.631487833182279	0.0366536885091477	0.000454972570643564	2.09263840831651	8
931	1	0.000328208954150589	0.000360389323423965	-1296.76044865921	1.18075516016207e-05	2.20490831547479e-06	8.50776428732171	132.324334259368	1.04086920573254	0.0279284775500912	0.000464998099544342	1.30069821585527	8
932	1	4.54358230525502e-06	0.000219031257544127	-719.188218576867	1.19518758822822e-05	2.93982578374222e-06	13.3449681694894	91.1883726626608	3.12515398521882	0.0125522662636399	0.000169001184070263	1.73396401729177	8
933	1	-0.000103805092641713	0.000234763170654729	-737.606976935422	7.6689595602043e-06	1.75841632892769e-06	7.87959427526428	66.1464517430105	1.57360299176555	0.014707196116035	0.000200163274345715	2.51889980368531	8
934	1	0.000646853128279761	0.000479090608221226	-1795.15587013229	1.32944146282181e-05	4.48360211972995e-06	19.1692695811187	143.474568256101	0.618850448932118	0.0461203088299271	0.000630914191324905	1.94047331155279	8
935	1	0.00012833339666532	0.000379511886492652	-1296.77839203241	5.33010859032011e-06	1.53590768471416e-06	6.31844696364102	108.683162842127	0.725545264649914	0.0229540018878538	0.000128529386798813	1.40491044618438	8
936	1	0.000218576937313405	0.000367500085698143	-1285.52261909195	4.28061788270852e-06	9.55777598258123e-07	4.25900300597123	120.742786704478	0.497313282944407	0.02449903270454	0.000133917316325897	1.77533024670802	8
937	1	-0.000213304976371281	0.000303183126279894	-929.109266744168	7.87086028105803e-06	3.14402670632919e-06	12.8737264691224	54.871635597673	1.03349841139018	0.0212395855116085	0.000298398460749993	2.49092295063919	8
938	1	0.000417788501777609	0.00044121233690515	-1595.88885397255	1.10393438765987e-05	3.68637608534175e-06	15.5948357076986	133.438005726878	0.792732618737381	0.0348146934706506	0.000461143093525214	2.13998808769404	8
939	1	-0.000243163860632182	0.000222885096500831	-651.517331923638	9.7175640896128e-06	2.56290725036909e-06	11.0912294789111	42.5085124759458	1.18680394731982	0.0188994817788739	0.000422264918866823	1.99533417827112	8
940	1	0.000165721983508677	0.000271907496920364	-948.399973656736	7.52362668439923e-06	2.25530751588253e-06	9.8116718194332	121.361441639823	1.17509724155805	0.0182446762724453	0.000250011531694769	2.0424068429316	8
941	1	-0.000235460370980179	0.00020040791859981	-578.181883611141	9.34134344204371e-06	2.73532391186976e-06	12.0188734493483	40.4021782006561	1.18647176507297	0.0177158803989244	0.000420044498663799	2.0910410982306	8
942	1	0.000350016643839253	0.000335297778377338	-1220.56495572777	3.88402991597564e-06	1.06711774276754e-06	4.35266333470798	136.230383028868	0.330408449816669	0.0277713898790637	0.000166173746905257	1.68495304684836	8
943	1	-0.00016964587204405	0.000244536665341634	-749.163731020946	5.92890253170895e-06	1.4884079928217e-06	6.60109906414558	55.2492484836205	0.95192783591788	0.017052392309779	0.000205920081183096	2.0803845261162	8
944	1	0.000472712797847594	0.000235156873785694	-927.954711641046	1.61520306634544e-05	1.68001903303561e-06	8.83413530015393	153.551378864887	0.797580332794968	0.0302506573798667	0.000829689063812361	2.05823962604741	8
945	1	-9.88405650149439e-05	0.000177191300256128	-545.922447706892	9.16722807517977e-06	1.62639033778296e-06	7.855252849077	60.8464184527347	2.27184408637527	0.0116250034946574	0.000268503316940086	1.80009416004456	8
946	1	-2.30698010940402e-05	0.000219910630181392	-713.635824535085	6.10582130593304e-06	1.72145076820912e-06	7.55420573869295	84.0112711496215	1.57418949948168	0.0126690931362816	0.00010466406418466	2.04747872006915	8
947	1	-0.000458615805043557	0.000152529094414691	-343.716924807924	7.8302660620337e-06	2.60030180915059e-06	11.1469530252149	18.396391602902	0.413978671548356	0.027691918898995	0.00042830232513621	1.76075302964139	8
948	1	-0.000397357466087703	0.000146716125248126	-345.324971470701	6.80430963654807e-06	1.85226166671192e-06	8.15781491685108	20.2656368651161	0.396075713969794	0.0242692475170827	0.00036756743012733	2.34258784931303	8
949	1	0.00014407548054461	0.000307046120396638	-1057.81253934599	5.49054424076341e-06	1.47801804689537e-06	6.40119646722712	115.137413475061	0.84634742408129	0.0194329053562114	0.000154061887758216	2.58126832696867	8
950	1	-0.000122200559659957	0.000196073572898525	-600.793410805015	7.4602308263689e-06	2.10915039669476e-06	9.38660219721241	58.0672590041096	1.59430836295457	0.0132374109987268	0.000248257058496287	1.73235846257712	8
951	1	0.000201176521680162	0.000259453186544787	-918.54641769848	1.45720810216194e-05	3.58892099330219e-06	16.5005543778327	127.789520058791	2.04602588135538	0.0188108196726944	0.000536794818959088	1.92981626664271	8
952	1	0.000403020116348053	0.000315805199102976	-1174.49985922998	6.25766932263336e-06	1.58631066683346e-06	7.01434804565445	141.917870754486	0.4539466320242	0.0293362275804157	0.000287729027983057	1.2391074386811	8
953	1	-0.00047765575169917	0.000184166384906574	-445.202515049081	7.0228304804533e-06	2.12262417732005e-06	9.16703425165755	21.0847937012438	0.359289800465114	0.0293314230135309	0.000377979528283233	3.1450671589742	8
954	1	-1.49146396475887e-05	0.000252860619540146	-826.084310868221	1.33055141016322e-05	4.63404372990499e-06	19.6862228914867	86.624397418637	3.00508246396057	0.0145130262306452	0.000268824655552535	1.87231112007085	8
955	1	-0.000145696431506207	0.000249318767076056	-768.996311403524	8.68001447433863e-06	2.75947790584587e-06	11.9100592867766	59.6989195204902	1.51239917042233	0.0165452209307091	0.000285651756821269	1.78266038839679	8
956	1	1.80176631643238e-05	0.000248307283855948	-819.875577960905	5.85001939799511e-06	1.98083399300218e-06	8.45199531115229	94.1502202863877	1.34320054694954	0.0142643640754159	0.000115765818495349	1.29075023912282	8
957	1	0.000123762786845147	0.00023362975815251	-807.029321689246	9.4158077061251e-06	2.95241704260285e-06	12.3217938403686	117.911912238528	1.82785074589383	0.0151482161710135	0.000293465071299921	1.87583816779765	8
958	1	0.0001569172993336	0.000241588505205304	-845.298936811906	9.37151836052297e-06	1.79208316220442e-06	8.67621648490535	123.004652098794	1.5751347453564	0.0165055646706946	0.000304891972017781	2.2241310862031	8
959	1	8.2894928960924e-05	0.000265657486227314	-900.89925909435	6.59724037708195e-06	1.78648068066109e-06	7.98468955074304	107.329846554258	1.30123535779878	0.0159448570067013	0.000149080154795278	1.96300570722384	8
960	1	0.000176766110211998	0.000258636303199076	-906.466279163141	7.75877030012444e-06	2.01175919718084e-06	9.17089232431374	124.350824353427	1.18981054755052	0.0179491307806074	0.000268282996763858	1.31209218613259	8
961	1	-0.000336510799918683	0.000223039747125617	-622.622816021202	2.93520889890912e-06	1.02340851565761e-06	4.10138770656228	33.53646330277	0.260041215165493	0.0231311960093308	0.000143874195709549	1.11164202870838	8
962	1	0.000174603620404872	0.00027452303536875	-959.37467600163	6.02096435388976e-06	3.01698531629086e-06	11.6718542257003	122.457396079957	0.939042717060707	0.0186408905427982	0.000235692644498126	1.53510233953173	8
963	1	-0.000241147820572803	9.12237579242376e-05	-210.966069248225	7.00906464311908e-06	3.15145983195584e-06	12.518105454614	20.7211185793319	0.856034860953426	0.0147723190219438	0.000381006977610949	1.94795043753236	8
964	1	0.000437992163175384	0.000362659182321123	-1342.64240586934	8.07241463851004e-06	2.33338224373438e-06	9.42924206354079	140.375113691766	0.549428918128578	0.032581039742638	0.000366307377941072	2.43832052616916	8
965	1	-0.000333049028272277	0.000189183272717395	-509.695930668463	6.93157493472883e-06	1.9624802439081e-06	8.10042114286088	29.5980610241574	0.572207059486842	0.0219460002275014	0.000349763745449116	1.74474835503665	8
966	1	-0.000147341636836542	0.0002180408353968	-667.427603942909	8.03538893299191e-06	2.48798989026232e-06	10.4720799531176	55.9510412171998	1.48095945805716	0.0150777586398192	0.000283546224306542	1.83071664587226	8
967	1	-0.000518630168254396	0.000174964109959226	-402.44749338708	8.99226771900645e-06	2.73790613903145e-06	11.6772364106523	18.6422417192193	0.405320064970026	0.0313607197602721	0.000490755444166827	2.93868072649155	8
968	1	-0.000223161167525512	0.000221216672905458	-651.346855819048	1.73743013723074e-05	3.9462880853977e-06	18.5938363953002	44.7492885247433	2.28810479245365	0.0180037996828446	0.000724678292042032	2.14249831707963	8
969	1	-0.000538007859476212	9.29881377876234e-05	-118.945804591384	5.40451300885873e-06	1.9343699682942e-06	8.02449977254821	9.80600228270384	0.222128914598444	0.0312826136774333	0.00030571493510902	1.90543590101593	8
970	1	0.000236925417632766	0.000283835612574328	-1011.38960909677	8.06998531197764e-06	1.59681485588072e-06	7.30356205658006	129.852684129783	0.973083276345449	0.02118366040159	0.00030450891066197	2.65903749315376	8
971	1	-0.000252027145642337	0.000283971083340627	-852.63340911722	8.75570939203512e-06	2.99078634702399e-06	12.5924789449082	48.4106278952825	1.03262778788015	0.021754087380998	0.00035681115153367	2.39692687591931	8
972	1	-0.000435179822652063	0.000201811623292267	-517.497417172571	5.49279337747584e-06	2.47648869577862e-06	9.89532110977492	24.8791854372155	0.384956513960424	0.0274846232295829	0.000291681268697993	2.25841450868714	8
973	1	-0.000380464451953094	0.000200440638875706	-531.452937148705	8.50269201056252e-06	2.83297090021819e-06	11.9919800583394	27.7816719222026	0.624766527317299	0.0246391589006691	0.000437602171505066	2.72289596446135	8
974	1	-0.000202717832086329	0.00021376832061957	-634.626615855885	1.6471114712035e-05	5.15264537754536e-06	22.4361240269409	46.5198532736016	2.42453147923965	0.0168795553562688	0.000683801586509908	1.95312366341215	8
975	1	0.000132218368035067	0.000336763366137264	-1153.70385637517	5.73301756976482e-06	8.13898889254596e-07	3.78586416727518	111.435719324814	0.846435116243882	0.0207289803698245	0.000127651387854578	1.37651724698126	8
976	1	-0.000586523953417822	0.000109654465885392	-159.667456794414	6.14980589478104e-06	2.2827794948342e-06	9.44090441963201	10.5895696912171	0.241252956038893	0.0341875982843476	0.000347189752670437	2.59848572881049	8
977	1	-0.000164019654234472	0.000280616212509211	-870.899725879956	7.89459718093014e-06	1.46871436220029e-06	6.97702977481687	59.6937935519402	1.20852895215967	0.0186231466524589	0.000239537008725149	1.91624768723622	8
978	1	-0.000616949378276061	0.000114434052994852	-165.78447900491	5.98222384434799e-06	2.40938092657343e-06	9.81378529329787	10.5080126343514	0.238153092286939	0.0359515189899753	0.000337946903016433	2.43922588820378	8
979	1	-0.000675172457681505	0.000141836085357338	-241.576854908184	1.03027480934996e-05	3.57778891436367e-06	15.019701468054	11.8638322660607	0.339848139919129	0.0395289048097993	0.000579229376419064	2.83074850160672	8
980	1	1.21913158898148e-05	0.000303755971171474	-1004.76060586837	6.09822026259697e-06	2.08411200673503e-06	8.38649173537162	92.2983457550669	1.14853107817762	0.0174179464138717	0.000120134706451335	2.44320001500191	8
981	1	-3.35348477287278e-05	0.000295160148209578	-960.615261129258	9.89795575908572e-06	3.15059820316264e-06	13.5387756076304	83.5180911543026	1.8981214919021	0.0170202312611138	0.00019044528959418	2.48788559221295	8
982	1	0.000446239126389344	0.000397407684065651	-1459.26352631496	1.14638135371235e-05	3.08872095481637e-06	13.908875402014	138.312662712571	0.76376872595043	0.0342369078940123	0.000504432357438738	2.28329104302391	8
983	1	-0.000170939038482871	0.000231195103919301	-700.239226203592	9.04206442105237e-06	2.75758286340922e-06	12.0310617336176	53.5218395908289	1.48519417764821	0.0164740388444784	0.000333174834275056	1.67611787552388	8
984	1	-8.9564996103747e-05	0.00027461699774299	-876.407068040626	3.7516226348265e-06	9.60349713499566e-07	4.29448326645272	71.9365154350109	0.709940610604406	0.016550089900278	8.47278978422299e-05	1.26263080341905	8
985	1	0.000298458997616601	0.000214740192131376	-801.952204897494	1.13841506095206e-05	1.59479503566547e-06	8.2172365195995	144.265118032059	1.05552427549658	0.021066709239733	0.00053214347032303	1.91917951403998	8
986	1	0.000180985663043399	0.000314255930105535	-1096.46697972123	5.67578686733538e-06	1.49367597369376e-06	6.65610854030961	119.938416824363	0.785952888606388	0.0207781221445202	0.000178437909901486	1.5549751667425	8
987	1	-0.000380797428657444	0.000183669661996417	-474.003078421677	8.75881358977121e-06	2.88859223443789e-06	12.3887779845521	25.7493636239391	0.624700434128148	0.0242233929097893	0.000457694350885859	2.19870366322184	8
988	1	-0.00017712812345075	0.000284152264443106	-876.557303183723	7.92540544776169e-06	2.47297715039404e-06	10.5549813088259	58.0623868703686	1.17243279409839	0.0191848373342225	0.000268626978436686	2.29952085536604	8
989	1	-0.00021408747996614	0.000250125253468471	-750.148230820864	3.71048940679538e-06	1.50848253940087e-06	5.96104891997134	49.4390838265844	0.519417722989992	0.0188638106454846	0.00015304307615522	2.40685893945112	8
990	1	-0.000135989068036254	0.000316529185024326	-999.967165833261	3.95576731762804e-06	1.19586739340026e-06	4.99008944159053	66.7503976163033	0.609548591920652	0.019738686446658	0.000109396131691873	2.66002435860474	8
991	1	0.000451388683232923	0.000438048502421483	-1597.14260781006	9.29956607448706e-06	2.2442715819456e-06	10.1987547892717	135.859283561702	0.607909847877058	0.0360389145777447	0.000392718922131246	1.43925507190356	8
992	1	-0.000351655241606904	0.000139214984857224	-335.112656752358	3.75917673937314e-06	1.41464965894523e-06	5.79899515651223	21.5978625783789	0.289217497186541	0.0216697915674615	0.000202472995942444	1.37143536418129	8
993	1	0.000420676243034613	0.000336799505224747	-1248.94235578415	9.1062108667684e-06	2.04663925580553e-06	9.66331706104854	141.318729295805	0.628497101943901	0.0308761183564741	0.000413835291189248	1.57857020107	8
994	1	-0.00014300580017696	0.000407684189078974	-1304.69239019079	7.16364235757572e-06	4.58016469993925e-06	17.4892669208492	70.6703576129002	0.918739376172944	0.0247539672629671	0.0002824514465157	2.48821334777446	8
995	1	-0.000329668234446939	0.000120173781831023	-279.239850275939	4.81076534515813e-06	1.6010034733913e-06	6.77422322994734	20.0282878173938	0.364288016990848	0.020104440975274	0.000260865683357286	1.52726373043777	8
996	1	-3.8815277449702e-05	0.000262576267083665	-851.17324059758	4.98358077929613e-06	1.50805869018665e-06	6.47020669080161	81.5911618619843	1.06525768029419	0.0152080007812003	9.51303605351634e-05	1.40232141480368	8
997	1	-3.27864821665868e-05	0.000366250969606507	-1200.51363874476	5.05091724895776e-06	1.53940606454465e-06	5.99914044183476	84.8845648846734	0.784168255110552	0.021068548168671	9.15612472874391e-05	2.45224157477512	8
998	1	-0.000421472058355192	0.000356657515651442	-1045.53550065077	4.66832453190901e-06	2.61721675098114e-06	9.64854643182769	40.2385219690927	0.375385748786982	0.031634494637899	0.000225992962600848	2.27044112846857	8
999	1	-0.000103679606446237	0.000244764951173545	-770.24219657793	5.86252841802783e-06	1.80296607944134e-06	7.66874442991255	67.0430453311561	1.17338734705171	0.0152302635176511	0.000161902658341931	1.38065491095354	8
1000	1	0.00018575340248328	0.000313591528605804	-1093.85366070454	8.57376458061221e-06	2.13250978306167e-06	9.70123069713074	120.64003632747	1.17214048706058	0.0208830314175259	0.000271532710007395	1.39396890383683	8
1001	1	0.000123651024223516	0.000316577518113506	-1085.74653729527	5.49257602389299e-06	1.5064286620815e-06	6.65068301724178	111.334964166913	0.867428209569379	0.0194730554589455	0.000139902398525853	1.41288189345192	8
1002	1	-0.000462740552332372	0.000103675634904478	-179.71640139798	1.16522162876938e-05	3.43716431048458e-06	15.2052872247123	12.6284013717487	0.508880241938749	0.0271703704370054	0.000652893073745713	2.14045362819397	8
1003	1	0.000330033387918563	0.000300630538217333	-1097.33733812617	4.88499391105227e-06	1.18918061271062e-06	5.44711671330044	137.669314213677	0.437009208718782	0.0255786181561177	0.000211940192434227	1.22975780800867	8
1004	1	1.45360034712008e-05	0.000252153656133652	-832.242199330498	7.15919643315982e-06	2.25350362205706e-06	9.69433589362522	93.2993013621735	1.62163184534466	0.0144713259572598	0.000131046134281528	2.22665943522503	8
1005	1	-0.000475882041553764	0.000124377887481539	-244.458160829139	7.8297226038321e-06	2.88954785926633e-06	11.8391025277161	14.6473331923632	0.399049409053127	0.0281819259843985	0.000436044763157121	2.56476620881026	8
1006	1	0.000124739893418139	0.000268336713906598	-925.972639785188	5.1853901885071e-06	1.14516546747909e-06	5.21085962443662	114.931987987955	0.915233920407072	0.0169545780461249	0.000138655259837403	1.49132137813248	8
1007	1	0.000466139239291885	0.000362038609375741	-1346.22884731032	1.62912914362226e-05	4.00401092452362e-06	18.2771229027313	142.164412668315	1.01749255936647	0.0338170186741991	0.000750503367562149	2.01715084394875	8
1008	1	-4.27836048158875e-05	0.000197574365440701	-633.325835199475	1.63615124607134e-05	1.7753137752848e-06	10.0790705972888	77.7815736170316	4.53350066796937	0.0115825463628596	0.000221913806469843	1.60255000708904	8
1009	1	0.00010874066071527	0.000344214208844145	-1172.67490418677	4.88957939306067e-06	1.07773876163083e-06	4.78868010306155	107.531840033055	0.741826438832854	0.0206827400871816	0.000102902996296511	2.09149356017291	8
1010	1	-0.000228356668191933	0.00020207345915354	-586.773605781441	4.73185636562951e-06	1.47678625529941e-06	6.17769159298081	41.5057059155177	0.62478422459459	0.0174710273266214	0.000210636182954024	1.81471489903341	8
1011	1	-3.23095740169261e-05	0.000270594266577734	-879.271299391248	1.62880448588857e-05	2.95040040756147e-06	14.4562482196681	83.1909893094999	3.40115622256289	0.0156140368103479	0.000201039590109756	2.93433964786749	8
1012	1	-0.00054770053136233	0.000178812147287721	-406.054348342634	8.03239655623547e-06	2.39410139185203e-06	10.5128530752101	18.0807187895118	0.335682589400169	0.0330110011481679	0.000439563037913958	2.30276746647013	8
1013	1	0.000526958040608137	0.000344250040149696	-1309.65617666967	8.26766396621327e-06	1.37762824277776e-06	6.94264691856527	146.844302282934	0.424775521057809	0.036064166638937	0.000398920095355105	2.63328626804456	8
1014	1	-0.000194060816691607	0.000293626466410105	-903.519600308728	3.73045575762719e-06	1.61494389881401e-06	6.25297940682115	56.5388650815568	0.526960304003832	0.020165842920477	0.000140880847219723	2.4344304212047	8
1015	1	-0.000348299829042562	0.000145797546853579	-357.901549968964	1.45537997310788e-05	6.19000750335785e-06	25.2519993287835	22.7140789933061	1.21569177690035	0.0216339700019148	0.000781294523923214	2.86427522557224	8
1016	1	0.00041513272292034	0.000274133666299269	-1038.68578209847	1.25331340564481e-05	2.39529902601608e-06	11.5962863634857	146.561148060324	0.828063861582149	0.028503392298262	0.000603985633452281	1.44330349265312	8
1017	1	0.000216131876247896	0.000298237615727301	-1053.71098948666	8.74399653496916e-06	1.9979890529326e-06	9.28892593729615	125.930727209917	1.11640470221223	0.0211031059860431	0.000308253846545931	1.53565102777022	8
1018	1	-0.000310415148281029	0.000186862800710329	-509.198647703787	9.15334375699922e-06	2.03177299592407e-06	8.97356386260973	31.0469762620486	0.79565544585469	0.020759365448157	0.000453311431393093	1.58157762840848	8
1019	1	3.99664351571742e-05	0.000224332752970765	-748.53244265338	8.18575632009159e-06	2.74196728727187e-06	11.6805213050411	100.101655033254	2.02997409103634	0.013055707809599	0.000175183168425276	1.83726649215511	8
1020	1	0.000151080064770607	0.00022265968747796	-779.665255247718	1.0450901006475e-05	3.18650246743353e-06	13.4464354018937	124.157855488043	1.88046367643946	0.0154169857431725	0.000368591501879901	2.21638915975546	8
1021	1	0.00032832737904068	0.000279044072041556	-1025.24573551024	1.09261623827192e-05	2.92449342571751e-06	13.1867027439008	139.638928453303	0.986436611485978	0.0246880618880141	0.000489202707573948	1.82396835993933	8
1022	1	0.000188991725911952	0.000371688524095843	-1290.19152915398	2.91011333342975e-06	9.37312193884002e-07	3.68331293050516	116.951880209863	0.361188438350196	0.0238910492163313	8.94584491529254e-05	1.21185391796333	8
1023	1	-0.000517286062855659	0.000135131844601122	-267.437047092002	8.1109517047403e-06	2.83332952503395e-06	11.8239637120412	14.6403329243346	0.366839889506555	0.0306329103909206	0.000451502537396581	2.52174362522003	8
1024	1	0.000430013097217196	0.000290248065630983	-1097.40046336931	6.3195854887833e-06	1.60294665203361e-06	7.14464226173493	145.981636320069	0.417120767922101	0.0297251451179363	0.000304484219228031	1.56871172912236	8
1025	1	1.26150190662582e-05	0.000368067221349161	-1219.99075659703	2.94933254361209e-06	1.15654461240472e-06	4.5431335425155	91.9629689700067	0.458615357189046	0.021101080074061	6.6478704338251e-05	1.29232310405994	8
1026	1	0.000439605973286539	0.000303671507208443	-1143.49663635096	1.26434843092831e-05	3.29912587388043e-06	14.61002270134	145.364015783145	0.823752718763091	0.0306127731668369	0.000605641519060359	2.29336927263483	8
1027	1	-0.00028997648978258	0.000262073952858126	-769.001170364203	3.44426347359555e-06	1.45433637310317e-06	5.69360518248114	42.1065355683203	0.373663705136275	0.0223944499924187	0.000156706368363885	1.60272585815792	8
1028	1	-4.07922293135537e-05	0.00025442557136531	-822.402598568329	9.64085237686062e-06	3.04755127971283e-06	13.1249007866342	80.891249413296	2.11939301658862	0.0147636865304435	0.000193318630324803	2.39304809637445	8
1029	1	0.000436996264218194	0.00033897259411272	-1261.50120829153	1.43737259215947e-05	3.22203455833149e-06	15.2067959743841	142.199709763628	0.950033987915647	0.0316876271654962	0.000660496298379806	2.0245268877067	8
1030	1	-1.5111281554642e-05	0.000299263996365348	-981.557410513886	6.22558031366521e-06	2.08475943910523e-06	8.70123826400643	87.1093150916711	1.18906105887571	0.0171684090460076	0.000120644535794457	1.81502888138505	8
1031	1	-0.000149984985296458	0.000318589423271449	-1004.33381810534	6.50910911336407e-06	2.49120910988905e-06	9.96931331551031	64.7899617391197	0.973665863996786	0.0201754952597639	0.000204721657297351	2.52250220875839	8
1032	1	0.000335073853486817	0.000389095363666018	-1392.60493223115	2.27498961043657e-05	8.73856653936953e-06	36.4654409258082	130.733756545403	2.02602868101924	0.0294206794229979	0.000931351515792473	2.30150848456318	8
1033	1	-0.00045020383768556	0.000154688697514656	-356.702258796254	1.9885098109263e-05	6.94995123687853e-06	29.3254132929802	18.9625686567574	1.10936574722835	0.0272749608766389	0.00108524332933627	3.31093885248472	8
1034	1	7.35647481473987e-05	0.000337208335341366	-1137.16993619026	9.65007713947245e-06	3.03337582382236e-06	12.9613102999863	102.306721595531	1.56884952116678	0.0197750325289689	0.000206694371647577	2.84560288944598	8
1035	1	0.000251489377485821	0.000322205777158114	-1144.48289678893	4.15746115739656e-06	1.61676697858098e-06	6.30002789248656	127.972896421735	0.480109445662318	0.0234187309146705	0.000163748795503805	2.21521420633127	8
1036	1	0.000576026582154676	0.000354950320940925	-1361.1679589726	7.37752124492116e-06	1.8149674033061e-06	7.56967682905617	148.358426818952	0.352893372456641	0.0387666908342226	0.000363976230869458	1.37595645832348	8
1037	1	-0.000157174670967291	0.000258614941588147	-796.219053648666	3.12552627480844e-06	1.26608665848922e-06	5.06592683112543	58.7106248130916	0.52077492080557	0.0173394825951618	0.000111772572249612	1.93764684652359	8
1038	1	1.12418972060413e-05	0.000218894122731733	-722.13202768438	5.19015829859103e-06	1.37334802026984e-06	5.89545509222653	92.9399960265296	1.35508095334604	0.0125582383720086	8.00499622327106e-05	1.81449663056585	8
1039	1	-2.26483022245514e-05	0.000320682737770452	-1048.98941864704	2.99721900976849e-06	1.2344812677318e-06	4.85172673566446	85.9601784553484	0.533075038393064	0.0184195333087871	7.15845556449837e-05	1.25054242519404	8
1040	1	-1.31853134961036e-05	0.000167946474260551	-542.322417934048	6.21391538407525e-06	2.98539893982349e-06	11.715852231903	85.5109722137705	2.10842016752701	0.00965223381916758	0.00017278783400727	1.49451840366821	8
1041	1	-0.000262022520498745	0.000154494722899514	-415.751039325773	6.84877723222826e-06	2.22354241982705e-06	9.33926321502474	30.5246146983249	0.747991731499334	0.0174281306105968	0.000344160556849304	2.18721585076434	8
1042	1	-0.000663226963780163	7.05330186852272e-05	-3.43309290448469	1.25085837044248e-05	5.08164640659571e-06	20.8080030961735	6.07048815200403	0.448718084098372	0.0382143856309654	0.000713334764298878	2.85914850834651	8
1043	1	-9.74017308666624e-06	0.000301224022366718	-990.049476566434	6.67784888264332e-06	2.24437980643277e-06	9.438653585752	88.1479683261038	1.26894094676051	0.017267884988712	0.000129119769658383	2.07442137545966	8
1044	1	0.000381400127018462	0.000305619120095716	-1130.42193216309	7.99301937978301e-06	3.95824152228955e-06	14.408085385147	141.294510557417	0.688806157714578	0.02800287278734	0.00038449265571578	1.47358939133365	8
1045	1	-0.000440982910199478	0.000210326921969049	-545.380977669249	8.08220151435068e-06	4.06866258027448e-06	15.4161436828025	25.4988212229157	0.593259204878516	0.0279931548694208	0.000429848536456571	2.69645288787431	8
1046	1	-0.000207782838072584	0.000222639143965189	-662.456176995184	4.57469581742154e-06	1.59744897386086e-06	6.53464806353409	46.9768178246088	0.661802277790432	0.0174486007340704	0.000190944880758997	1.57119987982032	8
1047	1	0.000388841470112197	0.000348792942005733	-1276.94671029528	1.21788531943235e-05	3.15965902159843e-06	14.3832743442079	138.107719664409	0.928562252746631	0.0299287045319545	0.000533321255039816	1.76943738778002	8
1048	1	-6.04437523530211e-05	0.000317270682288111	-1026.44297343434	8.76334465375411e-06	2.72011265471291e-06	11.756175867902	79.2137431333388	1.5298093857055	0.0185052174762745	0.000179634324400322	2.14192988090902	8
1049	1	-0.000186849550343173	0.000253734619873696	-774.117067527159	8.94257069722373e-06	1.64156846319692e-06	7.99888794561543	53.6321602196026	1.32121613895068	0.0180544451582705	0.000313116752647683	1.97896232282424	8
1050	1	-0.000181181454121174	0.000231146365516352	-698.988580467856	8.86700966973391e-06	3.94507234438169e-06	15.9447190671319	51.9092799942998	1.441862571862	0.0168273477509899	0.000360384584345415	1.99285187365176	8
1051	1	0.000153775590649036	0.000309873221118827	-1072.78862460148	5.46369134186596e-06	2.23344001842002e-06	9.11018453809231	116.393055194675	0.827123692454959	0.0198203928640339	0.000180289798620641	1.54105772502896	8
1052	1	0.00033705614756999	0.000309480403918069	-1129.41485249069	4.36992149013388e-06	1.15363816223495e-06	5.1446125932745	137.442269813898	0.385062562448889	0.026217745957922	0.000189768299020664	1.05803156299146	8
1053	1	0.000269126885992238	0.000286134907067237	-1030.62801783001	9.47229657350621e-06	3.59972405826221e-06	13.0434524056546	133.245542476273	1.06877071933791	0.0225065560032931	0.000401037688440898	1.6739564061478	8
1054	1	0.000557888547912479	0.000303816937534341	-1182.29159002414	1.35044539085299e-05	4.49944629415234e-06	18.8994120409233	151.428014821359	0.68290956840214	0.0363972202590332	0.00069061365688215	1.84501561720234	8
1055	1	8.18981367529185e-05	0.000256123470735888	-868.12945487318	1.42042988853235e-05	4.97928567860383e-06	20.9483338075326	107.732216506947	2.90085212011191	0.0154067630533916	0.000367807113243064	2.42329440055523	8
1056	1	0.000125564381694581	0.000314809133409394	-1077.59288356578	3.0302296334996e-06	9.19762044235491e-07	3.72407354163952	111.745018318054	0.479285069753505	0.0194190599619048	8.08286435508612e-05	1.17837037380026	8
1057	1	0.00022749105208166	0.000319777321631872	-1128.27220049024	3.71778417292142e-06	1.38556669827855e-06	5.38549573166736	125.428221240858	0.45757042887555	0.022485195507727	0.000139398250122363	1.93954304017907	8
1058	1	0.000308587568322759	0.000322204532536182	-1162.63866273212	3.115133378982e-06	1.34566766751289e-06	5.21900664118462	133.763343071057	0.312676472378405	0.0255620111408064	0.00013543059423473	1.31787677936569	8
1059	1	-0.000390910906617971	0.000115853778095692	-243.508390910747	5.96504391374987e-06	1.77653538829866e-06	7.65089924683964	16.5081777435387	0.337683317929319	0.0233604819106858	0.000328957665365206	1.7121485451144	8
1060	1	-3.60554193013292e-05	0.000276755639753474	-897.634185542887	5.17402372643128e-06	1.41499951588027e-06	5.83459582082916	82.5773744161487	1.05395191146178	0.0159909301012249	8.90500572303729e-05	2.41761400011292	8
1061	1	-0.000393962400688216	0.000172393274508625	-433.146158443526	6.28742803038637e-06	1.82379853868293e-06	7.78208109895515	23.6336163680886	0.402913399996911	0.0246389034398931	0.000332676627131919	2.48820508376444	8
1062	1	-0.000131350101867703	0.000208466528193068	-638.664080217093	6.5428327029593e-06	2.00713747053374e-06	8.71054624256039	57.7858871354973	1.31105585459863	0.0141174684641783	0.000222268404189721	2.13610906896327	8
1063	1	0.000222315549574749	0.00030010999063139	-1060.29854958282	8.03071817385364e-06	2.40650258380209e-06	10.4733473297675	126.530316497167	1.01404862830327	0.0213990491500624	0.000295449968477704	1.82542637463128	8
1064	1	0.000182726172833709	0.000360339539479279	-1249.53480004913	7.53124636730471e-06	2.50906819398356e-06	10.581370988431	116.889312175015	0.966057727783258	0.0231487301613811	0.000233507748018404	1.96920012077485	8
1065	1	-2.87779515976447e-05	0.000360994842593775	-1183.2995092467	1.94623844639815e-05	3.44470338938412e-06	9.11196817576263	85.4421077784299	3.06979719859843	0.0207490979974807	0.000215777999383531	1.83165063784274	8
1066	1	0.000498359189275801	0.000338826450013671	-1280.92322620562	6.0723029758114e-06	1.29902306366259e-06	5.92091571980124	145.788842046542	0.340289797079147	0.0345282620848195	0.000290744763313493	1.7808915296624	8
1067	1	0.000169096793782206	0.000294254702184582	-1022.51383508388	1.61078544888984e-05	3.66344425652274e-06	16.9362748019255	119.884316118757	2.37785974935235	0.0194451059870175	0.000494544655679549	2.40750885907227	8
1068	1	0.000405506980470973	0.000376198786870867	-1376.58492573763	5.2292446716872e-06	1.21955160635171e-06	4.82224304873449	137.14716290928	0.379855835202803	0.031692458841178	0.000224729906523631	1.83106024440933	8
1069	1	0.000418383456594234	0.000376730334338506	-1380.37335965725	1.24827217484284e-05	3.19419326343031e-06	14.650974232508	137.998776482223	0.883706760053593	0.0322575948370059	0.000545418316087478	1.08226355042054	8
1070	1	-0.000274012360430228	0.000236469048445112	-684.360089758924	3.79202004773695e-06	1.35719657012349e-06	5.4185712346062	40.7937594881193	0.424579818804015	0.020737619358016	0.000172152613146153	2.38415742785964	8
1071	1	-6.95616665490015e-05	0.000334174318991453	-1078.5032089907	9.61182076428567e-06	3.05385989794163e-06	13.2243800616209	78.2412393609101	1.58300049766311	0.0195571983779246	0.000204792633036643	2.45057200382361	8
1072	1	-0.000167552641582457	0.000252400574873032	-772.473397852456	1.45142393758712e-05	4.92402639097225e-06	21.002019980188	56.4223528727837	2.34424429824718	0.0173578726811456	0.000516513664785873	2.87838683010045	8
1073	1	8.47610173013436e-05	0.0001858457891899	-634.554462342029	1.07051732007334e-05	2.75604171062198e-06	10.2337805752775	114.51690020544	2.75084414968799	0.011703367600262	0.000292271867716274	2.1554732994096	8
1074	1	0.000215271317373054	0.00025425519324865	-905.212646723488	1.13792403096991e-05	3.19123288468153e-06	13.3627991938764	130.253728924173	1.53511855028983	0.0190879610655088	0.00044380318998733	2.20083749093085	8
1075	1	-0.000295777020551672	0.000280855426447111	-827.399484417918	6.43128852559499e-06	3.13005838246328e-06	12.4495392400339	43.5176803423095	0.699030158634937	0.0233696412525148	0.000294366537388394	1.83194965335125	8
1076	1	-7.97130351161213e-05	0.000172820343880315	-538.125691146321	6.20507953899069e-06	1.1126942414995e-06	5.36480583275019	65.2385814126538	1.70209741173355	0.0109044328230539	0.000159765682012976	1.44575094787	8
1077	1	0.000398089008609003	0.000298062199652764	-1110.72602675858	5.6508824986289e-06	1.17792101987797e-06	5.25871960132718	143.176607036853	0.405045638152582	0.0284936867316219	0.000262312483747387	1.78994535851792	8
1078	1	0.000134450054588116	0.000408923384044676	-1401.12754029575	5.36090561283177e-06	3.23715645910215e-06	12.4675184369348	108.20036501751	0.691088550400384	0.0246634957908611	0.000200621795291781	1.32629067442772	8
1079	1	-0.000224834145696628	0.000192234454939163	-553.910051841622	7.35178828588868e-06	2.55903365243879e-06	10.7708266617125	40.5306280685489	0.999119592873725	0.0169487534186032	0.00033403470994118	2.17917789390042	8
1080	1	0.00056836234011411	0.000347948040034117	-1334.19658738034	1.25880364716222e-05	1.84595500520021e-06	9.77799617808881	148.525279963517	0.581066641471421	0.0381825306606629	0.000617599098622904	1.20931014280387	8
1081	1	-0.000321996254109099	0.000139297291019751	-345.08215968355	5.07269729866003e-06	1.50529772565211e-06	6.46764289609624	23.3935654973652	0.398872659459489	0.0201013742578482	0.000268941966772915	1.48330003339974	8
1082	1	-7.96801544239653e-05	0.000163203193133851	-505.20345089521	4.94365129922919e-06	1.57242409372906e-06	6.47864476121055	63.9771349247687	1.41829768720476	0.0104058046330238	0.0001483157691822	1.66774915302563	8
1083	1	-6.96303505843889e-05	0.000285059547854089	-916.315069505563	5.78545137875063e-06	2.64482333997585e-06	10.6563584312899	76.2733806642779	1.10419630722706	0.016812902140714	0.000166905614096678	1.15678055876968	8
1084	1	0.000376485810997552	0.000203855236849999	-790.985750978474	6.65809879817749e-06	1.22735171207413e-06	5.31547366519767	151.565847115266	0.448176219819693	0.0245302564782719	0.000337127841758689	1.67838424432773	8
1085	1	-0.000359516850987436	0.000253219088463116	-715.718215125201	9.27296401573323e-06	3.33091863949619e-06	13.8110671926294	35.1582478520475	0.780990149720535	0.0251953099534319	0.000448059872749664	2.73217758566043	8
1086	1	-0.000384372425960295	0.000180315678180614	-462.243241674459	8.82236904190124e-06	2.73021921698424e-06	11.8006451462191	25.1320767602395	0.605764735065762	0.0243258126282342	0.000462428158581856	2.89506977725743	8
1087	1	6.67915790977089e-05	0.000267672852371148	-901.254289313891	5.46923403438353e-06	1.76874590947284e-06	7.55003052131308	104.010728913233	1.10566090686747	0.0158067692796351	0.000124192961544986	1.16948135912974	8
1088	1	0.000178106357590652	0.000308016974998219	-1072.5262845866	7.10987740096277e-06	2.27636932662371e-06	9.64738993685355	120.038026532035	1.00798989321847	0.0203860541782603	0.00023308937496876	1.46102269669177	8
1089	1	0.000425722256149343	0.00035197996556748	-1300.72865600583	1.04752264778715e-05	2.66633561378889e-06	12.0025818898095	140.416632651137	0.724408584040224	0.0316493335947143	0.000472694376964176	2.35432099761461	8
1090	1	-0.000384995894863218	0.000240953312316715	-665.05487914267	1.23072123440886e-05	4.00386796361051e-06	17.1510287921587	32.0407794092336	0.928311157897903	0.0260226499257783	0.000610000242243791	2.43721785768105	8
1091	1	-0.000489395125702871	0.000199299536510882	-492.925124925175	7.86856338934552e-06	2.23202376661866e-06	9.8929328998174	22.1579448375105	0.3921541689073	0.0302762437289061	0.000420316791442912	2.46924808070505	8
1092	1	-0.000201416874350941	0.000171639247045389	-493.917253597739	7.31152600237225e-06	2.23110344174267e-06	8.38939899357897	40.4362826359669	1.09060887838035	0.015162154882205	0.000329455073868709	1.41192412353213	8
1093	1	-0.000149391889029675	0.000181770653329414	-545.768556801267	3.63234603038925e-06	1.3016260113338e-06	5.31662743484156	50.5842326729345	0.712379606081258	0.0134807734011702	0.000144157464412594	1.40484859022588	8
1094	1	0.000431492772995781	0.000367174965527872	-1353.97239263936	1.09204169433652e-05	2.66904739090724e-06	10.5431599588105	139.604171649232	0.744626388491465	0.0324621625661621	0.000486715917740838	1.7066578145391	8
1095	1	-0.000289527945055752	0.000184780739894102	-508.32475960998	7.64408611076301e-06	2.38351989055122e-06	10.087837534845	32.546582192554	0.763510909735425	0.0196792731986193	0.000376431350921186	2.86144694907275	8
1096	1	0.000211858172946562	0.000402966272437985	-1404.16771249635	3.67641282236351e-06	1.83324253328164e-06	6.84022755296498	117.732999493917	0.423371965422992	0.0260847286454577	0.00013510043490191	2.01985565264862	8
1097	1	-0.000738601758329145	0.000145347196445675	-233.130295023085	8.73330117449077e-06	2.53031253531823e-06	11.1646101057443	11.1328106209045	0.22843272639406	0.0431303718538913	0.00049176232814625	2.38462766483385	8
1098	1	-0.000427756381507521	0.000211863609102419	-554.140755364737	5.54720855409844e-06	2.61654565296593e-06	10.3233711625952	26.34877043324	0.408087109681345	0.0273500595591543	0.000292480862029248	2.25282681875539	8
1099	1	8.34612189896725e-05	0.000361420504195627	-1221.04987027987	6.18319774417262e-06	1.38273913394351e-06	6.0644568062545	103.003118616143	0.931833367803962	0.0212528376506214	0.000110963623127633	1.56482974894345	8
1100	1	0.000168698498002197	0.000366039448489368	-1264.54033437898	3.57585669570553e-06	7.16982058183143e-07	3.2623682845391	114.743803335854	0.463631791977741	0.023092690149582	9.35196402188324e-05	1.47941601019806	8
1101	1	0.000173265100677628	0.00037164548991224	-1284.83750588664	3.77702277780772e-06	6.79855046834283e-07	3.26525092786443	114.995436325995	0.480010622884155	0.0234941444480512	9.80207668644434e-05	1.21462883442075	8
1102	1	-8.50392225120566e-05	0.000318256266046233	-1023.60480416798	7.94121419635791e-06	3.30375510796291e-06	12.9644857201933	75.0398646530197	1.34260657459976	0.0188744779320587	0.000217346193974103	1.95118302874348	8
1103	1	0.000198004683553992	0.000345956564476538	-1206.63797909971	3.25007989809473e-06	8.5378084425812e-07	3.57142887379515	119.784220403045	0.410006561743642	0.0228388036588569	0.000101777953539213	1.36558313346988	8
1104	1	0.000202971830409575	0.000337775466624269	-1181.17403289528	7.74910386726084e-06	2.60925780616817e-06	10.8118037301334	121.001975912304	0.985308031008444	0.022578449602662	0.000262140620392195	2.19816625757952	8
1105	1	0.000923995446889779	0.000466744416741193	-1845.40446513502	1.46291132528244e-05	4.05568822322898e-06	17.8821310334725	153.199963884098	0.416441576695095	0.0593119857448414	0.000755452885807805	2.16969976636727	8
1106	1	-0.000219239036113965	0.000218055435090989	-643.416359711608	7.25378500968322e-06	1.78681718700211e-06	8.00740454690088	44.8449210266613	0.976472504227936	0.0177167149342381	0.000303390891879487	2.45931554569777	8
1107	1	0.000160566570945087	0.000225799774613801	-793.163682965697	1.43749945013132e-05	4.13859162036067e-06	18.3920809607746	125.416691651623	2.47282938703641	0.0158748768348005	0.000514942644309182	1.69860273925052	8
1108	1	1.10707163252022e-05	0.000297933360693836	-986.654750781469	1.44110655971223e-05	5.01758201368108e-06	21.3175729805655	92.1280383774365	2.76781271208149	0.0170821044546017	0.000288919425091352	1.57177293862041	8
1109	1	-9.13158542143411e-05	0.000262508330072649	-834.728431206321	4.75709044184076e-06	2.57230455526222e-06	9.80467003175696	70.8193157682251	0.94246049142716	0.0159246406405771	0.000165517115924296	1.61534715550095	8
1110	1	-0.000291564153921792	0.000231728950496231	-666.344933522381	1.09151593463665e-05	2.00912015396262e-06	9.84611054222305	38.4769259349239	1.07244984520963	0.0213389629037692	0.000494805283718128	2.32932369554658	8
1111	1	9.32220412175159e-05	0.000400436332897308	-1352.05893045405	1.8033880365461e-05	3.18040982287001e-06	14.4461348574925	103.105101767405	2.44975436146115	0.023556829751243	0.000293914679248493	2.35768020919378	8
1112	1	-0.000182808925684484	0.000218432172034016	-657.381349419531	3.78501761714699e-06	1.28947237946769e-06	5.16403057692612	50.0735682556422	0.607138881875126	0.0163199173380519	0.00015027483526242	1.51554216952926	8
1113	1	0.000446536799877689	0.000329388743265411	-1231.75353594864	1.07966552824407e-05	1.51416280153836e-06	8.07126819720235	143.585586663826	0.673647452874731	0.0317922914446456	0.000500473785162768	1.1406575959117	8
1114	1	0.000242461044601579	0.000357397824646868	-1259.32738000192	7.69358127603385e-06	1.04476229118746e-06	5.42092685468605	124.153227772297	0.848225908017141	0.0247449149032377	0.000252383279359491	2.06197600379858	8
1115	1	0.000372148572790282	0.000489382993332308	-1740.12623846213	1.66328604645652e-05	4.3443049883904e-06	18.4466555547393	127.250971578368	1.25793883515211	0.0352259642891681	0.00060993076753699	2.19950839481591	8
1116	1	-4.72025095014607e-05	0.00022016590931381	-705.190586377098	7.47568522157459e-06	2.03093771520097e-06	8.80318384789386	77.8992465504268	1.86312382280095	0.0129012364409391	0.000144940983377767	1.82996054634024	8
1117	1	8.31546462541265e-05	0.000239661222253874	-813.43296106844	5.84844201358953e-06	1.69445714156852e-06	7.41796567512967	109.135110274843	1.25423982046324	0.0145346410631362	0.000143101296595792	1.63146364106599	8
1118	1	0.000579451373894188	0.000328830649041911	-1274.09576759874	1.02510418985624e-05	2.52028052199762e-06	11.4634588441744	150.425688265269	0.474172645895348	0.0381734978418251	0.00051576799387057	1.66910481466828	8
1119	1	-4.55998536580706e-05	0.000162599194986067	-513.744525124	8.15714226941876e-06	2.39948510215618e-06	10.5449059808202	74.3342039457587	2.67383814476925	0.0096756685213677	0.000182892388164544	1.54513040187988	8
1120	1	-2.06578122495453e-05	0.000295083823883584	-966.679568680187	5.81087262526899e-06	2.10937159871478e-06	8.54840744926703	85.9954513261661	1.12314422921954	0.0169484366628581	0.000122784552619054	1.42080601962494	8
1121	1	-0.00023641507917214	0.000264052068158776	-791.356708147367	9.37220310435939e-06	2.94938903024234e-06	12.7585609059987	48.1607991814853	1.17273276660461	0.0203069348682163	0.000379675048815107	3.00141543479835	8
1122	1	0.000368642067217657	0.000286701340759918	-1062.9457585352	3.96506692348525e-06	1.05002113740498e-06	4.32234861689015	142.126979085741	0.31548517118656	0.0267574726082103	0.000183094923427623	1.71813395211412	8
1123	1	0.000158935087213802	0.000207674859581693	-731.944428976849	5.83449889397718e-06	1.53978463033455e-06	6.82364239727632	127.427094107814	1.03563017871706	0.0149836083704997	0.000214907189442133	1.4663011960578	8
1124	1	3.33750729473618e-05	0.000265731403957585	-884.599159302684	6.4936276039115e-06	2.09925787656576e-06	9.01603271796727	97.1586944433262	1.37951831230157	0.0153449041681597	0.000128031223337856	1.35395709120498	8
1125	1	-0.000258488323126046	0.000279463149005133	-835.876728408793	7.7090766276509e-06	2.34603740918736e-06	10.2358308280485	47.2328418562828	0.884893322014906	0.0218112511358584	0.00031573809389842	2.20918966131502	8
1126	1	8.00392776662731e-05	0.000334894447174952	-1131.65319753945	6.47610527777314e-06	1.92321702239413e-06	8.43405799536871	103.441465571687	1.05074013117181	0.0197284409825613	0.000137570505123001	1.61563162647167	8
1127	1	-0.000215941812092811	0.000318141788416678	-978.608683319896	3.42732478127333e-06	1.0335204412445e-06	4.29325670837861	55.8329215333653	0.431324084187827	0.0220305848050941	0.000120677563144861	2.21583104995813	8
1128	1	0.000310959736683249	0.000264478196427069	-969.281178862951	7.79863753550405e-06	2.08034098225726e-06	9.16931125608552	139.618093920815	0.743214240269798	0.0233893594184735	0.000349019245077644	1.36745246968208	8
1129	1	-0.000487221287893715	0.000155678906292394	-344.681488162022	5.33410226958032e-06	2.34791295953314e-06	9.49242558819994	17.7199299654819	0.309578557961098	0.0293061308530014	0.00029398669873518	1.51461931420344	8
1130	1	-0.000325389271100255	0.000277994196164193	-810.820885847402	6.15887312214345e-06	1.92050173948906e-06	7.79988750653244	40.5087044802975	0.570148707446178	0.0245209154369661	0.0002776528812898	2.27406392428392	8
1131	1	0.000203564509182558	0.000247172919739806	-878.308140093094	1.25757141804964e-05	2.14891686017995e-06	10.4590145973947	129.47388804774	1.75408751916647	0.0183465482942324	0.000467819250166213	1.71596817016227	8
1132	1	-9.667167361721e-05	0.00027357222040965	-865.798355885403	6.44740552992629e-06	8.18780994129153e-07	4.38089668217195	70.5382208061678	1.20162940632076	0.0166243847527312	0.000130785811100757	1.16177089769806	8
1133	1	-0.000159208749240316	0.000320838215701346	-1005.32603012345	8.61584208994983e-06	2.68474012336116e-06	11.5210772867499	63.6081277768172	1.24928856770561	0.0205215355081521	0.000259108120269923	2.32195661903868	8
1134	1	-5.5898514570728e-05	0.000346993454939219	-1126.14957769495	8.06712265691566e-06	2.66783938063159e-06	11.4148270812297	80.8486244393448	1.30019569166705	0.0201375789374083	0.000167862742717746	2.45769259451467	8
1135	1	0.000201716737674652	0.00038541381170002	-1340.56066220275	2.58181085735338e-06	8.89919367879258e-07	3.35912129887102	117.626527233112	0.306147614872695	0.0249242189016172	8.21342320566867e-05	1.11116913836025	8
1136	1	-0.000399383152835128	0.000217413192912802	-582.494890490062	6.20290744195606e-06	3.21807217433899e-06	12.3490552400432	28.5626557065108	0.516206379408312	0.0260538576736167	0.000324356098507127	2.82099030333275	8
1137	1	0.000421687529680698	0.000367285953853915	-1352.94416696119	7.35324751128617e-06	1.24086763564308e-06	6.02315490719771	138.944435375823	0.504026409003548	0.0320405498792695	0.000321111755345938	2.28457651802546	8
1138	1	-0.00025099660335235	0.000202326846120398	-580.375081799601	7.45252073946391e-06	2.35996224761698e-06	10.1765384915968	38.8720776337131	0.893057531387999	0.0184715977462133	0.000343098658722659	1.65075498281713	8
1139	1	-0.000514547584354007	0.000138854973979553	-280.671285270118	5.18238056876042e-06	1.7423203495547e-06	7.33918778180893	15.1020115892265	0.231891397327215	0.0305360095360925	0.000287851008129638	1.70401283480781	8
1140	1	0.000447713083446549	0.000318258151092463	-1195.0284941398	5.44813116875501e-06	2.14290052157399e-06	7.52469290345413	144.592771034012	0.376289385655291	0.0314728170837952	0.000264180927723689	1.79884483485585	8
1141	1	5.86688769596327e-05	0.000323002831996681	-1085.2358917671	7.12749450750634e-06	1.4516946300441e-06	6.81535219515378	100.294730683465	1.22476680153585	0.0188095035807976	0.000109652089034312	1.61324155253875	8
1142	1	-0.000684126973200152	5.55263954550611e-05	54.3684070286306	6.33334353956445e-06	3.5362599275387e-06	13.3806505582863	4.6401760985006	0.297316553695833	0.0393264786295902	0.000362055542629405	2.54895524238535	8
1143	1	-0.000210188954926089	0.000231754036660451	-692.503088637475	6.14582449197999e-06	1.95673057298849e-06	7.99528651416014	47.7935931147929	0.867731447196216	0.0179262849842701	0.000250715052165819	2.10887191595909	8
1144	1	0.000225118929664672	0.000359400485184326	-1260.14929155947	7.31065827968534e-06	1.79636171997326e-06	8.02999315269436	122.061937321234	0.8469113461386	0.0242982220441945	0.000238847776154046	1.22644162969679	8
1145	1	-1.10155431241332e-05	0.000213639812229066	-696.681643513165	1.60018797852901e-05	5.11048650947071e-06	18.2876990069399	87.0483698652278	4.28072426064036	0.012256919866303	0.000296207366037507	2.4263531011081	8
1146	1	0.000230294997877052	0.000342613381371481	-1205.9759845407	8.79019885988716e-06	1.29432329669878e-06	6.45242183725739	123.907874985715	1.01747240699264	0.0236527981549557	0.000287623183369446	1.90188705320284	8
1147	1	-6.5226712868897e-06	0.000269207131381354	-884.146239039248	5.17568244936599e-06	1.69772149022426e-06	7.22246087745544	88.6120411142956	1.1009371605972	0.0154289589141001	9.7508653134255e-05	1.27488536627151	8
1148	1	0.000120557002529173	0.000356580957353611	-1215.94684982724	1.44198198164253e-05	2.90637260502165e-06	13.2919983324326	108.679959869695	2.08413524824916	0.0215666639215044	0.000308068874288584	2.27369540953981	8
1149	1	-0.000156578010671436	0.000170530428622224	-503.747935293935	6.50589009803023e-06	1.9349686706729e-06	8.33858533882124	47.4424022465038	1.22943805478388	0.0132645977312222	0.000265005527802427	1.85117842753996	8
1150	1	0.000134125090718449	0.000268329851212326	-925.565150085749	4.35905956013448e-06	1.43257206423657e-06	5.69714586762022	116.558246100529	0.754692699333068	0.0171878212771617	0.000133641456007634	2.38517725656176	8
1151	1	0.000228071896849359	0.000311647589911962	-1101.81815753208	5.98304394962205e-06	1.54506589885728e-06	6.94964712732476	126.1976464029	0.729007352223368	0.0221269294639512	0.000214684793058273	1.63422933571034	8
1152	1	0.000208491039310087	0.000226094382006611	-809.872345928174	1.02550177606808e-05	2.72995802315107e-06	12.1744934114472	132.680441820561	1.44618171368888	0.017621333249167	0.000414583749833699	2.07474627971268	8
1153	1	0.000540875873111928	0.000329028953503574	-1262.24328243749	7.57380645306561e-06	1.62921777987223e-06	7.42425555158301	148.686755899037	0.377850787506622	0.0362735528140377	0.000373898464304543	1.31556074079377	8
1154	1	-0.000145473200730186	0.000213131760130304	-650.287622876081	1.25752256254588e-05	3.7223408956492e-06	16.3099862394571	55.6844875123251	2.35277824107489	0.0147849309705919	0.000442737831942807	2.30905251545399	8
1155	1	0.00023712716793538	0.000355091102045519	-1249.72471417051	5.72824633673532e-06	1.0852429692407e-06	4.45674077106169	123.734701215088	0.644318255782925	0.0244646244146054	0.000189460835005667	1.52315661813165	8
1156	1	-0.000212488866367567	0.000234360773728182	-697.542104738718	1.54621365742576e-05	6.25138633565393e-06	25.7648912708185	47.802214717574	2.20964843237949	0.018125443890284	0.000651543575174847	1.95925391917567	8
1157	1	0.0003007015931904	0.00033187427608395	-1191.86880835403	8.13629852864032e-06	2.54920716647762e-06	10.9589769968537	132.178805599059	0.801871801170044	0.0256594244680457	0.000331197463688824	1.9462107680182	8
1158	1	-0.000146198786197198	0.000271177764249427	-846.782226832865	4.10402166979842e-06	2.41503512923458e-06	9.04304331821935	61.6697710573157	0.704842342329486	0.0176515138243474	0.000165186650900201	1.28911788270403	8
1159	1	2.77934045777298e-05	0.000255568004062936	-848.700053524975	9.65992423799143e-06	4.2617121967509e-06	17.0458644163236	96.2066105372249	2.14280641190922	0.0147293035300606	0.000250013290823894	2.165589222584	8
1160	1	-0.000234732337462163	0.00013204787276581	-350.025646780997	4.70845174388718e-06	1.31878840051273e-06	5.57429280998783	29.3597807037217	0.548616717170557	0.0154311806980445	0.000238024812526965	1.59407049700745	8
1161	1	0.000237937971135309	0.000252356835708081	-906.380324356978	7.12423009199986e-06	3.32334448718328e-06	12.9475514819638	133.315499101242	0.935444455370485	0.0198725057509819	0.000312421353316343	1.74089512331346	8
1162	1	-0.000159678505375344	0.000150589163920816	-436.351440269252	8.99406208766681e-06	1.3931424018328e-06	7.36259522034894	43.3219908069628	1.63243866163906	0.0125756496372844	0.000378880368153707	1.32418192002153	8
1163	1	0.000139839274807209	0.000284792706056335	-981.743667913753	8.74733550769678e-06	2.54684531325589e-06	11.2671114848802	116.152020013124	1.4323712306567	0.0181783808000944	0.000256814524398282	1.49201380824933	8
1164	1	-0.000178149662783984	0.000203426715276225	-606.414255981353	6.21574542329439e-06	1.92900477939021e-06	8.30248874148769	48.7899503803405	1.02674818337221	0.0154931567035987	0.000248927015239553	1.66851775081082	8
1165	1	0.000389201896076549	0.000322101470066514	-1188.3913420462	6.97629157692522e-06	1.838366473388e-06	7.75070922556065	140.389019135995	0.529398107263519	0.0289458498851332	0.000315172293170505	1.40619582313603	8
1166	1	0.000182959711969269	0.000260401029785286	-915.398349677484	8.83468690519706e-06	2.84440572099539e-06	12.0810046861381	125.092164360625	1.33431043852762	0.0182343713227624	0.000320103117098581	2.25695808933795	8
1167	1	-7.85691825959263e-05	0.000257882616284709	-823.941527228142	8.1687179519673e-06	1.51821889559188e-06	7.36923876550697	73.0555766651061	1.66341031335357	0.0154461342107481	0.000159782787512894	1.90587478894241	8
1168	1	-0.000267646057226877	0.000263246817703942	-776.956321316899	1.06743425982244e-05	3.31887752628652e-06	14.3503611157267	44.5252298521845	1.19810751773015	0.0215094557079851	0.000455964599122201	2.23294749371041	8
1169	1	-0.000100969417301451	0.000218168842019366	-682.355508521773	8.21437817773685e-06	2.68460788976728e-06	11.4196911918326	65.165110693801	1.79692772800278	0.0137739416726106	0.000241994418251177	2.07970333111989	8
1170	1	0.00034306246984283	0.000278080192735546	-1025.50070131687	7.46873098974241e-06	1.83721375409656e-06	8.10277516186358	140.972404909332	0.637660312679398	0.025302456296032	0.000338975674484789	1.4989571703241	8
1171	1	0.000260206690023881	0.000359453733494102	-1270.16942093482	7.6049084280114e-06	2.52318246345334e-06	10.6505976646815	125.900583763667	0.818012624104763	0.0254250292669553	0.000281061199872624	1.95698336109189	8
1172	1	-0.00066831156649643	8.21459112421543e-05	-40.9019761543486	7.65709469081755e-06	3.09526543078666e-06	12.6351822536527	7.00739585855496	0.273232052410894	0.0385796000772984	0.000435979133132051	2.37337001616138	8
1173	1	0.000288743972632086	0.000290546471933383	-1050.02130695205	5.19529837970706e-06	1.34808717406646e-06	6.12117044778401	134.821721089634	0.532306598430619	0.0234696210581546	0.000216862052268255	1.21830338034221	8
1174	1	7.85358785894408e-05	0.0002737559325282	-927.345204072194	5.69956906892505e-06	2.42331330918368e-06	9.5926572728276	106.007276775669	1.11034940705229	0.0163177525489004	0.00016100173403387	1.40352434086727	8
1175	1	-0.000260722659707162	0.000327234480935443	-998.885973114052	5.00348553295739e-06	1.50701683914055e-06	6.19050186516605	51.4540666884315	0.551097989604378	0.0239725630713963	0.000190979802305926	1.40944035804488	8
1176	1	0.000337535070292412	0.000339887601078655	-1230.94414915096	1.76719187469874e-05	4.42127597618878e-06	20.3550903960812	134.801025933932	1.54544648663217	0.0274454241623232	0.000735766791557852	1.63363054669106	8
1177	1	5.29440637058246e-06	0.000345503519790166	-1142.75630730409	4.53054438495543e-06	1.57213009030627e-06	6.29541546969849	90.8779169598586	0.751146620827215	0.0197982167713349	9.01536096112639e-05	2.07450168859545	8
1178	1	-6.10362918658223e-05	0.000300215054778323	-971.063929723829	5.10553533986829e-06	1.92494937218103e-06	7.8596414873373	78.5079082822918	0.938454949961517	0.0175529529118137	0.000122792509478756	1.76923369632063	8
1179	1	0.000475082007882012	0.000281371588719238	-1080.78976781505	1.04554872736689e-05	2.51094158318444e-06	11.5623974721747	149.363480556694	0.596600555413773	0.031636030734262	0.000520625127850514	1.68384174985357	8
1180	1	4.70817912455979e-05	0.000285848600332399	-955.733720884065	5.8000754788586e-06	1.63938664545174e-06	6.71044501738527	99.3531442094714	1.1330924366972	0.0165985895864083	0.000107269273724679	2.62685084512906	8
1181	1	0.000336958987850679	0.00037063099321053	-1332.20339529593	1.01783413882083e-05	3.38028214818249e-06	14.4876879286005	132.275527435906	0.899851095633087	0.0286999043842684	0.000417655028139773	1.66559288415217	8
1182	1	-0.000104040329449173	0.000248807303267417	-784.195804069514	5.64756545155849e-06	1.72755803949182e-06	7.36584303991757	67.3074518565484	1.11599106549195	0.015451755088975	0.000154669281810772	1.83044277037926	8
1183	1	3.15235794285363e-05	0.000240630256281083	-799.706830737165	4.89073308313031e-06	1.48874172782011e-06	6.44771534220933	97.4634862828988	1.14577997770912	0.013904902371479	9.20758495776208e-05	1.49037884908246	8
1184	1	-0.000584611799289271	0.000125381252967775	-212.283631451762	5.74842119526931e-06	1.95214415803612e-06	8.17868598912128	12.1048107411158	0.216332204374595	0.0342574781076337	0.000322890058006838	2.42614284967134	8
1185	1	-0.000569697812923024	0.000103856576899141	-145.18051182625	6.30256140616627e-06	2.49027465074442e-06	10.1248328657831	10.3316317405676	0.266952656595347	0.0331792389924317	0.0003561754952166	1.92702888912276	8
1186	1	0.000149866527829606	0.000400559355725111	-1372.59153604573	1.00568179248336e-05	3.05254451823693e-06	13.2588604847274	110.512990466133	1.26999061872104	0.0245040961500536	0.000260006432234281	2.32450637192655	8
1187	1	0.000183546083096995	0.000125855350254771	-467.370488138983	1.27518446143098e-05	1.67124456785218e-06	7.42917585247532	145.562034322118	1.8901731492305	0.0127512052714565	0.000605004678563532	1.84997508321533	8
1188	1	0.000137124695041074	0.000286885485152455	-987.281907047559	4.00961447732466e-06	1.01432822552459e-06	4.36548085046224	115.546732007583	0.656608875554686	0.0182184773833285	0.000112092368970831	1.54262521164151	8
1189	1	0.000295509502366104	0.000317232116921463	-1140.94782844867	9.28910946217081e-06	2.22588547553783e-06	10.2573948768973	132.969628513183	0.920369125334513	0.0248403510082085	0.000374581589199629	1.49354397038674	8
1190	1	0.000410848040475755	0.000339308804942395	-1253.6181900126	7.58686685309572e-06	1.88715108905716e-06	8.66132565680617	140.447577655722	0.542536611257566	0.0305299163916288	0.000342167517548824	1.57604413036027	8
1191	1	-3.24951853435827e-05	0.000278378739005224	-907.192425130897	6.4793411702548e-06	1.92571114898054e-06	8.25175999989087	83.3419878400638	1.31643952382134	0.0160582250043717	0.000117740581450919	1.47934866920674	8
1192	1	0.000404170298324875	0.000422857361037622	-1530.78470658315	1.42483481431157e-05	3.23640496561534e-06	15.2808555838968	133.705596295983	1.0324059640502	0.033514940803002	0.000579782523844721	1.71284157438279	8
1193	1	2.24438888098691e-05	0.000256532974161655	-848.949437637276	1.12554419052055e-05	1.59526896070446e-06	8.10039740084443	95.0000358519282	2.49496109601689	0.0147544021535282	0.000107004827418135	2.50708306602747	8
1194	1	-6.55319843558611e-05	0.000264919856984495	-848.549442453152	1.40191951028182e-05	1.94572314880712e-06	10.7123129285372	76.105920820103	2.85886738553153	0.0156362867723203	0.000221165953145906	2.50135231279887	8
1195	1	0.000105441015488323	0.000345459168392651	-1175.74234617095	4.46609137534275e-06	1.30804772416775e-06	5.49765410485388	106.973232621394	0.680296905462477	0.0206947908662301	0.000103529146080659	1.4459004955304	8
1196	1	-1.14241070989257e-05	0.000248716884040334	-812.387531514324	8.42719789092141e-06	2.04913121029903e-06	9.07630006312976	87.3701287383208	1.93736900762989	0.0142654520345218	0.000119357068158939	1.96911598625925	8
1197	1	-0.000214555320714469	0.000292094619809653	-891.548941305095	9.92529973042256e-06	3.35574089199253e-06	14.2295349439293	53.7012114870589	1.30300214337182	0.0207655304250807	0.000370605708548735	2.08437715098319	8
1198	1	5.61241686593552e-05	0.000181104806980648	-609.455204985226	1.97396130649326e-05	2.03752668676969e-06	10.7595762127576	107.218147891685	5.70069802865818	0.010863387474501	0.000352869317025394	2.33740944603759	8
1199	1	-0.000307745246577768	0.000237361732995869	-681.956058815949	9.39449608014974e-06	2.68277539567387e-06	11.7369255503271	37.6427481127658	0.901962890860097	0.0222679229835592	0.000436432687904742	1.84229912936428	8
1200	1	-0.00018117737710759	0.000228993773188625	-688.000937299406	2.70098338297605e-06	2.30830451792509e-06	8.44370422833152	51.6493390811257	0.501723787726785	0.0167303073200458	0.000141342461743666	1.41339655305101	8
1201	1	0.000290320572064075	0.000344485845647376	-1232.25642022507	6.72349267232272e-06	1.608903284468e-06	7.36771999947421	130.12301275804	0.667025755808194	0.0258121464336512	0.000258066011652147	1.46030082363702	8
1202	1	0.00011079167742874	0.000326584336300445	-1114.10045893145	6.03121119306321e-06	1.52889639813641e-06	6.89602167049784	108.739181493458	0.952408708124532	0.0197593295107765	0.000138586269805304	1.689607069209	8
1203	1	-0.000449144040072235	0.000200169783117456	-507.891560274761	7.40756955601177e-06	3.77463878920873e-06	14.7818204062039	24.0210732418878	0.533697513414055	0.0281740465939606	0.000397536541155834	2.75266760389631	8
1204	1	-0.000282487567496298	0.000218494714696831	-624.754100053911	8.02831279074129e-06	2.1387523835732e-06	7.68993390569361	37.720756209811	0.833464738912329	0.0204618266054979	0.000371495552219705	1.55658364088278	8
1205	1	0.000263053469358298	0.000395806631289111	-1393.41708135505	1.41668793848929e-05	4.36699020206583e-06	18.8878198124039	123.608050651697	1.45200504631668	0.0272296637334932	0.000495258399284107	2.95523547455077	8
1206	1	0.000624389384038482	0.000347776954981603	-1352.3546998215	9.71666335834291e-06	2.14674568808458e-06	9.22724226258932	150.882748628248	0.407765718284865	0.0409498808201079	0.000490036746068921	1.86224998268784	8
1207	1	0.000248630033287326	0.000238523386852626	-865.400450994802	6.56700765953575e-06	1.43949823760757e-06	6.54977656184357	136.188506750204	0.775502867107475	0.0197408939742445	0.00027745719213637	1.73555106603239	8
1208	1	0.000175603111533754	0.000310337382870302	-1079.25953658933	3.58508044026969e-06	9.58465995852804e-07	4.16524660716831	119.503170198974	0.507069184187547	0.0204302427761718	0.000111881288591676	1.5295109199614	8
1209	1	0.000198065692800783	0.000314920628556204	-1101.82883557963	2.87637234821454e-06	1.27433896626059e-06	4.79972328156166	122.167366044404	0.389272954162195	0.0213156477827852	0.000107324022417887	1.23135379645467	8
1210	1	0.000353041299558794	0.000353439094692866	-1280.86455546305	1.03621610387308e-05	3.64355733955845e-06	15.2771424023552	134.967738694421	0.891202827358005	0.0286225143137244	0.000444815782727131	1.9609505336903	8
1211	1	-0.000431347079446711	0.000236488846176609	-635.866146295481	5.31357820996789e-06	1.87998964667023e-06	7.70756775896229	28.7340429426809	0.354102822438624	0.0281850535270394	0.000271932376646608	2.50192160043477	8
1212	1	0.000212613058006585	0.00019104594762612	-693.946677638278	8.19033381353177e-06	1.35663696251067e-06	6.55211901077896	138.058350128327	1.11578603407874	0.0163772609022317	0.000352901336352488	1.65741140957548	8
1213	1	9.01834103965811e-05	0.000334459423614739	-1133.66731163905	8.02793002288184e-06	1.62788844632604e-06	7.7280293061811	105.090311896793	1.28395715184123	0.0198475213439906	0.00014983161738945	1.64834419066879	8
1214	1	0.000223337358910288	0.000348401880816887	-1224.49103407147	3.79553743736705e-06	1.44130478417756e-06	5.5816077655145	122.661241404956	0.455315082646294	0.0237112771681041	0.00013640775679319	2.10068787357852	8
1215	1	-0.000255723463651856	0.000192723412160104	-546.475327588062	5.02537466095726e-06	2.08458453249841e-06	8.43083903234035	37.0031381376018	0.617746150374878	0.0183468920051553	0.000240918184388008	1.64044162195662	8
1216	1	-0.000645768910076094	8.51419923812002e-05	-58.2440515333238	8.57930142090489e-06	3.02162768773776e-06	12.752806928982	7.51089288469962	0.281371755466805	0.0373200326893084	0.000487865149357499	2.49058151690047	8
1217	1	0.000186771577692333	0.000298670630263779	-1045.97957887146	6.76352456500525e-06	1.69935424124388e-06	7.57633135895604	122.019511716781	0.944179882571205	0.0201830641149741	0.000221431058200967	1.45888664651168	8
1218	1	8.75152499541349e-05	0.00033246263685869	-1125.57521386663	1.17575754205441e-05	3.89698004807332e-06	16.5322514250152	104.747605429403	1.90216421854514	0.0196976119450198	0.000275738276651753	1.72707688390767	8
1219	1	0.000219530246351197	0.000319854835695804	-1124.66810992421	8.29624345475871e-06	2.02147205523833e-06	9.24423122085722	124.463498417013	1.02425571579839	0.0222275600116859	0.000285433601511942	1.27140879935667	8
1220	1	-0.000135693889218338	0.000238615244488246	-738.946177040158	7.35748154977236e-06	2.22675478135452e-06	9.67527914622349	60.3743077926098	1.3545817288628	0.0157276719019137	0.000236061432835634	1.38039353244784	8
1221	1	-2.38647030822812e-05	0.00027289032672107	-890.199439276662	1.17085542826463e-05	4.12615099804399e-06	17.3251481506326	85.0021059203993	2.44081662054121	0.0156951380642454	0.00024265545761453	2.4420753639486	8
1222	1	0.000410318547492941	0.000419462284607134	-1520.28536579829	1.43176019898688e-05	4.27803994047739e-06	18.3803117421441	134.368656973585	1.041206862263	0.0336199721584194	0.00059980391103902	2.34924049622317	8
1223	1	0.000134802667539008	0.000265559788628087	-916.472503078937	7.54150444864207e-06	2.24076714726194e-06	9.78561253034066	116.913124676195	1.30838110081695	0.0170635407473867	0.00022662516139317	1.83898760512048	8
1224	1	-0.000175708044785012	0.000231404282414755	-701.143614275055	8.68875943923773e-06	1.96323781449553e-06	9.09895590428398	52.7901618862211	1.38452095943614	0.0166474811655632	0.000314101740575224	1.44025548969646	8
1225	1	0.000266381285936802	0.000299281775924575	-1073.638159503	5.6267657688582e-06	1.62128197137919e-06	6.97443776639774	131.671273066928	0.620499902378831	0.0229561354489363	0.000225294380865581	1.70408281790793	8
1226	1	3.16023510434431e-05	0.000227686150606828	-756.693017422597	4.88062978275052e-06	1.51007865719821e-06	6.5286923458437	97.902045918402	1.20607672366184	0.0131705151391088	9.39277395401131e-05	1.37805056888153	8
1227	1	-0.000577077422913557	9.81447988949351e-05	-123.502414462562	5.67500020469229e-06	1.8257996910281e-06	7.72335763615711	9.65206312827019	0.199282187280405	0.0335388701814736	0.000321030100206762	1.73056432080849	8
1228	1	-8.31465929761643e-05	0.00023656011675429	-748.671161532879	6.59077214757601e-06	2.1286381633326e-06	9.07280334669585	70.6343494851475	1.42991249129912	0.0143667430057235	0.000170055214705371	1.52145669856287	8
1229	1	0.000404054716854514	0.000394828602256814	-1438.10987978873	1.45889206385444e-05	2.92663048073151e-06	13.908025028098	135.66166599768	1.05565978475585	0.0323683008107594	0.000609223039311354	1.76535866771669	8
1230	1	-0.000182962851849762	0.000140950657971937	-397.533004243103	4.24759460899448e-06	1.17206198484668e-06	5.13974078724749	37.6098851881422	0.683078550759291	0.0132330294539145	0.000197101146399768	1.44983857158833	8
1231	1	0.000127336449901609	0.000290542461553538	-996.397376695154	3.14817740625479e-06	7.22849300697179e-07	3.19868599908293	113.666464282407	0.523424513235565	0.0181754537201471	8.17403059236532e-05	1.27457356951973	8
1232	1	0.00018661266352913	0.000378928956835455	-1312.96026662106	1.12503914477593e-05	3.33767475693775e-06	14.5148896739341	116.219047871649	1.38360408926439	0.0242010359392566	0.000332469518067192	1.96949752090634	8
1233	1	0.000210903612221202	0.000337401815376165	-1183.28976340901	4.53590904371968e-06	1.92174679181721e-06	7.20289333053777	122.008738484167	0.572950471300918	0.0227976949047672	0.000166413929934728	2.17111309930209	8
1234	1	-0.000182150269249498	0.000366406251430552	-1155.60471692983	1.37087857411803e-05	4.98873108591524e-06	20.5601146455408	63.5668101997085	1.74678025771134	0.0234445650580426	0.000433318352258497	2.47292129862411	8
1235	1	7.80725945469192e-05	0.000324148828819608	-1096.23600521088	5.3668650788759e-06	1.36378215082643e-06	5.94030454265471	103.541998774217	0.898298502155626	0.0191034633031961	0.000104668024652127	1.36417456531752	8
1236	1	8.5872961322272e-05	0.000291694352255663	-988.96532272249	5.53022613216661e-06	1.68772095565884e-06	7.14738644762441	106.404093316318	1.00365977557469	0.017422039802085	0.000128888981041388	1.66063188763429	8
1237	1	0.000449733855517557	0.000317237647399341	-1192.16407640299	7.33740746852215e-06	1.5009511260794e-06	6.95941884152065	144.801249561631	0.458442379738589	0.0315335173149833	0.000347092905822598	2.11117021286514	8
1238	1	0.000127489687282754	0.000278819301290152	-959.155636618757	7.77606256201352e-06	2.61175629822993e-06	10.9389910112973	114.572174331304	1.33711272044876	0.0175659756586128	0.000229882721085524	2.05796173202725	8
1239	1	0.000240291492666096	0.00035818986193121	-1262.97108859164	6.23443972436704e-06	1.71229290293729e-06	6.73331470577837	123.855665249078	0.699320686782158	0.0247130157568733	0.000215032912587787	2.48252044678672	8
1240	1	0.000179954899286948	0.000282710558658671	-988.869278280171	7.28294393474593e-06	2.07124255428625e-06	9.18666987933865	122.478141759342	1.06747818964438	0.0192012696286952	0.000245418782635582	1.71598244811323	8
1241	1	-0.000367863923239145	0.000193970409029483	-512.059670773263	7.41230567410363e-06	2.46314617766846e-06	10.5345933317579	27.8021650103675	0.56301459305758	0.0238276308894569	0.000381391871851554	2.22653928073841	8
1242	1	-0.000307889968621505	0.000164654824651527	-434.588176287447	1.08010833500892e-05	3.77367435067358e-06	15.9934787921649	28.1371867957736	0.998429771996738	0.0200049618865421	0.000555164454098897	2.6785881844975	8
1243	1	-0.000110862528131855	0.000207471406249828	-641.353494583311	7.70152640815561e-06	2.30611145011371e-06	10.0412639136115	61.8821421707041	1.67551353375968	0.0134778968539138	0.000238388484752268	2.12335912819806	8
1244	1	0.000214629168070662	0.000282777290189099	-1000.76924392831	6.49881201293646e-06	1.77386458542569e-06	7.95688715856553	127.198653051938	0.853212669342254	0.020340297506209	0.000239232510123164	1.46049326630436	8
1245	1	0.000260432348559958	0.000373377393785602	-1319.56868613594	3.11096393369213e-06	7.91625599062526e-07	3.36625994064012	124.895940249997	0.32616413501663	0.0260828398239425	0.00010854579210152	1.5654486980385	8
1246	1	-0.00018531404030679	0.000297282262331587	-918.234805857601	5.54842068808383e-06	3.67374019218902e-06	13.7069912256295	58.0622135024851	0.833127666851986	0.0200713606666909	0.000245332931232954	3.10716189364678	8
1247	1	0.000217938923504165	0.00031953463117794	-1122.49748065957	9.60368868460066e-06	3.49153193077942e-06	14.3910758593553	124.295983295063	1.21089163953191	0.0221609335489745	0.000351346035688385	2.24726012959137	8
1248	1	-6.34312638086406e-05	0.000304429942344307	-980.695529984258	3.09153050222232e-06	2.05026243144169e-06	7.67576691607887	78.2302032698452	0.562936280058167	0.0178171550679451	0.000120543878964126	1.06828060065332	8
1249	1	0.000133261790743884	0.00038966113436718	-1331.65702001468	1.17873798012507e-05	3.58439220886296e-06	15.5737770783651	108.880382921347	1.56009520326482	0.023595462541266	0.000292441802660213	2.07173896691967	8
1250	1	9.50812619419819e-05	0.000368747298305519	-1249.4161712512	5.22036374366593e-06	7.31252864946934e-07	3.74887973928012	104.458736710213	0.761066080170881	0.0218187114838315	8.49898589146616e-05	1.29270179055316	8
1251	1	-0.000360441245119029	0.000163535664182036	-412.976532420664	8.2554212390655e-06	1.94222786518845e-06	8.87149462304236	24.4042533052904	0.556188857184223	0.02267796979487	0.000433186503353956	1.45921433986904	8
1252	1	0.000267722566344825	0.000294927437259277	-1059.31567875603	7.85996041123217e-06	2.06299494009313e-06	9.13371129691124	132.231829221268	0.860571547454738	0.0228219633084734	0.000315088375845226	1.75155441122679	8
1253	1	-0.000453493666979991	0.000205286323363555	-524.986899543689	5.07325853466266e-06	2.54635662890949e-06	9.82977110567093	24.3551869548434	0.359552558815374	0.0285214994647163	0.000271556996888318	2.64074245227629	8
1254	1	-0.000190365040064591	0.000191421012474616	-563.281807503163	6.39845216670297e-06	2.35230783888343e-06	9.66182147697042	45.1584725468406	1.02521991362278	0.0154678283412863	0.000275609004219205	2.64668129074379	8
1255	1	3.25638278716174e-05	0.000244322603990094	-812.824840037109	5.08238396491544e-06	1.44807819976897e-06	6.36666912504356	97.591758739892	1.17190455407094	0.0141224432683202	9.07949124618686e-05	1.27354065014114	8
1256	1	-0.000342228564194318	0.000238545374600921	-671.675081023994	6.8876562764412e-06	2.70441407842674e-06	11.0945719539595	34.8778563981404	0.620869692196538	0.0239016309886324	0.000335652946155522	2.49446183395146	8
1257	1	-0.000221815463759356	0.00020811070779247	-607.568368181099	1.00260728627734e-05	2.90223041172254e-06	12.8520295802689	43.1742007738176	1.35236535878636	0.0174269764985127	0.000434109194343872	1.83136361741437	8
1258	1	-0.00043668790834952	0.00024396784418129	-659.934917029117	5.81255438029689e-06	2.06554994557393e-06	8.46957438173915	29.1911233674541	0.384840489405607	0.0286602971316938	0.000296412893996972	2.67100360465355	8
1259	1	-0.000542561873637967	0.000157550707126588	-333.830562213	7.65154482164003e-06	2.22726429157567e-06	9.8139633705629	16.1923952330459	0.30639142690344	0.0323706218491395	0.000422511354249817	1.72509237086749	8
1260	1	-0.000258606097967065	0.000316659676030778	-963.130513967314	4.17712655364639e-06	2.32310767484472e-06	8.68488351137788	50.7625573530871	0.497979045695899	0.023424827532466	0.000183155431273078	1.63222717148889	8
1261	1	-7.53563239602446e-05	0.000293958953947177	-946.34255659582	3.82471312403931e-06	1.68446733416473e-06	6.2472326861691	75.6218547668542	0.70395358489194	0.0173872099605035	0.000108173738647771	1.40607048887278	8
1262	1	9.74637344301435e-05	0.000285638683077557	-969.900932799792	7.58908866114608e-06	2.3179954417225e-06	10.0597994528716	108.840326703085	1.37091633217297	0.0172923780129679	0.000188458575025938	1.71351620718709	8
1263	1	-0.000254101172048467	0.000132753867574463	-345.664478904354	6.44316170871299e-06	1.95978705747483e-06	8.50683146879149	27.5845887554192	0.68996517813934	0.0164261104662842	0.000331307716491334	1.90419621667332	8
1264	1	-0.000198848100075366	0.000292067173733195	-899.843954448379	2.75965004369845e-06	1.0333314619805e-06	4.05387284164267	55.751790785172	0.381737865070394	0.0202444557486103	0.000101554635921367	1.16214386998282	8
1265	1	-0.000399170453576566	0.00015621477846838	-376.297258039568	8.45812599864749e-06	1.79731538086957e-06	8.16980292739316	21.3728185707653	0.468836526920211	0.0245597866336311	0.000452845059788343	2.03816064602925	8
1266	1	-0.000265834125477639	0.000266424961882878	-790.536527648684	5.11099763004267e-06	1.50241452917329e-06	6.42150202137911	45.0636013913191	0.573993568388972	0.0215640815987399	0.000215627683106409	1.91935955001952	8
1267	1	0.000224223373170438	0.000367831397948553	-1289.96894554378	4.8032366239196e-06	2.17336901859991e-06	8.44535822810907	121.365730123227	0.565855427395257	0.0246821835891069	0.000178393637058761	2.12099732799263	8
1268	1	-0.000544590404885306	0.000106251105686905	-161.738360923999	5.65510174248579e-06	1.36541290756159e-06	6.14570890217252	11.0398824110895	0.17791882110308	0.0317910496928846	0.000318369870819498	1.40946752036945	8
1269	1	-7.33186311368123e-05	0.000317295446473762	-1024.4994243998	8.142587184412e-06	1.68349834143915e-06	7.82024569734539	76.9888218387921	1.39741370829593	0.0186587305785793	0.000140943460207695	1.50977673359976	8
1270	1	0.000369848835956408	0.000324620544963126	-1191.67162621592	1.22049154826024e-05	3.3309772997934e-06	14.587081745655	138.7262056561	0.981658666893205	0.0281954982161778	0.000540431163332831	2.18078862041184	8
1271	1	0.000240719028307069	0.000291219509874269	-1037.57755260382	4.79692937705276e-06	1.28070710057113e-06	5.69725743134768	129.576782744417	0.574173239589789	0.0216479833414098	0.000184013699423399	1.31915149949814	8
1272	1	-0.000157880588697623	0.000282344202530853	-879.432747336594	2.13975814987848e-05	4.23556672856566e-06	20.8864826500672	60.7870517316504	3.32808115694733	0.0185345002753934	0.000634737703768146	1.34556707833827	8
1273	1	0.000113932277966427	0.000371564919249419	-1265.05033369613	4.10082670180159e-06	8.9611187599455e-07	3.80417409342925	107.047015806384	0.579303918330084	0.0222674309130184	8.45816279935976e-05	1.15981776214009	8
1274	1	0.0001830602507026	0.00036581889686958	-1267.93307898722	4.22900225905073e-06	1.45722106273145e-06	6.05608449206033	116.583943385771	0.537530786862482	0.0234377210116179	0.000131653725078921	1.08301112603272	8
1275	1	-5.67722926483235e-05	0.000214214124261232	-684.519821023603	1.12971575590546e-05	1.56402638811824e-06	7.57473698150477	75.1563859702173	2.82523898213752	0.0126972906639082	0.000187082720318978	1.67463099077302	8
1276	1	0.000201332342917184	0.000246446427528416	-873.540472256404	7.25695853123617e-06	1.84938670669355e-06	8.44385363678376	129.246816348797	1.03354730951536	0.0182332552105606	0.000275558713387848	1.28186270287891	8
1277	1	8.38773463408195e-05	0.000158346172684341	-542.421152498844	1.92163730276678e-05	3.11714460918335e-06	15.4379678981849	117.910558339361	5.44970865160672	0.0102668087675397	0.000539001893408552	2.2119461563807	8
1278	1	-0.000219914853118384	0.000212769454942493	-622.628604334618	4.43387491734474e-06	1.63314885167175e-06	6.6209843061561	44.05389694025	0.617696545658302	0.0175322630357755	0.000193823596969518	2.90827245423458	8
1279	1	0.000193768162070204	0.000330121094118009	-1151.60337249396	2.62234223085898e-06	1.25383032552787e-06	4.7128132652731	120.411266237445	0.351587401997802	0.0219320896943884	9.80971190100984e-05	1.25418482496872	8
1280	1	-4.73267755189934e-05	0.000275071375882154	-888.929303189975	1.2892154974151e-05	3.22025043385319e-06	14.6814449580965	80.2376855051738	2.61056194183161	0.0159919984160979	0.000220797041084651	1.793625677612	8
1281	1	0.000390989528156489	0.000325563524069451	-1201.49982437551	1.69287537576892e-05	3.4750956322832e-06	16.808984025766	140.217015511712	1.25638613451052	0.0291513569515587	0.000756187989043226	2.03578923560634	8
1282	1	3.99102339547475e-05	0.000222535072522103	-741.373076346842	6.91944432238351e-06	2.03839730187511e-06	8.96483441565524	100.167539130587	1.7284304433696	0.0129537488243727	0.000134584986987141	1.5520435718018	8
1283	1	0.000479821548339296	0.00034409642737209	-1292.55486434701	9.53185826110579e-06	1.36225646816538e-06	6.76379326921263	144.354399930061	0.549631450863444	0.0338302826274059	0.000446134515841207	1.22163858770593	8
1284	1	-0.00044728153364408	0.000156091370377319	-360.474957643781	8.17629909392125e-06	2.86212618269901e-06	11.9282029397672	19.2378585469898	0.461497732054093	0.0271430404659725	0.000445595661280458	2.64054488016208	8
1285	1	0.00038795888718006	0.000432069398182444	-1555.15449173473	8.89206203326001e-06	2.96023181514995e-06	12.3960861539249	131.920944388556	0.681366091354194	0.0332708450185351	0.000363026092080068	2.25869092481441	8
1286	1	-5.00111636103313e-05	0.000222144765580331	-710.746944356447	1.17843197512945e-05	3.15709829518161e-06	14.2670236773085	77.3125977290057	2.89806335019224	0.0130465159267033	0.000230506398796142	1.36193339848778	8
1287	1	-0.000320115348229689	0.000115139967552395	-265.388579604011	5.8111155183893e-06	1.84494428644348e-06	7.80829229478435	19.7827829220861	0.441836752819631	0.0194916030737886	0.000315338502307083	1.8661551556259	8
1288	1	3.44298444663538e-05	0.000331208081045655	-1104.57371989914	7.79175891627392e-06	2.1147784362266e-06	8.67340894705196	95.9347127772115	1.33401942661018	0.0190790815317428	0.000129055680399362	2.35149653247187	8
1289	1	5.4222948390798e-05	0.000308612763291486	-1034.87499100287	4.27034110799898e-06	1.57321136965555e-06	6.15716988904993	99.96509956965	0.77068206128794	0.0179530598969677	9.83580522884688e-05	2.23203285173416	8
1290	1	0.000204294493849548	0.000272314812037899	-962.650986987275	7.51220768291979e-06	1.92768660818257e-06	8.06024219179854	126.877758805214	1.02993906680982	0.0195051183377473	0.000272989817995951	1.81986737207395	8
1291	1	-0.000180877223559157	0.000379949413793357	-1197.71892618265	3.10185074540387e-06	1.69420565029822e-06	6.35449236867714	64.5429328589955	0.394013016587658	0.0241104361478506	0.000116264675106089	1.92889652730631	8
1292	1	-0.00017584459282739	0.000231516161556225	-701.605508553092	1.17868405746969e-05	4.41293112422465e-06	18.4047090832664	52.7820633036489	1.92318899577599	0.0166573178000817	0.000455405227250135	2.06518502506994	8
1293	1	0.000390445351001391	0.000295205906599323	-1101.12703542515	7.80140380156789e-06	2.46341653629995e-06	9.47170741167691	142.907990976848	0.596837847784901	0.0280453366067945	0.000366568016521571	1.42714040802098	8
1294	1	0.000185154562991745	0.000326045717829345	-1137.19107452788	4.52258858112044e-06	1.13484371380893e-06	5.14163846306494	119.59133929011	0.607022750733188	0.0214830912183288	0.000139893934776759	1.37154256830676	8
1295	1	-0.000476955027283853	0.000177283475894993	-422.060806305329	6.59653076128672e-06	2.74631433288512e-06	11.077087857637	20.3900256206991	0.388578017831727	0.0291542346091376	0.000358488501702965	2.72020313939611	8
1296	1	-7.28961902409439e-07	0.000264063716436276	-867.735084323259	7.83870663138938e-06	2.34063512469091e-06	10.2291347977516	89.8418323618928	1.70080745232671	0.015129793747974	0.000134113724876929	2.3534525019716	8
1297	1	-0.000360257347270252	0.000119956969252869	-268.613309788897	1.19197924179613e-05	1.58308894481321e-06	7.94521346450903	18.4165088984379	0.611766491428418	0.0217554283178458	0.000648609550074792	1.60442351927543	8
1298	1	0.000237050788446143	0.000308618158799929	-1094.40409316652	5.66256251609366e-06	1.61018813452253e-06	7.10927349938496	127.528004207526	0.676770052996196	0.0222966898664936	0.000210741215759139	1.6246290752482	8
1299	1	3.91275313127137e-05	0.000198026320089229	-660.412256509996	9.91600521716044e-06	3.06134708995007e-06	13.2241967717764	101.176962953743	2.76637068083097	0.0115654317459075	0.000204299785287856	2.02453999163054	8
1300	1	-0.000481208749392344	0.000144337346701619	-308.2537956768	9.23433159448741e-06	3.77551392828947e-06	15.5169977314782	16.6964829339361	0.511515286427	0.0287847910641688	0.000510578444884561	1.70759929721763	8
1301	1	-0.000248221216916006	0.000257121272338318	-765.55417755622	4.61480508151861e-06	1.4232625569912e-06	6.07310917538889	46.0089848169124	0.555368525134427	0.0204767380977842	0.000192787812013727	1.97751041227023	8
1302	1	-0.00011009926330364	0.000303340014920268	-964.253212173461	6.78980344049877e-06	1.97581829999761e-06	8.60876603943193	70.0512994749143	1.13949755638143	0.0184895003211807	0.000170119023085023	2.01154327861574	8
1303	1	0.000166330352071567	0.000336001734804599	-1163.86351577725	6.27095007846923e-06	1.69756830264767e-06	7.59171699064857	116.336710225395	0.866545691098665	0.0214811756442543	0.000181678311440713	1.79022244374558	8
1304	1	-0.000186446078521972	0.000195530015703628	-578.010590820633	4.29071724211285e-06	1.44505653649892e-06	6.03975981719218	46.3623187011208	0.691658313200508	0.0154798440747754	0.000179924050341072	1.55201128747815	8
1305	1	0.000160891424858719	0.000256680863512485	-896.698933315993	1.10434836190085e-05	3.27058751530636e-06	13.8486279056107	122.080104369231	1.8000024676419	0.0173570384889388	0.000371675013341039	1.89051664685589	8
1306	1	-5.59342969795074e-05	0.000225247088615776	-718.669219127648	8.27466802489626e-06	2.54137088054822e-06	11.0972356421199	76.0541618177459	1.98831861450013	0.0132976696150138	0.00018173147455169	1.60121099374807	8
1307	1	-6.58896817142702e-05	0.000221205520382009	-704.014460834173	6.11742055632299e-06	2.31001776219572e-06	9.50692358930703	73.4129765174439	1.46455956791341	0.0132244480949453	0.000161560350339069	1.8924476152167	8
1308	1	-8.08784345462253e-05	0.000284526073265599	-908.272604567765	4.15077378914429e-06	1.15316917819522e-06	4.94670687251128	74.1318459048401	0.77577111573004	0.0169479717329182	9.09259564165011e-05	1.77010037563077	8
1309	1	0.000179481369064655	0.000287495295098063	-1005.21234569781	5.15491985659034e-06	1.36354406936071e-06	6.13167394410303	121.976254386283	0.749241346781051	0.0194187136067114	0.000169870914140823	0.885317385576637	8
1310	1	6.77485859394965e-05	0.000281781602170767	-949.061504669893	5.33112737527354e-06	1.52206977564342e-06	6.71538701078441	103.518994725033	1.02717325619882	0.0166049789762042	0.00011085248549454	1.1146882907196	8
1311	1	0.000538844411958182	0.000380451545877385	-1432.34764037394	2.37678017355568e-05	7.89729476370626e-06	33.5266759900988	144.77596465081	1.3160303163381	0.0377933555852508	0.00114265650329845	1.82112053177993	8
1312	1	0.000225439241193152	0.000354622913090845	-1244.78867036672	8.74759630194581e-06	2.28631451585343e-06	10.3336347137061	122.444748054418	1.02035086626736	0.0240765183641543	0.000290725369681036	1.87180737308002	8
1313	1	0.000458738581760192	0.000384712933732205	-1422.6671657371	5.07856787865071e-06	8.36846285291949e-07	4.06021310682569	140.015720745871	0.318275799583004	0.0343031436052001	0.000225073986033382	1.64038560430307	8
1314	1	-4.00905347647262e-05	0.000228690132812724	-737.864648132168	6.65686920061342e-06	1.94122461252574e-06	7.79528105217005	80.0567967532178	1.6201912195824	0.0133027950504072	0.000127825348236628	2.18683377004843	8
1315	1	0.000322169131888234	0.000344346459125702	-1241.87942868203	3.98224410102517e-06	1.19359637926649e-06	4.6122671369066	133.09427018724	0.366955101237617	0.0270183107179491	0.000163686942521068	1.73431100009421	8
1316	1	0.000398554522096742	0.000286358023028817	-1073.86166256585	7.90133656663478e-06	2.47482785983039e-06	9.10559410036918	144.303076951546	0.587182109085291	0.0281185472650805	0.000376849930780844	1.70711707331622	8
1317	1	-0.00060773097072735	9.56209154911033e-05	-104.913751804764	4.33011227760675e-06	1.68879332539849e-06	6.87726152121351	8.94166127355209	0.16753707334325	0.0352487899513108	0.000245542978806497	1.84118696320585	8
1318	1	0.0001250293672809	0.000343093586193623	-1173.06005724885	4.03509837225842e-06	1.08139130652518e-06	4.46758382587565	110.022634355901	0.597684726083395	0.0209224182231367	9.82599309631641e-05	1.52078412200883	8
1319	1	0.000467000901508394	0.00030657559471549	-1163.11852658136	5.98768265331091e-06	2.01957354638911e-06	8.1740847760419	146.716001067938	0.378899812713567	0.0320077000507979	0.000293738306829396	1.42244264387657	8
1320	1	-4.43896120625192e-05	0.000225782366468204	-726.86984306527	9.05562981904735e-06	2.26367745716431e-06	8.81795921076796	78.877307368789	2.21515775592585	0.0131840206653067	0.00016190790658249	2.25362845427741	8
1321	1	-5.34812198390192e-05	0.000348923518786728	-1133.18967496779	1.11765719165245e-05	3.58359788088531e-06	15.414755202579	81.2858137574259	1.79531177622206	0.0202253170553206	0.000224952160218584	2.54188017813459	8
1322	1	-4.28842458882013e-05	0.000238544916137695	-768.834542172966	5.42306222097558e-06	2.18720474205953e-06	8.90050485845233	79.8085524589816	1.2650910668731	0.0138867209061289	0.000135038529395489	1.32428638084044	8
1323	1	0.000132939880478557	0.000217629122358151	-758.069210093875	8.08202325804661e-06	2.54626516429386e-06	9.38917384624393	121.418888576841	1.57799955563114	0.014611597061986	0.00027160684188918	1.86190520442473	8
1324	1	-0.000214311219257345	0.000229818853522406	-684.587777107991	5.54986099593372e-06	1.61531940959394e-06	7.04637131424019	46.99977713768	0.766841485730488	0.0180045546380541	0.000227182905981398	2.07931073850157	8
1325	1	-0.000382389589525967	0.000144500622064464	-343.114210552647	5.27842682020703e-06	1.52947358821321e-06	6.62322468374755	20.7010013118719	0.329559903436146	0.02342144730261	0.000284596801689419	1.9271923851345	8
1326	1	-0.000524356990287102	0.000145661858138057	-300.737983320844	5.06495291051399e-06	1.89050307190513e-06	7.69595900018333	15.5248351450616	0.23905697856327	0.0311810965905011	0.000281111254730819	2.24659257842436	8
1327	1	6.22106176831755e-05	0.000171289048109594	-579.244332083254	6.14409964759071e-06	1.5578643719803e-06	6.5832618198425	109.960559189587	1.8233667238067	0.0104413754671384	0.000146562250543285	1.88218796788548	8
1328	1	0.000173409834033038	0.000295424224556391	-1028.09322363434	2.49928041320478e-06	8.56241777439525e-07	3.45905753022623	120.412330258851	0.367724399738292	0.0196271653198323	8.39332292610169e-05	1.16735762762253	8
1329	1	0.000256417652929903	0.000359641206654234	-1272.13113103909	3.60619909308226e-06	1.65673991042306e-06	6.20705796878552	125.48817985308	0.400805586805876	0.0253070849896631	0.000142695021625135	1.82923345348927	8
1330	1	-0.00037918627040799	0.000189741773209147	-498.593563585656	9.56855541193608e-06	2.67722551209853e-06	11.9425002507967	26.5830159519271	0.662910280978147	0.0242939609311179	0.000495063750123517	1.69111544236734	8
1331	1	5.8338493364919e-05	0.000328500534790911	-1103.66617909505	5.08853771575762e-06	1.51861783713518e-06	6.40880416930277	100.070182492171	0.861595258940196	0.0191161916477824	9.96905392582712e-05	1.46874034523587	8
1332	1	-0.000617366346045189	0.000122677142568497	-192.427523611622	5.15709095926603e-06	2.25534325490815e-06	9.03912643149198	11.2388707089966	0.221171589708238	0.0360640765134121	0.000290905330326207	1.95079596454128	8
1333	1	-0.000197000080221986	0.000231580932112617	-696.572361945317	6.31716457272901e-06	1.49604332918863e-06	6.66545638421537	49.6130224684333	0.92498012600081	0.0174200610997275	0.000243440769460458	1.96140362454858	8
1334	1	0.00041009248806069	0.00040341571544927	-1467.67392611562	1.2540194394587e-05	2.58084321578401e-06	12.2565251819895	135.470237792826	0.894867853346756	0.0329597683014242	0.000522600555779082	1.6853107840916	8
1335	1	-0.000328578745188244	0.000275338140898653	-800.495941090751	5.1059412021805e-06	2.22569055537312e-06	8.78864941013185	39.9618963558974	0.494062877972463	0.0245621240437686	0.000238720979325294	2.54967429438565	8
1336	1	0.000312339125121743	0.000389613026436747	-1390.10637120038	7.01395201231913e-06	1.78055797603055e-06	7.99191749726556	128.717930064864	0.640788475919382	0.0286108526123314	0.000263666220461461	1.92562945393683	8
1337	1	0.00019115547105199	0.000305160969784393	-1066.6505953927	3.17428901906662e-06	9.92476912546233e-07	4.04579097088682	122.063384894597	0.436167797590504	0.0206315427504649	0.000107907377938396	1.50933111904252	8
1338	1	-0.000117092913125926	0.000214203975172295	-664.216226355963	5.84772134416604e-06	1.90070512783612e-06	7.88527281353089	61.3371261319354	1.22315860727339	0.0139869889488864	0.000186971459650293	2.03177578215474	8
1339	1	0.000184455013283481	0.000322140193500591	-1123.77384434086	6.02406677017093e-06	1.47694682858317e-06	6.79725116542111	119.795122640335	0.814802680613456	0.0212688495999203	0.000186567649702008	1.57253142366452	8
1340	1	3.73627639573115e-05	0.000313340327901341	-1045.87073521423	6.82843255983792e-06	1.72871911304547e-06	7.60419987891243	96.7998543172288	1.23166824544685	0.0180802577235966	0.000108714725002274	1.56476507820845	8
1341	1	9.20681918186944e-05	0.000355713522471217	-1204.78750616537	3.15327138470212e-06	8.02223198781842e-07	3.50166826966445	104.511234987056	0.477048168129279	0.0210524880603771	6.34778485387427e-05	1.61534641871382	8
1342	1	-0.00028524197082534	0.000349720152334909	-1065.31011340425	9.36560479545832e-06	4.96237052552671e-06	19.0377390452639	50.7983102787876	1.00378385799815	0.025857296419332	0.000404447711886041	3.03159139752483	8
1343	1	7.60661149056238e-05	0.000341946175123285	-1153.54741535213	5.85589942300804e-06	1.98489569291172e-06	8.28436918507937	102.541273719013	0.937591416596151	0.0200709684040987	0.000132784440298635	1.24479772550165	8
1344	1	9.33511921179788e-05	0.000286355154873096	-972.65960868716	9.61882100242168e-06	1.73070287195368e-06	7.97971849121418	108.055862020524	1.74269880804224	0.0172567539665067	0.000195106336344592	2.48587130120379	8
1345	1	-0.000133688375308799	0.000142479424107553	-418.326886617503	4.09150669945741e-06	1.21906448545223e-06	5.17439412486135	46.8232392388566	0.908538207024905	0.0111943940509036	0.000168299310552495	1.53927124627584	8
1346	1	0.000409536170024557	0.000318465174477822	-1183.76192764893	9.32575564797838e-06	2.62107075381157e-06	11.5840906045788	142.130504849059	0.672281440210179	0.0297243023719886	0.000431759708271049	1.9878465879549	8
1347	1	0.00030302278859684	0.00032289741089205	-1163.57919869414	1.40507978615239e-05	3.53057604347179e-06	15.9885519549849	133.181318468765	1.36205055801305	0.0253714563910421	0.000570309918643364	2.61644323315683	8
1348	1	-0.00038763555499106	0.000219987094121193	-595.028217637349	5.76560199442451e-06	2.74689561172761e-06	10.7636606411392	29.5753483855616	0.477635459489939	0.0255371871226941	0.000297619441757137	2.72279215841326	8
1349	1	0.000327791931171829	0.000349296218918872	-1260.93274521717	4.76895930498002e-06	1.21750956076063e-06	5.43560869378964	133.180900216335	0.427721768299474	0.0274455374106708	0.00019377572693538	1.32414279404859	8
1350	1	-8.22140591080553e-05	0.000306362828464327	-981.633925085804	1.00112490267747e-05	3.85827305121938e-06	15.8732642490864	74.9782978020894	1.75583813260531	0.0181743556077549	0.000260169892554762	1.42529451793185	8
1351	1	-0.000377555385585984	0.000176750261992969	-450.363443453567	6.13188341589889e-06	1.95085631264301e-06	8.4246340613409	25.0863585517814	0.432023011422762	0.0238854487419644	0.000321699702343891	1.66384817862338	8
1352	1	-2.41204693686071e-05	0.000250250502622013	-812.341441928863	1.65246092265986e-05	3.16065461272713e-06	15.4601852486455	84.4945359806873	3.74918298199084	0.0144047456521719	0.00020185052734892	1.54582022135736	8
1353	1	-0.000366367339242938	0.000223134403541669	-610.380707762578	5.91890745314445e-06	2.56220269579566e-06	10.3262535396625	31.3433191540104	0.504514655318095	0.0245780841196108	0.000299535107300575	1.94886135670348	8
1354	1	-0.000333378311584104	0.000228900734872395	-643.708725245219	4.51084808298697e-06	1.20966338867755e-06	5.2808268826026	34.4738646419444	0.388366312462623	0.0231702196527124	0.000216645845978113	1.82265195402793	8
1355	1	-0.000364716797267021	0.000136915235840343	-323.414357028152	4.64682391292584e-06	1.54437464331561e-06	6.37140511299068	20.5762110941672	0.320799455297836	0.0223206670868308	0.000251191028949057	1.67288876606114	8
1356	1	-0.00031865120622215	0.000202752430427319	-558.449825759251	8.90190541855662e-06	2.65233313186544e-06	11.5936042740949	32.4679146064309	0.800496524905023	0.0216398449552173	0.000437982853496987	3.00614482553476	8
1357	1	-0.000189865613027783	0.000229011078073595	-689.680118497926	5.87612872857308e-06	1.74096724597331e-06	7.55828437934509	50.3389806196502	0.897167167336319	0.0170444129270493	0.000228191341908565	2.18475359457586	8
1358	1	-0.000481439973463726	0.00023019384488284	-599.142118751654	1.06247621976677e-05	3.71935907943573e-06	15.4366673935654	25.5541482068014	0.609869015048916	0.0305754244913601	0.000556844373070179	2.88718807641129	8
1359	1	0.0001093097702635	0.000343529112303388	-1166.81479571099	1.00560243010748e-05	3.3012719815651e-06	14.2161015375391	107.650889464001	1.53128672580143	0.0206551774422792	0.000251016432878353	1.44106019882524	8
1360	1	-0.000150928930104104	0.000171854815208983	-512.085037521824	4.99079944895543e-06	1.74414186896898e-06	7.05992288777061	48.7092618442033	0.982624948177387	0.013104788295351	0.000203084429211512	1.640588385834	8
1361	1	-0.000714883802711483	5.04215183439311e-05	81.1937821497535	1.13667362099397e-05	3.91680375266477e-06	16.6527927882362	4.03445142221472	0.318842348452038	0.0410615713383891	0.000649843632777328	2.65571325310897	8
1362	1	-0.000122892313372019	0.000217126450652397	-670.241802402995	1.14334723434745e-05	3.72095749901625e-06	15.9514214039717	60.4903902929623	2.32351037413067	0.0142948564653409	0.000372216244249807	2.42987489327663	8
1363	1	8.64084305037483e-05	0.000251598908025032	-853.901794825059	6.01360712053745e-06	1.65035215309904e-06	7.40908958614519	108.954379324846	1.23040297682324	0.0152420153641231	0.000143259219525582	1.18660855474104	8
1364	1	-0.00016419190836891	0.000251171117502532	-773.115606842116	3.45929287131458e-06	9.42387648077817e-07	4.16819778782131	56.8271392976044	0.561558856414859	0.0171931171294659	0.000117490391071314	1.36740231688225	8
1365	1	-3.61814331127589e-05	0.000204803184864065	-657.606843549109	5.41943872538852e-06	1.61092617287511e-06	7.07768994490447	79.9812509697389	1.47228193538205	0.0119160675096168	0.000105732903981848	1.46714454386812	8
1366	1	0.000131535128384191	0.000185947726748416	-651.484596401839	7.16643960724885e-06	1.30547695221782e-06	6.25285321763669	125.274706532677	1.48391630630478	0.013050117861269	0.000244860830369258	1.59921219705715	8
1367	1	-0.000572747551780363	0.000199118161259889	-466.090885084044	7.89831951454799e-06	2.38475515446188e-06	10.431551127336	19.1702282451826	0.324590917109839	0.0347425898564495	0.000429793956620076	2.15232769830274	8
1368	1	-0.000346893100271538	0.00015133432502428	-377.343637717152	5.82945298007005e-06	1.81298154393527e-06	7.75971458023715	23.569543206156	0.433375755027483	0.0216845328003217	0.00030894384845999	2.07754845559652	8
1369	1	-0.000440098172126527	8.57996717856257e-05	-128.335003407889	8.40449329436857e-06	2.63107507506052e-06	11.4093021673649	11.0317668410971	0.388751498560721	0.0256904945995302	0.000473523059995395	1.74294265138848	8
1370	1	0.000270486432920073	0.000312042985755904	-1116.13893827109	3.86700334027083e-06	1.3163256700345e-06	5.2079959132227	130.919539503375	0.422696742427462	0.0236607093265491	0.000155912183138859	1.95367088164185	8
1371	1	0.000245993241349737	0.000221896076450855	-808.302821241368	8.06658256359504e-06	2.16064283070672e-06	9.64070041130643	137.948233742891	0.974774281950759	0.0189813001503012	0.000353062947219	1.52289581628022	8
1372	1	-3.60075169529228e-05	0.000304284455030215	-991.549824532408	5.18454566732747e-06	1.51852227949691e-06	6.60281174027999	83.2512853147113	0.963329703757288	0.0175558573923524	9.31874251582916e-05	1.523333948196	8
1373	1	-0.000428896592527182	0.000127507508907551	-269.673254749559	7.19212540553209e-06	2.61088932213431e-06	10.9721058425777	16.5567904385152	0.414210671590687	0.0256369275793418	0.000397286312715395	1.82790559837054	8
1374	1	-0.000241854945763246	0.000174365082666124	-489.503569803101	5.39875228530285e-06	1.73827923052239e-06	7.40447360421229	35.7896812188184	0.664477528460862	0.0170830796124903	0.00025758695629063	1.49828638288909	8
1375	1	-0.000155039620766604	0.000394799450584616	-1255.9549118818	3.49927651295354e-06	2.22646739464972e-06	8.37404715690699	68.5598279670533	0.45351064635589	0.0243020485126237	0.000139534790124538	1.90470134802407	8
1376	1	-6.47310615223682e-05	0.000276209319303549	-889.072070393537	7.48614681724456e-06	2.07405337754114e-06	9.2648539405468	76.8104703286478	1.47514827495315	0.0162544091359109	0.000151541291135325	1.81840055484551	8
1377	1	-3.7185741795388e-05	0.000247042071148506	-801.498768605984	4.87617808098078e-06	1.97462766367767e-06	7.80343999258802	81.4398786049716	1.10791491344274	0.0143139216508814	0.000119356327137137	1.68832159521428	8
1378	1	0.000458856449121213	0.000420805300314366	-1540.67556762238	1.18214591521474e-05	3.5057954343879e-06	14.9818687562011	137.476874734778	0.772785519655069	0.0356721444090908	0.000517320007703937	2.17023239046285	8
1379	1	0.000177181170832398	0.000362360191793009	-1254.62239893499	5.81832773625233e-06	9.61729337255832e-07	4.68590682925195	116.05697904416	0.744890999435339	0.0231107381608524	0.000154576510147627	1.84876180119092	8
1380	1	0.000412482029020829	0.00035210579573138	-1297.27306311696	6.83320941323612e-06	1.03952508065709e-06	4.940560535149	139.515033799243	0.476086102711879	0.031073115999618	0.000300276576043133	1.77027125477658	8
1381	1	-3.34602540349684e-05	0.000323157057557275	-1055.32507030417	1.58686509868621e-05	4.7729632696636e-06	20.8260320055146	84.0885587827748	2.78501962232156	0.0186145218435172	0.000287682823767747	2.51745999755429	8
1382	1	0.000112678572514293	0.000274873713917743	-939.77677488706	9.024511916799e-06	2.5554920996147e-06	11.4127788882655	112.290122552715	1.62129245625739	0.0170209950249216	0.00023836503325808	1.14376175598071	8
1383	1	0.000244837842311709	0.000321598039398766	-1140.67707722976	7.01249201235395e-06	2.64898492714921e-06	10.435203507674	127.282610929444	0.822980123322689	0.0231584728424252	0.00027169374573499	1.42516035308799	8
1384	1	0.000117493688502735	0.000261795183098593	-898.966155943927	1.02765621040185e-05	3.04102211562597e-06	13.1298883739068	114.170544869369	1.88847003574371	0.0164411415074994	0.000288777575823147	2.02797753688254	8
1385	1	-0.000425912787986501	0.000255371382663525	-702.207142299181	4.68607954730488e-06	1.98442243808562e-06	7.89875073140265	30.9463155740197	0.340375196651789	0.0284533521029005	0.000237579280611076	2.18355686942322	8
1386	1	-0.000345983302127043	0.000197910036025703	-532.351816396911	9.70749122922631e-06	3.04954307081707e-06	13.2330171903496	29.7705031845848	0.790471955709488	0.0228374401550013	0.000490524786808062	2.02981405952854	8
1387	1	8.03933200825788e-05	0.0003192714466633	-1080.36124543662	4.91792335935038e-06	1.37669914197589e-06	6.07923806756549	104.133397985594	0.831997613676174	0.0188639194987843	0.000102883172198167	1.38303377783109	8
1388	1	-0.000406120601742979	0.000115679806157933	-238.393883968106	4.98976870594373e-06	1.34208388188188e-06	5.89222603425088	15.8991269449965	0.255088587591028	0.024194545705825	0.000275761703122519	1.58395412670647	8
1389	1	0.0001025179082388	0.000497335317726709	-1686.83613089436	6.70614391797959e-06	3.67508571585751e-06	14.1425535027219	101.647486301502	0.745808355911236	0.0290943147766143	0.000220337764660748	1.65461725927236	8
1390	1	-2.6281150384743e-05	0.000254044689924476	-827.006081330121	5.71807966532036e-06	1.40895990600894e-06	6.36395071582381	84.0937104448933	1.27638179597311	0.0146333690594815	8.70888710775222e-05	2.2140898926194	8
1391	1	-0.000222647389147153	0.000143324579379022	-391.841459038709	1.28274449051177e-05	2.30472305790015e-06	11.0574731707976	32.7705582546807	1.55980288359379	0.0151713546233054	0.000622105700558334	1.57653901699513	8
1392	1	0.000136655999404361	0.000221933073620687	-774.526527962897	4.94721005876791e-06	1.27808639369198e-06	4.68007110799063	121.622817160967	0.937724888701914	0.0149331255919094	0.000161173166261666	1.30971729502651	8
1393	1	0.000354041716041175	0.000297497868688817	-1095.70636063563	6.77730882682155e-06	1.45718188189223e-06	6.40233837230816	139.959985510602	0.557602143451529	0.0264958438255292	0.000302102217468903	2.46993835983428	8
1394	1	9.26684079712943e-05	0.000291798576669069	-991.542443964329	7.35816288459231e-06	2.44873548286646e-06	10.0849977124023	107.618631605567	1.31974735896207	0.0175416657335461	0.000184837523078637	2.24060890488667	8
1395	1	-0.000551395366463401	0.000109422679682242	-170.240048335875	6.17232992126166e-06	1.26612294297637e-06	6.07534171034187	11.2243412946066	0.176117842062822	0.0322086942185535	0.0003471712385912	1.4252850945338	8
1396	1	-0.000268569864627243	0.00015252720938551	-406.805712582173	1.0000267366662e-05	2.95610789523902e-06	12.9936710474936	29.5932725591063	1.03280360230457	0.0176963574189983	0.000505202591002173	1.72421073462792	8
1397	1	-0.000547476057416395	0.000201257020421302	-481.454141892743	8.03961719242965e-06	2.833927312969e-06	11.7462443545344	20.1838722886802	0.37750334862304	0.0334204049366917	0.000435963092002033	2.35977566746756	8
1398	1	-0.000110206917878245	0.000300188404427042	-951.820467552401	4.36028992111268e-06	2.47831676167544e-06	9.29699271271326	69.8405095761104	0.749181329310655	0.0183219894888964	0.000158686240469277	2.6314760081218	8
1399	1	-6.28881854985757e-06	0.000210427037533947	-687.690668649631	5.70737053565346e-06	1.48958376250899e-06	6.43681735948213	88.2881689255113	1.55268245161015	0.0120619640446478	8.58662435624011e-05	1.92872382171345	8
1400	1	0.000295821314241817	0.000369643249293248	-1315.52827102327	1.3734912765654e-05	4.56448818792385e-06	19.339876905418	128.669892873865	1.34288956441208	0.0271261691900975	0.000532423752748792	2.52680492234983	8
1401	1	0.000108445374396757	0.000348884299545082	-1186.94715905848	4.23236550904285e-06	9.09167600795329e-07	3.82111702172026	107.267061823832	0.635235676560421	0.0209330145586932	8.7495503557903e-05	1.1581594512008	8
1402	1	-0.000284146487195665	0.000272941232131626	-805.342385241033	6.39971014222692e-06	2.34936434352061e-06	9.7279193293562	43.8477088223185	0.690180380280441	0.022574546319305	0.00028040053720877	2.2674025605786	8
1403	1	-6.85158767139612e-05	0.000155345785499691	-483.469914369241	4.7821689797166e-06	1.35233677795927e-06	5.81133307628389	66.1999315782029	1.48800194263878	0.00972792878303608	0.000131346433470406	1.39720845784805	8
1404	1	0.000249050179899904	0.000331146807217271	-1173.7947138743	3.05262451423403e-06	1.25419257254715e-06	4.81046699784095	126.94623613396	0.353092562331618	0.0237403857961453	0.000119791960277346	1.7488922816138	8
1405	1	-0.000529446644571693	0.000161559557680417	-352.28181206376	4.94945386384152e-06	2.25059873962211e-06	8.80035819949047	16.969460971369	0.268328787968366	0.0317159532599476	0.000273834293938728	2.16152077302754	8
1406	1	7.5415496538564e-05	0.00025173407574151	-851.387884310707	5.35985620410689e-06	1.60653275739082e-06	7.02232695469243	106.677373713723	1.12395921661105	0.0150566439155853	0.000124667925686062	1.44234552708187	8
1407	1	0.000245949035829764	0.000330747643699908	-1168.91989943146	1.19277180290796e-05	4.61073220454514e-06	18.936882324792	126.635059849378	1.38439911916323	0.0236156573146218	0.000459608703045888	2.15989213312467	8
1408	1	7.81979154993026e-05	0.000268595882517546	-906.378049813023	4.47687767535992e-06	1.21154106874586e-06	5.1329932512818	106.232176482302	0.883097325842334	0.0160283504737606	9.78936413022291e-05	1.55414536088284	8
1409	1	1.87036562797863e-05	0.000307565627392127	-1019.55047394332	6.57448983555773e-06	2.24378470159634e-06	9.35221132750842	93.4799808130821	1.22049866501185	0.0176547660057054	0.000130343504551317	1.36581955633358	8
1410	1	0.000406681305674714	0.000232565117959564	-898.661451896308	8.86930918257855e-06	1.26977391182257e-06	5.94517966711747	150.236451029264	0.555098062169825	0.0268420904358493	0.000442612257388118	1.52783147442446	8
1411	1	0.000228927706038131	0.000389780719338962	-1362.98027986726	1.40562485926691e-05	4.00191679400295e-06	17.7985367004816	120.426753344229	1.55759280640685	0.0258997759331407	0.000453260498066448	2.26692243508411	8
1412	1	0.000289453419059898	0.000327357840749672	-1172.61969850236	9.87048214796294e-06	2.49547299802629e-06	11.3073348453192	131.483469241371	0.993485155606896	0.0250367749125076	0.000389626406215246	1.75717098303563	8
1413	1	7.6559929451862e-05	0.000250038957876542	-847.632686393105	5.90690723737391e-06	1.47439362503348e-06	6.56666624596903	107.024169261419	1.24113870065138	0.0149826984220738	0.000127839050362098	2.19478085468798	8
1414	1	-0.000356044536603024	0.000258192176562711	-732.240691869831	8.82708649961136e-06	2.46405190298052e-06	10.9041593687706	35.9484283083119	0.723372614951153	0.0251991298495113	0.000417736023948697	2.1348375316922	8
1415	1	-0.000274426956038852	0.000280443789814203	-833.727768414247	7.21387302517839e-06	2.64931828352922e-06	10.9365847861849	45.6212720220391	0.800033140192269	0.0224814838366854	0.000308766740848085	2.14613698268871	8
1416	1	0.000274603222383903	0.000337880190270151	-1202.17633166985	9.01723027324155e-06	2.9513571572945e-06	12.6715405938526	129.101576803489	0.952872803618023	0.0249463697935823	0.000351280686575384	1.52687454857852	8
1417	1	-0.000151081120742823	0.00013505103172486	-387.758783089354	6.62934084791364e-06	1.99836304936923e-06	8.5074298063459	41.7934489406748	1.31830046447414	0.0116106027217882	0.000293286116997952	1.68385362674037	8
1418	1	-0.000282839336117708	0.000286377938009788	-851.711904293868	7.71728267713713e-06	2.3245713603678e-06	10.1155112914819	45.3561809369927	0.815452111112502	0.0230618463399423	0.000324839267474251	2.53196528369552	8
1419	1	-0.000265571430654397	0.00015471460413928	-415.68809042352	4.99606027825671e-06	1.32030633151074e-06	5.8954530059872	30.223900077931	0.514807544041984	0.0176099291293212	0.000250255427208178	1.55024048851303	8
1420	1	0.000348532657154915	0.0002940144407898	-1083.30146824261	1.09540498067439e-05	1.96678286505273e-06	8.58856936726233	139.849761448065	0.907384947700652	0.0261258373085695	0.000485197354007963	1.90359526578945	8
1421	1	-0.000178537271244604	0.000295185295134987	-916.129576430875	4.52945317907604e-06	1.98993596231767e-06	7.88298875428082	58.8331430970385	0.666032246911048	0.0197657905447954	0.000166001813945094	1.75264701909892	8
1422	1	-0.000398974566935336	0.000192828905206805	-499.027249874796	1.28602532823093e-05	4.07494353322457e-06	17.42922520727	25.7950018070101	0.865215594193725	0.0253894444598473	0.000671151606251892	3.41886980958218	8
1423	1	-0.000251979591037463	0.000195464041980742	-556.787214420317	5.32842730155306e-06	1.74084409064103e-06	7.20623617716086	37.8012259924871	0.636689052595989	0.0182718656800489	0.000248853682966213	1.87184300541775	8
1424	1	0.000487926757637531	0.000252504111203551	-989.181292174854	9.52834204151832e-06	2.93430908322954e-06	11.9889803153827	152.638248627243	0.531463252203937	0.0314778020554911	0.000490974527492059	1.59856653209625	8
1425	1	0.000104380696510631	0.000294361078070092	-1002.30065517891	7.15958883025059e-06	1.25340957606556e-06	6.11129548355028	109.524551120182	1.24030009884138	0.0178946165234777	0.00015289603461862	1.70623696242174	8
1426	1	-5.02326516762133e-05	0.000319801539562299	-1038.89603055138	1.00794208624995e-05	2.27696578787233e-06	10.7652537005432	81.0732347970795	1.7634610173145	0.0185479400400652	0.000156973346003085	1.18634073414562	8
1427	1	0.000151390809593827	0.000302527113042517	-1044.50380173627	1.0677701832899e-05	2.62851885176041e-06	11.9611280864092	116.584328357492	1.62948529313806	0.0193827330930105	0.000305117006063706	1.67208189241006	8
1428	1	-0.000439042361342735	0.000201520661462161	-516.248217136109	8.31390346762534e-06	2.58895951729282e-06	11.1100458126433	24.6551463813152	0.497074266709321	0.0276785904205781	0.000437324851953024	2.711334047935	8
1429	1	0.000246806997449272	0.000336261572975394	-1190.66589293256	1.89470596842305e-05	6.58917559889401e-06	27.9511277374753	126.277672765386	2.16538277873147	0.0238989700025911	0.000710795751945265	2.56595282981133	8
1430	1	-3.07036171635243e-05	0.000189674271690406	-610.371533415316	1.18441645232639e-05	3.88231800661882e-06	16.5076395935822	80.8049779923912	3.49136748720555	0.0110089990886593	0.000244899233778176	1.60066614850426	8
1431	1	-0.000507444439150681	0.000131746458318909	-257.68824419819	4.75164307355257e-06	1.80014356784352e-06	7.49344591270578	14.5542154154809	0.230843917176549	0.0300383438380436	0.000264784231936917	1.52552891816472	8
1432	1	-0.000426503812214303	0.000145650140685836	-333.827639063443	2.14524413436617e-05	6.47116060421285e-06	28.3294653995412	18.8549264198424	1.17597873586843	0.0258225053062233	0.0011693340158349	3.45521221822505	8
1433	1	-0.000394290856921015	0.00015067881731254	-359.53154786119	7.65865412135642e-06	2.50762631741437e-06	10.603516053309	20.9144282718988	0.488686245312445	0.0241846133344552	0.000413093707461584	2.55744053831726	8
1434	1	0.000477449412962179	0.000311303916868525	-1181.62047415011	1.05556922972694e-05	1.94518979319888e-06	8.94259407088598	146.895068600009	0.60224691769891	0.0326569860010864	0.000510264691103114	1.56131906359611	8
1435	1	0.00020850155243418	0.000337032727541546	-1181.73050449927	7.2243791522652e-06	1.69150909781576e-06	7.91909706256587	121.742546597427	0.897485605163893	0.0227070583906652	0.000232843104937865	1.34324615085493	8
1436	1	-8.36563151052842e-05	0.000281558203904693	-896.860479157989	2.93563258202748e-06	1.53257072957325e-06	5.86124225157435	73.452310845321	0.555492674139768	0.0168291073285616	9.68505220798427e-05	1.11356383230789	8
1437	1	2.09761037072051e-06	0.000254345663309967	-834.34470161904	1.06066727060876e-05	2.78852987950587e-06	12.5756800567225	90.4725124662994	2.38918041862268	0.0145734283412651	0.000159844137068792	1.30704396355887	8
1438	1	6.08781682197601e-05	0.000316684274747485	-1061.05913964319	1.01472825422813e-05	1.95006782158665e-06	8.85604629775145	100.881574548669	1.77166761590688	0.0184768960857582	0.000155194014894124	1.36928808887196	8
1439	1	-0.000212825989285857	0.000231306473804195	-690.515535584536	3.74774492663892e-06	1.22203398414071e-06	4.91873177942131	47.3827199821531	0.524867573965286	0.0180092566158976	0.000154253168027925	1.27220012225292	8
1440	1	-0.000597378928177596	9.95129041150326e-05	-121.803825474295	4.2295088786398e-06	1.15472972522307e-06	5.07730361188332	9.45763277300443	0.126237451724083	0.0346989367682795	0.000239286068460808	1.5222428038648	8
1441	1	-0.000143288421393516	0.000259256438300097	-806.678287173158	6.81655555705886e-06	1.54692491080732e-06	6.56020796869027	61.0710133515863	1.16300589584774	0.0169720763985026	0.000204229454192451	1.77296216711218	8
1442	1	-0.000204499966267283	0.00016428541360541	-467.080873463449	4.55056679223183e-06	1.3563300281926e-06	5.89123682033993	38.776716531348	0.663958686288083	0.0150296265724421	0.000209007486291588	1.53442474568561	8
1443	1	-7.38919098399093e-05	0.000240290522011682	-765.531371354144	6.99829000093228e-06	1.58546005329367e-06	7.37898502629846	72.9067762479929	1.52822951548782	0.014403883951303	0.00014638728139452	2.17480994269896	8
1444	1	0.000241038654328384	0.000393633060209781	-1380.26141502279	5.04936460769016e-06	1.39192991865455e-06	6.12631852910511	121.48094925156	0.542097169024	0.0264459958009979	0.000165683907034499	1.49944051471455	8
1445	1	4.53708297685136e-05	0.000293598481636557	-979.688815051567	3.94391627668906e-06	1.03556557159134e-06	4.46018216174078	98.7846352399703	0.752323125245957	0.0170216277571456	6.80390880478805e-05	1.87016777731995	8
1446	1	-0.000113886439094143	0.000256449456545785	-803.687956812132	4.06848504636175e-06	2.17501777885413e-06	8.24168907683652	66.0545089603865	0.780347608207	0.0160772039552342	0.00014806384164686	2.50911530375992	8
1447	1	-0.000326771711319701	0.000222888704042983	-622.263387710502	9.66045052987606e-06	3.14810865389481e-06	13.5537601508032	34.2976254375465	0.873878750432812	0.0226632953785213	0.000468420622366461	2.01749303880265	8
1448	1	0.000173257449133492	0.000428197037103988	-1472.05188212429	1.49687504126239e-05	2.16132081266048e-06	10.3742119839052	112.029282436248	1.72407703207912	0.0264661117033143	0.000341554696455951	1.64596185449641	8
1449	1	-8.31463543007331e-06	0.000277598961109492	-908.604943264025	8.18606885909233e-06	2.65500206847321e-06	11.3995192599527	88.2843915111346	1.68815080680703	0.0159123813456574	0.000152699222645417	1.88472937918378	8
1450	1	-3.5118056322977e-05	0.000291585915459292	-950.530872965769	1.43803260111124e-05	3.45707087718175e-06	9.76766341823345	83.1324823988406	2.78645765010586	0.0168273733519868	0.000219952985109519	2.16100493864588	8
1451	1	0.000115012774807884	0.000290823554000455	-993.379609512342	5.64295535639493e-06	8.5477428277365e-07	4.37584886717912	111.577444224004	0.963096817548285	0.0179186787721051	0.000127326418843416	1.39349908905166	8
1452	1	-5.2623001468891e-05	0.000163251470048694	-513.762559304137	1.13780660364841e-05	1.55049915024842e-06	8.51361862660199	72.1336265544678	3.62093565051377	0.00982755781896572	0.000217144446712414	1.54952300075441	8
1453	1	0.000272249749516833	0.000335776517950737	-1195.9829447078	7.69657751947671e-06	2.24853489620729e-06	9.89428393402831	129.035360398078	0.814320393440429	0.024767804607535	0.000295208610082084	1.74359769669879	8
1454	1	0.0001796276762728	0.00031145008301941	-1084.16792087971	9.75400644706932e-06	2.37134096538787e-06	10.6836037683862	119.974038617405	1.35966951196558	0.0205999838017306	0.000303004648277655	1.57971325850133	8
1455	1	-0.000481744105853235	0.000181869274078637	-435.883465096645	7.56896403430344e-06	2.93756242960977e-06	12.1776753923674	20.6826536574926	0.426601504013538	0.0295033638569748	0.000410051838857697	1.92267452721945	8
1456	1	-0.000381003384157135	0.000269727458856351	-764.019293312454	1.04169053664659e-05	2.94954259386822e-06	12.9815768228603	35.2961960918356	0.795645961393249	0.0267465418843926	0.000496820586972508	2.18953495102451	8
1457	1	-0.000421391052884177	0.00022161121781951	-589.871503044177	7.01076423917946e-06	2.05504114559436e-06	9.00966889584727	27.7400592354656	0.449582348964764	0.0272791648849022	0.000359720099469915	2.35085224901173	8
1458	1	6.35354231456823e-05	0.00030531949405987	-1028.34035818772	4.14047499983198e-06	1.29425967434112e-06	5.50998981600661	101.755194197604	0.746318948843714	0.0178682689505649	8.72165597060995e-05	1.44457620250737	8
1459	1	-0.000465870742057519	0.000202185374016346	-509.021611178201	5.10805636150555e-06	1.5940703323981e-06	6.81916944557333	23.4605818805292	0.282587339000331	0.0290978199732592	0.0002709273428261	2.43774149882067	8
1460	1	-7.408058940576e-05	0.000186225790762423	-584.39106696484	4.34762243642607e-06	1.33451946556396e-06	5.54873986967265	68.3073453015161	1.16345087384609	0.011483191766132	0.000116298788085309	1.90004452156315	8
1461	1	-0.000288210131773584	0.000264201582904563	-774.5529580587	9.53035828038462e-06	2.84661870162207e-06	12.392380946027	42.511415207943	0.992572450623441	0.0224016636355202	0.000417332033568015	2.27248032354349	8
1462	1	1.63729181880202e-05	0.000179764327720618	-592.340626405919	1.0445603172606e-05	2.18791141899023e-06	9.19110215696682	95.2041355577619	3.30250744913626	0.0103423699661391	0.000136133349688604	2.13547288616171	8
1463	1	0.000472475870102285	0.000335373750171146	-1262.78402473662	7.69648145636321e-06	1.7512949902301e-06	8.03942558193857	144.632030653997	0.46261740300314	0.0331974003696018	0.000364254613180332	1.84272816483618	8
1464	1	0.000265292031898614	0.000349017031361497	-1239.04478233713	3.82030664855193e-06	9.5335272132773e-07	4.16093938651338	127.238901221972	0.404581708326896	0.0251183498879755	0.000139413260957305	1.94418317864282	8
1465	1	0.000306280657885402	0.000266639784883057	-977.324206707225	1.30858868786321e-05	5.46454516315632e-06	22.1799174783442	138.958037579607	1.34457719298966	0.023266926360435	0.000601704856410385	2.05781845710653	8
1466	1	8.44170407484077e-05	0.000340101315853359	-1149.24739275994	5.44674919621232e-06	2.34005129802156e-06	8.49949598042377	103.939754607267	0.86924560543322	0.0200776651607839	0.000150282597307778	1.26620052859857	8
1467	1	-8.02265752193998e-05	0.000192409621692139	-602.280704644774	5.05805295191438e-06	1.46455887497936e-06	6.37171030682966	67.3659531373116	1.29243176970635	0.0119441795770285	0.000135784415852068	1.71871385008886	8
1468	1	0.000122369356485398	0.00032850399843224	-1123.65154573831	3.97523761539365e-06	1.54871656733199e-06	6.18825111750233	110.430610002565	0.615231787013837	0.0200853480017429	0.000115046474361948	2.03284870750037	8
1469	1	-0.00046511804953259	0.000254746810963149	-687.462417065842	4.59171712762266e-06	1.66741652619522e-06	6.72088441727017	28.709677451459	0.28593214957577	0.0303846322699428	0.000235263036805863	2.10026622168507	8
1470	1	-0.000416177504426492	0.000163575934085548	-395.856520249135	6.63605495993998e-06	3.20572132820101e-06	12.7829440741779	21.4569941032548	0.492828774250266	0.0256209387290767	0.000360187952495577	1.76247082747115	8
1471	1	0.000142172455588175	0.000351730300412586	-1205.51910452522	1.02803026329166e-05	3.15498898741226e-06	13.7039909886677	112.008988413967	1.4504792375079	0.021736722791303	0.000277149800478938	2.09778030104818	8
1472	1	0.000180159662987734	0.000274394844880365	-959.916376702381	9.6837194583187e-06	2.68678697967063e-06	12.016601413789	123.287736557794	1.43619186161524	0.0188075110930015	0.000330591825557696	1.59016702398181	8
1473	1	8.22582295140803e-05	0.000382807794752848	-1292.44311350993	3.1603783064413e-06	2.21061365185369e-06	8.18479116173656	102.127378477865	0.457223042725645	0.0224339287631778	0.000129543678375048	1.36832093580076	8
1474	1	-0.000269210433334131	0.000244073308054884	-714.862907397635	3.57457520437827e-06	1.41908848818224e-06	5.59055580010146	42.1962848086436	0.413268961656452	0.0208202192886517	0.000161260625511825	1.14775240574937	8
1475	1	-0.00023640427016598	0.000166084664733777	-462.801008964979	4.8262987535298e-06	1.54047474246211e-06	6.49626954436027	35.0897718417197	0.604335155654096	0.0165535320966228	0.000231887543477548	1.82017992107552	8
1476	1	8.57186658562547e-05	0.000281668978393865	-953.497165884883	3.63349985646711e-06	1.19473436195198e-06	5.00066846982684	106.926270292829	0.679838593331334	0.0168692142889313	8.92319600716728e-05	1.95364323534129	8
1477	1	0.000331107029135021	0.000376202922053957	-1350.90904888371	9.59693316836202e-06	2.39253455504278e-06	10.9439677946351	131.35193617487	0.843211343361782	0.0287143023082024	0.000377577985291773	1.46329160878705	8
1478	1	-9.78449128399543e-05	0.000253261851063672	-799.117643173714	1.32719096795031e-05	3.49280589218858e-06	15.4320840473416	68.8765125123017	2.62604448544248	0.0155561142102556	0.000331581740107289	2.35790810096472	8
1479	1	0.000159970496888124	0.000294904588501533	-1021.81996896841	8.23583888752004e-06	2.69429585991362e-06	11.541414754881	118.477543089121	1.25563528963211	0.019222650143206	0.000262749001973602	1.38906813591256	8
1480	1	-0.000421067103725512	0.000214521413638589	-566.010102865611	9.25931327685428e-06	3.08324682903824e-06	13.1028142932365	26.997516221269	0.608823175775747	0.0270759333872945	0.000479460840992084	2.84780168803638	8
1481	1	-0.000186650901263252	0.000182240399621174	-534.291913118855	1.23960478370119e-05	4.13030009704712e-06	17.6050811371574	44.314998513415	2.00975320600184	0.0149464164140625	0.000534400041174477	2.58697217103731	8
1482	1	-0.000107704457235885	0.000350416580646971	-1123.04224818987	1.02900824604057e-05	5.14689673868857e-06	20.1403571277454	72.9146034969608	1.55533925688385	0.0210043559716269	0.000330848561724201	3.13017296266258	8
1483	1	3.91610957786156e-05	0.000200866019813975	-670.150101152652	1.54942981869892e-05	2.5251523397876e-06	12.9745361554902	101.032071611174	4.25996158830453	0.0117254589088702	0.000221416257089364	1.85007524554799	8
1484	1	-0.000358467772260424	0.000171402987917409	-441.990116627612	1.52344955289593e-05	4.69443262069689e-06	20.4077330416149	25.5550061956566	1.12738715949189	0.0227658355085225	0.000795982383212266	3.02500266897132	8
1485	1	-0.000263021685666276	0.000308282833031266	-932.336051355527	9.44992006498865e-06	4.19788903844303e-06	16.4613389038498	49.5297515404514	1.08698376201739	0.023218487708391	0.000396204957566997	3.3272073154197	8
1486	1	0.000305692973043524	0.000284070478318137	-1034.72267024171	8.92953655110159e-06	1.38216188184943e-06	6.98004946825694	137.099694453993	0.846079492519138	0.0239098665510653	0.000378642293447927	2.41169365661539	8
1487	1	0.000116952257807116	0.000282072269312033	-964.672613995403	2.46773164355215e-06	7.05328802265147e-07	3.00591520123165	112.519779255485	0.430719913750296	0.0174956384940117	6.57733169360782e-05	1.23455812461604	8
1488	1	-5.94552412568807e-05	0.000261587628559825	-838.872612027539	1.49007627797076e-05	4.78296184420657e-06	20.6935744411799	77.195003420617	3.11165697369021	0.0153701211904433	0.000327436963665581	2.1291698359701	8
1489	1	0.00019740240199031	0.000299204334168607	-1049.00451183507	3.41367675413116e-06	1.19573642681665e-06	4.76740969108778	123.415144902895	0.46745350445798	0.020538034092084	0.000121950627021079	1.94796455724737	8
1490	1	9.82112265634248e-05	0.00028030668454252	-953.242425073111	7.76022291075841e-06	2.37270665237085e-06	10.3588670466299	109.308961540478	1.42087026377734	0.0170176448991981	0.000195130668302721	1.51173075716342	8
1491	1	-0.000441787454961619	0.000182139808021177	-450.183650530411	5.78586430485822e-06	2.97085446771573e-06	11.6417683504152	22.4053386119608	0.422335422546521	0.0273794121925732	0.000313272326305808	2.30333212859301	8
1492	1	9.17402811828751e-05	0.000268260897055378	-912.605349245683	8.62194781070521e-06	4.08991892556122e-06	15.7780797910085	108.8797422762	1.67023268915006	0.0162441551800327	0.000273341085599048	2.57174467743836	8
1493	1	3.58957313570981e-05	0.000349351590616063	-1164.29666297371	1.05713042137726e-05	3.63696859288078e-06	15.3664099138444	95.8665301837048	1.71671674417989	0.0201217546417922	0.000216338764441511	1.94307033946541	8
1494	1	-0.000216832318935602	0.00019731912717941	-573.751764291683	9.1676496702117e-06	2.52308842621061e-06	11.3185221108932	42.3024425394393	1.25980545768773	0.016797641975387	0.000400487831820682	2.09092701739314	8
1495	1	0.000226072329910822	0.000344359321008989	-1210.08772174062	2.67506954809805e-06	7.29342737654824e-07	2.93103479140639	123.284949587798	0.315977318054827	0.0236022466093004	9.10805833070804e-05	1.18858081395131	8
1496	1	0.00069413060132077	0.000264855062633951	-1102.33799922632	1.29558358044671e-05	1.65293168897076e-06	8.80059821298043	159.114959526812	0.375576058631762	0.0425675365475797	0.000694363753995208	1.95227039514223	8
1497	1	-7.67168234040981e-05	0.000220886899881913	-699.752725107495	9.51769430301498e-06	2.54575089775917e-06	11.0726303428627	70.8472369381826	2.2125323262915	0.0133974748754326	0.000225821866694311	2.24429767831862	8
1498	1	7.75079822746423e-06	0.000299575015908846	-991.049565430303	8.37252827830682e-06	1.87347532926557e-06	8.40246510699101	91.4820627641482	1.60025917405598	0.0171701274313421	0.000108021218418185	1.52534288343139	8
1499	1	0.000140601293644827	0.000257367347313069	-892.612638593955	8.00499335616392e-06	2.21637792104629e-06	9.37363919449172	118.648039092464	1.38808809844971	0.0168030724277344	0.000246518775021127	1.63048575259942	8
1500	1	-4.61846874145077e-05	0.000331130425067875	-1075.98139960291	3.88969979229542e-06	1.10540085812614e-06	4.73645583415423	82.0598477133619	0.66071337721163	0.0191560258390098	6.98751189302262e-05	2.42502816562122	8
1501	1	-0.000170913592595712	0.00025197834551065	-772.66776460239	7.87684431764399e-06	2.02647915328567e-06	8.60373374113871	55.851472210703	1.24523363846569	0.0174450864913922	0.000270949403434593	1.06234484955204	8
1502	1	-6.55167290737097e-05	0.000294055525089167	-949.189811955332	8.73050067009812e-06	2.12187236631331e-06	9.48033328344459	77.4394347939148	1.62303248218062	0.0172612593983104	0.000160982002403435	1.7937299125625	8
1503	1	0.000317662707080735	0.000264013243418354	-972.15326786023	8.5482876122792e-06	2.40012366713667e-06	9.9063880570194	140.269627695503	0.799988662843354	0.0236661789056427	0.000386790815501725	1.77125671949586	8
1504	1	0.000106244957617659	0.000343312587433709	-1168.80034378795	8.74671693206937e-06	1.29952736542491e-06	6.67621045155504	107.195729370472	1.33357202117938	0.0205907602058062	0.000164348010002446	2.2916262393982	8
1505	1	-0.000130121812240056	0.000317162025484609	-1003.13458273373	9.48617689056002e-06	1.68172382731833e-06	7.90447213831039	67.6931674444055	1.47067346672439	0.0196419615616605	0.000224737556225129	2.24786065465432	8
1506	1	9.80483741356148e-05	0.00031618071783171	-1074.51501097572	1.24268094153326e-05	3.93004228493286e-06	16.9241484232381	107.228784547947	2.06419212536775	0.0189668694938518	0.000301212346676845	1.61529076149546	8
1507	1	0.000274662654405611	0.000283799959881982	-1022.38045391447	4.99748719094387e-06	1.89082777178164e-06	7.32694611349744	134.06263674986	0.554797756453478	0.022628712210377	0.000213806264149637	2.09504780862956	8
1508	1	0.000113906253266377	0.000279152090562107	-956.288129367072	8.67505132562123e-06	2.17468487168451e-06	9.83160548346964	112.197606246122	1.53436760122604	0.0172745130170142	0.000220390880742409	1.62735445703051	8
1509	1	-0.00056548595327142	0.00013596121899026	-253.713066128372	4.52269018227493e-06	1.52896264596373e-06	6.39635562117178	13.5191634691715	0.179711486308495	0.0333232834871922	0.00025278183126402	2.0824711871021	8
1510	1	0.000323668830335522	0.000331037484301778	-1199.7867860628	7.88533871700755e-06	1.57042612148297e-06	7.16584046661633	134.355168969507	0.71085911974881	0.026526603036956	0.000322338629643899	1.53885725655978	8
1511	1	-0.000224508769787666	0.000237559414392067	-707.470393134295	5.24783100030738e-06	1.76097279068059e-06	6.90401109218677	46.6178307552647	0.701382744201239	0.0187278032910569	0.000219156757140822	1.61296011285788	8
1512	1	-0.000110131649792106	0.000236750669786646	-739.768679973919	9.47791849850819e-06	2.12206288932297e-06	9.90510357040943	65.0530985419088	1.89589180523417	0.0149606573015433	0.000254193747055076	1.72096176895094	8
1513	1	-0.000248932416843583	0.00021701751093207	-627.066722782938	1.06440921406305e-05	3.60776223592203e-06	15.1124761802774	41.0816865993757	1.30200406406785	0.0189218338484807	0.000479346544821479	2.50797387670205	8
1514	1	7.5659955759236e-05	0.000179122204249371	-608.587550484443	6.3996196892178e-06	2.31034652111334e-06	9.51222238439091	112.898852986218	1.75719650928307	0.0111409270698175	0.000187684476574667	1.29461576096752	8
1515	1	0.000375263956770153	0.000327013882035348	-1200.62020792151	3.90539169323811e-06	1.39442866631799e-06	5.41990605922692	138.9303362402	0.319168333873268	0.028519320324051	0.000176674220800929	1.70873415029842	8
1516	1	0.000241814224445793	0.000294773493268154	-1048.51399428604	2.84992820018812e-06	8.45112528071434e-07	3.6020479313287	129.363368394417	0.340774958443048	0.0218450645122914	0.000110122347567202	1.38783949457958	8
1517	1	-4.48153630965758e-05	0.000303622115176337	-986.379014836709	6.9372144446361e-06	3.17906093878145e-06	12.7634869176277	81.6036290272764	1.28411948446531	0.0175847458599208	0.000189310797780415	1.35841455343004	8
1518	1	0.000293059504204137	0.000291212270105194	-1053.72081169761	6.21468827331143e-06	1.5351651931458e-06	7.08895491747698	135.181145777792	0.625991067723491	0.0236714404888687	0.000260076079797847	1.18541294993217	8
1519	1	-0.000604781881235941	0.000202392274013207	-467.530542803996	8.90145072982266e-06	3.82079874721427e-06	15.2356337102288	18.5029893623123	0.412762414470743	0.0365403197600358	0.000488615456767316	2.50042977934912	8
1520	1	0.000174123079555602	0.000274624578783803	-962.712959085456	7.9493214957649e-06	1.53884630640842e-06	7.3054285337974	122.376348671926	1.19181795833941	0.0186310421545954	0.000255004417062323	2.1180528341187	8
1521	1	-0.000574553299984888	0.000144947539449854	-281.898177826383	4.23386153064997e-06	1.53128391087586e-06	6.28669182287965	14.1590554410893	0.175041301084167	0.0339508896780671	0.000236189836194072	1.83539504573846	8
1522	1	-3.14540206436802e-05	0.000268705402698556	-874.933724099725	5.52422405647962e-06	1.32300496967913e-06	6.0028768328836	83.3234755641693	1.16245887796826	0.0155008058859778	8.38006206664383e-05	1.93671630253311	8
1523	1	0.000332993961860293	0.00027787572222674	-1022.84388171653	1.36468316719631e-05	3.72003113340145e-06	16.6952842998115	140.155786942395	1.21515935560357	0.0248494558112213	0.000615674885911249	2.12735930764064	8
1524	1	0.000125235531628469	0.00028894930796546	-992.345646940503	6.43769960597969e-06	2.41286851753874e-06	9.72253729835707	113.432726814493	1.08874434023119	0.0180436803911164	0.000193921546629134	1.98154947731391	8
1525	1	1.03047939980675e-05	0.000350209657974354	-1159.31104932115	6.67298199690089e-06	1.14069947710212e-06	5.19709017659422	91.6854215251306	1.09079743239166	0.0200742191110521	6.62897404254176e-05	1.53148773276693	8
1526	1	-2.01376191511168e-05	0.000199903696470154	-647.506345651273	6.23114144885004e-06	1.78249001561227e-06	7.82713618048011	84.2476235828757	1.76874292206223	0.0115116062212053	0.000107731392600775	1.6827984420755	8
1527	1	0.000399102422542784	0.000377038223501337	-1374.15940391879	1.57611754778202e-05	5.4726398198389e-06	23.2119486695396	136.628371225815	1.20339873757656	0.0314574443226832	0.00069085419774753	2.690053450874	8
1528	1	-0.000111305462615146	0.000314190558179789	-998.726050308473	3.36893297533421e-06	1.43475205381261e-06	5.60627060663364	70.4927489235039	0.552030906083057	0.0190980339838518	0.000100790802426045	2.04582325997106	8
1529	1	0.000156657060030091	0.000276999625522608	-962.477661762358	1.55592412894752e-05	3.78639237089711e-06	16.633493067159	119.490317661577	2.46140504879895	0.0182332257867017	0.000477757436239181	2.38878470589842	8
1530	1	0.000582167743269293	0.000366103966886204	-1399.70854299449	1.23651758296593e-05	3.22407563087675e-06	12.4282880716456	147.835716768075	0.593687215667557	0.0394031389051861	0.000607748188961331	2.06518545863041	8
1531	1	-4.62658894140498e-05	0.0003067115657368	-997.968840027163	7.89638775880441e-06	1.5834610933248e-06	7.32732441377365	81.4218937550247	1.44294000240222	0.0177720860313286	0.000112258660043148	1.43665883696714	8
1532	1	-0.000532321332021485	0.000126697875947183	-234.131179561784	8.0033621611939e-06	2.9225327738924e-06	12.0646214874651	13.3878835997712	0.355352427593025	0.0313517507125027	0.000447779032935263	2.50539409418462	8
1533	1	-0.000190264799245593	0.000182547917605651	-533.379755514235	7.53937542378952e-06	3.8444236055169e-06	14.7043870500656	43.8141991963454	1.2844555918467	0.0151074567305898	0.000347011766894452	2.87391708210861	8
1534	1	0.000101946949901334	0.000340111676745628	-1156.59264230364	6.70276561236786e-06	2.09389326848862e-06	7.47593159433288	106.685866340215	1.04060309871102	0.0203435620406651	0.000159265146405287	1.56459323663176	8
1535	1	0.000182676803484162	0.000298972726065564	-1043.35723675585	5.32208391153653e-06	1.78342829705251e-06	7.2939078361276	121.425553691387	0.758075984492122	0.0200744245254043	0.000181329551461862	2.26009098324977	8
1536	1	0.000446343108805455	0.00034551323617255	-1285.01758904709	9.41926945623892e-06	2.31165109991726e-06	10.4255117322357	142.256623433924	0.613979752180038	0.0323404858453102	0.000434393778821147	1.80674441142575	8
1537	1	-1.15363293345105e-05	0.000317654074326537	-1044.50358012609	1.27591989702006e-05	1.49518092175016e-06	8.61027926723127	87.9200877142851	2.29838676660494	0.0182122358044694	8.96282244311078e-05	2.54276858920938	8
1538	1	9.26800642649734e-05	0.00025127831878697	-855.244575861412	1.60495984680017e-05	3.96120582596042e-06	18.2213705877241	110.245704527375	3.23467530471956	0.0153452585841762	0.000382888804171382	2.28804130884046	8
1539	1	-0.000577923479275116	0.000149725096305269	-296.24029441615	3.80046551796968e-06	1.55497185778551e-06	6.30975450793245	14.5245224140315	0.170990198445163	0.0342057755502196	0.000211972274123405	1.63304948886804	8
1540	1	-0.000120376564273039	0.000281513111092999	-885.014659067491	2.83632120905718e-06	1.18707966044239e-06	4.65238290834794	66.848179999436	0.49578897028105	0.0175422557513798	8.94051794589589e-05	1.77427002500167	8
1541	1	0.00057813441682092	0.000405244990920493	-1527.61568599888	1.18411878402258e-05	3.32335304015572e-06	14.7699623300089	144.971354162986	0.594143565312011	0.0404519054078207	0.00056620760189629	1.83206135979018	8
1542	1	0.000372622088598682	0.000382040588680024	-1383.26983197862	6.97648997938873e-06	1.73437847936201e-06	7.73996526214945	134.284962269067	0.551736138578587	0.0305769586284441	0.000288021259917169	1.15620859754535	8
1543	1	-0.000400115221350204	0.00017991540328388	-455.682439355074	6.53640076535478e-06	2.04880146279062e-06	8.67597578467167	24.2114947057121	0.426757825765155	0.0251359215273226	0.000344941489666629	2.27344758429231	8
1544	1	0.00011030933918978	0.000329479224942109	-1123.41349584576	9.57360147386267e-06	2.63788863883274e-06	11.3224156411656	108.510498202135	1.50338409574682	0.0199076822396194	0.000225538169488234	1.7673182112512	8
1545	1	-0.000111519526893571	0.000214358570755663	-664.91240579135	9.43844205925394e-06	2.35532865413642e-06	10.2384664848965	62.5144036702764	2.00208742736584	0.0138445146436652	0.00027681251776498	1.96530979817426	8
1546	1	0.000455305631166701	0.000379620825553797	-1401.69273902684	1.02983338891311e-05	2.6468075029934e-06	11.7686575216378	140.179618462152	0.66700670903131	0.0339650959495259	0.000463480538859082	1.98619905646147	8
1547	1	0.000213905014491494	0.000434273805026885	-1509.39982735034	3.11067793778766e-06	2.14672978873411e-06	7.57236779782454	116.222918249681	0.34883657095119	0.0277366647261204	0.000135561369395718	1.6408425713219	8
1548	1	-0.000366940670815159	0.000181892381032269	-472.056510753877	7.6331838801251e-06	2.8056055078419e-06	11.7443684252691	26.3676011611423	0.590430975191659	0.0234654216455112	0.000398299380655845	1.67906745525798	8
1549	1	0.000314982700316378	0.000172188459258631	-664.759879017402	7.45960925453506e-06	1.86357363247633e-06	7.02922237563181	151.336334693143	0.627913938993862	0.0205677449099824	0.000378507023160166	1.46155536507154	8
1550	1	-0.000651949474743177	0.000101908309763982	-113.081798135977	1.29336559451567e-05	3.98090383887272e-06	17.2997239614041	8.8841940078278	0.3830288628756	0.0378075436529741	0.000732999813275184	3.0042997687303	8
1551	1	0.000201102613659057	0.000353812211655218	-1234.96845434518	6.46950537985049e-06	1.64264091883114e-06	6.93197959380921	119.613380103159	0.800047693348821	0.0233177157107036	0.000200612166996748	1.70358269551593	8
1552	1	-0.000172295222348128	0.000326867235360671	-1022.27192645764	1.10662120937648e-05	3.6983253337577e-06	15.7143106694893	62.2058049787089	1.54137382347938	0.0211706021916882	0.000350070646773911	2.38508253147982	8
1553	1	-7.12111623805346e-07	0.000302812988833741	-997.997496081302	4.77592665764987e-06	1.94024533510832e-06	7.85785624729322	89.8652603525033	0.90365691835505	0.0173499536719532	0.000111169413920353	1.44017446493298	8
1554	1	0.000249125228594646	0.000325451859210549	-1154.35877695916	2.47361277482644e-06	1.52924196828125e-06	5.49649550111498	127.433149205577	0.303780172058949	0.0234830422402865	0.000110733921022277	1.35656143721182	8
1555	1	-0.000176947766814954	0.000309510695469997	-961.60634751537	8.73397621839957e-06	2.69591177580512e-06	11.6507910966846	60.2433264082505	1.23736678457653	0.0204271605609279	0.000282255625114905	2.16101679520167	8
1556	1	0.000252552049121819	0.00032911512357044	-1168.27818094134	1.2037343429295e-05	3.28681361906418e-06	14.717753052387	127.501438971661	1.34757238643629	0.0237690684949143	0.000445658484941559	2.552947821453	8
1557	1	0.000307857544222866	0.000294397263207332	-1070.20557584986	7.85694689812292e-06	2.3337819582162e-06	10.1660213888967	136.280336679624	0.76482746861739	0.0244059841493822	0.000338221778740515	1.77678614087135	8
1558	1	-0.000352565061401294	0.000154477908488147	-386.697826317636	6.28506258544871e-06	2.15594729862883e-06	9.00791772989326	23.6608375075281	0.476823472811235	0.0220544496574462	0.000333540479670261	2.16138788432909	8
1559	1	-0.000300547225213993	0.000234070221861206	-671.562214546235	9.48403717934023e-06	2.5859811409471e-06	11.6171777463209	37.9119383230532	0.928644908758429	0.0218264201254499	0.000438274884756074	1.997860518286	8
1560	1	-0.00034297828706647	0.00023621146883402	-664.06512810927	5.47464912525399e-06	1.45898765592901e-06	6.42535655663853	34.5554477034516	0.458093950519739	0.0238607820507184	0.000262650291116868	1.91361118720798	8
1561	1	0.000326449259014682	0.000382439267281913	-1370.56040202875	1.10538417471396e-05	2.77853445928789e-06	12.4274879203991	130.483993433905	0.979817606595699	0.0288095160999262	0.00042864335215574	1.89886905797637	8
1562	1	7.99453821613778e-05	0.000198629589603718	-677.108127193365	8.5895980734072e-06	2.55663193727024e-06	8.29241959395325	111.924033634379	2.14754283619271	0.0122678515024006	0.000228544741723363	1.52132404079231	8
1563	1	0.000136876789558494	0.000233455179208861	-812.691533161863	5.65168550855943e-06	1.36588411452696e-06	5.95132375536849	120.383464559945	1.0425402442841	0.0155055307813825	0.000177150598347223	1.77127463689146	8
1564	1	-0.000138781756314951	6.79811383222366e-05	-166.349068063146	5.58768747447619e-06	3.11249078775108e-06	11.7029627554382	26.0975552973111	1.38003336742815	0.00885434127482654	0.00029802079071218	1.86905497070027	8
1565	1	-0.00020688576887123	0.000171605508971557	-491.484562891557	5.41530433884042e-06	1.55020638771701e-06	6.81610747462427	39.6746833865274	0.779602765259603	0.0154007568631869	0.000245452230182332	1.59741999358513	8
1566	1	0.00012566936317256	0.000252633351031556	-870.357329429472	1.07015954868441e-05	2.97788338514856e-06	13.3523070225909	116.447485498762	1.96417646715651	0.0161667932895284	0.000312909902635854	1.66899555105748	8
1567	1	0.000313468843788506	0.000337685791304674	-1215.80409074176	9.49475722211567e-06	2.52654021890568e-06	11.1776756525178	132.870107008431	0.891336748546112	0.0263992677586202	0.000385016697776672	1.76096236825155	8
1568	1	0.000104090968073854	0.000286849148976372	-976.347198208213	3.5466568995603e-06	7.579491452211e-07	3.45555147704097	109.944671753471	0.627865625394569	0.0174838855657526	8.0444557034287e-05	1.32524595575422	8
1569	1	0.000240967132955949	0.000258145835107525	-926.988426413869	5.05345048393219e-06	1.55662409414262e-06	6.60420807264591	133.028745383486	0.623653032452709	0.0202331526406567	0.000208052328952463	1.33015018364663	8
1570	1	-0.000368406106845432	0.000260529253964523	-737.238701331612	8.18613510850727e-06	2.39748448666311e-06	10.4934301194557	35.2671680221373	0.649616007389498	0.0258529404266881	0.000391076172498696	2.65957269642937	8
1571	1	0.000234359453204949	0.000299641523376693	-1062.54680849714	3.4876378138591e-06	2.15841789987936e-06	8.10296081730259	128.030127484654	0.45969454939026	0.0217957077916822	0.000156986528349109	1.50573129184332	8
1572	1	-3.27235184642264e-05	0.00021335829830397	-688.264983012695	5.51839577834943e-06	1.61210958621145e-06	6.92229128006295	81.2802920412111	1.44931784130107	0.0123674755870127	0.000103117369380149	1.73237394453583	8
1573	1	0.000522644200524336	0.000217147134591706	-884.930444013691	2.94880540604244e-05	3.33123156519505e-06	12.5444856739763	157.438193368341	1.18697230262032	0.032427071212652	0.0015619511661765	3.10628554053089	8
1574	1	-0.000429977523763949	0.000107524645465233	-203.514441475477	4.59424730415332e-06	1.54985236002946e-06	6.41640236755624	14.0400390168833	0.241947167982866	0.0253945207313393	0.000256274352332272	1.51583011846981	8
1575	1	-0.000219542346113241	0.000245552474777045	-735.917068497274	5.93814420812289e-06	1.53909577691675e-06	6.8101820411998	48.2008954201283	0.790436715972776	0.0188724028122067	0.000236107366192301	2.01799798797866	8
1576	1	0.000214157858858308	0.000350036030095874	-1225.16671095994	4.33839656608947e-06	8.5624506402281e-07	3.64774166762983	121.458987489484	0.520468812836168	0.0235114396721485	0.000136309485665573	1.44832702322415	8
1577	1	-0.000180944297883841	0.000263754201427705	-809.536676919046	4.26261810926934e-06	1.50188465581795e-06	6.09410496428828	55.5485605363562	0.647773217491716	0.0183263316808961	0.000155319297031391	1.68285463868705	8
1578	1	0.000278914938416294	0.000304133950740702	-1094.81028352313	8.27779969642428e-06	2.22938254602253e-06	9.37011666255279	132.523290240031	0.872507376138985	0.0236438643630663	0.00033410037339898	1.25337262529153	8
1579	1	0.000277972191359009	0.000389562205354374	-1378.40590111483	7.83739651514049e-06	2.29244672794547e-06	10.0650459687527	125.509763512313	0.780266847362649	0.0274199197357916	0.000281890530136842	2.02122385230281	8
1580	1	-0.000453091909566146	0.000148036209704329	-331.737236365944	8.12810270938474e-06	2.45775017510998e-06	10.661772282565	18.0934813740154	0.41343480135136	0.0273107389496374	0.000444832290300074	2.83595196656598	8
1581	1	-0.000463765956240167	0.000122170115734499	-244.042628060322	1.3173456103757e-05	3.70080186497475e-06	16.4930655226584	14.7581714648715	0.586111087811971	0.0274783512476233	0.000731878644784741	2.05033283206219	8
1582	1	-0.000158122411772111	0.000176216069477949	-523.731115907128	6.24877164359708e-06	3.07661957776146e-06	12.0207444238098	48.0976988645319	1.23046193229125	0.0135652883272712	0.000272743265865432	1.81966180398875	8
1583	1	0.000217086803460771	0.000373940878991741	-1306.73961674764	6.14928844055421e-06	1.48705354266201e-06	5.38525098478985	120.136783642768	0.711612292488916	0.0247739449077926	0.000191625370163056	1.57723236281065	8
1584	1	-0.000285556704472116	0.000230297427621792	-663.947189105376	4.9617828360976e-06	1.34331332831192e-06	5.91017911884633	38.8856833341064	0.513165618536337	0.0210190037151676	0.00022650409185334	1.91948640829495	8
1585	1	-0.000228824976718165	0.000239254223764137	-710.639101310587	1.44570443846844e-05	2.02875014947848e-06	9.88988909319759	46.2763929375176	1.82437528676977	0.0189685763235445	0.000578653541251219	2.6288959437045	8
1586	1	-0.000292086828937612	0.00020303083833206	-569.280539450578	7.47241119597451e-06	2.41553559929237e-06	10.3630578983461	34.8033335263231	0.757611025682605	0.0203812150641625	0.000360316224947514	1.78844962366251	8
1587	1	-8.19578060968091e-06	0.000244178908091972	-800.503047393731	5.40856613413381e-06	1.47208854864913e-06	5.94750912687311	88.0776086706205	1.26772704891899	0.0139982990773149	8.49355443840977e-05	1.78575234630934	8
1588	1	0.000264361498482054	0.000357497238808813	-1266.77972430007	8.64457157590117e-06	1.18297862870893e-06	6.37682998731914	126.482126725978	0.900251101687796	0.0254751270030624	0.000299490117215634	1.97370699353625	8
1589	1	-0.000297748580978477	0.000159363790307892	-420.87118201353	7.54963633480703e-06	2.5652959033724e-06	10.5952863050915	28.156998415916	0.715934623895442	0.0193496106836335	0.000387627582437848	2.30362404588228	8
1590	1	3.53329644201607e-05	0.000200593253511742	-667.933226549801	8.96247221667308e-06	2.25246422372036e-06	9.60540728858864	99.9897393649631	2.48536162557608	0.0116700786802824	0.000155208359713355	1.97733577212018	8
1591	1	0.000145600250494434	0.000301468786812182	-1040.86461091326	4.23046483250692e-06	1.55676397517096e-06	6.14049680837367	115.779128913424	0.66216588149392	0.0191819265002096	0.000132527348323925	2.37984657315959	8
1592	1	0.000389624285990378	0.00037208414563735	-1357.31656746993	7.42404638529893e-06	1.82914552276192e-06	8.43425668472932	136.319137869972	0.563144339238942	0.0308682116672969	0.000316024595365587	1.57278423350495	8
1593	1	7.63586618844369e-05	0.000305392870790146	-1028.66578994702	1.48367685654668e-05	2.01799030883423e-06	10.8486494780911	104.038087659101	2.62130843294556	0.0180363841597568	0.000234736649259922	1.46623351512767	8
1594	1	0.000353092159282408	0.00037248432680422	-1347.05165752718	3.61718829953982e-06	1.29699456390357e-06	4.93539860012671	133.469045048434	0.309525074928449	0.0294066702245175	0.000152439126871967	1.73977423715424	8
1595	1	-0.000136196218124585	0.0001746765158932	-525.382489286739	5.50854477985496e-06	1.84243097782934e-06	7.63081418603982	52.0562660459813	1.16129509760777	0.0126908914741648	0.00021117047941564	1.73341851238776	8
1596	1	-0.000681913362086507	0.000173759414130477	-347.252668912005	1.90991410151432e-05	6.26138428772466e-06	26.4302240681714	14.2954142882151	0.625693972487016	0.0403192156651642	0.00106410871606031	2.72027652515697	8
1597	1	0.000225646719668867	0.000331964408401965	-1170.10992744484	4.8449702335404e-06	1.62259192672799e-06	6.80023501642627	124.205187604191	0.586591100388893	0.0229981571382325	0.000173965996172889	1.29184671936276	8
1598	1	9.06489047898246e-05	0.000311321333604583	-1055.76706518427	1.31315104395085e-05	4.69601725333746e-06	19.6486092818009	106.234225075098	2.23989398298411	0.0185781676903218	0.000333134649230395	1.66481728943366	8
1599	1	0.000334943055596065	0.000324719344083489	-1180.41641363809	5.32879233102607e-06	1.25924297075982e-06	5.80223084688751	135.887921801368	0.46889394634766	0.026728924586422	0.000224890650318662	1.15202092289615	8
1600	1	0.000620267548453745	0.000487445430092898	-1814.47042109883	1.59944645182489e-05	4.82197777749012e-06	21.1699868235947	141.837498982676	0.76879039622542	0.0451996022579522	0.000740487969992098	2.39086207087924	8
1601	1	-8.89520381447603e-05	0.000345586550600246	-1112.13060531935	7.82034669542632e-06	1.66103311638131e-06	7.00622695276988	75.5657099531522	1.2178114453162	0.0204460467342926	0.000144808271005225	2.21546494772555	8
1602	1	-0.000100881251658864	0.0002093039174099	-650.751450488539	6.88879471369831e-06	2.78968474494072e-06	11.4803225826197	64.2666522422185	1.55914971110994	0.0133125057105588	0.000223830307240685	1.1467497761927	8
1603	1	-0.000286743788031307	0.000281396289769265	-832.239217627213	6.61201227279596e-06	2.26393458903861e-06	9.55835497450588	44.4607315237358	0.699520190709286	0.0230187784875397	0.000285245899035713	1.95418762264566	8
1604	1	-0.000637223436588526	9.65992366438789e-05	-99.1490688520539	8.44840754954548e-06	2.77767905597526e-06	11.9144990558849	8.62006329082291	0.268845688612686	0.0369273412742643	0.000479184033333866	1.91320639053063	8
1605	1	-0.00032014118464141	0.000155144191364603	-399.231417755781	8.8766660111757e-06	2.92836096453472e-06	12.5395393857942	25.8553752317492	0.754212320683135	0.0203831366146403	0.000463495848157415	2.10848312947761	8
1606	1	-0.000294818277607179	0.000271510176355442	-796.094540000309	8.09022446969917e-06	2.87876048781231e-06	12.0728005222878	42.6432358960236	0.839928033310068	0.0229637864274252	0.000358811569764253	1.88898271523767	8
1607	1	0.000271798447819843	0.000317640484162328	-1135.51316774442	3.05744953749184e-06	9.16173334514745e-07	3.88674154598736	130.552925677461	0.328683378999106	0.0239527781883169	0.000120674311843381	1.51523176118876	8
1608	1	0.00017523176147427	0.000352462691592934	-1220.35578141845	7.01056973320044e-06	1.07868793306037e-06	5.27515486226789	116.434911088378	0.916438676673515	0.0225527209822189	0.000187186501131897	2.26256659641677	8
1609	1	0.000276845444301515	0.000300921206045886	-1081.91162685787	5.48944344648981e-06	1.41217118724569e-06	6.40716542132236	132.613842998639	0.581714544713164	0.0234280861501759	0.000221116737344266	1.45374238864845	8
1610	1	-0.000294267752217096	0.000203450729742184	-567.033335886597	9.70934403139759e-06	3.27176461186187e-06	13.9517876725008	34.6591922690151	0.983764846359627	0.0204976160338504	0.000469841968283838	2.01196166314652	8
1611	1	0.000436647292322367	0.000414202613832455	-1511.88918197258	1.40740705509435e-05	3.47670034174433e-06	15.7043890170383	136.511062265248	0.952851774631436	0.0344835197929285	0.000600885699140069	2.32199665383106	8
1612	1	-0.000131247137428737	0.000234225602367528	-727.488316150126	4.35899675321052e-06	3.27584852827664e-06	11.9706873794624	60.7361293224677	0.880507921935214	0.0153834036307217	0.000204243810895339	1.33953148712071	8
1613	1	0.000170656859754449	0.000186216713078052	-664.627404327418	8.45119481150984e-06	1.43359761438724e-06	7.00110355435621	132.503458608886	1.43028066164201	0.0144721954788736	0.000332711551088826	1.62072524582434	8
1614	1	-0.00020154630076743	0.000183318180333862	-532.299619607901	6.6780396344745e-06	1.97988311750866e-06	8.43560739568798	42.288358522967	0.993904309372597	0.0156099680754664	0.000293163457578072	2.60010921076371	8
1615	1	2.14365077407662e-05	0.000289780249990895	-962.130058791387	5.57227454518655e-06	1.54075980010383e-06	6.79406641326262	94.2307519119384	1.09599121652523	0.0166485517030139	9.11347292583044e-05	1.577299860635	8
1616	1	-8.16486861612469e-05	0.000279343310805947	-894.209546547836	4.93607194549883e-06	1.29355567205708e-06	5.66261881064911	73.706994185767	0.935477689065567	0.0166748623102251	0.000106565388751628	1.22710317921255	8
1617	1	0.000709904553215239	0.00034227459939721	-1364.61842542938	1.64157112699636e-05	3.77408411585663e-06	16.5470303917347	154.259344699902	0.57421395158103	0.0451553312393003	0.000852407796640699	1.9178873719939	8
1618	1	-0.000199335735259842	0.000183104972982877	-532.847272265597	5.4768683712399e-06	1.68978295511875e-06	7.11331624905299	42.5698286539844	0.827345341576786	0.0155082395497459	0.000240201948236464	1.72181105174817	8
1619	1	0.000356650478066988	0.000472578460480641	-1681.74977361088	1.37254404944288e-05	5.84061847141967e-06	23.8779229543515	127.041508372831	1.11355553190816	0.0339222894982072	0.000543844416119244	2.29417343910625	8
1620	1	0.000468991193219075	0.000341609835218824	-1280.5916771846	5.4389446002309e-06	1.38470641188939e-06	6.24034383026691	143.930672626933	0.33497915623821	0.0332438952567031	0.000256185414307529	1.55665749955589	8
1621	1	-6.55832777906034e-05	0.000317227741806767	-1023.59844439556	4.52655219095781e-06	1.3538826154513e-06	5.74774936751109	78.3192994265837	0.785545389203543	0.0185601715526218	9.23460879695558e-05	2.77791722516656	8
1622	1	-0.000375201277920703	0.000219609107313674	-595.939698138706	7.06492847971386e-06	2.37739421957749e-06	10.0423067038318	30.3408707360232	0.542528064493062	0.0249091143080591	0.000356060305076048	1.79464627370687	8
1623	1	-0.000513948697968353	0.000214904562497216	-537.361497920967	5.23097218813352e-06	1.71739622119063e-06	7.2670023994668	22.6919504446087	0.263886392637995	0.0319177694576069	0.000279105944207698	2.24246868378441	8
1624	1	-0.000115692176588477	0.000254632102780146	-797.721898718855	7.30966501097867e-06	2.41605404020631e-06	10.289493450211	65.5653119846495	1.37862507255734	0.0160246148341798	0.000214236834907675	2.31346176057835	8
1625	1	0.000155682707789619	0.000195562613479153	-690.84463967431	8.84780287912978e-06	1.8578665726879e-06	7.78805165188326	128.522455812136	1.60869800077542	0.0143218635693643	0.000326532939939565	1.78334565829967	8
1626	1	0.000197537936037081	0.000287718235985143	-1012.33915669075	5.05822970425575e-06	1.72001703109003e-06	7.01203068182532	124.472219655633	0.702999137456744	0.0199963920072435	0.000183054352328701	1.34585082594551	8
1627	1	0.000216547633597521	0.000304553049862486	-1075.21372202478	1.45945706874267e-05	2.92186206909748e-06	9.83747128735412	125.41412839155	1.84207100025091	0.0214109525114452	0.000503408725329615	1.65205061902893	8
1628	1	-6.7527005552652e-06	0.000292937161896622	-962.586551478016	1.28635498775033e-05	3.56402504626867e-06	15.7970297293612	88.6794685562964	2.51470555150396	0.0167885213079444	0.000204854708808726	3.05878062672167	8
1629	1	9.28018151567157e-05	0.000336972995909146	-1143.42596347082	6.87070531926328e-06	2.04401432280728e-06	8.91259285037498	105.397469446203	1.08951243037787	0.0200259172831636	0.000153862358297861	1.36919680526	8
1630	1	-0.000378868209956548	0.000204766908305761	-545.088254325575	5.85403630519292e-06	2.39570436722579e-06	9.75977497554943	28.3898923472229	0.464487516163366	0.0246751699694698	0.000302203892644884	1.94937846027588	8
1631	1	-0.000147095888563884	0.000223443266125804	-685.899704085938	8.10940394233825e-06	2.35167113949098e-06	10.3004924818889	56.6425199754813	1.47691962289472	0.01532746064143	0.000279174240453137	1.78861825358933	8
1632	1	-0.000112355354975102	0.000175338416076109	-535.734938977556	3.65265527210677e-06	1.1140296801355e-06	4.6052746639363	57.3485992224564	0.862155646189113	0.0119317390695812	0.000125050264678905	1.40765293265531	8
1633	1	0.000169923043475221	0.000389770263450895	-1343.5402973518	1.29932456689991e-05	4.11910537403513e-06	17.8440936279929	113.555127607542	1.62021228515395	0.0243621409962884	0.000367852382496026	2.46254760990687	8
1634	1	0.00035016970792513	0.000355164129600975	-1288.28265082216	7.19994557153917e-06	1.96796206241356e-06	8.75122565400143	134.594299202143	0.609990780154723	0.0285767743255008	0.00030055119411983	1.86998116248644	8
1635	1	-0.000499886238228906	0.000155300734099534	-340.136427395121	5.39707541195038e-06	1.86224667656445e-06	7.75714634464569	17.2585645828472	0.261935019587773	0.0299917284597768	0.000296998539544787	2.40745124405304	8
1636	1	0.000200089067790839	0.000266691877565818	-941.806003451812	8.21679484821045e-06	2.64137575470866e-06	11.2866754430064	126.879543155552	1.161884198309	0.0191028102362338	0.00030737800220235	1.52484747042608	8
1637	1	-0.000225636225322578	0.000141904082703235	-385.132358739401	6.32911080640472e-06	2.19205845100565e-06	9.0282023272244	32.1660530939031	0.826846081040676	0.0152721437335117	0.000314168307180504	1.73684189792637	8
1638	1	-0.000141588523306168	0.000264236978907303	-823.377436260335	5.34743396004168e-06	2.02612221763416e-06	8.3945083394683	61.8158504543798	0.91923274346545	0.0171761705364588	0.000177230405414334	1.70056953830209	8
1639	1	8.7960681932248e-05	0.000344179015886517	-1165.63395775688	6.01754504485747e-06	1.5929653916692e-06	6.99089083053473	104.336032713746	0.942478492562612	0.0203538178965914	0.000122913068425189	1.32255408968415	8
1640	1	7.32792319717173e-05	0.000272325454775037	-918.872989085225	7.18395069912623e-06	1.67783756118095e-06	7.38226334415465	105.060805738575	1.41219197990305	0.0161581203927312	0.000141622092613864	2.5804760548546	8
1641	1	-0.00023310156269849	0.000254928421896478	-759.218561868881	5.88658730951192e-06	1.93765714233704e-06	8.28881291262316	47.5608141139345	0.75249633781404	0.0197919253170653	0.000241894739343431	1.48752915237729	8
1642	1	0.000202935071404551	0.000249961807233231	-887.412005396477	1.75819769512189e-05	4.79745745546189e-06	21.5500820141062	129.071913120034	2.48794651740256	0.0184474206932066	0.000669844360563702	1.8781523489824	8
1643	1	2.7002646866108e-05	0.000307921636329138	-1023.96060102137	6.62703914660223e-06	2.27200547785265e-06	9.51998722135913	95.0116322929077	1.22425293933247	0.0177103164425603	0.000133853638842564	1.86610260136703	8
1644	1	-0.000130029759029975	0.000209426350484066	-643.361929980156	6.36186122792571e-06	1.57994625918866e-06	7.09636523883966	58.1644587615305	1.27107701954326	0.0141239770270261	0.000207081993120769	2.03146213573445	8
1645	1	0.000742939320540242	0.000388972818830718	-1529.99293397897	1.03256010919892e-05	2.42888669199454e-06	10.2218871732022	152.365274111115	0.358731249339677	0.0480485275920444	0.000528083169461681	1.9302168318295	8
1646	1	0.000106342505741642	0.000291188963684114	-994.98477950771	1.01764898319291e-05	2.78080724320127e-06	12.4059123477924	110.062244905242	1.77551837321014	0.0177616671541614	0.000249809879645147	2.09808069372912	8
1647	1	-5.11043084636117e-05	0.000243441092572803	-783.87756385821	9.08042775492734e-06	2.68869920044771e-06	10.2988403573385	78.1443508009921	2.05089519647688	0.0142521697404163	0.00018481088746969	2.44416068662896	8
1648	1	-0.000375875481700653	0.000207079353243249	-554.922765373321	7.87326614663652e-06	3.09286056592114e-06	12.4346430268534	28.8514856988088	0.622975038276582	0.0245881160435033	0.000404257914098117	2.52689730111261	8
1649	1	0.000246605778399578	0.000393294500883419	-1381.72188502357	3.20004771197928e-06	1.2220686658231e-06	4.66294856372219	122.088770981853	0.34408592735266	0.0265975218454741	0.000114044256667481	1.38423547114698	8
1650	1	-0.000121893543009893	0.000259484140103659	-814.736123324658	3.46109766628203e-06	1.55409930128081e-06	6.152741587184	64.8380518399206	0.639853178389718	0.0164260165214216	0.000116638306792287	1.27695479824445	8
1651	1	0.000144800310447204	0.000310770224699443	-1071.32647628887	1.01783984302763e-05	2.93516008220707e-06	12.4627556271283	114.982699528946	1.55568506620991	0.0196437853628595	0.000289658568257773	1.76705495158932	8
1652	1	-3.78440611571805e-05	0.000318451654733292	-1038.47581798601	1.07421136159806e-05	4.70516556404859e-06	18.0197393393071	83.2228853044301	1.90838520075519	0.0183743216745995	0.000277380309469326	1.52599142243039	8
1653	1	0.000197071186500165	0.000323236927013039	-1131.77242064626	6.36081625493451e-06	1.84291167751443e-06	8.04571003141825	121.369839195956	0.834687942115741	0.0216907587487185	0.000210049330363662	1.59114344233356	8
1654	1	-0.00048894797172001	0.000200982020781967	-498.662722541664	1.01086546498918e-05	3.01928795651411e-06	13.1396868380438	22.345108788252	0.514883596004116	0.0302890354464296	0.000539714882185919	2.37510222294377	8
1655	1	-0.000544897889057993	0.000212358427295992	-518.362750416177	3.31136976673364e-06	1.2549035051772e-06	5.04480544257832	21.291932483108	0.164318089035516	0.0335074875788166	0.000178694713164495	1.73230521361675	8
1656	1	-8.54917106479624e-05	0.000235095478560916	-744.911186760212	5.87653796378755e-06	1.8602278686957e-06	7.55285793934529	70.0163670393364	1.27326946302931	0.0143329619852466	0.00015255772515683	2.08102784466664	8
1657	1	0.000184646583767008	0.000232014300409516	-820.771928930426	9.19828362607213e-06	2.67126067159918e-06	11.7668746627224	128.514226231073	1.42735432247328	0.0169894296446955	0.00034934911124356	1.77046493807355	8
1658	1	6.31424286820619e-05	0.000325118801032079	-1093.04409194138	9.93440814726983e-06	2.98382225882549e-06	13.0993975027277	100.990784858003	1.68997573659555	0.018975994832573	0.000199853389033342	2.29289146321067	8
1659	1	-0.00021370555969647	0.000253726555059677	-765.570558184737	5.19365911707713e-06	2.06383575177232e-06	8.38736618964681	49.8936636479695	0.723501706592767	0.0190069387795972	0.000211964201344633	1.96268550371222	8
1660	1	3.27575396928035e-05	0.000384101052979049	-1279.13518555162	7.8245768060753e-06	2.51411603690642e-06	10.7562021346782	94.8745978912192	1.1591874327104	0.0220872562757108	0.000148496928815606	2.14677981714493	8
1661	1	1.85438533864196e-05	0.000223345436334059	-738.66922588568	6.61317178740118e-06	1.64059745456003e-06	7.36829536278496	94.7462493742946	1.68524824022066	0.0128407827442629	9.87841869019658e-05	2.26079509936805	8
1662	1	-0.000294409034249539	0.000203305355634838	-569.882288886591	1.25489775059908e-05	4.10998179968271e-06	17.5939619255699	34.6271764089672	1.26384629002749	0.0204995408255684	0.000606587128995452	2.64687274286634	8
1663	1	0.000215600957964899	0.000286958641475739	-1014.19564964717	4.65952868353353e-06	1.2763924657876e-06	5.34581327494339	126.918677763916	0.607126049954349	0.0205650368002921	0.000170690691774633	2.03305699381534	8
1664	1	0.000234504268024783	0.000330576561584898	-1167.17493419286	4.44119790418467e-06	2.84454542781379e-06	10.3319977585111	125.351111868949	0.562445246127076	0.0232223333240427	0.000198359643251008	2.46916192203482	8
1665	1	0.000183260475296206	0.000444681061812705	-1534.59921532879	5.52218482184892e-06	4.12634321529532e-06	15.2761441716814	112.397375149148	0.636402546296943	0.0275571622444204	0.000249628110627633	2.36566641698494	8
1666	1	0.000177244348528779	0.000280933826589581	-984.821515213875	1.15045258443617e-05	1.80407524326638e-06	9.08749239200294	122.248293911722	1.68647554867127	0.0190321509908244	0.000362422661495465	2.35094933740578	8
1667	1	-0.000280028485190415	0.000167237478308831	-452.707598754799	4.99151805341429e-06	1.43194227789932e-06	6.10286684008651	30.8463225948831	0.498763199102985	0.0186879404776619	0.000249115487821455	1.48670112674382	8
1668	1	4.92135600951676e-05	0.000319529991052957	-1070.19405610184	8.84119994964884e-06	1.77354040555025e-06	8.47761643911419	98.7558136870997	1.54934266145476	0.0185235919316824	0.000126620344362728	1.75389622334209	8
1669	1	-0.000101620403141961	0.000240165385348857	-756.58049027177	1.01022530904213e-05	2.37146781686056e-06	9.96099349203582	67.065477312961	2.05416424957086	0.0149415832079001	0.000257939030481827	2.84190551684933	8
1670	1	0.000176509274251467	0.000269810093649681	-945.369704615089	6.25514237944855e-06	1.7748116134882e-06	7.61044232201157	123.192638864305	0.946099248213388	0.0184731583304654	0.000213863698079724	1.39301733435392	8
1671	1	-5.75863764855273e-05	0.000278332027490878	-894.673607320399	2.97562676744231e-06	8.44924367699269e-07	3.6048493220389	78.3105440135775	0.588412922400755	0.0162849991022824	5.86564350326706e-05	1.29528360802203	8
1672	1	0.000170846853843635	0.000314564654425085	-1092.84415452759	7.33673280681805e-06	2.01867441126638e-06	8.9358367999571	118.507340044969	1.04339296906779	0.0205099331004419	0.000224903886930965	1.77596774677972	8
1673	1	-4.53938790943556e-06	0.000271340677346684	-890.598741419137	7.13373553739647e-06	2.12113560601694e-06	9.32203961564314	89.0415609213447	1.50594313952542	0.015548850638595	0.000121707290537814	1.36642013513799	8
1674	1	-2.13574617206669e-05	0.000250171271554312	-814.537648224068	7.25897042326264e-06	2.21599048057725e-06	9.59652494065378	85.1204130014693	1.65102590571144	0.0143858970056101	0.000131360390074483	1.51855412907122	8
1675	1	-0.000183660712454399	0.000231970220812609	-701.52547936014	5.02988215911098e-06	2.22723367621596e-06	8.86830682424127	51.6298392242913	0.809228720966348	0.0169523325840544	0.000204968377360528	1.83704613899032	8
1676	1	-9.64884621971637e-05	0.000246193147143099	-777.025896503086	6.73638817722055e-06	2.03375589477232e-06	8.84979489754724	68.5987042464876	1.36847412245669	0.0151504912496705	0.000177779981196215	1.23489057346039	8
1677	1	0.000285052314526076	0.000316005237277451	-1134.83652834377	5.21516903008952e-06	1.27090734171245e-06	5.80676559891197	132.052018428153	0.533802332249794	0.0243836533437332	0.000207317547131168	1.18351351492242	8
1678	1	0.000200997884606763	0.000354664219371575	-1236.84552056528	9.53330673554936e-06	3.64324172827219e-06	14.5592068183454	119.541410495684	1.19272668767436	0.0233572089929339	0.00032482424921549	2.57996776204104	8
1679	1	-0.000125307083852369	0.000345920869343751	-1102.07510970527	4.27650251413889e-06	2.64359997358141e-06	9.81074461957994	70.087483466855	0.641670463344209	0.0210801055024774	0.000165061375914296	2.84961870477165	8
1680	1	7.34815820414026e-05	0.000314847034006855	-1062.49129719229	9.32674070976912e-06	3.10478980643054e-06	13.1244636804396	103.137003496302	1.614453274053	0.0185241951789976	0.000211570046889791	2.57329582543621	8
1681	1	9.95556872163702e-05	0.00027834638128822	-949.097962664449	7.43025768168778e-06	2.25278128530972e-06	9.60019433897769	109.680521517106	1.36395089176083	0.0169374733937104	0.000187953406246011	2.01938481718025	8
1682	1	-0.000415762592821169	0.000191451740199614	-487.801294949611	4.69347599390927e-06	1.68523117460302e-06	7.02763130259626	24.7252820511299	0.311608816685521	0.0262257167840687	0.000247579307636399	1.69328953000495	8
1683	1	-0.000345719732757831	0.000148209284402244	-366.754353889595	9.52759191591171e-06	2.75513712258675e-06	11.8659516518688	23.2047066270505	0.689753118458614	0.0215517533858645	0.000505570431277629	2.02192150572531	8
1684	1	-0.00038265478738554	0.000199443673292272	-526.058366019671	9.86600139587899e-06	3.28799320126292e-06	14.0861878324285	27.528996499731	0.718669908832713	0.024723805520722	0.000508783544152331	2.57350098039793	8
1685	1	0.000134882128993876	0.00031044338752749	-1068.04642614679	9.26034402182638e-06	2.54436346382798e-06	11.1359453095244	113.484088833091	1.44790642168849	0.0193934387551451	0.000250162179684495	2.54517846642974	8
1686	1	0.000300212357231616	0.000368495864402773	-1316.38235760758	8.42135735562644e-06	2.10934395929928e-06	9.03941891174548	129.169589854735	0.803245212494209	0.0272330780460379	0.000318839091936751	1.56599266021131	8
1687	1	2.2854182733423e-05	0.000252019219079323	-837.081773739625	5.86441111729408e-06	1.40984955354077e-06	6.35234213349553	95.1816538066331	1.32269492481551	0.0144988889479123	8.59814343887241e-05	1.95333366944509	8
1688	1	0.00010762512201203	0.000246739669613627	-846.261285902553	4.57055659989721e-06	1.49770728004173e-06	6.23341479065452	113.566298731497	0.900745672099588	0.0154234904635473	0.000130953007911871	1.40189343513958	8
1689	1	0.000152168495530388	0.000303190486863983	-1049.64751301833	4.74568216145467e-06	1.24559256821308e-06	5.52447104572502	116.651650409311	0.722559920291153	0.0194366770393799	0.000137639725715143	1.33087154201457	8
1690	1	-0.000322149128946969	0.000170934071264432	-451.817413533044	4.42467208309116e-06	2.33319402163154e-06	8.96436875291934	27.9506635367827	0.459360663645247	0.020895175052118	0.000232543478447417	1.40754702158492	8
1691	1	2.72569342669185e-05	0.000291944965334591	-967.984729996906	1.29434047310003e-05	4.49178210806638e-06	19.1089267853232	95.3338588504204	2.51958374302958	0.0167999587480381	0.000265357149164939	1.97036157725223	8
1692	1	0.000511745470966092	0.000371813396378375	-1396.22242634651	5.63583472071222e-06	1.05302002577058e-06	5.05548123545135	143.99937359457	0.309821728409927	0.0362428538025483	0.000263633292784412	2.07410909000115	8
1693	1	7.830299949605e-05	0.000315755531124428	-1068.07396654231	5.35125784054116e-06	1.55102583779579e-06	6.72240648193279	103.927594538074	0.917123203451887	0.0186394458364418	0.000113516722237913	1.77838141303443	8
1694	1	-0.000265534569549916	0.000196201227554028	-552.972093290804	6.53899370855449e-06	2.32112553924724e-06	9.78498904162294	36.4603788610755	0.748146111499813	0.0189165919649668	0.000311516354981063	1.79698874044206	8
1695	1	-0.000187971874378669	0.000318072625901689	-987.229049557381	1.39270478866417e-05	4.21199539966082e-06	18.1502561436137	59.4181205115782	1.88882582590575	0.0211687248844328	0.000456051359896297	3.04500207920149	8
1696	1	0.000435391679866441	0.000443026904988407	-1607.00893118589	1.66594766011073e-05	5.12288026662778e-06	22.2200032651098	134.501996922482	1.14494853486688	0.0355897960627658	0.000701041030255604	2.47266507866838	8
1697	1	0.000212358725305171	0.00020414368227354	-738.170843941263	9.04450315927256e-06	2.51333140484225e-06	10.8701549135773	136.129948500974	1.26909991516129	0.0168775575819211	0.000386685943193451	1.61606331181542	8
1698	1	5.81709488462443e-05	0.00024170328772353	-811.395521530171	5.29380593665814e-06	1.56711158667572e-06	6.8748566074249	103.532074177492	1.18919662598866	0.0142440045834462	0.00011250629444028	1.27177331494636	8
1699	1	-0.000116900974980642	0.000177168796052618	-539.025701969469	5.95327762983961e-06	1.45490584940158e-06	6.56244852469828	56.5820443958313	1.35862916100248	0.0121616441405195	0.000200328214257816	1.80797124652155	8
1700	1	0.00013208289251227	0.000275328223641686	-948.917327694422	6.30829388921371e-06	1.56340743405708e-06	7.10676381827903	115.628377973089	1.07467552368685	0.0174964758269027	0.000175963344343381	1.1257079103165	8
1701	1	-5.30124274964419e-05	0.000278047214463941	-899.224059716047	6.23790142528855e-06	2.24017413451536e-06	8.67611096414835	79.2055505033782	1.24322948301073	0.0162179007637633	0.00014274832377488	2.15873029099537	8
1702	1	-0.000580852353341042	0.000135766934851205	-248.436276904415	4.6449315671226e-06	1.82728525641734e-06	7.40867905319917	13.1559777744872	0.198799054952192	0.0341774022919878	0.000260243164188365	2.04058625262941	8
1703	1	0.000559159608450235	0.00028991820357609	-1140.56441628728	1.2945723290196e-05	1.81014983333118e-06	9.88602349696599	152.593749633113	0.561427544380475	0.0360877878910344	0.000660214751405555	1.97920822405502	8
1704	1	0.000195427038730024	0.000284405859220806	-999.901918794392	6.17577668885885e-06	1.75566504435335e-06	7.66361382724875	124.494568599235	0.861095943347328	0.019771478541486	0.000216865671865688	1.81059884296994	8
1705	1	-0.000452668248232627	0.000187607491558918	-464.342937402206	1.01760541947309e-05	3.48118299312496e-06	14.5693673570544	22.5114686970371	0.590713233925564	0.0280752286874701	0.000544005169017232	2.98644799219663	8
1706	1	0.000170846011527402	0.000286785450749742	-998.169827627249	2.50612795883407e-06	7.86827125136124e-07	3.20245526527354	120.783424692407	0.375950551364212	0.0191263444432366	8.30700640092816e-05	1.23233317075066	8
1707	1	0.000192226311189266	0.000263840794652833	-931.395706717075	7.01873939650407e-06	2.24078772611314e-06	9.29065444826486	126.07593303914	1.02225490483515	0.0187036200724719	0.000258543036963226	1.64763021947039	8
1708	1	0.000438820100214511	0.000385272511295882	-1416.89662241319	1.09038123687036e-05	3.13216913133427e-06	13.0159035742529	138.717717942543	0.742677133116841	0.033457885567401	0.000484174380463607	2.0379237068119	8
1709	1	-6.2114040666671e-05	0.000226662779821595	-723.035695331702	7.83438925462325e-06	2.45983084065699e-06	10.576268633747	74.6750455677277	1.84885060910207	0.0134656257650931	0.000180417095922036	1.80671486932738	8
1710	1	0.00028163591450255	0.000335474344446883	-1198.23864900318	7.78978306247969e-06	1.00781306211888e-06	5.39676982670212	130.013979953809	0.784992313911785	0.025096715597499	0.000290361133899938	1.66748799526128	8
1711	1	0.000194614245078576	0.000306042680844961	-1071.33697003738	4.17715270248025e-06	1.50520354829169e-06	6.09477867374921	122.452507914716	0.571281371682959	0.0207800359322334	0.000147612191879151	2.33144192219625	8
1712	1	0.000192899988064703	0.000355965620524133	-1238.26805485762	4.25567955104766e-06	8.48108914982279e-07	3.53483352935115	118.453539930866	0.532574667628659	0.023197497466839	0.000123779780613821	1.39752624333282	8
1713	1	-0.000370793224980263	0.000193672148124586	-511.374963284016	6.98921786978997e-06	3.71618680801328e-06	14.2285007827144	27.5788964974827	0.632419409980104	0.0239683042480863	0.000368384848659708	2.55350439840445	8
1714	1	4.86424952918103e-05	0.000332005720285492	-1111.90027609277	9.19760176711254e-06	2.69038478569078e-06	11.1507586999036	98.3351610440071	1.55534388574259	0.0192256056169811	0.000170581704881634	2.46100413740752	8
1715	1	-0.000288957601932773	0.000165553533579758	-445.160010453885	4.49671087348477e-06	1.78450675478141e-06	7.27172254657574	29.8098468098266	0.467848112339474	0.0190808245484675	0.000229256795613894	1.45220789393397	8
1716	1	-0.000487673267233533	0.000276333307397317	-753.389135954933	8.89128836009442e-06	2.79730403350085e-06	11.7546037288946	29.537459179461	0.512489023110695	0.032115561995397	0.00045021175016671	2.63845791453472	8
1717	1	-0.000147966323510304	0.000265164951160903	-823.894505789897	1.07194602662969e-05	3.42449004460167e-06	14.1865354633099	60.8377774360948	1.79408716371919	0.0173981611992531	0.000344855392524614	1.31239531350508	8
1718	1	-0.000378485334820071	0.000248533414987374	-693.432479963323	8.82327973640664e-06	2.67079375910307e-06	11.5553745602307	33.2910122739417	0.674809580965375	0.0259430316030205	0.000430841548320141	2.23591076276066	8
1719	1	-6.93328291036998e-05	0.000334297168595458	-1079.50124103827	3.00364694736123e-06	2.2029609427757e-06	8.00160714809774	78.2830385375435	0.499247280036531	0.0195614226283283	0.000128436651473325	1.85690687985186	8
1720	1	-0.000415600441635775	0.000230001548060187	-619.655492177969	5.09568425129321e-06	2.15342434411148e-06	8.63223843756533	28.9610140090807	0.374476217322795	0.0272154593810683	0.000262344422880461	1.50896348066306	8
1721	1	0.000327467137803722	0.000305134756282252	-1112.4820757826	9.05439206027805e-06	2.77274496804689e-06	11.5643224822083	137.021840378639	0.831712142266761	0.0256453450906804	0.000394694886546098	2.25260750171739	8
1722	1	-0.000454150113353771	0.000192021539146875	-481.647677053288	1.16539002433336e-05	3.38764448795764e-06	15.0071614025215	22.919376831504	0.639980484680305	0.0282512095609775	0.000619632990353912	2.14184281919189	8
1723	1	0.000234960813516869	0.00032380565047404	-1145.24040439433	6.5743798941973e-06	1.71812728398454e-06	7.72286118412345	125.965500468602	0.77563891689261	0.0229223698533758	0.000235136309160371	1.60252892913241	8
1724	1	6.93527696386393e-05	0.000284910274400857	-958.728996917244	6.93305146227835e-06	2.42542658470322e-06	10.2671608165616	103.680851457326	1.32101632480841	0.0168008251125684	0.000164494130483838	1.37741696031285	8
1725	1	-0.000470366608496314	0.0001932092467449	-477.113551198667	6.67648849714213e-06	3.39637901352848e-06	13.3346782970004	22.331049548843	0.454982117779724	0.0291350314713839	0.0003614884851603	2.51867122268279	8
1726	1	-0.000145661752847515	0.000186390185899938	-560.91240089712	6.32489432534816e-06	1.94929980029763e-06	8.15428625818965	51.992789266077	1.24158491543237	0.0135536488675712	0.000239871059544425	1.98608191393154	8
1727	1	0.000101258965630214	0.000326318407154829	-1110.77027336247	5.24487339771668e-06	1.36962807994623e-06	6.17090443740446	107.239495183387	0.842774861005549	0.0195761385338926	0.000116400567180485	1.50552895202964	8
1728	1	0.000341742656166315	0.000320654411989071	-1168.47889852839	3.02015882603413e-06	9.23459996739793e-07	3.84248648936917	136.82346734725	0.265740990213953	0.0268501045987364	0.000131281632025655	1.537348881717	8
1729	1	0.000326994998558238	0.000318317220419159	-1156.7035797694	8.6725073822436e-06	2.4437577329916e-06	10.7871086288357	135.770433414272	0.790699706803554	0.0261466923421096	0.000369204893681003	2.23802169678552	8
1730	1	0.000290539157958636	0.000359435207217951	-1280.34173675357	1.30935912633948e-05	4.33776892557909e-06	18.5830290184822	128.949349493881	1.30685071579724	0.0264807332614225	0.000509677592724338	2.22968260897694	8
1731	1	-0.000523077579348144	0.000202742227016133	-494.011579710805	4.51555818332795e-06	1.28098008825621e-06	5.60478466962332	21.186079230747	0.206543650799873	0.0321426003010856	0.000242689585814469	2.16319760855797	8
1732	1	-0.000378212500998421	0.000200036778044159	-530.544791276099	6.95474618206029e-06	2.33676254788463e-06	9.60967578916043	27.8743854075313	0.515868155969745	0.0245142512738994	0.000357762802029127	2.36565714438854	8
1733	1	-8.744337523385e-05	0.000234947642665465	-744.193796733844	9.35206227230565e-06	1.7114445576461e-06	6.84734432680646	69.5856196579247	2.00781355183239	0.0143636229330752	0.000208274360306185	1.59398511279049	8
1734	1	-0.000363444142775484	0.00019831472237898	-529.687800450054	8.62687937499656e-06	2.36797770804783e-06	10.247280446697	28.6192630304974	0.640108757976494	0.023722137942201	0.00043873280867371	2.9425330591435	8
1735	1	-0.000342316908399871	0.000236277136541062	-664.87982819209	6.27336512180413e-06	2.95654735113973e-06	11.5229813249104	34.6145723593841	0.59439817440131	0.0238317200161191	0.000311071565109239	2.24605698642437	8
1736	1	-5.32260339084583e-05	0.000269439308230765	-869.167205888834	9.35523366851306e-06	2.94906700322457e-06	12.6324002518847	78.8254547520711	1.9183655664664	0.0157360694402087	0.000195624885982388	2.47261752373324	8
1737	1	0.000195418047993052	0.000322306696543718	-1126.03389057315	3.5229250728909e-06	9.54072577004929e-07	4.0891132920667	121.228887941911	0.464056278908532	0.0215960103635666	0.000114615070013411	1.55433360304745	8
1738	1	-0.000113847270303134	0.000286613690781761	-907.857949816212	6.02829845025036e-06	1.5700717507839e-06	7.10544950963882	68.3362794784297	1.04642048665624	0.017669836577511	0.000152471084636014	1.66839703148903	8
1739	1	-0.000196480734597547	0.000290768553321392	-892.969211899196	9.57977020109868e-06	3.72880404523283e-06	15.4151859707429	55.9519663183148	1.34002317728454	0.0201067389662626	0.000354649258089807	2.56548123318628	8
1740	1	0.000130525461093055	0.000292448020446669	-1004.59241995585	1.21876692206847e-05	4.65566872889109e-06	19.2611352231896	114.052172205828	2.01987459747761	0.0183492123524616	0.000374614830207203	2.23225920592123	8
1741	1	-0.000173614231214308	0.000218892981432171	-659.378552839236	8.57541427302146e-06	2.92368490112737e-06	12.4558594386002	51.580425789859	1.42734170578112	0.0160075871387164	0.000332336295097492	2.02423649575843	8
1742	1	0.00030235456576288	0.000274989349423056	-1003.78700595882	1.84156919851586e-05	2.67011694549405e-06	14.4948393677912	137.713701099962	1.75898663505539	0.0234169054330664	0.000787342747963331	1.79422148375425	8
1743	1	-0.000336087644408723	0.000208296513938578	-571.01299009003	9.88874089838843e-06	3.66448604424289e-06	15.2815640356031	31.7893281804284	0.879508714225981	0.0226548357164518	0.000494128542094913	1.51889404617094	8
1744	1	1.12089912935486e-05	0.000242669651090856	-800.473669650201	6.10124466399753e-06	1.55983294319288e-06	7.12506336241328	92.6446312243255	1.43757425436801	0.0139187710038016	9.07220558975362e-05	1.20884739744324	8
1745	1	-0.000231534849929657	0.000323271136673857	-993.910895814378	2.78435718328752e-06	1.46064083869455e-06	5.59968749243372	54.3888172573918	0.348435789402134	0.0227827355840304	0.00011514401829249	1.30435301121856	8
1746	1	0.000354524878038589	0.000308856520084278	-1132.91926326912	3.70987477429129e-06	8.65801394539488e-07	3.82519024129226	138.938130252943	0.307424179518563	0.0269399982608149	0.000163549482588266	1.63848447208323	8
1747	1	-0.000233844639408634	0.000186903689102485	-533.99287887433	8.00857073834652e-06	2.72168206126293e-06	11.5684319494474	38.6340988345177	1.03990950343884	0.0171520539758205	0.000371423526395522	1.80850559627366	8
1748	1	4.08384423133519e-05	0.000173400138360434	-578.528815444443	6.6260739642408e-06	1.9070380971617e-06	8.3751912338671	103.252545087625	2.0791220129197	0.0102069155520894	0.000137426133446291	1.35309117772392	8
1749	1	-6.43315189352088e-05	0.000264258362614376	-848.442123593022	1.09336760177872e-05	2.83651247633208e-06	12.8393653036893	76.3179549699974	2.24243741645408	0.0155830851995802	0.000216544645841684	2.55764233917396	8
1750	1	-0.000648518262780347	9.31377254729742e-05	-84.3558403570073	8.06225862781732e-06	4.9031668615693e-06	18.8581969134204	8.17271850809283	0.436108348985807	0.0375385948602798	0.00045898256696869	2.44275711278773	8
1751	1	0.000280840707437022	0.00031334179384196	-1125.15417129525	7.89275960195557e-06	2.29931321901435e-06	9.81187748200283	131.869108030106	0.827149029979265	0.0241088332346067	0.000317370128753608	2.31446169850654	8
1752	1	-6.30021217266529e-05	0.0001934875546101	-611.329782983687	1.66610335099015e-05	2.75324236660243e-06	13.9697048213269	71.9640614984356	4.46719351630091	0.0116589097971769	0.00033144311864034	1.70778451455551	8
1753	1	0.000289586756092895	0.000291629850727407	-1055.44859049346	7.58108909000991e-06	2.13854098174939e-06	9.40646830159154	134.798594506465	0.778820636928454	0.0235476899148068	0.000318170504603367	1.70215955539797	8
1754	1	0.000176809490802836	0.000470626951273675	-1619.94780536266	3.74989042462826e-06	2.16681187492907e-06	8.14224602371787	110.590660194579	0.409377611624836	0.0288050952011076	0.000138622411397019	1.72340867137177	8
1755	1	-0.000543809339837444	9.83271123496386e-05	-135.59968389267	4.79250460919507e-06	1.67092276253005e-06	7.03010982102666	10.249016941728	0.192036058025944	0.0316632028249728	0.000270745162328586	1.55632686098443	8
1756	1	7.05475856123601e-05	0.00025182093827919	-850.942275806098	1.2345681724337e-05	3.18195976258722e-06	14.3662900731989	105.650205100256	2.61132775102695	0.0149837767905012	0.000259289379430538	1.94114113312185	8
1757	1	4.03608463210263e-05	0.000308963920231739	-1032.59985688187	5.16966920851564e-06	1.41235088013477e-06	6.30789537731032	97.4425678876339	0.943203352267465	0.0178527338022718	8.8941107407e-05	1.55316951329943	8
1758	1	0.000127590481685941	0.000220247944818586	-764.665308367413	6.95968540598519e-06	2.58826454777201e-06	10.163761498722	120.083877800345	1.38668581650431	0.014583828413123	0.000237529525766659	2.04585827184434	8
1759	1	-6.90002676645969e-05	0.000219435787016668	-697.93528666596	1.12730110475655e-05	3.27454384477682e-06	14.2160877896483	72.5445578731236	2.68974363967498	0.0131796608050081	0.00026376201639628	2.19490808087207	8
1760	1	-0.000679903461235352	0.000172298533616417	-342.672765385083	1.05591534540117e-05	4.31082748601516e-06	17.4070269315189	14.2203135447155	0.401770029140317	0.0401869893624394	0.000589586835320339	2.76600450448578	8
1761	1	0.00030117551684253	0.000337275704407793	-1211.3521797683	1.56006145962632e-05	3.97899205265792e-06	18.242830070468	131.763749180941	1.51223428555669	0.0259076769264937	0.000619166912447278	2.51603656236429	8
1762	1	0.000157814113896279	0.000350141038745387	-1207.48731854602	9.82093603927016e-06	2.23322031115133e-06	10.4505836484661	114.261844167939	1.34271448032687	0.0220051620440245	0.000258976973166561	1.05317498788314	8
1763	1	0.000343360310828927	0.000333467304234722	-1213.18652336107	1.51495590178689e-05	3.7342052738821e-06	16.9735525920967	135.837417312418	1.30350453675842	0.0274240795142759	0.00064027062467642	2.57935866714402	8
1764	1	-0.00039236117739167	0.000115817258158904	-244.393025391264	5.77765403478884e-06	2.06494314871354e-06	8.61488616412278	16.4455578717155	0.359742115181662	0.0234395704971178	0.000319254139310848	1.7734845938585	8
1765	1	-0.000500075987256157	5.26377868325236e-05	5.54201669310441	8.59521928848226e-06	3.92782152279606e-06	15.2109213819932	6.00880302959385	0.456750204747545	0.0288105312364735	0.000490330212996089	2.71305184639981	8
1766	1	0.000382627480210331	0.000319031827413734	-1176.73779308229	1.5659923689372e-05	3.93037687505311e-06	18.1211453094259	140.178914665804	1.20449558612176	0.02854371160646	0.000704056752347124	2.01605314542594	8
1767	1	2.12199029996091e-05	0.000280616333286004	-928.279370789036	4.44192628046846e-06	7.89377042344963e-07	3.8017144201883	94.3244146306036	0.901869968784609	0.0161240347389082	4.90123852224018e-05	1.19438063253336	8
1768	1	8.57134471164906e-05	0.000335078605589872	-1134.18400842865	5.01526803549993e-06	1.12066017448099e-06	5.01243168939501	104.348636205054	0.806216631171266	0.0198167587682008	9.45558586564706e-05	2.21275413677362	8
1769	1	-0.000282228293505778	0.000162171396482297	-436.043802031913	6.45283877586834e-06	4.24284006861965e-06	16.1977557559511	29.8821359101405	0.859972014561194	0.0186499622914198	0.000342683474964138	1.64132886724106	8
1770	1	-2.98042276730297e-05	0.000218976092100742	-706.563011845966	4.30238433174938e-06	1.42261422031101e-06	6.06357183632239	82.2492577122953	1.10637598153072	0.0126620846315006	8.73397925582436e-05	1.31676489901191	8
1771	1	0.000232884898949025	0.000346170891750308	-1218.34016883314	4.49755656423828e-06	1.43986335272023e-06	5.47917697800161	123.930515164147	0.524219019002453	0.0239047469445381	0.000159296165302822	1.89158098538687	8
1772	1	0.000299083906838689	0.000324133647249233	-1166.48241706479	8.71038291573549e-06	2.71086177795013e-06	11.6259775427149	132.698280115164	0.86524843126961	0.0252695680759416	0.00035716927185448	1.77969889339505	8
1773	1	8.87871744852018e-05	0.000259574580036619	-884.658415394469	7.32139841231994e-06	1.49142876961818e-06	6.94491167249815	108.88319134504	1.45028737169762	0.015718491323554	0.000158014715723405	2.05908210449238	8
1774	1	4.34389914979543e-05	0.000545711425114487	-1829.27436492842	3.54715299440159e-06	3.1685693266135e-06	11.2667921246741	94.5511857438469	0.371015023129365	0.0313658598241489	0.000181690272647453	2.23450069625607	8
1775	1	0.000288606066083513	0.000314891332822862	-1132.77878888085	5.39745536795966e-06	3.2021222765734e-06	11.9720042505641	132.506064479876	0.607537953178707	0.0244734138927356	0.000248906053126402	2.27129342791647	8
1776	1	0.000193398403770568	0.000298187788795549	-1045.67733105355	9.26982272060399e-06	2.25625129996056e-06	10.1554666155341	122.966603938097	1.2692894997282	0.0203637042995695	0.000308690922951322	1.93319790224605	8
1777	1	2.4270012872474e-05	0.000230372708403807	-762.445717677629	4.61735571234126e-06	1.36260058602676e-06	6.00183350494665	96.0139880841953	1.13632118998337	0.0132724305624095	8.24408228909173e-05	1.14250776552412	8
1778	1	0.000100629046605262	0.000314739670026114	-1071.71682700755	5.82842853135621e-06	2.09762390173102e-06	8.52540630062765	107.730196974896	0.96896886295781	0.0189325281006347	0.0001531250026268	1.53865143534419	8
1779	1	-0.000190296886353039	0.000147613090276565	-416.732234133938	6.42115266611675e-06	1.8403741502651e-06	7.73325504368207	37.8006944948257	0.998164971273681	0.0137989515600054	0.000297796873337473	2.16947282680106	8
1780	1	-0.000179196614031542	0.000243584817398131	-742.871286765855	5.00439197428811e-06	1.38563845616886e-06	5.87199958994914	53.6594158312947	0.779456819821306	0.0173261702158527	0.000181548044759028	1.81460348161919	8
1781	1	3.30739660735917e-05	0.000244747820020438	-814.00517866948	5.03315313127651e-06	1.75163716616586e-06	7.35755731776549	97.6960370866495	1.15841560961387	0.0141504777776902	0.000106692073926336	1.53200993738394	8
1782	1	-0.000229088552515413	0.000159369617303107	-443.339604546143	4.94072305408647e-06	1.46721789598771e-06	6.1907256741787	34.8251073142851	0.629855826932719	0.0159895507175349	0.000237289289289424	1.45241397128983	8
1783	1	-0.000532866733443542	5.06921745821425e-05	19.2770041726936	8.97536095174699e-06	3.00805958552142e-06	12.89144385014	5.43425414930769	0.333199502333914	0.0306688523702974	0.000512199000499061	1.62840984050778	8
1784	1	6.83776810432936e-05	0.000213630563265317	-722.330800167417	4.74797501911958e-06	1.43744257552631e-06	6.20249841378427	107.748540009158	1.16048411693343	0.0128518307606669	0.000114148355594067	1.34438270895273	8
1785	1	-6.97425106346186e-05	0.00032516447977954	-1051.30989576078	1.13648888186876e-05	2.48971381717428e-06	11.7214523284823	77.8943925979837	1.91659591834987	0.0190542667694444	0.0001951974843631	1.37862217902422	8
1786	1	-0.000252705343828461	0.000262075341165505	-779.510971029765	5.76232880636437e-06	1.87040349533014e-06	7.98066291261796	46.0427780989711	0.684040532615105	0.0208593989237045	0.000241805085314658	2.49877886465243	8
1787	1	-0.000271457012830573	0.000246990538767868	-721.51609078374	7.93243849511681e-06	2.824463754241e-06	11.8631973207677	42.2981135034079	0.8949641817317	0.0210278808094699	0.000353370603212718	2.38676938075481	8
1788	1	0.000571577170914211	0.000328189997673913	-1269.80471853993	6.37164233950894e-06	1.67482819645066e-06	7.53196918785938	150.136282267647	0.303330850118991	0.0377634831502291	0.000320177034824774	1.21479401110731	8
1789	1	-0.00015324226178934	0.000259989025234801	-801.411832682392	5.15777838003631e-06	1.71291617920838e-06	7.3250434795018	59.4841288494368	0.859595885321873	0.0172913193445083	0.000172237744380676	1.57185698419423	8
1790	1	0.000288764710197987	0.000301840085577382	-1089.76610575551	1.36947803663353e-05	2.54528611463178e-06	11.2605535640041	133.731738263278	1.37859518204109	0.0239337628520389	0.000552558335150869	1.76217652737728	8
1791	1	0.000131588597668146	0.000244717511302973	-845.368743451608	9.68705405755318e-06	3.49418087439297e-06	14.20754536269	118.267644471205	1.79212662954192	0.0159197965904241	0.000316519073512166	2.03145102577212	8
1792	1	-0.000122556075240933	0.000218337132164988	-675.167665999895	6.14203636958797e-06	1.90521113897629e-06	8.23930783004137	60.6938154709592	1.24406205734777	0.0143458256938231	0.000196805001277267	2.08548502473201	8
1793	1	0.000570426019585654	0.000404949691412918	-1525.34062958146	1.20338290182664e-05	3.21084766719607e-06	14.2688456782652	144.628773126416	0.609512997301214	0.0400812516761562	0.000572217711130828	2.17220495648387	8
1794	1	-0.000116411997785775	0.000206102365844734	-636.463108305701	5.57118462687567e-06	1.38065981988458e-06	6.27261474081366	60.5411045250777	1.18562269460822	0.0135622796988173	0.000171430651737441	1.72107606956507	8
1795	1	-0.000295344175362826	0.000291904760444434	-866.356924788684	5.78071864476903e-06	2.46439627076511e-06	9.79854551894032	44.6644324176812	0.610615657544311	0.0237923476261983	0.000255625953695158	2.71483150985502	8
1796	1	-0.000196731845740052	0.000176901272440942	-513.009606652528	5.29552526184404e-06	1.7699573066264e-06	7.30967529974094	41.9618777952232	0.818055286879016	0.0151587650784393	0.000235582810594934	1.87578140027243	8
1797	1	0.000156495521667196	0.000306816112351896	-1061.19011111761	4.18092628201136e-06	1.13758951737597e-06	4.889749121399	117.024442368012	0.625507474229573	0.0197339645493457	0.000123362455197004	2.1680721908914	8
1798	1	-0.000171832211667342	0.00032080636199805	-1001.34593664211	7.33418408557675e-06	3.02961450433203e-06	12.2627649080056	61.825342774822	1.04247744145754	0.0208514935724224	0.000250560854765937	2.61526414504686	8
1799	1	-0.000420729011257917	0.000231785191821597	-624.150365538821	1.03382903521527e-05	3.20265293720052e-06	13.9175560198724	28.8509517873547	0.682652214954377	0.0275220943613874	0.000526319212790047	2.75582388634862	8
1800	1	0.000258168608499827	0.000300820940971712	-1074.64844215158	5.02215795640254e-06	1.28793919491457e-06	5.49557918725678	130.636640302048	0.564019645051197	0.022712863099315	0.000195586792279948	2.07860781779404	8
1801	1	0.000147148670724311	0.000321385757905657	-1109.16482901884	1.33365658861545e-05	3.49155543088564e-06	15.829882207469	114.600999622497	1.97963121548633	0.0202523785172275	0.000366435813437118	2.5012775194583	8
1802	1	-0.00025531419918368	0.000145277511041301	-388.039877436102	5.15890134972904e-06	1.43928745501551e-06	6.20156951764562	29.6405088324772	0.554235173156801	0.0168308134952611	0.00026012190685981	1.53627532563488	8
1803	1	0.000126754998833575	0.000344701564280621	-1179.78343311796	5.46650737346498e-06	1.63877618026977e-06	7.10548664068082	110.189680669133	0.805252192042869	0.0210429221125139	0.000139467234777166	1.64330325167413	8
1804	1	-8.66367806138239e-05	0.000174405067162728	-539.786541821265	3.74813697406432e-06	1.03479755255009e-06	4.5640868120497	63.5838311928159	0.996873870142769	0.011157690479024	0.000109304751680447	1.38564317732257	8
1805	1	0.000238990975385568	0.000211455084739576	-771.010453173574	9.8204246789215e-06	1.48961831796351e-06	7.43199422373855	138.498153550852	1.18545687504184	0.0182835430969703	0.000425180239688991	1.94485459991462	8
1806	1	-4.38852629964522e-05	0.000275645050326594	-890.144944938703	2.92452522386022e-06	8.57186047285543e-07	3.59276509883882	80.9538999479924	0.593511346517032	0.0159922062179874	5.51957476640318e-05	1.34049415518882	8
1807	1	0.000133980594804329	0.00024085893626257	-834.240183109087	1.17833605550386e-05	1.89756313280347e-06	8.96978194897787	119.08551049899	2.14923175658394	0.0157915965205575	0.000341669984170519	1.74264013386182	8
1808	1	0.000256676069815855	0.000404162526837782	-1421.80146375262	6.10232711245897e-06	2.45146440358927e-06	9.94185538525803	122.4188675016	0.636203552821299	0.0274320511580868	0.000221795104733724	1.3272743336819	8
1809	1	0.00049463142892113	0.000307163444897692	-1172.92694632123	5.85901670326211e-06	1.0946821899274e-06	4.9989240691087	148.159942396517	0.317630314768084	0.0333601966680988	0.000287095639616004	1.84140213751118	8
1810	1	-0.000392164346960672	0.000149768108452104	-358.0039735376	9.8704233858439e-06	1.57993413532029e-06	7.97977514358218	20.9019261693	0.521143672292954	0.0240521745789124	0.000529303353287003	1.52877866562857	8
[truncated: 148,190 more rows]
