# Supplementary material for: A multi-proxy assessment of terrace formation in the lower Trinity River valley, Texas
Source: Copernicus journal article supplement (doi:10.5194/esurf-10-635-2022), 2022-06-28
Supplement: Supplementary file 1 [file esurf-10-635-2022-supplement.zip › TrinityTerraces_characteristics.csv]

Terrace ID	GarMS_Clas	median elevation (m)	1st quartile elevation(m)	3rd quartile elevation(m)	median detrended elevation (m)	1st quartile detrended elevation(m)	3rd quartile detrended elevation(m)	median UTM easting (m)	1st quartile UTM easting (m)	3rd quartile UTM easting (m)	median UTM northing (m)	1st quartile UTM northing (m)	3rd quartile UTM northing (m)	Terrace ID of adjacent higher terraces	Terrace ID of lower adjacent terraces	minimum bounding box width (m)	minimum bounding box length (m)
0	1	18.9285717	18.64740991	19.25	-0.929716	-1.167277425	-0.664148	318457.1423	317807.1408	319107.1439	3372554.831	3371655.052	3373454.61	44;1	NaN	3987.473	4714.884
1	2	21.87162495	21.24625015	22.57348633	3.016035	2.49609005	3.5320051	318457.1423	316557.1378	319907.1458	3369155.666	3367556.059	3370905.236	2	0	7601.292	9290.538
2	3	23.84033299	23.21933365	24.39083958	4.78766515	4.2791648	5.2584901	315857.1361	315607.1355	316107.1367	3369905.481	3369605.555	3370155.42	NaN	1	1291.169	1428.753
3	2	24.92333412	24.02333355	25.13916636	5.4228101	4.546512475	5.714632625	322507.1519	322407.1517	322657.1523	3370755.273	3370405.359	3371155.174	5	NaN	862.543	2444.755
4	1	20.57600021	20.05999947	21.19149971	2.05146505	1.61023505	2.54796505	323707.1548	323457.1542	323907.1553	3368105.923	3367756.009	3368405.85	5;6	NaN	992.189	1799.17
5	3	24.56018353	23.54000092	25.76799965	5.36479	4.95543	5.8125	327857.1646	325407.1588	329507.1686	3370505.334	3367756.009	3372204.917	36	3;4;6;9	10733.18	12845.547
6	2	18.15600014	17.0922246	19.24408674	-0.267003	-1.036295	0.8532895	326207.1607	325207.1584	327557.1639	3367256.132	3365956.451	3368805.752	5;9	4	6204.492	7315.744
7	3	22.49666595	21.82999992	23.06509781	6.2321501	5.675012325	6.858397625	330257.1703	329957.1696	330707.1714	3359957.925	3359657.999	3360407.814	NaN	10	2597.302	2828.861
8	0	22.31359863	20.98612547	22.77750063	6.7526302	5.641569975	7.1431423	331857.1742	331657.1737	332207.175	3357908.428	3357558.514	3358208.355	NaN	10	1364.366	1682.568
9	3	19.58666611	19.26223278	20.23670816	2.7120299	2.30667	3.1455975	328907.1671	328794.6669	329107.1676	3362507.299	3362257.36	3363057.164	5	6	841.377	1698.628
10	1	14.27453566	13.69485378	14.89000034	0.106786	-0.23645125	0.4446805	330107.17	329557.1687	330557.1711	3352759.693	3351060.111	3355459.03	7;8;16	NaN	4381.509	10048.895
11	1	30.03833389	27.4706254	32.30213738	13.0205002	10.21464995	15.84802485	320057.1461	319844.6456	320257.1466	3363257.115	3363207.127	3363307.102	NaN	12	279.401	1085.852
12	1	18.48111153	18.14750052	18.89107943	1.54125	1.19894	1.926489975	321757.1502	320957.1483	322557.1521	3362857.213	3362607.274	3363007.176	11	NaN	1212.852	4089.408
13	2	18.04546738	17.1794138	18.5838747	1.08046505	0.435438	1.562165	319457.1447	317807.1408	321557.1497	3363107.151	3360632.759	3364756.746	NaN	NaN	9239.268	10287.021
14	2	16.71875	16.23500061	17.29856253	3.210505	2.61644505	3.69496	322307.1515	321757.1502	322857.1528	3351709.951	3351210.074	3352309.804	NaN	NaN	2905.131	3270.257
15	3	17.92000008	17.61524963	18.1937499	5.1513	4.8534901	5.467712625	331607.1736	331219.6726	331807.174	3348610.712	3348260.798	3349010.614	NaN	16	1531.941	1778.004
16	2	15.41250038	13.8166666	16.15081406	3.1041601	1.64813	3.8347325	330107.17	329157.1677	330907.1719	3347011.105	3345911.375	3348160.823	15;17	10	4836.593	7323.681
17	3	17.09583283	16.37633324	17.52669716	6.0268149	5.33670995	6.5200648	331057.1723	330707.1714	331432.1732	3342862.124	3342562.198	3343212.038	NaN	18	1766.097	2083.598
18	2	12.88500023	12.3166666	13.27416682	2.62111995	1.95897	3.3596599	329357.1682	328657.1665	329957.1696	3339912.849	3338213.266	3341512.456	17;37;19	NaN	4460.884	7834.328
19	3	14.25749969	13.67000008	14.56499958	5.9588199	5.381212475	6.288145175	330207.1702	329807.1693	330657.1713	3333464.433	3332814.592	3335014.052	18	37	3278.194	5455.254
20	3	12.00464296	11.08727264	12.7877779	6.62554	6.2587099	7.0792999	330057.1699	329207.1679	331507.1733	3323516.876	3321567.355	3326966.029	38	21;31	6564.987	11228.278
21	2	9.317500115	8.74400043	9.81700039	2.8875699	2.36214995	3.37155495	327057.1627	326507.1614	327607.1641	3327965.783	3327115.992	3329165.489	20;22	NaN	4034.904	4207.772
22	3	11.17100001	9.37250042	12.04649973	5.38108015	3.533615	6.2054298	324757.1573	324557.1568	325157.1582	3325866.299	3325716.336	3325966.274	NaN	21	703.793	1322.919
23	1	11.68393374	11.36800003	12.18249989	-0.013133	-0.290903	0.390456	321607.1498	321007.1484	322607.1522	3345461.486	3345061.584	3345861.388	24	NaN	3254.382	4389.446
24	3	16.21291638	15.875	16.61249924	4.62605	4.2729602	4.9562898	324257.1561	324057.1556	324457.1566	3345211.547	3345161.559	3345261.535	NaN	23	531.814	1031.877
25	0	15.71333313	14.24125028	19.07289744	6.0083499	3.659675	9.072035325	323257.1537	323157.1535	323344.654	3339512.947	3339412.971	3339612.922	NaN	NaN	469.636	648.23
26	2	9.92000008	9.256874795	10.40906215	1.77318	1.14075	2.334502475	320757.1478	320357.1468	321207.1488	3333614.396	3333164.506	3334064.285	NaN	NaN	2222.504	2370.671
27	2	9.072666645	8.80599976	9.45750046	1.4124	1.1936225	1.71578	324507.1567	324357.1563	324707.1572	3332114.764	3331914.813	3332414.69	28	NaN	1016.002	1502.836
28	2	10.5	10.2874999	10.65999985	3.0662301	2.91516245	3.165275025	323957.1554	323857.1551	324107.1557	3331414.936	3331264.973	3331614.887	29	27	751.418	1090.086
29	3	12.38216639	12.07999993	13.09142876	5.260885	4.946455	5.774955	323507.1543	323407.1541	323607.1546	3330665.12	3330465.169	3330865.071	NaN	28	624.418	1354.669
30	2	5.563999895	4.78250003	6.657500025	0.904633	0.194576	1.959542425	326857.1623	326407.1612	327257.1632	3321917.269	3320967.502	3322817.048	NaN	NaN	2330.455	5759.462
31	2	5.01800013	4.09100008	5.81699991	2.2214701	1.0487725	2.813164925	331357.173	330357.1706	332357.1753	3315818.767	3314169.172	3318318.153	20;32;33;39;34	NaN	6646.347	9588.519
32	3	8.41699982	8.144500018	8.60999966	4.92553	4.6045649	5.0768949	333107.1771	332857.1765	333407.1778	3318168.19	3317818.276	3318568.092	NaN	31	1409.703	1930.404
33	3	8.99600029	8.56099987	9.39999962	7.2173901	6.96021505	7.45113255	334857.1813	334157.1796	335457.1827	3312119.676	3311119.921	3313519.332	NaN	31;34	5146.156	6667.513
34	3	7.39300013	6.93474996	7.62925005	5.6952801	5.265920025	5.905909875	331307.1728	331107.1724	331619.6736	3312269.639	3311819.749	3312469.59	33	31	1250.953	1339.853
35	1	15.72999954	15.5	15.92000008	0.792875	0.57785875	0.94441025	326557.1616	326307.161	326807.1622	3355958.907	3355708.969	3356258.834	NaN	NaN	1389.065	1971.15
36	3	23.36416435	22.84388876	23.67814255	6.2062602	5.749407625	6.459470175	330907.1719	330657.1713	331207.1726	3363057.164	3362707.25	3363407.078	NaN	5	1492.253	2082.804
37	3	15.72450018	15.21562481	16.23099995	6.25971985	5.59128	6.9769502	330857.1718	330457.1708	331157.1725	3337913.34	3336713.635	3338763.131	NaN	18;19	2333.63	4667.259
38	3	16.8579998	15.95024991	17.52899933	10.4350996	9.6781528	11.05644993	330707.1714	330307.1705	331107.1724	3327715.845	3327165.98	3328215.722	NaN	20	2293.942	3714.757
39	3	10.33799982	10.00349999	10.70650006	7.1631949	6.8717899	7.51884985	333407.1778	333207.1774	333557.1782	3316893.503	3316768.534	3317018.472	NaN	31	812.802	1009.652
40	2	5.73000002	4.80524993	6.340750098	5.7778502	4.715627425	6.28200255	334657.1808	333907.179	335357.1825	3306321.1	3305421.321	3307270.867	41	NaN	3444.882	4484.696
41	3	6.53299999	6.07200003	6.98799992	7.5732498	7.283242325	7.9154323	335907.1838	335357.1825	336307.1847	3302771.972	3302072.144	3303621.763	NaN	40;42	2365.38	3841.758
42	3	4.46999979	4.12900019	4.88899994	5.7631001	5.3960749	6.0769327	333957.1791	333357.1777	334507.1804	3302322.082	3301872.193	3302871.947	41	43	3209.539	3444.882
43	2	2.07200003	1.875	2.28399992	3.4994949	3.27003	3.6995699	331857.1742	331357.173	332307.1752	3302122.131	3301572.266	3302372.07	42	NaN	1698.628	3074.464
44	2	22.6590004	21.73464298	23.54162312	1.558285	0.868967	2.071635	318057.1414	316007.1365	319457.1447	3376603.836	3375454.118	3378203.443	45;46;1	0	2432.055	4756.16
45	3	25.89999962	25.46650029	26.34499931	3.8738101	3.641887575	4.153502475	317657.1404	317257.1395	318007.1412	3379353.161	3378453.382	3380852.792	46	44	8682.055	11225.235
46	2	29.28750038	28.19714355	30.06833267	7.63532495	6.3835001	8.9059095	312557.1283	311057.1247	314257.1323	3379303.173	3374804.278	3380752.817	NaN	51;45;44	1817.691	3040.069
47	1	26.81900024	26.50333405	27.17833328	3.54913495	3.2491601	3.93963	314557.1331	313957.1316	315357.135	3383652.105	3383352.178	3383952.031	NaN	NaN	1984.379	2725.214
49	2	26.05547619	25.50749969	26.5	2.40409005	1.97276	2.7850201	306157.1131	305757.1121	306557.114	3385351.687	3385051.761	3385751.589	50	48	2746.38	5707.074
50	3	27.93000031	27.64999962	28.22999954	4.0928102	3.874365	4.370829975	308607.1189	307657.1167	310407.1232	3385651.614	3385301.7	3386151.491	NaN	49	3571.882	3984.633
51	0	31.13666725	30.51578618	31.81937456	6.7083802	6.1220801	7.324000025	309357.1207	308757.1193	310107.1225	3388051.024	3387351.196	3388650.877	46	NaN	8864.618	8986.062
	0	27.15999985	26.69000053	27.50330353	4.2801249	3.7458949	4.63618015	311407.1256	310607.1237	312157.1273	3382702.338	3382202.461	3383252.203			2778.131	4389.446
